# Supplementary material
Source: PubMed Central journal article supplement (PMC3638018)
Supplement: NIHMS437751-supplement-1.pdf [file NIHMS437751-supplement-1.pdf]

# Supplemental Material

## Supplemental Figure I



**Supplemental Figure 1.** Western blot showing levels of Collagen 1 in LA, HA and SMC supernatants.

# Supplemental Figure II



Supplemental Table I

| LA Fibroblasts |                                                                                                  |
|----------------|--------------------------------------------------------------------------------------------------|
| Symbol         | Name                                                                                             |
| A16L2_HUMAN    | Autophagy-related protein 16-2 - Homo sapiens (Human)                                            |
| A1AT_HUMAN     | Alpha-1-antitrypsin precursor - Homo sapiens (Human)                                             |
| A2MG_HUMAN     | Alpha-2-macroglobulin precursor - Homo sapiens (Human)                                           |
| ACTA_HUMAN     | Actin, aortic smooth muscle OS=Homo sapiens GN=ACTA2 PE=1 SV=1                                   |
| ACTB_HUMAN     | Actin, cytoplasmic 1 - Homo sapiens (Human)                                                      |
| ACTN1_HUMAN    | Alpha-actinin-1 - Homo sapiens (Human)                                                           |
| ADAM9_HUMAN    | Disintegrin and metalloproteinase domain-containing protein 9 OS=Homo sapiens GN=ADAM9 PE=1 SV=1 |
| ALBU_HUMAN     | Serum albumin precursor - Homo sapiens (Human)                                                   |
| ALDOA_HUMAN    | Fructose-bisphosphate aldolase A - Homo sapiens (Human)                                          |
| ARFP1_HUMAN    | Arfaptin-1 - Homo sapiens (Human)                                                                |
| ATP7A_HUMAN    | Copper-transporting ATPase 1 OS=Homo sapiens GN=ATP7A PE=1 SV=3                                  |
| ATPA_HUMAN     | ATP synthase subunit alpha, mitochondrial precursor - Homo sapiens (Human)                       |
| B2MG_HUMAN     | Beta-2-microglobulin OS=Homo sapiens GN=B2M PE=1 SV=1                                            |
| BGH3_HUMAN     | Transforming growth factor-beta-induced protein ig-h3 OS=Homo sapiens GN=TGFBI PE=1 SV=1         |
| C1R_HUMAN      | Complement C1r subcomponent precursor - Homo sapiens (Human)                                     |
| C1S_HUMAN      | Complement C1s subcomponent precursor - Homo sapiens (Human)                                     |
| CAB45_HUMAN    | 45 kDa calcium-binding protein OS=Homo sapiens GN=SDF4 PE=1 SV=1                                 |
| CALU_HUMAN     | Calumenin precursor - Homo sapiens (Human)                                                       |
| CATB_HUMAN     | Cathepsin B precursor - Homo sapiens (Human)                                                     |
| CD59_HUMAN     | CD59 glycoprotein OS=Homo sapiens GN=CD59 PE=1 SV=1                                              |
| CLC11_HUMAN    | C-type lectin domain family 11 member A precursor - Homo sapiens (Human)                         |
| CLUS_HUMAN     | Clusterin precursor - Homo sapiens (Human)                                                       |
| CO1A1_HUMAN    | Collagen alpha-1(I) chain precursor - Homo sapiens (Human)                                       |
| CO1A2_HUMAN    | Collagen alpha-2(I) chain precursor - Homo sapiens (Human)                                       |
| CO3A1_HUMAN    | Collagen alpha-1(III) chain precursor - Homo sapiens (Human)                                     |
| CO6A1_HUMAN    | Collagen alpha-1(VI) chain precursor - Homo sapiens (Human)                                      |
| CO6A2_HUMAN    | Collagen alpha-2(VI) chain precursor - Homo sapiens (Human)                                      |
| CO6A3_HUMAN    | Collagen alpha-3(VI) chain precursor - Homo sapiens (Human)                                      |
| COCA1_HUMAN    | Collagen alpha-1(XII) chain precursor - Homo sapiens (Human)                                     |
| CRIM1_HUMAN    | Cysteine-rich motor neuron 1 protein OS=Homo sapiens GN=CRIM1 PE=1 SV=1                          |
| CSRP1_HUMAN    | Cysteine and glycine-rich protein 1 OS=Homo sapiens GN=CSRP1 PE=1 SV=3                           |
| CSTN1_HUMAN    | Calsyntenin-1 precursor - Homo sapiens (Human)                                                   |
| CYTC_HUMAN     | Cystatin-C OS=Homo sapiens GN=CST3 PE=1 SV=1                                                     |
| DHDDS_HUMAN    | Dehydrodolichyl diphosphate synthase - Homo sapiens (Human)                                      |
| DKK3_HUMAN     | Dickkopf-related protein 3 precursor - Homo sapiens (Human)                                      |
| EBI2_HUMAN     | EBV-induced G-protein coupled receptor 2 - Homo sapiens (Human)                                  |
| ECM1_HUMAN     | Extracellular matrix protein 1 precursor - Homo sapiens (Human)                                  |
| FAK2_HUMAN     | Protein tyrosine kinase 2 beta - Homo sapiens (Human)                                            |
| FBLN3_HUMAN    | EGF-containing fibulin-like extracellular matrix protein 1 precursor - Homo sapiens (Human)      |
| FETA_HUMAN     | Alpha-fetoprotein precursor - Homo sapiens (Human)                                               |
| FETUA_HUMAN    | Alpha-2-HS-glycoprotein OS=Homo sapiens GN=AHSG PE=1 SV=1                                        |
| FINC_HUMAN     | Fibronectin precursor - Homo sapiens (Human)                                                     |
| FLNA_HUMAN     | Filamin-A OS=Homo sapiens GN=FLNA PE=1 SV=4                                                      |
| FMN1_HUMAN     | Formin-1 - Homo sapiens (Human)                                                                  |
| FST_HUMAN      | Follistatin precursor - Homo sapiens (Human)                                                     |
| FSTL1_HUMAN    | Follistatin-related protein 1 precursor - Homo sapiens (Human)                                   |
| GALT2_HUMAN    | Polypeptide N-acetylgalactosaminyltransferase 2 OS=Homo sapiens GN=GALNT2 PE=1 SV=1              |

|             |                                                                                                         |
|-------------|---------------------------------------------------------------------------------------------------------|
| GALT5_HUMAN | Polypeptide N-acetylgalactosaminyltransferase 5 - Homo sapiens (Human)                                  |
| GAS6_HUMAN  | Growth arrest-specific protein 6 precursor - Homo sapiens (Human)                                       |
| GELS_HUMAN  | Gelsolin OS=Homo sapiens GN=GSN PE=1 SV=1                                                               |
| HSP76_HUMAN | Heat shock 70 kDa protein 6 - Homo sapiens (Human)                                                      |
| HSP7C_HUMAN | Heat shock cognate 71 kDa protein - Homo sapiens (Human)                                                |
| IBP2_HUMAN  | Insulin-like growth factor-binding protein 2 OS=Homo sapiens GN=IGFBP2 PE=1 SV=1                        |
| IBP4_HUMAN  | Insulin-like growth factor-binding protein 4 OS=Homo sapiens GN=IGFBP4 PE=1 SV=2                        |
| IBP5_HUMAN  | Insulin-like growth factor-binding protein 5 OS=Homo sapiens GN=IGFBP5 PE=1 SV=1                        |
| IBP7_HUMAN  | Insulin-like growth factor-binding protein 7 precursor - Homo sapiens (Human)                           |
| IC1_HUMAN   | Plasma protease C1 inhibitor precursor - Homo sapiens (Human)                                           |
| ITGBL_HUMAN | Integrin beta-like protein 1 precursor - Homo sapiens (Human)                                           |
| ITIH2_HUMAN | Inter-alpha-trypsin inhibitor heavy chain H2 precursor - Homo sapiens (Human)                           |
| K1C10_HUMAN | Keratin, type I cytoskeletal 10 OS=Homo sapiens GN=KRT10 PE=1 SV=5                                      |
| K1C14_HUMAN | Keratin, type I cytoskeletal 14 OS=Homo sapiens GN=KRT14 PE=1 SV=4                                      |
| K1C9_HUMAN  | Keratin, type I cytoskeletal 9 OS=Homo sapiens GN=KRT9 PE=1 SV=3                                        |
| K22E_HUMAN  | Keratin, type II cytoskeletal 2 epidermal OS=Homo sapiens GN=KRT2 PE=1 SV=2                             |
| K2C1_HUMAN  | Keratin, type II cytoskeletal 1 - Homo sapiens (Human)                                                  |
| K2C1B_HUMAN | Keratin, type II cytoskeletal 1b - Homo sapiens (Human)                                                 |
| K2C7_HUMAN  | Keratin, type II cytoskeletal 7 OS=Homo sapiens GN=KRT7 PE=1 SV=3                                       |
| K2C73_HUMAN | Keratin, type II cytoskeletal 73 - Homo sapiens (Human)                                                 |
| KNG1_HUMAN  | Kininogen-1 OS=Homo sapiens GN=KNG1 PE=1 SV=2                                                           |
| LAMC1_HUMAN | Laminin subunit gamma-1 precursor - Homo sapiens (Human)                                                |
| LDHB_HUMAN  | L-lactate dehydrogenase B chain - Homo sapiens (Human)                                                  |
| LEG1_HUMAN  | Galectin-1 OS=Homo sapiens GN=LGALS1 PE=1 SV=2                                                          |
| LG3BP_HUMAN | Galectin-3-binding protein OS=Homo sapiens GN=LGALS3BP PE=1 SV=1                                        |
| LTB1L_HUMAN | Latent-transforming growth factor beta-binding protein, isoform 1L precursor - Homo sapiens (Human)     |
| LTBP2_HUMAN | Latent-transforming growth factor beta-binding protein 2 precursor - Homo sapiens (Human)               |
| LUM_HUMAN   | Lumican precursor - Homo sapiens (Human)                                                                |
| LYOX_HUMAN  | Protein-lysine 6-oxidase OS=Homo sapiens GN=LOX PE=1 SV=2                                               |
| MASP1_HUMAN | Complement-activating component of Ra-reactive factor precursor - Homo sapiens (Human)                  |
| MFGM_HUMAN  | Lactadherin precursor - Homo sapiens (Human)                                                            |
| MMP2_HUMAN  | 72 kDa type IV collagenase precursor - Homo sapiens (Human)                                             |
| NID2_HUMAN  | Nidogen-2 precursor - Homo sapiens (Human)                                                              |
| NUCB1_HUMAN | Nucleobindin-1 precursor - Homo sapiens (Human)                                                         |
| NUP93_HUMAN | Nuclear pore complex protein Nup93 - Homo sapiens (Human)                                               |
| OPHN1_HUMAN | Oligophrenin 1 - Homo sapiens (Human)                                                                   |
| PAI1_HUMAN  | Plasminogen activator inhibitor 1 precursor - Homo sapiens (Human)                                      |
| PCOC1_HUMAN | Procollagen C-endopeptidase enhancer 1 precursor - Homo sapiens (Human)                                 |
| PGBM_HUMAN  | Basement membrane-specific heparan sulfate proteoglycan core protein OS=Homo sapiens GN=HSPG2 PE=1 SV=3 |
| PGS1_HUMAN  | Biglycan precursor - Homo sapiens (Human)                                                               |
| PGS2_HUMAN  | Decorin precursor - Homo sapiens (Human)                                                                |
| PLTP_HUMAN  | Phospholipid transfer protein precursor - Homo sapiens (Human)                                          |
| PPIA_HUMAN  | Peptidyl-prolyl cis-trans isomerase A OS=Homo sapiens GN=PPIA PE=1 SV=2                                 |
| PTGDS_HUMAN | Prostaglandin-H2 D-isomerase OS=Homo sapiens GN=PTGDS PE=1 SV=1                                         |
| PTX3_HUMAN  | Pentraxin-related protein PTX3 precursor - Homo sapiens (Human)                                         |
| PXDN_HUMAN  | Peroxidasin homolog OS=Homo sapiens GN=PXDN PE=1 SV=2                                                   |
| QSOX1_HUMAN | Sulfhydryl oxidase 1 precursor - Homo sapiens (Human)                                                   |
| RAB19_HUMAN | Ras-related protein Rab-19 - Homo sapiens (Human)                                                       |
| RARR2_HUMAN | Retinoic acid receptor responder protein 2 OS=Homo sapiens GN=RARRS2 PE=1 SV=1                          |
| RS28_HUMAN  | 40S ribosomal protein S28 OS=Homo sapiens GN=RPS28 PE=1 SV=1                                            |

|              |                                                                    |
|--------------|--------------------------------------------------------------------|
| RXFP1_HUMAN  | Relaxin receptor 1 - Homo sapiens (Human)                          |
| S10A6_HUMAN  | Protein S100-A6 - Homo sapiens (Human)                             |
| SELN_HUMAN   | Selenoprotein N precursor - Homo sapiens (Human)                   |
| SGSM2_HUMAN  | Small G protein signaling modulator 2 - Homo sapiens (Human)       |
| SLOC2B_HUMAN | Slp homolog lacking C2 domains b - Homo sapiens (Human)            |
| SMTN_HUMAN   | Smoothelin OS=Homo sapiens GN=SMTN PE=1 SV=5                       |
| SNX9_HUMAN   | Sorting nexin-9 OS=Homo sapiens GN=SNX9 PE=1 SV=1                  |
| SOX30_HUMAN  | Transcription factor SOX-30 - Homo sapiens (Human)                 |
| SPON2_HUMAN  | Spondin-2 OS=Homo sapiens GN=SPON2 PE=1 SV=2                       |
| SPRC_HUMAN   | SPARC precursor - Homo sapiens (Human)                             |
| STC2_HUMAN   | Stanniocalcin-2 precursor - Homo sapiens (Human)                   |
| TAGL_HUMAN   | Transgelin OS=Homo sapiens GN=TAGLN PE=1 SV=4                      |
| TBA1A_HUMAN  | Tubulin alpha-1A chain OS=Homo sapiens GN=TUBA1A PE=1 SV=1         |
| TCEA3_HUMAN  | Transcription elongation factor A protein 3 - Homo sapiens (Human) |
| TEIN_HUMAN   | Tetranectin OS=Homo sapiens GN=CLEC3B PE=1 SV=2                    |
| THBG_HUMAN   | Thyroxine-binding globulin precursor - Homo sapiens (Human)        |
| TIG1_HUMAN   | Retinoic acid receptor responder protein 1 - Homo sapiens (Human)  |
| TIMP1_HUMAN  | Metalloproteinase inhibitor 1 precursor - Homo sapiens (Human)     |
| TIMP2_HUMAN  | Metalloproteinase inhibitor 2 precursor - Homo sapiens (Human)     |
| TPIS_HUMAN   | Triosephosphate isomerase OS=Homo sapiens GN=TP11 PE=1 SV=2        |
| TRFE_HUMAN   | Serotransferrin precursor - Homo sapiens (Human)                   |
| TRFL_HUMAN   | Lactotransferrin precursor - Homo sapiens (Human)                  |
| TRI55_HUMAN  | Tripartite motif-containing protein 55 - Homo sapiens (Human)      |
| UBE4B_HUMAN  | Ubiquitin conjugation factor E4 B - Homo sapiens (Human)           |
| UBIQ_HUMAN   | Ubiquitin OS=Homo sapiens GN=RPS27A PE=1 SV=1                      |
| VASN_HUMAN   | Vasorin OS=Homo sapiens GN=VASN PE=1 SV=1                          |
| VIME_HUMAN   | Vimentin - Homo sapiens (Human)                                    |
| WDR87_HUMAN  | WD repeat-containing protein 87 - Homo sapiens (Human)             |
| ZYX_HUMAN    | Zyxin OS=Homo sapiens GN=ZYX PE=1 SV=1                             |

| HA Fibroblasts |                                                                                          |
|----------------|------------------------------------------------------------------------------------------|
| Symbol         | Name                                                                                     |
| 1433Z_HUMAN    | 14-3-3 protein zeta/delta - Homo sapiens (Human)                                         |
| A2MG_HUMAN     | Alpha-2-macroglobulin precursor - Homo sapiens (Human)                                   |
| ACTB_HUMAN     | Actin, cytoplasmic 1 - Homo sapiens (Human)                                              |
| ACTN1_HUMAN    | Alpha-actinin-1 - Homo sapiens (Human)                                                   |
| ADML_HUMAN     | ADM OS=Homo sapiens GN=ADM PE=1 SV=1                                                     |
| AHNK_HUMAN     | Neuroblast differentiation-associated protein AHNAK OS=Homo sapiens GN=AHNAK PE=1 SV=2   |
| ALBU_HUMAN     | Serum albumin precursor - Homo sapiens (Human)                                           |
| ALDOA_HUMAN    | Fructose-bisphosphate aldolase A - Homo sapiens (Human)                                  |
| ALMS1_HUMAN    | Alstrom syndrome protein 1 - Homo sapiens (Human)                                        |
| APOH_HUMAN     | Beta-2-glycoprotein 1 OS=Homo sapiens GN=APOH PE=1 SV=3                                  |
| ARFP1_HUMAN    | Arfaptin-1 OS=Homo sapiens GN=ARFIP1 PE=1 SV=2                                           |
| ATP7A_HUMAN    | Copper-transporting ATPase 1 - Homo sapiens (Human)                                      |
| B2MG_HUMAN     | Beta-2-microglobulin OS=Homo sapiens GN=B2M PE=1 SV=1                                    |
| BGH3_HUMAN     | Transforming growth factor-beta-induced protein ig-h3 OS=Homo sapiens GN=TGFBI PE=1 SV=1 |
| C1R_HUMAN      | Complement C1r subcomponent precursor - Homo sapiens (Human)                             |
| C1S_HUMAN      | Complement C1s subcomponent precursor - Homo sapiens (Human)                             |
| CAB45_HUMAN    | 45 kDa calcium-binding protein precursor - Homo sapiens (Human)                          |

|              |                                                                                             |
|--------------|---------------------------------------------------------------------------------------------|
| CALR_HUMAN   | Calreticulin precursor - Homo sapiens (Human)                                               |
| CALU_HUMAN   | Calumenin precursor - Homo sapiens (Human)                                                  |
| CATB_HUMAN   | Cathepsin B precursor - Homo sapiens (Human)                                                |
| CH3L1_HUMAN  | Chitinase-3-like protein 1 precursor - Homo sapiens (Human)                                 |
| CLC11_HUMAN  | C-type lectin domain family 11 member A precursor - Homo sapiens (Human)                    |
| CLUS_HUMAN   | Clusterin precursor - Homo sapiens (Human)                                                  |
| CO1A1_HUMAN  | Collagen alpha-1(I) chain precursor - Homo sapiens (Human)                                  |
| CO1A2_HUMAN  | Collagen alpha-2(I) chain precursor - Homo sapiens (Human)                                  |
| CO3A1_HUMAN  | Collagen alpha-1(III) chain precursor - Homo sapiens (Human)                                |
| CO4A5_HUMAN  | Collagen alpha-5(IV) chain OS=Homo sapiens GN=COL4A5 PE=1 SV=2                              |
| CO6A1_HUMAN  | Collagen alpha-1(VI) chain precursor - Homo sapiens (Human)                                 |
| CO6A2_HUMAN  | Collagen alpha-2(VI) chain precursor - Homo sapiens (Human)                                 |
| CO6A3_HUMAN  | Collagen alpha-3(VI) chain precursor - Homo sapiens (Human)                                 |
| CSR1_HUMAN   | Cysteine and glycine-rich protein 1 OS=Homo sapiens GN=CSR1 PE=1 SV=3                       |
| CTGF_HUMAN   | Connective tissue growth factor OS=Homo sapiens GN=CTGF PE=1 SV=2                           |
| CYTC_HUMAN   | Cystatin-C OS=Homo sapiens GN=CST3 PE=1 SV=1                                                |
| DCD_HUMAN    | Dermcidin OS=Homo sapiens GN=DCD PE=1 SV=2                                                  |
| DKK3_HUMAN   | Dickkopf-related protein 3 precursor - Homo sapiens (Human)                                 |
| ECM1_HUMAN   | Extracellular matrix protein 1 precursor - Homo sapiens (Human)                             |
| ENOA_HUMAN   | Alpha-enolase - Homo sapiens (Human)                                                        |
| ENOG_HUMAN   | Gamma-enolase - Homo sapiens (Human)                                                        |
| FBLN1_HUMAN  | Fibulin-1 OS=Homo sapiens GN=FBLN1 PE=1 SV=4                                                |
| FBLN3_HUMAN  | EGF-containing fibulin-like extracellular matrix protein 1 precursor - Homo sapiens (Human) |
| FBLN5_HUMAN  | Fibulin-5 OS=Homo sapiens GN=FBLN5 PE=1 SV=1                                                |
| FETA_HUMAN   | Alpha-fetoprotein precursor - Homo sapiens (Human)                                          |
| FETUA_HUMAN  | Alpha-2-HS-glycoprotein precursor - Homo sapiens (Human)                                    |
| FINC_HUMAN   | Fibronectin precursor - Homo sapiens (Human)                                                |
| FKBP1A_HUMAN | Peptidyl-prolyl cis-trans isomerase FKBP1A OS=Homo sapiens GN=FKBP1A PE=1 SV=2              |
| FLNA_HUMAN   | Filamin-A - Homo sapiens (Human)                                                            |
| FSTL1_HUMAN  | Follistatin-related protein 1 precursor - Homo sapiens (Human)                              |
| G3P_HUMAN    | Glyceraldehyde-3-phosphate dehydrogenase - Homo sapiens (Human)                             |
| GELS_HUMAN   | Gelsolin precursor - Homo sapiens (Human)                                                   |
| HS90B_HUMAN  | Heat shock protein HSP 90-beta - Homo sapiens (Human)                                       |
| HSP76_HUMAN  | Heat shock 70 kDa protein 6 - Homo sapiens (Human)                                          |
| HSP7C_HUMAN  | Heat shock cognate 71 kDa protein - Homo sapiens (Human)                                    |
| HYAL4_HUMAN  | Hyaluronidase-4 - Homo sapiens (Human)                                                      |
| IBP4_HUMAN   | Insulin-like growth factor-binding protein 4 OS=Homo sapiens GN=IGFBP4 PE=1 SV=2            |
| IBP5_HUMAN   | Insulin-like growth factor-binding protein 5 precursor - Homo sapiens (Human)               |
| IBP6_HUMAN   | Insulin-like growth factor-binding protein 6 OS=Homo sapiens GN=IGFBP6 PE=1 SV=1            |
| IBP7_HUMAN   | Insulin-like growth factor-binding protein 7 precursor - Homo sapiens (Human)               |
| IC1_HUMAN    | Plasma protease C1 inhibitor precursor - Homo sapiens (Human)                               |
| K1833_HUMAN  | HEAT repeat-containing protein KIAA1833 - Homo sapiens (Human)                              |
| K1C10_HUMAN  | Keratin, type I cytoskeletal 10 - Homo sapiens (Human)                                      |
| K1C13_HUMAN  | Keratin, type I cytoskeletal 13 OS=Homo sapiens GN=KRT13 PE=1 SV=3                          |
| K1C14_HUMAN  | Keratin, type I cytoskeletal 14 OS=Homo sapiens GN=KRT14 PE=1 SV=4                          |
| K1C16_HUMAN  | Keratin, type I cytoskeletal 16 - Homo sapiens (Human)                                      |
| K1C9_HUMAN   | Keratin, type I cytoskeletal 9 - Homo sapiens (Human)                                       |
| K22E_HUMAN   | Keratin, type II cytoskeletal 2 epidermal - Homo sapiens (Human)                            |
| K2C1_HUMAN   | Keratin, type II cytoskeletal 1 OS=Homo sapiens GN=KRT1 PE=1 SV=6                           |
| K2C1B_HUMAN  | Keratin, type II cytoskeletal 1b - Homo sapiens (Human)                                     |

|             |                                                                                                     |
|-------------|-----------------------------------------------------------------------------------------------------|
| K2C5_HUMAN  | Keratin, type II cytoskeletal 5 OS=Homo sapiens GN=KRT5 PE=1 SV=3                                   |
| K2C6A_HUMAN | Keratin, type II cytoskeletal 6A - Homo sapiens (Human)                                             |
| KPYM_HUMAN  | Pyruvate kinase isozymes M1/M2 - Homo sapiens (Human)                                               |
| LAMC1_HUMAN | Laminin subunit gamma-1 precursor - Homo sapiens (Human)                                            |
| LDHA_HUMAN  | L-lactate dehydrogenase A chain - Homo sapiens (Human)                                              |
| LDHB_HUMAN  | L-lactate dehydrogenase B chain - Homo sapiens (Human)                                              |
| LEG1_HUMAN  | Galectin-1 - Homo sapiens (Human)                                                                   |
| LG3BP_HUMAN | Galectin-3-binding protein precursor - Homo sapiens (Human)                                         |
| LMNA_HUMAN  | Lamin-A/C OS=Homo sapiens GN=LMNA PE=1 SV=1                                                         |
| LMOD2_HUMAN | Leiomodin-2 - Homo sapiens (Human)                                                                  |
| LRCC1_HUMAN | Leucine-rich repeat and coiled-coil domain-containing protein 1 - Homo sapiens (Human)              |
| LTB1L_HUMAN | Latent-transforming growth factor beta-binding protein, isoform 1L precursor - Homo sapiens (Human) |
| LTBP2_HUMAN | Latent-transforming growth factor beta-binding protein 2 precursor - Homo sapiens (Human)           |
| LUM_HUMAN   | Lumican precursor - Homo sapiens (Human)                                                            |
| MASP1_HUMAN | Complement-activating component of Ra-reactive factor precursor - Homo sapiens (Human)              |
| MDHM_HUMAN  | Malate dehydrogenase, mitochondrial precursor - Homo sapiens (Human)                                |
| MFAP4_HUMAN | Microfibril-associated glycoprotein 4 precursor - Homo sapiens (Human)                              |
| MIF_HUMAN   | Macrophage migration inhibitory factor - Homo sapiens (Human)                                       |
| MMP1_HUMAN  | Interstitial collagenase precursor - Homo sapiens (Human)                                           |
| MMP2_HUMAN  | 72 kDa type IV collagenase precursor - Homo sapiens (Human)                                         |
| MOES_HUMAN  | Moesin - Homo sapiens (Human)                                                                       |
| MT1A_HUMAN  | Metallothionein-1A OS=Homo sapiens GN=MT1A PE=1 SV=1                                                |
| NDKA_HUMAN  | Nucleoside diphosphate kinase A - Homo sapiens (Human)                                              |
| NUCB1_HUMAN | Nucleobindin-1 precursor - Homo sapiens (Human)                                                     |
| PAI1_HUMAN  | Plasminogen activator inhibitor 1 precursor - Homo sapiens (Human)                                  |
| PCOC1_HUMAN | Procollagen C-endopeptidase enhancer 1 precursor - Homo sapiens (Human)                             |
| PDIA1_HUMAN | Protein disulfide-isomerase precursor - Homo sapiens (Human)                                        |
| PDIA3_HUMAN | Protein disulfide-isomerase A3 precursor - Homo sapiens (Human)                                     |
| PDIA4_HUMAN | Protein disulfide-isomerase A4 precursor - Homo sapiens (Human)                                     |
| PEDF_HUMAN  | Pigment epithelium-derived factor precursor - Homo sapiens (Human)                                  |
| PGK1_HUMAN  | Phosphoglycerate kinase 1 - Homo sapiens (Human)                                                    |
| PGS2_HUMAN  | Decorin precursor - Homo sapiens (Human)                                                            |
| PKHG1_HUMAN | Pleckstrin homology domain-containing family G member 1 OS=Homo sapiens GN=PLEKHG1 PE=1 SV=2        |
| PLTP_HUMAN  | Phospholipid transfer protein precursor - Homo sapiens (Human)                                      |
| PPIA_HUMAN  | Peptidyl-prolyl cis-trans isomerase A - Homo sapiens (Human)                                        |
| PPIB_HUMAN  | Peptidyl-prolyl cis-trans isomerase B precursor - Homo sapiens (Human)                              |
| PROF1_HUMAN | Profilin-1 OS=Homo sapiens GN=PFN1 PE=1 SV=2                                                        |
| PTGDS_HUMAN | Prostaglandin-H2 D-isomerase precursor - Homo sapiens (Human)                                       |
| PTPRB_HUMAN | Receptor-type tyrosine-protein phosphatase beta OS=Homo sapiens GN=PTPRB PE=1 SV=1                  |
| PXDN_HUMAN  | Peroxidasin homolog precursor - Homo sapiens (Human)                                                |
| QSOX1_HUMAN | Sulfhydryl oxidase 1 precursor - Homo sapiens (Human)                                               |
| RARR2_HUMAN | Retinoic acid receptor responder protein 2 OS=Homo sapiens GN=RARRES2 PE=1 SV=1                     |
| RNAS4_HUMAN | Ribonuclease 4 OS=Homo sapiens GN=RNASE4 PE=1 SV=3                                                  |
| RPGF3_HUMAN | Rap guanine nucleotide exchange factor 3 - Homo sapiens (Human)                                     |
| S10A6_HUMAN | Protein S100-A6 - Homo sapiens (Human)                                                              |
| SEM3A_HUMAN | Semaphorin-3A precursor - Homo sapiens (Human)                                                      |
| SPON2_HUMAN | Spondin-2 precursor - Homo sapiens (Human)                                                          |
| SPRC_HUMAN  | SPARC precursor - Homo sapiens (Human)                                                              |
| STC1_HUMAN  | Stanniocalcin-1 OS=Homo sapiens GN=STC1 PE=1 SV=1                                                   |
| TCEA3_HUMAN | Transcription elongation factor A protein 3 - Homo sapiens (Human)                                  |

|             |                                                                |
|-------------|----------------------------------------------------------------|
| TETN_HUMAN  | Tetranectin OS=Homo sapiens GN=CLEC3B PE=1 SV=2                |
| THBG_HUMAN  | Thyroxine-binding globulin precursor - Homo sapiens (Human)    |
| TIMP1_HUMAN | Metalloproteinase inhibitor 1 precursor - Homo sapiens (Human) |
| TIMP2_HUMAN | Metalloproteinase inhibitor 2 precursor - Homo sapiens (Human) |
| TPIS_HUMAN  | Triosephosphate isomerase - Homo sapiens (Human)               |
| TSP1_HUMAN  | Thrombospondin-1 precursor - Homo sapiens (Human)              |
| TYB10_HUMAN | Thymosin beta-10 OS=Homo sapiens GN=TMSB10 PE=1 SV=2           |
| UBE4B_HUMAN | Ubiquitin conjugation factor E4 B - Homo sapiens (Human)       |
| UBIQ_HUMAN  | Ubiquitin OS=Homo sapiens GN=RPS27A PE=1 SV=1                  |
| VASN_HUMAN  | Vasorin precursor - Homo sapiens (Human)                       |
| VIME_HUMAN  | Vimentin - Homo sapiens (Human)                                |
| VINC_HUMAN  | Vinculin - Homo sapiens (Human)                                |
| WDR87_HUMAN | WD repeat-containing protein 87 - Homo sapiens (Human)         |

| SMC         |                                                                                                                        |
|-------------|------------------------------------------------------------------------------------------------------------------------|
| Symbol      | Name                                                                                                                   |
| 1433B_HUMAN | 14-3-3 protein beta/alpha OS=Homo sapiens GN=YWHAB PE=1 SV=3                                                           |
| 1433E_HUMAN | 14-3-3 protein epsilon OS=Homo sapiens GN=YWHAE PE=1 SV=1                                                              |
| 1433F_HUMAN | 14-3-3 protein eta OS=Homo sapiens GN=YWHAH PE=1 SV=4                                                                  |
| 1433G_HUMAN | 14-3-3 protein gamma OS=Homo sapiens GN=YWHAG PE=1 SV=2                                                                |
| 1433T_HUMAN | 14-3-3 protein theta OS=Homo sapiens GN=YWHAQ PE=1 SV=1                                                                |
| 1433Z_HUMAN | 14-3-3 protein zeta/delta OS=Homo sapiens GN=YWHAZ PE=1 SV=1                                                           |
| 1A01_HUMAN  | HLA class I histocompatibility antigen, A-1 alpha chain OS=Homo sapiens GN=HLA-A PE=1 SV=1                             |
| 2AAA_HUMAN  | Serine/threonine-protein phosphatase 2A 65 kDa regulatory subunit A alpha isoform OS=Homo sapiens GN=PPP2R1A PE=1 SV=4 |
| A1AT_HUMAN  | Alpha-1-antitrypsin OS=Homo sapiens GN=SERPINA1 PE=1 SV=3                                                              |
| A2AP_HUMAN  | Alpha-2-antiplasmin OS=Homo sapiens GN=SERPINF2 PE=1 SV=3                                                              |
| A2MG_HUMAN  | Alpha-2-macroglobulin OS=Homo sapiens GN=A2M PE=1 SV=1                                                                 |
| A4_HUMAN    | Amyloid beta A4 protein OS=Homo sapiens GN=APP PE=1 SV=3                                                               |
| ACTB_HUMAN  | Actin, cytoplasmic 1 OS=Homo sapiens GN=ACTB PE=1 SV=1                                                                 |
| ACTN4_HUMAN | Alpha-actinin-4 OS=Homo sapiens GN=ACTN4 PE=1 SV=2                                                                     |
| ADA10_HUMAN | Disintegrin and metalloproteinase domain-containing protein 10 OS=Homo sapiens GN=ADAM10 PE=1 SV=1                     |
| ADAM9_HUMAN | Disintegrin and metalloproteinase domain-containing protein 9 OS=Homo sapiens GN=ADAM9 PE=1 SV=1                       |
| ADK_HUMAN   | Adenosine kinase OS=Homo sapiens GN=ADK PE=1 SV=2                                                                      |
| ADML_HUMAN  | ADM OS=Homo sapiens GN=ADM PE=1 SV=1                                                                                   |
| AEBP1_HUMAN | Adipocyte enhancer-binding protein 1 OS=Homo sapiens GN=AEBP1 PE=1 SV=1                                                |
| AGRN_HUMAN  | Agrin OS=Homo sapiens GN=AGRN PE=1 SV=4                                                                                |
| AHNK_HUMAN  | Neuroblast differentiation-associated protein AHNAK OS=Homo sapiens GN=AHNAK PE=1 SV=2                                 |
| ALBU_HUMAN  | Serum albumin OS=Homo sapiens GN=ALB PE=1 SV=2                                                                         |
| ALDOA_HUMAN | Fructose-bisphosphate aldolase A OS=Homo sapiens GN=ALDOA PE=1 SV=2                                                    |
| AMD_HUMAN   | Peptidyl-glycine alpha-amidating monoxygenase OS=Homo sapiens GN=PAM PE=1 SV=2                                         |
| AMPD3_HUMAN | AMP deaminase 3 OS=Homo sapiens GN=AMPD3 PE=1 SV=1                                                                     |
| ANG1_HUMAN  | Angiogenin OS=Homo sapiens GN=ANG PE=1 SV=1                                                                            |
| ANGL2_HUMAN | Angiopoietin-related protein 2 OS=Homo sapiens GN=ANGPTL2 PE=2 SV=1                                                    |
| ANKS3_HUMAN | Ankyrin repeat and SAM domain-containing protein 3 OS=Homo sapiens GN=ANKS3 PE=1 SV=1                                  |
| ANT3_HUMAN  | Antithrombin-III OS=Homo sapiens GN=SERPINC1 PE=1 SV=1                                                                 |
| ANX11_HUMAN | Annexin A11 OS=Homo sapiens GN=ANXA11 PE=1 SV=1                                                                        |
| ANXA1_HUMAN | Annexin A1 OS=Homo sapiens GN=ANXA1 PE=1 SV=2                                                                          |
| ANXA2_HUMAN | Annexin A2 OS=Homo sapiens GN=ANXA2 PE=1 SV=2                                                                          |
| ANXA5_HUMAN | Annexin A5 OS=Homo sapiens GN=ANXA5 PE=1 SV=2                                                                          |
| APLP2_HUMAN | Amyloid-like protein 2 OS=Homo sapiens GN=APLP2 PE=1 SV=2                                                              |

|              |                                                                                                       |
|--------------|-------------------------------------------------------------------------------------------------------|
| APOA1_HUMAN  | Apolipoprotein A-I OS=Homo sapiens GN=APOA1 PE=1 SV=1                                                 |
| APOB_HUMAN   | Apolipoprotein B-100 OS=Homo sapiens GN=APOB PE=1 SV=1                                                |
| APOD_HUMAN   | Apolipoprotein D OS=Homo sapiens GN=APOD PE=1 SV=1                                                    |
| ARHG1_HUMAN  | Rho guanine nucleotide exchange factor 18 OS=Homo sapiens GN=ARHGEF18 PE=1 SV=2                       |
| ARL5C_HUMAN  | Putative ADP-ribosylation factor-like protein 5C OS=Homo sapiens GN=ARL5C PE=2 SV=4                   |
| AT10A_HUMAN  | Probable phospholipid-transporting ATPase VA OS=Homo sapiens GN=ATP10A PE=2 SV=2                      |
| ATS5_HUMAN   | A disintegrin and metalloproteinase with thrombospondin motifs 5 OS=Homo sapiens GN=ADAMTS5 PE=1 SV=1 |
| B2MG_HUMAN   | Beta-2-microglobulin OS=Homo sapiens GN=B2M PE=1 SV=1                                                 |
| B3GN1_HUMAN  | N-acetyllactosaminide beta-1,3-N-acetylglucosaminyltransferase OS=Homo sapiens GN=B3GNT1 PE=1 SV=1    |
| B4GT1_HUMAN  | Beta-1,4-galactosyltransferase 1 OS=Homo sapiens GN=B4GALT1 PE=1 SV=5                                 |
| B4GT5_HUMAN  | Beta-1,4-galactosyltransferase 5 OS=Homo sapiens GN=B4GALT5 PE=2 SV=1                                 |
| BGH3_HUMAN   | Transforming growth factor-beta-induced protein ig-h3 OS=Homo sapiens GN=TGFB1 PE=1 SV=1              |
| BMP1_HUMAN   | Bone morphogenetic protein 1 OS=Homo sapiens GN=BMP1 PE=1 SV=2                                        |
| BST1_HUMAN   | ADP-ribosyl cyclase 2 OS=Homo sapiens GN=BST1 PE=1 SV=2                                               |
| BTD_HUMAN    | Biotinidase OS=Homo sapiens GN=BTD PE=1 SV=2                                                          |
| C1R_HUMAN    | Complement C1r subcomponent OS=Homo sapiens GN=C1R PE=1 SV=2                                          |
| C1S_HUMAN    | Complement C1s subcomponent OS=Homo sapiens GN=C1S PE=1 SV=1                                          |
| CAB45_HUMAN  | 45 kDa calcium-binding protein OS=Homo sapiens GN=SDF4 PE=1 SV=1                                      |
| CAC1S_HUMAN  | Voltage-dependent L-type calcium channel subunit alpha-1S OS=Homo sapiens GN=CACNA1S PE=1 SV=4        |
| CAD11_HUMAN  | Cadherin-11 OS=Homo sapiens GN=CDH11 PE=1 SV=2                                                        |
| CALR_HUMAN   | Calreticulin OS=Homo sapiens GN=CALR PE=1 SV=1                                                        |
| CALU_HUMAN   | Calumenin OS=Homo sapiens GN=CALU PE=1 SV=2                                                           |
| CAN2_HUMAN   | Calpain-2 catalytic subunit OS=Homo sapiens GN=CAPN2 PE=1 SV=5                                        |
| CATB_HUMAN   | Cathepsin B OS=Homo sapiens GN=CTSB PE=1 SV=3                                                         |
| CATL1_HUMAN  | Cathepsin L1 OS=Homo sapiens GN=CTSL1 PE=1 SV=2                                                       |
| CBR1_HUMAN   | Carbonyl reductase [NADPH] 1 OS=Homo sapiens GN=CBR1 PE=1 SV=3                                        |
| CCBE1_HUMAN  | Collagen and calcium-binding EGF domain-containing protein 1 OS=Homo sapiens GN=CCBE1 PE=2 SV=1       |
| CCD37_HUMAN  | Coiled-coil domain-containing protein 37 OS=Homo sapiens GN=CCDC37 PE=1 SV=1                          |
| CD109_HUMAN  | CD109 antigen OS=Homo sapiens GN=CD109 PE=1 SV=2                                                      |
| CD248_HUMAN  | Endosialin OS=Homo sapiens GN=CD248 PE=1 SV=1                                                         |
| CD44_HUMAN   | CD44 antigen OS=Homo sapiens GN=CD44 PE=1 SV=2                                                        |
| CD59_HUMAN   | CD59 glycoprotein OS=Homo sapiens GN=CD59 PE=1 SV=1                                                   |
| CF115_HUMAN  | UPF0727 protein C6orf115 OS=Homo sapiens GN=C6orf115 PE=1 SV=1                                        |
| CFAD_HUMAN   | Complement factor D OS=Homo sapiens GN=CFD PE=1 SV=5                                                  |
| CFAH_HUMAN   | Complement factor H OS=Homo sapiens GN=CFH PE=1 SV=4                                                  |
| CHI3L1_HUMAN | Chitinase-3-like protein 1 OS=Homo sapiens GN=CHI3L1 PE=1 SV=2                                        |
| CHD1L_HUMAN  | Chromodomain-helicase-DNA-binding protein 1-like OS=Homo sapiens GN=CHD1L PE=1 SV=1                   |
| CHID1_HUMAN  | Chitinase domain-containing protein 1 OS=Homo sapiens GN=CHID1 PE=1 SV=1                              |
| CHM4A_HUMAN  | Charged multivesicular body protein 4a OS=Homo sapiens GN=CHMP4A PE=1 SV=3                            |
| CHM4B_HUMAN  | Charged multivesicular body protein 4b OS=Homo sapiens GN=CHMP4B PE=1 SV=1                            |
| CHST2_HUMAN  | Carbohydrate sulfotransferase 2 OS=Homo sapiens GN=CHST2 PE=1 SV=2                                    |
| CI051_HUMAN  | Putative SIPAR-like protein C9orf51 OS=Homo sapiens GN=C9orf51 PE=5 SV=1                              |
| CI057_HUMAN  | Uncharacterized protein C9orf57 OS=Homo sapiens GN=C9orf57 PE=2 SV=1                                  |
| CLC11_HUMAN  | C-type lectin domain family 11 member A OS=Homo sapiens GN=CLEC11A PE=1 SV=1                          |
| CLIC4_HUMAN  | Chloride intracellular channel protein 4 OS=Homo sapiens GN=CLIC4 PE=1 SV=4                           |
| CLUS_HUMAN   | Clusterin OS=Homo sapiens GN=CLU PE=1 SV=1                                                            |
| CNBP_HUMAN   | Cellular nucleic acid-binding protein OS=Homo sapiens GN=CNBP PE=1 SV=1                               |
| CO1A1_HUMAN  | Collagen alpha-1(I) chain OS=Homo sapiens GN=COL1A1 PE=1 SV=4                                         |
| CO1A2_HUMAN  | Collagen alpha-2(I) chain OS=Homo sapiens GN=COL1A2 PE=1 SV=6                                         |
| CO3_HUMAN    | Complement C3 OS=Homo sapiens GN=C3 PE=1 SV=2                                                         |

|             |                                                                                                     |
|-------------|-----------------------------------------------------------------------------------------------------|
| CO3A1_HUMAN | Collagen alpha-1(III) chain OS=Homo sapiens GN=COL3A1 PE=1 SV=4                                     |
| CO4A_HUMAN  | Complement C4-A OS=Homo sapiens GN=C4A PE=1 SV=1                                                    |
| CO4A5_HUMAN | Collagen alpha-5(IV) chain OS=Homo sapiens GN=COL4A5 PE=1 SV=2                                      |
| CO5A1_HUMAN | Collagen alpha-1(V) chain OS=Homo sapiens GN=COL5A1 PE=1 SV=3                                       |
| CO5A2_HUMAN | Collagen alpha-2(V) chain OS=Homo sapiens GN=COL5A2 PE=1 SV=3                                       |
| CO6A1_HUMAN | Collagen alpha-1(VI) chain OS=Homo sapiens GN=COL6A1 PE=1 SV=3                                      |
| CO6A2_HUMAN | Collagen alpha-2(VI) chain OS=Homo sapiens GN=COL6A2 PE=1 SV=4                                      |
| CO6A3_HUMAN | Collagen alpha-3(VI) chain OS=Homo sapiens GN=COL6A3 PE=1 SV=4                                      |
| CO7A1_HUMAN | Collagen alpha-1(VII) chain OS=Homo sapiens GN=COL7A1 PE=1 SV=2                                     |
| CO9_HUMAN   | Complement component C9 OS=Homo sapiens GN=C9 PE=1 SV=2                                             |
| COCA1_HUMAN | Collagen alpha-1(XII) chain OS=Homo sapiens GN=COL12A1 PE=1 SV=2                                    |
| COF1_HUMAN  | Cofilin-1 OS=Homo sapiens GN=CFL1 PE=1 SV=3                                                         |
| COFA1_HUMAN | Collagen alpha-1(XV) chain OS=Homo sapiens GN=COL15A1 PE=1 SV=2                                     |
| COIA1_HUMAN | Collagen alpha-1(XVIII) chain OS=Homo sapiens GN=COL18A1 PE=1 SV=5                                  |
| COR1C_HUMAN | Coronin-1C OS=Homo sapiens GN=CORO1C PE=1 SV=1                                                      |
| CQ080_HUMAN | Uncharacterized protein C17orf80 OS=Homo sapiens GN=C17orf80 PE=1 SV=1                              |
| CSF1_HUMAN  | Macrophage colony-stimulating factor 1 OS=Homo sapiens GN=CSF1 PE=1 SV=1                            |
| CSPG2_HUMAN | Versican core protein OS=Homo sapiens GN=VCAN PE=1 SV=3                                             |
| CSRP1_HUMAN | Cysteine and glycine-rich protein 1 OS=Homo sapiens GN=CSRP1 PE=1 SV=3                              |
| CSTN1_HUMAN | Calsyntenin-1 OS=Homo sapiens GN=CLSTN1 PE=1 SV=1                                                   |
| CYTC_HUMAN  | Cystatin-C OS=Homo sapiens GN=CST3 PE=1 SV=1                                                        |
| DAG1_HUMAN  | Dystroglycan OS=Homo sapiens GN=DAG1 PE=1 SV=2                                                      |
| DERM_HUMAN  | Dermatopontin OS=Homo sapiens GN=DPT PE=2 SV=2                                                      |
| DKK3_HUMAN  | Dickkopf-related protein 3 OS=Homo sapiens GN=DKK3 PE=1 SV=1                                        |
| DOCK3_HUMAN | Dedicator of cytokinesis protein 3 OS=Homo sapiens GN=DOCK3 PE=1 SV=1                               |
| DPOLA_HUMAN | DNA polymerase alpha catalytic subunit OS=Homo sapiens GN=POLA1 PE=1 SV=2                           |
| E41L5_HUMAN | Band 4.1-like protein 5 OS=Homo sapiens GN=EPB41L5 PE=1 SV=3                                        |
| ECM1_HUMAN  | Extracellular matrix protein 1 OS=Homo sapiens GN=ECM1 PE=1 SV=2                                    |
| EF1B_HUMAN  | Elongation factor 1-beta OS=Homo sapiens GN=EEF1B2 PE=1 SV=3                                        |
| EF2_HUMAN   | Elongation factor 2 OS=Homo sapiens GN=EEF2 PE=1 SV=4                                               |
| EMIL1_HUMAN | EMILIN-1 OS=Homo sapiens GN=EMILIN1 PE=1 SV=2                                                       |
| ENOA_HUMAN  | Alpha-enolase OS=Homo sapiens GN=ENO1 PE=1 SV=2                                                     |
| ENPP2_HUMAN | Ectonucleotide pyrophosphatase/phosphodiesterase family member 2 OS=Homo sapiens GN=ENPP2 PE=1 SV=2 |
| ENTP6_HUMAN | Ectonucleoside triphosphate diphosphohydrolase 6 OS=Homo sapiens GN=ENTPD6 PE=1 SV=2                |
| EXT1_HUMAN  | Exostosin-1 OS=Homo sapiens GN=EXT1 PE=1 SV=2                                                       |
| F180A_HUMAN | Protein FAM180A OS=Homo sapiens GN=FAM180A PE=2 SV=1                                                |
| FAM3C_HUMAN | Protein FAM3C OS=Homo sapiens GN=FAM3C PE=1 SV=1                                                    |
| FAS_HUMAN   | Fatty acid synthase OS=Homo sapiens GN=FASN PE=1 SV=2                                               |
| FBLN1_HUMAN | Fibulin-1 OS=Homo sapiens GN=FBLN1 PE=1 SV=4                                                        |
| FBLN2_HUMAN | Fibulin-2 OS=Homo sapiens GN=FBLN2 PE=1 SV=2                                                        |
| FBLN3_HUMAN | EGF-containing fibulin-like extracellular matrix protein 1 OS=Homo sapiens GN=EFEMP1 PE=1 SV=2      |
| FBLN4_HUMAN | EGF-containing fibulin-like extracellular matrix protein 2 OS=Homo sapiens GN=EFEMP2 PE=1 SV=3      |
| FBLN5_HUMAN | Fibulin-5 OS=Homo sapiens GN=FBLN5 PE=1 SV=1                                                        |
| FBN1_HUMAN  | Fibrillin-1 OS=Homo sapiens GN=FBN1 PE=1 SV=2                                                       |
| FBN2_HUMAN  | Fibrillin-2 OS=Homo sapiens GN=FBN2 PE=1 SV=3                                                       |
| FEM1B_HUMAN | Protein fem-1 homolog B OS=Homo sapiens GN=FEM1B PE=1 SV=1                                          |
| FETA_HUMAN  | Alpha-fetoprotein OS=Homo sapiens GN=AFP PE=1 SV=1                                                  |
| FETUA_HUMAN | Alpha-2-HS-glycoprotein OS=Homo sapiens GN=AHSG PE=1 SV=1                                           |
| FINC_HUMAN  | Fibronectin OS=Homo sapiens GN=FN1 PE=1 SV=3                                                        |
| FLNA_HUMAN  | Filamin-A OS=Homo sapiens GN=FLNA PE=1 SV=4                                                         |

|               |                                                                                                     |
|---------------|-----------------------------------------------------------------------------------------------------|
| FLNC_HUMAN    | Filamin-C OS=Homo sapiens GN=FLNC PE=1 SV=3                                                         |
| FPGT_HUMAN    | Fucose-1-phosphate guanylyltransferase OS=Homo sapiens GN=FPGT PE=1 SV=2                            |
| FSCN1_HUMAN   | Fascin OS=Homo sapiens GN=FSCN1 PE=1 SV=3                                                           |
| FST_HUMAN     | Follistatin OS=Homo sapiens GN=FST PE=1 SV=2                                                        |
| FSTL1_HUMAN   | Follistatin-related protein 1 OS=Homo sapiens GN=FSTL1 PE=1 SV=1                                    |
| FUCA2_HUMAN   | Plasma alpha-L-fucosidase OS=Homo sapiens GN=FUCA2 PE=1 SV=2                                        |
| G3P_HUMAN     | Glyceraldehyde-3-phosphate dehydrogenase OS=Homo sapiens GN=GAPDH PE=1 SV=3                         |
| G3ST1_HUMAN   | Galactosylceramide sulfotransferase OS=Homo sapiens GN=GAL3ST1 PE=1 SV=1                            |
| G6PI_HUMAN    | Glucose-6-phosphate isomerase OS=Homo sapiens GN=GPI PE=1 SV=4                                      |
| GA2L3_HUMAN   | GAS2-like protein 3 OS=Homo sapiens GN=GAS2L3 PE=1 SV=1                                             |
| GALT2_HUMAN   | Polypeptide N-acetylgalactosaminyltransferase 2 OS=Homo sapiens GN=GALNT2 PE=1 SV=1                 |
| GALT5_HUMAN   | Polypeptide N-acetylgalactosaminyltransferase 5 OS=Homo sapiens GN=GALNT5 PE=1 SV=1                 |
| GDIB_HUMAN    | Rab GDP dissociation inhibitor beta OS=Homo sapiens GN=GDID2 PE=1 SV=2                              |
| GDN_HUMAN     | Glia-derived nexin OS=Homo sapiens GN=SERPINE2 PE=1 SV=1                                            |
| GELS_HUMAN    | Gelsolin OS=Homo sapiens GN=GSN PE=1 SV=1                                                           |
| GEM15_HUMAN   | Gem-associated protein 5 OS=Homo sapiens GN=GEMIN5 PE=1 SV=2                                        |
| GLCM_HUMAN    | Glucosylceramidase OS=Homo sapiens GN=GBA PE=1 SV=3                                                 |
| GNPTG_HUMAN   | N-acetylglucosamine-1-phosphotransferase subunit gamma OS=Homo sapiens GN=GNPTG PE=1 SV=1           |
| GP119_HUMAN   | Glucose-dependent insulinotropic receptor OS=Homo sapiens GN=GPR119 PE=1 SV=1                       |
| GPC1_HUMAN    | Glypican-1 OS=Homo sapiens GN=GPC1 PE=1 SV=1                                                        |
| GREM1_HUMAN   | Gremlin-1 OS=Homo sapiens GN=GREM1 PE=1 SV=1                                                        |
| GSCR1_HUMAN   | Glioma tumor suppressor candidate region gene 1 protein OS=Homo sapiens GN=GLTSCR1 PE=1 SV=2        |
| GSTP1_HUMAN   | Glutathione S-transferase P OS=Homo sapiens GN=GSTP1 PE=1 SV=2                                      |
| GTPB1_HUMAN   | GTP-binding protein 1 OS=Homo sapiens GN=GTPBP1 PE=1 SV=3                                           |
| H2A1B_HUMAN   | Histone H2A type 1-B/E OS=Homo sapiens GN=HIST1H2AB PE=1 SV=2                                       |
| H4_HUMAN      | Histone H4 OS=Homo sapiens GN=HIST1H4A PE=1 SV=2                                                    |
| HBA_HUMAN     | Hemoglobin subunit alpha OS=Homo sapiens GN=HBA1 PE=1 SV=2                                          |
| HBB_HUMAN     | Hemoglobin subunit beta OS=Homo sapiens GN=HBB PE=1 SV=2                                            |
| HGF_HUMAN     | Hepatocyte growth factor OS=Homo sapiens GN=HGF PE=1 SV=2                                           |
| HLA_E_HUMAN   | HLA class I histocompatibility antigen, alpha chain E OS=Homo sapiens GN=HLA-E PE=1 SV=3            |
| HNRNP_F_HUMAN | Heterogeneous nuclear ribonucleoprotein F OS=Homo sapiens GN=HNRNPF PE=1 SV=3                       |
| HS90A_HUMAN   | Heat shock protein HSP 90-alpha OS=Homo sapiens GN=HSP90AA1 PE=1 SV=5                               |
| HSP7C_HUMAN   | Heat shock cognate 71 kDa protein OS=Homo sapiens GN=HSPA8 PE=1 SV=1                                |
| HTRA1_HUMAN   | Serine protease HTRA1 OS=Homo sapiens GN=HTRA1 PE=1 SV=1                                            |
| IBP2_HUMAN    | Insulin-like growth factor-binding protein 2 OS=Homo sapiens GN=IGFBP2 PE=1 SV=1                    |
| IBP3_HUMAN    | Insulin-like growth factor-binding protein 3 OS=Homo sapiens GN=IGFBP3 PE=1 SV=2                    |
| IBP4_HUMAN    | Insulin-like growth factor-binding protein 4 OS=Homo sapiens GN=IGFBP4 PE=1 SV=2                    |
| IBP5_HUMAN    | Insulin-like growth factor-binding protein 5 OS=Homo sapiens GN=IGFBP5 PE=1 SV=1                    |
| IBP6_HUMAN    | Insulin-like growth factor-binding protein 6 OS=Homo sapiens GN=IGFBP6 PE=1 SV=1                    |
| IBP7_HUMAN    | Insulin-like growth factor-binding protein 7 OS=Homo sapiens GN=IGFBP7 PE=1 SV=1                    |
| IC1_HUMAN     | Plasma protease C1 inhibitor OS=Homo sapiens GN=SERPING1 PE=1 SV=2                                  |
| IGF2_HUMAN    | Insulin-like growth factor II OS=Homo sapiens GN=IGF2 PE=1 SV=1                                     |
| IGSF1_HUMAN   | Immunoglobulin superfamily member 1 OS=Homo sapiens GN=IGSF1 PE=1 SV=3                              |
| IMB1_HUMAN    | Importin subunit beta-1 OS=Homo sapiens GN=KPNB1 PE=1 SV=2                                          |
| ISLR_HUMAN    | Immunoglobulin superfamily containing leucine-rich repeat protein OS=Homo sapiens GN=ISLR PE=1 SV=1 |
| ITB4_HUMAN    | Integrin beta-4 OS=Homo sapiens GN=ITGB4 PE=1 SV=4                                                  |
| ITGBL_HUMAN   | Integrin beta-like protein 1 OS=Homo sapiens GN=ITGBL1 PE=2 SV=1                                    |
| ITIH2_HUMAN   | Inter-alpha-trypsin inhibitor heavy chain H2 OS=Homo sapiens GN=ITIH2 PE=1 SV=2                     |
| ITIH4_HUMAN   | Inter-alpha-trypsin inhibitor heavy chain H4 OS=Homo sapiens GN=ITIH4 PE=1 SV=4                     |
| K1C10_HUMAN   | Keratin, type I cytoskeletal 10 OS=Homo sapiens GN=KRT10 PE=1 SV=5                                  |

|             |                                                                                                              |
|-------------|--------------------------------------------------------------------------------------------------------------|
| K1C9_HUMAN  | Keratin, type I cytoskeletal 9 OS=Homo sapiens GN=KRT9 PE=1 SV=3                                             |
| K22E_HUMAN  | Keratin, type II cytoskeletal 2 epidermal OS=Homo sapiens GN=KRT2 PE=1 SV=2                                  |
| K2C1_HUMAN  | Keratin, type II cytoskeletal 1 OS=Homo sapiens GN=KRT1 PE=1 SV=6                                            |
| K2C1B_HUMAN | Keratin, type II cytoskeletal 1b OS=Homo sapiens GN=KRT77 PE=1 SV=2                                          |
| K2C4_HUMAN  | Keratin, type II cytoskeletal 4 OS=Homo sapiens GN=KRT4 PE=1 SV=4                                            |
| K2C6B_HUMAN | Keratin, type II cytoskeletal 6B OS=Homo sapiens GN=KRT6B PE=1 SV=5                                          |
| K2C73_HUMAN | Keratin, type II cytoskeletal 73 OS=Homo sapiens GN=KRT73 PE=1 SV=1                                          |
| K2C8_HUMAN  | Keratin, type II cytoskeletal 8 OS=Homo sapiens GN=KRT8 PE=1 SV=7                                            |
| KANK2_HUMAN | KN motif and ankyrin repeat domain-containing protein 2 OS=Homo sapiens GN=KANK2 PE=1 SV=1                   |
| KIF3C_HUMAN | Kinesin-like protein KIF3C OS=Homo sapiens GN=KIF3C PE=1 SV=2                                                |
| KRT82_HUMAN | Keratin, type II cuticular Hb2 OS=Homo sapiens GN=KRT82 PE=1 SV=3                                            |
| LAMA2_HUMAN | Laminin subunit alpha-2 OS=Homo sapiens GN=LAMA2 PE=1 SV=4                                                   |
| LAMA4_HUMAN | Laminin subunit alpha-4 OS=Homo sapiens GN=LAMA4 PE=1 SV=3                                                   |
| LAMA5_HUMAN | Laminin subunit alpha-5 OS=Homo sapiens GN=LAMA5 PE=1 SV=7                                                   |
| LAMB1_HUMAN | Laminin subunit beta-1 OS=Homo sapiens GN=LAMB1 PE=1 SV=1                                                    |
| LAMB2_HUMAN | Laminin subunit beta-2 OS=Homo sapiens GN=LAMB2 PE=1 SV=2                                                    |
| LAMC1_HUMAN | Laminin subunit gamma-1 OS=Homo sapiens GN=LAMC1 PE=1 SV=3                                                   |
| LASP1_HUMAN | LIM and SH3 domain protein 1 OS=Homo sapiens GN=LASP1 PE=1 SV=2                                              |
| LDHA_HUMAN  | L-lactate dehydrogenase A chain OS=Homo sapiens GN=LDHA PE=1 SV=2                                            |
| LDHB_HUMAN  | L-lactate dehydrogenase B chain OS=Homo sapiens GN=LDHB PE=1 SV=2                                            |
| LDLR_HUMAN  | Low-density lipoprotein receptor OS=Homo sapiens GN=LDLR PE=1 SV=1                                           |
| LEG1_HUMAN  | Galectin-1 OS=Homo sapiens GN=LGALS1 PE=1 SV=2                                                               |
| LG3BP_HUMAN | Galectin-3-binding protein OS=Homo sapiens GN=LGALS3BP PE=1 SV=1                                             |
| LMNA_HUMAN  | Lamin A/C OS=Homo sapiens GN=LMNA PE=1 SV=1                                                                  |
| LMOD2_HUMAN | Leiomodin-2 OS=Homo sapiens GN=LMOD2 PE=2 SV=2                                                               |
| LOXL1_HUMAN | Lysyl oxidase homolog 1 OS=Homo sapiens GN=LOXL1 PE=2 SV=2                                                   |
| LOXL2_HUMAN | Lysyl oxidase homolog 2 OS=Homo sapiens GN=LOXL2 PE=1 SV=1                                                   |
| LRP1_HUMAN  | Prolow-density lipoprotein receptor-related protein 1 OS=Homo sapiens GN=LRP1 PE=1 SV=1                      |
| LTBP1_HUMAN | Latent-transforming growth factor beta-binding protein 1 OS=Homo sapiens GN=LTBP1 PE=1 SV=3                  |
| LTBP2_HUMAN | Latent-transforming growth factor beta-binding protein 2 OS=Homo sapiens GN=LTBP2 PE=1 SV=2                  |
| LTBP4_HUMAN | Latent-transforming growth factor beta-binding protein 4 OS=Homo sapiens GN=LTBP4 PE=1 SV=2                  |
| LUM_HUMAN   | Lumican OS=Homo sapiens GN=LUM PE=1 SV=2                                                                     |
| LYAG_HUMAN  | Lysosomal alpha-glucosidase OS=Homo sapiens GN=GAA PE=1 SV=3                                                 |
| LYOX_HUMAN  | Protein-lysine 6-oxidase OS=Homo sapiens GN=LOX PE=1 SV=2                                                    |
| MA1A1_HUMAN | Mannosyl-oligosaccharide 1,2-alpha-mannosidase IA OS=Homo sapiens GN=MAN1A1 PE=1 SV=3                        |
| MA2A1_HUMAN | Alpha-mannosidase 2 OS=Homo sapiens GN=MAN2A1 PE=1 SV=2                                                      |
| MASP1_HUMAN | Mannan-binding lectin serine protease 1 OS=Homo sapiens GN=MASP1 PE=1 SV=3                                   |
| MDHM_HUMAN  | Malate dehydrogenase, mitochondrial OS=Homo sapiens GN=MDH2 PE=1 SV=3                                        |
| MFAP2_HUMAN | Microfibrillar-associated protein 2 OS=Homo sapiens GN=MFAP2 PE=2 SV=1                                       |
| MFAP4_HUMAN | Microfibrillar-associated glycoprotein 4 OS=Homo sapiens GN=MFAP4 PE=1 SV=2                                  |
| MFGM_HUMAN  | Lactadherin OS=Homo sapiens GN=MFG8 PE=1 SV=2                                                                |
| MGT4B_HUMAN | Alpha-1,3-mannosyl-glycoprotein 4-beta-N-acetylglucosaminyltransferase B OS=Homo sapiens GN=MGAT4B PE=1 SV=1 |
| MIF_HUMAN   | Macrophage migration inhibitory factor OS=Homo sapiens GN=MIF PE=1 SV=4                                      |
| MIME_HUMAN  | Mimectan OS=Homo sapiens GN=OGN PE=1 SV=1                                                                    |
| MINP1_HUMAN | Multiple inositol polyphosphate phosphatase 1 OS=Homo sapiens GN=MINPP1 PE=1 SV=1                            |
| MMP19_HUMAN | Matrix metalloproteinase-19 OS=Homo sapiens GN=MMP19 PE=1 SV=1                                               |
| MMP2_HUMAN  | 72 kDa type IV collagenase OS=Homo sapiens GN=MMP2 PE=1 SV=2                                                 |
| MRC2_HUMAN  | C-type mannose receptor 2 OS=Homo sapiens GN=MRC2 PE=1 SV=1                                                  |
| MT1G_HUMAN  | Metallothionein-1G OS=Homo sapiens GN=MT1G PE=1 SV=2                                                         |
| MXRA5_HUMAN | Matrix-remodeling-associated protein 5 OS=Homo sapiens GN=MXRA5 PE=2 SV=2                                    |

|             |                                                                                                         |
|-------------|---------------------------------------------------------------------------------------------------------|
| MYH9_HUMAN  | Myosin-9 OS=Homo sapiens GN=MYH9 PE=1 SV=4                                                              |
| MYLK_HUMAN  | Myosin light chain kinase, smooth muscle OS=Homo sapiens GN=MYLK PE=1 SV=3                              |
| NAC1_HUMAN  | Sodium/calcium exchanger 1 OS=Homo sapiens GN=SLC8A1 PE=1 SV=3                                          |
| NAV3_HUMAN  | Neuron navigator 3 OS=Homo sapiens GN=NAV3 PE=1 SV=2                                                    |
| NEBU_HUMAN  | Nebulin OS=Homo sapiens GN=NEB PE=1 SV=3                                                                |
| NEST_HUMAN  | Nestin OS=Homo sapiens GN=NES PE=1 SV=2                                                                 |
| NF2L1_HUMAN | Nuclear factor erythroid 2-related factor 1 OS=Homo sapiens GN=NFE2L1 PE=1 SV=1                         |
| NID1_HUMAN  | Nidogen-1 OS=Homo sapiens GN=NID1 PE=1 SV=3                                                             |
| NID2_HUMAN  | Nidogen-2 OS=Homo sapiens GN=NID2 PE=1 SV=2                                                             |
| NOTC3_HUMAN | Neurogenic locus notch homolog protein 3 OS=Homo sapiens GN=NOTCH3 PE=1 SV=1                            |
| NPC2_HUMAN  | Epididymal secretory protein E1 OS=Homo sapiens GN=NPC2 PE=1 SV=1                                       |
| NUCB1_HUMAN | Nucleobindin-1 OS=Homo sapiens GN=NUCB1 PE=1 SV=4                                                       |
| NUCL_HUMAN  | Nucleolin OS=Homo sapiens GN=NCL PE=1 SV=3                                                              |
| OAF_HUMAN   | Out at first protein homolog OS=Homo sapiens GN=OAF PE=2 SV=1                                           |
| OLA1_HUMAN  | Obg-like ATPase 1 OS=Homo sapiens GN=OLA1 PE=1 SV=2                                                     |
| OLFL1_HUMAN | Olfactomedin-like protein 1 OS=Homo sapiens GN=OLFML1 PE=1 SV=1                                         |
| OLFL3_HUMAN | Olfactomedin-like protein 3 OS=Homo sapiens GN=OLFML3 PE=2 SV=1                                         |
| OR5H2_HUMAN | Olfactory receptor 5H2 OS=Homo sapiens GN=OR5H2 PE=2 SV=3                                               |
| OS9_HUMAN   | Protein OS-9 OS=Homo sapiens GN=OS9 PE=1 SV=1                                                           |
| OTU7A_HUMAN | OTU domain-containing protein 7A OS=Homo sapiens GN=OTUD7A PE=2 SV=1                                    |
| PAI1_HUMAN  | Plasminogen activator inhibitor 1 OS=Homo sapiens GN=SERPINE1 PE=1 SV=1                                 |
| PAMR1_HUMAN | Inactive serine protease PAMR1 OS=Homo sapiens GN=PAMR1 PE=1 SV=1                                       |
| PAPP1_HUMAN | Pappalysin-1 OS=Homo sapiens GN=PAPPA PE=1 SV=3                                                         |
| PCOC1_HUMAN | Procollagen C-endopeptidase enhancer 1 OS=Homo sapiens GN=PCOLCE PE=1 SV=2                              |
| PCSK7_HUMAN | Proprotein convertase subtilisin/kexin type 7 OS=Homo sapiens GN=PCSK7 PE=1 SV=2                        |
| PDE6B_HUMAN | Rod cGMP-specific 3~,5~-cyclic phosphodiesterase subunit beta OS=Homo sapiens GN=PDE6B PE=1 SV=2        |
| PDGFC_HUMAN | Platelet-derived growth factor C OS=Homo sapiens GN=PDGFC PE=1 SV=2                                     |
| PDIA1_HUMAN | Protein disulfide-isomerase OS=Homo sapiens GN=P4HB PE=1 SV=3                                           |
| PDIA3_HUMAN | Protein disulfide-isomerase A3 OS=Homo sapiens GN=PDIA3 PE=1 SV=4                                       |
| PEBP1_HUMAN | Phosphatidylethanolamine-binding protein 1 OS=Homo sapiens GN=PEBP1 PE=1 SV=3                           |
| PEDF_HUMAN  | Pigment epithelium-derived factor OS=Homo sapiens GN=SERPINF1 PE=1 SV=3                                 |
| PGAM1_HUMAN | Phosphoglycerate mutase 1 OS=Homo sapiens GN=PGAM1 PE=1 SV=2                                            |
| PGBM_HUMAN  | Basement membrane-specific heparan sulfate proteoglycan core protein OS=Homo sapiens GN=HSPG2 PE=1 SV=3 |
| PGK1_HUMAN  | Phosphoglycerate kinase 1 OS=Homo sapiens GN=PGK1 PE=1 SV=3                                             |
| PGS1_HUMAN  | Biglycan OS=Homo sapiens GN=BGN PE=1 SV=2                                                               |
| PGS2_HUMAN  | Decorin OS=Homo sapiens GN=DCN PE=1 SV=1                                                                |
| PIMT_HUMAN  | Protein-L-isoaspartate(D-aspartate) O-methyltransferase OS=Homo sapiens GN=PCMT1 PE=1 SV=3              |
| PLEC1_HUMAN | Plectin-1 OS=Homo sapiens GN=PLEC1 PE=1 SV=3                                                            |
| PLOD1_HUMAN | Procollagen-lysine,2-oxoglutarate 5-dioxygenase 1 OS=Homo sapiens GN=PLOD1 PE=1 SV=2                    |
| PLOD3_HUMAN | Procollagen-lysine,2-oxoglutarate 5-dioxygenase 3 OS=Homo sapiens GN=PLOD3 PE=1 SV=1                    |
| PLTP_HUMAN  | Phospholipid transfer protein OS=Homo sapiens GN=PLTP PE=1 SV=1                                         |
| POSTN_HUMAN | Periostin OS=Homo sapiens GN=POSTN PE=1 SV=2                                                            |
| PPIA_HUMAN  | Peptidyl-prolyl cis-trans isomerase A OS=Homo sapiens GN=PPIA PE=1 SV=2                                 |
| PPIB_HUMAN  | Peptidyl-prolyl cis-trans isomerase B OS=Homo sapiens GN=PPIB PE=1 SV=2                                 |
| PRDX1_HUMAN | Peroxisredoxin-1 OS=Homo sapiens GN=PRDX1 PE=1 SV=1                                                     |
| PRDX2_HUMAN | Peroxisredoxin-2 OS=Homo sapiens GN=PRDX2 PE=1 SV=5                                                     |
| PRDX3_HUMAN | Thioredoxin-dependent peroxide reductase, mitochondrial OS=Homo sapiens GN=PRDX3 PE=1 SV=3              |
| PRDX6_HUMAN | Peroxisredoxin-6 OS=Homo sapiens GN=PRDX6 PE=1 SV=3                                                     |
| PRIO_HUMAN  | Major prion protein OS=Homo sapiens GN=PRNP PE=1 SV=1                                                   |
| PROF1_HUMAN | Profilin-1 OS=Homo sapiens GN=PFN1 PE=1 SV=2                                                            |

|             |                                                                                                                                          |
|-------------|------------------------------------------------------------------------------------------------------------------------------------------|
| PRS23_HUMAN | Serine protease 23 OS=Homo sapiens GN=PRSS23 PE=1 SV=1                                                                                   |
| PSA2_HUMAN  | Proteasome subunit alpha type-2 OS=Homo sapiens GN=PSMA2 PE=1 SV=2                                                                       |
| PSG4_HUMAN  | Pregnancy-specific beta-1-glycoprotein 4 OS=Homo sapiens GN=PSG4 PE=2 SV=2                                                               |
| PTGDS_HUMAN | Prostaglandin-H2 D-isomerase OS=Homo sapiens GN=PTGDS PE=1 SV=1                                                                          |
| PTK7_HUMAN  | Tyrosine-protein kinase-like 7 OS=Homo sapiens GN=PTK7 PE=1 SV=2                                                                         |
| PTN_HUMAN   | Pleiotrophin OS=Homo sapiens GN=PTN PE=1 SV=1                                                                                            |
| PTPRG_HUMAN | Receptor-type tyrosine-protein phosphatase gamma OS=Homo sapiens GN=PTPRG PE=1 SV=4                                                      |
| PTX3_HUMAN  | Pentraxin-related protein PTX3 OS=Homo sapiens GN=PTX3 PE=1 SV=2                                                                         |
| PXDN_HUMAN  | Peroxidasin homolog OS=Homo sapiens GN=PXDN PE=1 SV=2                                                                                    |
| QSOX1_HUMAN | Sulfhydryl oxidase 1 OS=Homo sapiens GN=QSOX1 PE=1 SV=3                                                                                  |
| RA1L2_HUMAN | Heterogeneous nuclear ribonucleoprotein A1-like protein 2 OS=Homo sapiens GN=HNRNPA1L2 PE=2 SV=2                                         |
| RAN_HUMAN   | GTP-binding nuclear protein Ran OS=Homo sapiens GN=RAN PE=1 SV=3                                                                         |
| RARR2_HUMAN | Retinoic acid receptor responder protein 2 OS=Homo sapiens GN=RARRS2 PE=1 SV=1                                                           |
| RBM42_HUMAN | RNA-binding protein 42 OS=Homo sapiens GN=RBM42 PE=2 SV=1                                                                                |
| RCN1_HUMAN  | Reticulocalbin-1 OS=Homo sapiens GN=RCN1 PE=1 SV=1                                                                                       |
| RCN3_HUMAN  | Reticulocalbin-3 OS=Homo sapiens GN=RCN3 PE=1 SV=1                                                                                       |
| RD23B_HUMAN | UV excision repair protein RAD23 homolog B OS=Homo sapiens GN=RD23B PE=1 SV=1                                                            |
| RECK_HUMAN  | Reversion-inducing cysteine-rich protein with Kazal motifs OS=Homo sapiens GN=RECK PE=1 SV=1                                             |
| RENH_HUMAN  | Renin receptor OS=Homo sapiens GN=ATP6AP2 PE=1 SV=2                                                                                      |
| RL4_HUMAN   | 60S ribosomal protein L4 OS=Homo sapiens GN=RPL4 PE=1 SV=5                                                                               |
| RNAS4_HUMAN | Ribonuclease 4 OS=Homo sapiens GN=RNASE4 PE=1 SV=3                                                                                       |
| ROA2_HUMAN  | Heterogeneous nuclear ribonucleoproteins A2/B1 OS=Homo sapiens GN=HNRNPA2B1 PE=1 SV=2                                                    |
| S10AB_HUMAN | Protein S100-A11 OS=Homo sapiens GN=S100A11 PE=1 SV=2                                                                                    |
| S10AG_HUMAN | Protein S100-A16 OS=Homo sapiens GN=S100A16 PE=1 SV=1                                                                                    |
| SAP_HUMAN   | Proactivator polypeptide OS=Homo sapiens GN=PSAP PE=1 SV=2                                                                               |
| SCF_HUMAN   | Kit ligand OS=Homo sapiens GN=KITLG PE=1 SV=1                                                                                            |
| SDF1_HUMAN  | Stromal cell-derived factor 1 OS=Homo sapiens GN=CXCL12 PE=1 SV=1                                                                        |
| SEM7A_HUMAN | Semaphorin-7A OS=Homo sapiens GN=SEMA7A PE=1 SV=1                                                                                        |
| SIA4A_HUMAN | CMP-N-acetylneuraminase-beta-galactosamide-alpha-2,3-sialyltransferase OS=Homo sapiens GN=ST3GAL1 PE=2 SV=1                              |
| SIA4C_HUMAN | CMP-N-acetylneuraminase-beta-galactosamide-alpha-2,3-sialyltransferase OS=Homo sapiens GN=ST3GAL4 PE=2 SV=1                              |
| SIAE_HUMAN  | Sialate O-acetyltransferase OS=Homo sapiens GN=SIAE PE=1 SV=1                                                                            |
| SIL1_HUMAN  | Nucleotide exchange factor SIL1 OS=Homo sapiens GN=SIL1 PE=1 SV=1                                                                        |
| SLIT3_HUMAN | Slit homolog 3 protein OS=Homo sapiens GN=SLIT3 PE=2 SV=2                                                                                |
| SMAL1_HUMAN | SWI/SNF-related matrix-associated actin-dependent regulator of chromatin subfamily A-like protein 1 OS=Homo sapiens GN=SMARCA1 PE=1 SV=1 |
| SNED1_HUMAN | Sushi, nidogen and EGF-like domain-containing protein 1 OS=Homo sapiens GN=SNED1 PE=1 SV=2                                               |
| SODC_HUMAN  | Superoxide dismutase [Cu-Zn] OS=Homo sapiens GN=SOD1 PE=1 SV=2                                                                           |
| SODE_HUMAN  | Extracellular superoxide dismutase [Cu-Zn] OS=Homo sapiens GN=SOD3 PE=1 SV=2                                                             |
| SPON2_HUMAN | Spondin-2 OS=Homo sapiens GN=SPON2 PE=1 SV=2                                                                                             |
| SPRC_HUMAN  | SPARC OS=Homo sapiens GN=SPARC PE=1 SV=1                                                                                                 |
| SRCLR_HUMAN | Scavenger receptor cysteine-rich domain-containing protein LOC284297 OS=Homo sapiens PE=2 SV=2                                           |
| SRP14_HUMAN | Signal recognition particle 14 kDa protein OS=Homo sapiens GN=SRP14 PE=1 SV=2                                                            |
| SRPX_HUMAN  | Sushi repeat-containing protein SRPX OS=Homo sapiens GN=SRPX PE=2 SV=1                                                                   |
| SRPX2_HUMAN | Sushi repeat-containing protein SRPX2 OS=Homo sapiens GN=SRPX2 PE=1 SV=1                                                                 |
| STC2_HUMAN  | Stanniocalcin-2 OS=Homo sapiens GN=STC2 PE=1 SV=1                                                                                        |
| STMN1_HUMAN | Stathmin OS=Homo sapiens GN=STMN1 PE=1 SV=3                                                                                              |
| SVEP1_HUMAN | Sushi, von Willebrand factor type A, EGF and pentraxin domain-containing protein 1 OS=Homo sapiens GN=SVEP1 PE=1 SV=2                    |
| SYCP1_HUMAN | Synaptonemal complex protein 1 OS=Homo sapiens GN=SYCP1 PE=1 SV=2                                                                        |
| TAD2B_HUMAN | Transcriptional adapter 2-beta OS=Homo sapiens GN=TADA2B PE=1 SV=2                                                                       |
| TAGL_HUMAN  | Transgelin OS=Homo sapiens GN=TAGLN PE=1 SV=4                                                                                            |
| TAGL2_HUMAN | Transgelin-2 OS=Homo sapiens GN=TAGLN2 PE=1 SV=3                                                                                         |

|             |                                                                                                  |
|-------------|--------------------------------------------------------------------------------------------------|
| TARSH_HUMAN | Target of Nesh-SH3 OS=Homo sapiens GN=ABI3BP PE=1 SV=1                                           |
| TBA1B_HUMAN | Tubulin alpha-1B chain OS=Homo sapiens GN=TUBA1B PE=1 SV=1                                       |
| TBB2A_HUMAN | Tubulin beta-2A chain OS=Homo sapiens GN=TUBB2A PE=1 SV=1                                        |
| TCOF_HUMAN  | Treacle protein OS=Homo sapiens GN=TCOF1 PE=1 SV=2                                               |
| TERA_HUMAN  | Transitional endoplasmic reticulum ATPase OS=Homo sapiens GN=VCP PE=1 SV=4                       |
| TETN_HUMAN  | Tetranectin OS=Homo sapiens GN=CLEC3B PE=1 SV=2                                                  |
| TFPI1_HUMAN | Tissue factor pathway inhibitor OS=Homo sapiens GN=TFPI PE=1 SV=1                                |
| TGFR3_HUMAN | TGF-beta receptor type III OS=Homo sapiens GN=TGFBR3 PE=1 SV=2                                   |
| THBG_HUMAN  | Thyroxine-binding globulin OS=Homo sapiens GN=SERPINA7 PE=1 SV=2                                 |
| THIO_HUMAN  | Thioredoxin OS=Homo sapiens GN=TXN PE=1 SV=3                                                     |
| THRB_HUMAN  | Prothrombin OS=Homo sapiens GN=F2 PE=1 SV=2                                                      |
| THY1_HUMAN  | Thy-1 membrane glycoprotein OS=Homo sapiens GN=THY1 PE=1 SV=2                                    |
| THYG_HUMAN  | Thyroglobulin OS=Homo sapiens GN=TG PE=1 SV=5                                                    |
| TIMP1_HUMAN | Metalloproteinase inhibitor 1 OS=Homo sapiens GN=TIMP1 PE=1 SV=1                                 |
| TIMP2_HUMAN | Metalloproteinase inhibitor 2 OS=Homo sapiens GN=TIMP2 PE=1 SV=2                                 |
| TKT_HUMAN   | Transketolase OS=Homo sapiens GN=TKT PE=1 SV=3                                                   |
| TLN1_HUMAN  | Talin-1 OS=Homo sapiens GN=TLN1 PE=1 SV=3                                                        |
| TPIS_HUMAN  | Triosephosphate isomerase OS=Homo sapiens GN=TP11 PE=1 SV=2                                      |
| TPM2_HUMAN  | Tropomyosin beta chain OS=Homo sapiens GN=TPM2 PE=1 SV=1                                         |
| TPM3_HUMAN  | Tropomyosin alpha-3 chain OS=Homo sapiens GN=TPM3 PE=1 SV=1                                      |
| TPM4_HUMAN  | Tropomyosin alpha-4 chain OS=Homo sapiens GN=TPM4 PE=1 SV=3                                      |
| TPST1_HUMAN | Protein-tyrosine sulfotransferase 1 OS=Homo sapiens GN=TPST1 PE=2 SV=1                           |
| TR11B_HUMAN | Tumor necrosis factor receptor superfamily member 11B OS=Homo sapiens GN=TNFRSF11B PE=1 SV=2     |
| TRAP1_HUMAN | Heat shock protein 75 kDa, mitochondrial OS=Homo sapiens GN=TRAP1 PE=1 SV=3                      |
| TRFE_HUMAN  | Serotransferrin OS=Homo sapiens GN=TF PE=1 SV=2                                                  |
| TRFL_HUMAN  | Lactotransferrin OS=Homo sapiens GN=LTF PE=1 SV=6                                                |
| TSP1_HUMAN  | Thrombospondin-1 OS=Homo sapiens GN=THBS1 PE=1 SV=2                                              |
| TSP2_HUMAN  | Thrombospondin-2 OS=Homo sapiens GN=THBS2 PE=1 SV=2                                              |
| TWSG1_HUMAN | Twisted gastrulation protein homolog 1 OS=Homo sapiens GN=TWSG1 PE=2 SV=1                        |
| UACA_HUMAN  | Uveal autoantigen with coiled-coil domains and ankyrin repeats OS=Homo sapiens GN=UACA PE=1 SV=2 |
| UBE2O_HUMAN | Ubiquitin-conjugating enzyme E2 O OS=Homo sapiens GN=UBE2O PE=1 SV=3                             |
| UBE4B_HUMAN | Ubiquitin conjugation factor E4 B OS=Homo sapiens GN=UBE4B PE=1 SV=1                             |
| UFO_HUMAN   | Tyrosine-protein kinase receptor UFO OS=Homo sapiens GN=AXL PE=1 SV=3                            |
| VAS1_HUMAN  | V-type proton ATPase subunit S1 OS=Homo sapiens GN=ATP6AP1 PE=1 SV=2                             |
| VASN_HUMAN  | Vasorin OS=Homo sapiens GN=VASN PE=1 SV=1                                                        |
| VAV2_HUMAN  | Guanine nucleotide exchange factor VAV2 OS=Homo sapiens GN=VAV2 PE=1 SV=2                        |
| VIME_HUMAN  | Vimentin OS=Homo sapiens GN=VIM PE=1 SV=4                                                        |
| VTDB_HUMAN  | Vitamin D-binding protein OS=Homo sapiens GN=GC PE=1 SV=1                                        |
| VTNC_HUMAN  | Vitronectin OS=Homo sapiens GN=VTN PE=1 SV=1                                                     |
| VWA1_HUMAN  | von Willebrand factor A domain-containing protein 1 OS=Homo sapiens GN=VWA1 PE=2 SV=1            |
| WBP4_HUMAN  | WW domain-binding protein 4 OS=Homo sapiens GN=WBP4 PE=1 SV=1                                    |
| WIPF2_HUMAN | WAS/WASL-interacting protein family member 2 OS=Homo sapiens GN=WIPF2 PE=1 SV=1                  |
| WNT2B_HUMAN | Protein Wnt-2b OS=Homo sapiens GN=WNT2B PE=1 SV=2                                                |
| WNT5A_HUMAN | Protein Wnt-5a OS=Homo sapiens GN=WNT5A PE=1 SV=2                                                |
| XKRY_HUMAN  | Testis-specific XK-related protein, Y-linked OS=Homo sapiens GN=XKRY PE=2 SV=1                   |
| XPP1_HUMAN  | Xaa-Pro aminopeptidase 1 OS=Homo sapiens GN=XPNPEP1 PE=1 SV=3                                    |
| ZDBF2_HUMAN | DBF4-type zinc finger-containing protein 2 OS=Homo sapiens GN=ZDBF2 PE=1 SV=3                    |
| ZN197_HUMAN | Zinc finger protein 197 OS=Homo sapiens GN=ZNF197 PE=2 SV=1                                      |

Supplemental Table II

## LA Fibroblasts:HA Fibroblasts

| Accession   | Description                                                                                                            | Sequence                                                                                                                                                                                                                                          | # Indiv depts                                                      | Pep SM ratio                                                                                                                           | Pep GM ratio                                                                                                                           | Pep ratio                                                                                                                              | # pep    | Prot SM of pep SMs | Prot GM of pep SMs | Prot ratio       | Prot weighted GM of pep SMs | Prot weighted GM of pep SMs | Prot ratio       | Prot weighted GM of pep SMs | Prot weighted GM of pep SMs | Prot weighted GM of pep SMs |                  |                  |
|-------------|------------------------------------------------------------------------------------------------------------------------|---------------------------------------------------------------------------------------------------------------------------------------------------------------------------------------------------------------------------------------------------|--------------------------------------------------------------------|----------------------------------------------------------------------------------------------------------------------------------------|----------------------------------------------------------------------------------------------------------------------------------------|----------------------------------------------------------------------------------------------------------------------------------------|----------|--------------------|--------------------|------------------|-----------------------------|-----------------------------|------------------|-----------------------------|-----------------------------|-----------------------------|------------------|------------------|
| 14338_HUMAN | 14-3-3 protein beta/alpha OS=Homo sapiens GN=YWHAB PE=1 SV=3                                                           | DSTLMQLR<br>IEAELODCNDVLELLK<br>NLLSVAYK<br>QTVTNSQDAYQEAFEISK<br>TAFDEAIELDTLNEESYK<br>YDMMAAAIK<br>YLSEVSSGNK<br>29.9051 29.9051                                                                                                                | 0<br>1<br>1<br>1<br>1<br>1<br>1                                    | 0<br>2.5993<br>0.9804<br>0.3619<br>7.8607<br>29.9051                                                                                   | 0<br>2.5993<br>0.9899<br>0.3619<br>7.8064<br>29.9051                                                                                   | 0<br>2.5993<br>0.9899<br>0.3619<br>7.8064<br>29.9051                                                                                   | 7<br>7   | 8.4536<br>7.6196   | 3.4802<br>3.6401   | 3.4802<br>3.6401 | 3.4802<br>3.6401            | 3.4802<br>3.6401            | 3.4802<br>3.6401 | 3.4802<br>3.6401            | 3.4802<br>3.6401            | 3.4802<br>3.6401            |                  |                  |
| 1433E_HUMAN | 14-3-3 protein epsilon OS=Homo sapiens GN=YWHAE PE=1 SV=1                                                              | DSTLMQLR<br>FAFDIAEMLDTLSEESYK<br>EAENSLWAYK<br>HLFAPATGESK<br>LICCDDLDVLDK<br>NLLSVAYK<br>QIMVTELEK                                                                                                                                              | 3<br>3<br>2<br>2<br>1<br>1                                         | 1.6744<br>6.1122<br>2.5072<br>0.9005<br>2.5993<br>0.7877<br>0.5298                                                                     | 1.4007<br>6.1122<br>2.5072<br>0.8962<br>2.5993<br>0.7574<br>0.5298                                                                     | 2.0248<br>6.1122<br>2.5072<br>0.8962<br>2.5993<br>0.7574<br>0.5298                                                                     | 7<br>7   | 2.319<br>2.2334    | 1.6519<br>1.5465   | 1.6519<br>1.5465 | 1.6519<br>1.5465            | 1.6519<br>1.5465            | 1.6519<br>1.5465 | 1.6519<br>1.5465            | 1.6519<br>1.5465            |                             |                  |                  |
| 1433F_HUMAN | 14-3-3 protein delta OS=Homo sapiens GN=YWHAF PE=1 SV=4                                                                | DSTLMQLR<br>ELETVCNDVLSLLDK<br>NLLSVAYK<br>NSVVEASEAYK<br>QAFDDAIEMLDTLNEESYK<br>YLAEVASGEK<br>11.3728 11.3728                                                                                                                                    | 2<br>2<br>1<br>1<br>1<br>1                                         | 7.1122<br>0.7763<br>2.5993<br>0.7774<br>0.7674<br>11.3728                                                                              | 4.925<br>0.7662<br>2.5993<br>0.7574<br>0.7674<br>11.3728                                                                               | 4.913<br>0.7662<br>2.5993<br>0.7574<br>0.7674<br>11.3728                                                                               | 6<br>6   | 3.9037<br>3.5072   | 2.1527<br>1.9648   | 1.9648<br>1.7486 | 1.9648<br>1.7486            | 1.9648<br>1.7486            | 1.9648<br>1.7486 | 1.9648<br>1.7486            | 1.9648<br>1.7486            | 1.9648<br>1.7486            |                  |                  |
| 1433G_HUMAN | 14-3-3 protein gamma OS=Homo sapiens GN=YWHAG PE=1 SV=2                                                                | DSTLMQLR<br>TAFDDAIEMLDTLNEESYK<br>YDMMAAAIK<br>YLAEVASGEK<br>1.5188 1.5188                                                                                                                                                                       | 1<br>2<br>2<br>1                                                   | 1.5188<br>8.8137<br>7.8064<br>7.8064                                                                                                   | 1.5188<br>8.8137<br>7.8064<br>7.8064                                                                                                   | 1.5188<br>8.8137<br>7.8064<br>7.8064                                                                                                   | 4<br>4   | 5.8193<br>6.3961   | 4.7963<br>5.7149   | 4.7963<br>5.7149 | 4.7963<br>5.7149            | 4.7963<br>5.7149            | 4.7963<br>5.7149 | 4.7963<br>5.7149            | 4.7963<br>5.7149            | 4.7963<br>5.7149            |                  |                  |
| 1433S_HUMAN | 14-3-3 protein sigma OS=Homo sapiens GN=SFN PE=1 SV=1                                                                  | DSTLMQLR<br>NLLSVAYK<br>1.7122 1.7122                                                                                                                                                                                                             | 2<br>2                                                             | 1.7122<br>2.5993                                                                                                                       | 1.7122<br>2.5993                                                                                                                       | 1.7122<br>2.5993                                                                                                                       | 2<br>2   | 4.8657<br>5.6079   | 4.2996<br>5.0849   | 4.2996<br>5.0849 | 4.2996<br>5.0849            | 4.2996<br>5.0849            | 4.2996<br>5.0849 | 4.2996<br>5.0849            | 4.2996<br>5.0849            | 4.2996<br>5.0849            |                  |                  |
| 1433T_HUMAN | 14-3-3 protein theta OS=Homo sapiens GN=YWHAG PE=1 SV=1                                                                | DSTLMQLR<br>NLLSVAYK<br>QTVNDSGDAYQEAFEISK<br>SICITLLELLK<br>TAFDEAIELDTLNEESYK<br>YDMATCDAIK<br>YLMANATPESK<br>2.7122 2.7122                                                                                                                     | 2<br>1<br>1<br>1<br>1<br>1                                         | 2.7122<br>2.5993<br>1.0642<br>1.024<br>2.8393<br>0.9115<br>1.0888                                                                      | 2.7122<br>2.5993<br>1.024<br>1.024<br>2.8393<br>0.9115<br>1.0888                                                                       | 2.7122<br>2.5993<br>1.024<br>1.024<br>2.8393<br>0.9115<br>1.0888                                                                       | 7<br>7   | 2.7121<br>3.2333   | 1.9444<br>2.2949   | 1.9444<br>2.2949 | 1.9444<br>2.2949            | 1.9444<br>2.2949            | 1.9444<br>2.2949 | 1.9444<br>2.2949            | 1.9444<br>2.2949            | 1.9444<br>2.2949            | 1.9444<br>2.2949 |                  |
| 1433Z_HUMAN | 14-3-3 protein zeta/delta OS=Homo sapiens GN=YWHAZ PE=1 SV=1                                                           | DINDVLSLEK<br>DITLMLR<br>EKTELK<br>FLPHAGASGK<br>GVDQSQAYQEAFEISK<br>NLLSVAYK<br>TAFDEAIEMLDTLSEESYK<br>YVSSIEQK<br>YDMMAAAIK<br>YLAEVASGEK<br>1.3659 1.3659                                                                                      | 5<br>2<br>1<br>1<br>2<br>1<br>6<br>1<br>1<br>1                     | 1.3659<br>7.1122<br>0.083<br>1.3228<br>1.1199<br>2.5993<br>1.1229<br>0.872<br>1.875<br>0.882                                           | 1.3083<br>7.1122<br>0.083<br>1.3228<br>1.1199<br>2.5993<br>1.2099<br>0.872<br>1.875<br>0.882                                           | 1.3301<br>7.1122<br>0.083<br>1.3228<br>1.1199<br>2.5993<br>1.2099<br>0.872<br>1.875<br>0.882                                           | 10<br>10 | 1.8604<br>1.6409   | 0.8639<br>1.101    | 0.8639<br>1.101  | 0.8639<br>1.101             | 0.8639<br>1.101             | 0.8639<br>1.101  | 0.8639<br>1.101             | 0.8639<br>1.101             | 0.8639<br>1.101             |                  |                  |
| ZAAA_HUMAN  | Serine/threonine protein phosphatase 2A B5 kDa regulatory subunit A alpha isoform OS=Homo sapiens GN=PPP2R1A PE=1 SV=4 | QLSQSLPILVEAEDAK<br>1.8857 1.8857                                                                                                                                                                                                                 | 2                                                                  | 1.8857                                                                                                                                 | 1.8857                                                                                                                                 | 1.8857                                                                                                                                 | 1        | 0.8657             | 0.8657             | 0.8657           | 0.8657                      | 0.8657                      | 0.8657           | 0.8657                      | 0.8657                      | 0.8657                      |                  |                  |
| ZAB8_HUMAN  | Serine/threonine protein phosphatase 2A B5 kDa regulatory subunit A beta isoform OS=Homo sapiens GN=PPP2R1B PE=1 SV=3  | AGAGVDFEIK<br>NFKLNLLDFFK<br>VDGTEPCQVWQDQAEVSK<br>1.22 1.22                                                                                                                                                                                      | 2                                                                  | 1.22                                                                                                                                   | 1.22                                                                                                                                   | 1.22                                                                                                                                   | 3        | 0.8184             | 0.8712             | 0.6421           | 0.72                        | 0.72                        | 0.72             | 0.72                        | 0.72                        | 0.72                        |                  |                  |
| BPGD_HUMAN  | B-phosphogluconate dehydrogenase, decarboxylating OS=Homo sapiens GN=PGD PE=1 SV=3                                     | ASAEALGENSEVAK<br>EFSFVMYK<br>NLNDYPLPGGLAEFK<br>TCGFDFGAEVSK<br>0.5882 0.5882                                                                                                                                                                    | 1<br>1<br>2<br>1                                                   | 0.5882<br>0.2098<br>4.3771<br>1.0325                                                                                                   | 0.5882<br>0.2098<br>4.3771<br>1.0325                                                                                                   | 0.5882<br>0.2098<br>4.3771<br>1.0325                                                                                                   | 4<br>4   | 1.5523<br>1.9367   | 0.8645<br>1.1671   | 0.8645<br>1.1671 | 0.8645<br>1.1671            | 0.8645<br>1.1671            | 0.8645<br>1.1671 | 0.8645<br>1.1671            | 0.8645<br>1.1671            | 0.8645<br>1.1671            |                  |                  |
| AATM_HUMAN  | Aspartate aminotransferase, mitochondrial OS=Homo sapiens GN=GF2 PE=1 SV=2                                             | ASAEALGENSEVAK<br>EFSFVMYK<br>NLNDYPLPGGLAEFK<br>TCGFDFGAEVSK<br>0.5882 0.5882                                                                                                                                                                    | 1<br>1<br>2<br>1                                                   | 0.5882<br>0.2098<br>4.3771<br>1.0325                                                                                                   | 0.5882<br>0.2098<br>4.3771<br>1.0325                                                                                                   | 0.5882<br>0.2098<br>4.3771<br>1.0325                                                                                                   | 4<br>4   | 1.5523<br>1.9367   | 0.8645<br>1.1671   | 0.8645<br>1.1671 | 0.8645<br>1.1671            | 0.8645<br>1.1671            | 0.8645<br>1.1671 | 0.8645<br>1.1671            | 0.8645<br>1.1671            | 0.8645<br>1.1671            |                  |                  |
| ACBP_HUMAN  | Acyl-CoA binding protein OS=Homo sapiens GN=CBP PE=1 SV=2                                                              | QVQAGPLVLAQK<br>1.0911 1.0911                                                                                                                                                                                                                     | 1                                                                  | 1.0911                                                                                                                                 | 1.0911                                                                                                                                 | 1.0911                                                                                                                                 | 1        | 0.8098             | 0.8098             | 0.8098           | 0.8098                      | 0.8098                      | 0.8098           | 0.8098                      | 0.8098                      | 0.8098                      |                  |                  |
| ACOC_HUMAN  | Cytosolic acornite hydratase OS=Homo sapiens GN=ACO1 PE=1 SV=3                                                         | AGFAGDDAPR<br>BLETVLMK<br>DSYVGDEAGSK<br>ETALAPSTMK<br>GILTK<br>LCYVALDFENMATASSSSLEK<br>2.1895 2.1895                                                                                                                                            | 2<br>4<br>2<br>4<br>1<br>2                                         | 1.8195<br>1.8195<br>2.1895<br>1.8195<br>1.8195<br>1.8195                                                                               | 1.8195<br>1.8195<br>2.1895<br>1.8195<br>1.8195<br>1.8195                                                                               | 1.8195<br>1.8195<br>2.1895<br>1.8195<br>1.8195<br>1.8195                                                                               | 6<br>6   | 1.8353<br>1.8952   | 1.8196<br>1.8782   | 1.8196<br>1.8782 | 1.8196<br>1.8782            | 1.8196<br>1.8782            | 1.8196<br>1.8782 | 1.8196<br>1.8782            | 1.8196<br>1.8782            | 1.8196<br>1.8782            |                  |                  |
| ACTA_HUMAN  | Actin, arctic smooth muscle OS=Homo sapiens GN=ACTA2 PE=1 SV=1                                                         | AGFAGDDAPR<br>BLETVLMK<br>DSYVGDEAGSK<br>ETALAPSTMK<br>GILTK<br>LCYVALDFENMATASSSSLEK<br>1.9911 1.9911                                                                                                                                            | 2<br>4<br>2<br>4<br>1<br>2                                         | 1.8195<br>1.8195<br>2.1895<br>1.8195<br>1.8195<br>1.8195                                                                               | 1.8195<br>1.8195<br>2.1895<br>1.8195<br>1.8195<br>1.8195                                                                               | 1.8195<br>1.8195<br>2.1895<br>1.8195<br>1.8195<br>1.8195                                                                               | 6<br>6   | 1.8353<br>1.8952   | 1.8196<br>1.8782   | 1.8196<br>1.8782 | 1.8196<br>1.8782            | 1.8196<br>1.8782            | 1.8196<br>1.8782 | 1.8196<br>1.8782            | 1.8196<br>1.8782            | 1.8196<br>1.8782            | 1.8196<br>1.8782 |                  |
| ACTB_HUMAN  | Actin, cytoplasmic 1 OS=Homo sapiens GN=ACTB PE=1 SV=1                                                                 | AGFAGDDAPR<br>BLETVLMK<br>DSYVGDEAGSK<br>ETALAPSTMK<br>GILTK<br>LCYVALDFENMATASSSSLEK<br>1.7325 1.7325                                                                                                                                            | 2<br>5<br>5<br>2<br>4<br>2                                         | 1.3725<br>1.8245<br>1.8195<br>2.6436<br>2.1925<br>1.6561                                                                               | 1.362<br>1.7783<br>1.8196<br>2.2699<br>2.1372<br>1.6347                                                                                | 1.362<br>1.7783<br>1.8196<br>2.2699<br>2.1372<br>1.6347                                                                                | 12<br>12 | 1.7099<br>1.9012   | 1.3268<br>1.7266   | 1.3268<br>1.7266 | 1.3268<br>1.7266            | 1.3268<br>1.7266            | 1.3268<br>1.7266 | 1.3268<br>1.7266            | 1.3268<br>1.7266            | 1.3268<br>1.7266            | 1.3268<br>1.7266 |                  |
| ACTBL_HUMAN | Beta-actin-like protein 2 OS=Homo sapiens GN=ACTBL2 PE=1 SV=2                                                          | DITLVMK<br>HQQHVMGQSK<br>IAPPERK<br>VAPDEPLVLEAPLNK<br>1.8245 1.8245                                                                                                                                                                              | 5<br>1<br>1<br>1                                                   | 1.8245<br>0.0391<br>2.0606<br>1.5686                                                                                                   | 1.7783<br>0.0391<br>2.0606<br>1.5686                                                                                                   | 1.7783<br>0.0391<br>2.0606<br>1.5686                                                                                                   | 4<br>4   | 1.381<br>1.6024    | 0.6964<br>1.1719   | 0.6964<br>1.1719 | 0.6964<br>1.1719            | 0.6964<br>1.1719            | 0.6964<br>1.1719 | 0.6964<br>1.1719            | 0.6964<br>1.1719            | 0.6964<br>1.1719            |                  |                  |
| ACTBM_HUMAN | Beta-actin-like protein 3 OS=Homo sapiens GN=ACTBL3 PE=1 SV=1                                                          | AGFAGDDAPR<br>BLETVLMK<br>DSYVGDEAGSK<br>ETALAPSTMK<br>GILTK<br>LCYVALDFENMATASSSSLEK<br>1.2004 1.2004                                                                                                                                            | 1<br>1<br>2<br>3<br>1<br>2                                         | 1.2004<br>1.8245<br>1.8195<br>2.4803<br>0.0391<br>2.0606                                                                               | 1.2004<br>1.8245<br>1.8195<br>2.4803<br>0.0391<br>2.0606                                                                               | 1.2004<br>1.8245<br>1.8195<br>2.4803<br>0.0391<br>2.0606                                                                               | 8<br>8   | 1.8811<br>1.9438   | 1.2324<br>1.4133   | 1.2324<br>1.4133 | 1.2324<br>1.4133            | 1.2324<br>1.4133            | 1.2324<br>1.4133 | 1.2324<br>1.4133            | 1.2324<br>1.4133            | 1.2324<br>1.4133            | 1.2324<br>1.4133 |                  |
| ACTG_HUMAN  | Actin, cytoplasmic 2 OS=Homo sapiens GN=ACTG1 PE=1 SV=1                                                                | AGFAGDDAPR<br>BLETVLMK<br>DSYVGDEAGSK<br>ETALAPSTMK<br>GILTK<br>LCYVALDFENMATASSSSLEK<br>1.7944 1.7944                                                                                                                                            | 3<br>5<br>5<br>2<br>4<br>2                                         | 1.7944<br>1.3725<br>1.8245<br>2.6436<br>2.1925<br>1.6561                                                                               | 1.7855<br>1.362<br>1.7783<br>2.2699<br>2.1372<br>1.6347                                                                                | 1.7855<br>1.362<br>1.7783<br>2.2699<br>2.1372<br>1.6347                                                                                | 12<br>12 | 1.7099<br>1.9012   | 1.3268<br>1.7266   | 1.3268<br>1.7266 | 1.3268<br>1.7266            | 1.3268<br>1.7266            | 1.3268<br>1.7266 | 1.3268<br>1.7266            | 1.3268<br>1.7266            | 1.3268<br>1.7266            | 1.3268<br>1.7266 |                  |
| ACTH1_HUMAN | Actin, gamma-enteric smooth muscle OS=Homo sapiens GN=ACTG2 PE=1 SV=1                                                  | AGFAGDDAPR<br>BLETVLMK<br>DSYVGDEAGSK<br>ETALAPSTMK<br>GILTK<br>LCYVALDFENMATASSSSLEK<br>1.5704 1.5704                                                                                                                                            | 1<br>1<br>2<br>3<br>1<br>2                                         | 1.5704<br>1.2828<br>1.3679<br>1.8213<br>1.4696<br>1.5704                                                                               | 1.5704<br>1.2828<br>1.3679<br>1.8213<br>1.4696<br>1.5704                                                                               | 1.5704<br>1.2828<br>1.3679<br>1.8213<br>1.4696<br>1.5704                                                                               | 5<br>5   | 2.1064<br>2.0003   | 0.8815<br>1.8117   | 0.8815<br>1.8117 | 0.8815<br>1.8117            | 0.8815<br>1.8117            | 0.8815<br>1.8117 | 0.8815<br>1.8117            | 0.8815<br>1.8117            | 0.8815<br>1.8117            |                  |                  |
| ACTN1_HUMAN | Alpha-actinin-1 OS=Homo sapiens GN=ACTN1 PE=1 SV=2                                                                     | AMTYKSPYHFASGQK<br>ASHAEWTDQK<br>CKLENFNTLQK<br>DLLDPAWEK<br>FAQDISVEETSAK<br>GVEVLLNEIR<br>KCDVNDLGAALQK<br>DQLEGHQLDQALQK<br>IVTYHNMANGNYPYITIPQENGK<br>1.2427 1.2427                                                                           | 1<br>3<br>1<br>3<br>1<br>1<br>2<br>1<br>1<br>1                     | 1.2427<br>1.0175<br>1.0025<br>1.4875<br>1.2427<br>1.4877<br>0.8288<br>0.7608<br>1.0079<br>2.3307                                       | 1.2338<br>1.0175<br>1.0025<br>1.4807<br>1.2428<br>1.4877<br>0.849<br>0.7608<br>1.0079<br>2.3307                                        | 1.2338<br>1.0175<br>1.0025<br>1.4807<br>1.2428<br>1.4877<br>0.849<br>0.7608<br>1.0079<br>2.3307                                        | 15<br>15 | 1.2375<br>1.2476   | 1.1925<br>2.218    | 1.1925<br>2.218  | 1.1925<br>2.218             | 1.1925<br>2.218             | 1.1925<br>2.218  | 1.1925<br>2.218             | 1.1925<br>2.218             | 1.1925<br>2.218             | 1.1925<br>2.218  |                  |
| ACTN2_HUMAN | Alpha-actinin-2 OS=Homo sapiens GN=ACTN2 PE=1 SV=1                                                                     | COLLENFNTLQK<br>DLLDPAWEK<br>FAQDISVEETSAK<br>GVEVLLNEIR<br>LEDAQKHEVLLNEIR<br>1.0025 1.0025                                                                                                                                                      | 1<br>3<br>1<br>1<br>1                                              | 1.0025<br>1.4875<br>1.2428<br>1.4877<br>1.2259                                                                                         | 1.0025<br>1.4807<br>1.2428<br>1.4877<br>1.2259                                                                                         | 1.0025<br>1.4807<br>1.2428<br>1.4877<br>1.2259                                                                                         | 5<br>5   | 1.0867<br>1.212    | 0.9082<br>1.08     | 0.9082<br>1.08   | 0.9082<br>1.08              | 0.9082<br>1.08              | 0.9082<br>1.08   | 0.9082<br>1.08              | 0.9082<br>1.08              | 0.9082<br>1.08              | 0.9082<br>1.08   |                  |
| ACTN3_HUMAN | Alpha-actinin-3 OS=Homo sapiens GN=ACTN3 PE=1 SV=2                                                                     | COLLENFNTLQK<br>DLLDPAWEK<br>FAQDISVEETSAK<br>GVEVLLNEIR<br>LEDAQKHEVLLNEIR<br>1.0025 1.0025                                                                                                                                                      | 1<br>3<br>1<br>1<br>1                                              | 1.0025<br>1.4875<br>1.2428<br>1.4877<br>1.2259                                                                                         | 1.0025<br>1.4807<br>1.2428<br>1.4877<br>1.2259                                                                                         | 1.0025<br>1.4807<br>1.2428<br>1.4877<br>1.2259                                                                                         | 3<br>3   | 1.2468<br>1.3163   | 1.2306<br>1.3049   | 1.2306<br>1.3049 | 1.2306<br>1.3049            | 1.2306<br>1.3049            | 1.2306<br>1.3049 | 1.2306<br>1.3049            | 1.2306<br>1.3049            | 1.2306<br>1.3049            | 1.2306<br>1.3049 |                  |
| ACTN4_HUMAN | Alpha-actinin-4 OS=Homo sapiens GN=ACTN4 PE=1 SV=2                                                                     | AMTYKSPYHFASGQK<br>ASHAEWTDQK<br>CKLENFNTLQK<br>DLLDPAWEK<br>EALAAIK<br>ETDTDTDQDAVFSK<br>FAQDISVEETSAK<br>GVEVLLNEIR<br>ISEIMNLTLEDQLSK<br>KDPYVNLNANFAVEIK<br>LSSSNYPYITIPQENGK<br>QFASANNVPWFQTK<br>TNEVHDKLTK<br>VGVGQLLTIAR<br>1.2427 1.2427 | 1<br>3<br>1<br>3<br>1<br>1<br>1<br>1<br>1<br>1<br>1<br>1<br>1<br>1 | 1.2427<br>1.0175<br>1.0025<br>1.4875<br>1.9996<br>1.8248<br>1.2427<br>1.4877<br>3.7604<br>1.0013<br>0.979<br>1.0527<br>1.052<br>1.2288 | 1.2338<br>1.0175<br>1.0025<br>1.4807<br>1.9996<br>1.8248<br>1.2428<br>1.4877<br>3.7604<br>1.0013<br>0.979<br>1.0527<br>1.052<br>1.2288 | 1.2338<br>1.0175<br>1.0025<br>1.4807<br>1.9996<br>1.8248<br>1.2428<br>1.4877<br>3.7604<br>1.0013<br>0.979<br>1.0527<br>1.052<br>1.2288 | 14<br>14 | 1.4621<br>1.4548   | 1.3539<br>1.3734   | 1.3539<br>1.3734 | 1.3539<br>1.3734            | 1.3539<br>1.3734            | 1.3539<br>1.3734 | 1.3539<br>1.3734            | 1.3539<br>1.3734            | 1.3539<br>1.3734            | 1.3539<br>1.3734 | 1.3539<br>1.3734 |
| ACTS_HUMAN  | Actin, alpha skeletal muscle OS=Homo sapiens GN=ACTA1 PE=1 SV=1                                                        | AGFAGDDAPR<br>BLETVLMK<br>DSYVGDEAGSK<br>ETALAPSTMK<br>GILTK<br>LCYVALDFENMATASSSSLEK<br>1.7944 1.7944                                                                                                                                            | 3<br>5<br>5<br>2<br>4<br>2                                         | 1.7944<br>1.3725<br>1.8245<br>2.6436<br>2.1925<br>1.6561                                                                               | 1.7855<br>1.362<br>1.7783<br>2.2699<br>2.1372<br>1.6347                                                                                | 1.7855<br>1.362<br>1.7783<br>2.2699<br>2.1372<br>1.6347                                                                                | 9<br>9   | 1.6947<br>1.9143   | 1.2145<br>1.6848   | 1.2145<br>1.6848 | 1.2145<br>1.6848            | 1.2145<br>1.6848            | 1.2145<br>1.6848 | 1.2145<br>1.6848            | 1.2145<br>1.6848            | 1.2145<br>1.6848            | 1.2145<br>1.6848 |                  |
| ADAM9_HUMAN | Disintegrin and metalloprotease domain-containing protein 9 OS=Homo sapiens GN=ADAM9 PE=1 SV=1                         | LLSFAEIVVYTYK<br>QVSYVAGAK<br>1.4814 1.4814                                                                                                                                                                                                       | 1                                                                  | 1.4814                                                                                                                                 | 1.4814                                                                                                                                 | 1.4814                                                                                                                                 | 2        | 0.3813             | 0.3813             | 0.3813           | 0.3813                      | 0.3813                      | 0.3813           | 0.3813                      | 0.3813                      | 0.3813                      |                  |                  |
| ADK_HUMAN   | Adenosine kinase OS=Homo sapiens GN=ADK PE=1 SV=2                                                                      | GLNAYK<br>1.6485 1.6485                                                                                                                                                                                                                           | 1                                                                  | 1.6485                                                                                                                                 | 1.6485                                                                                                                                 | 1.6485                                                                                                                                 | 1        | 0.6485             | 0.6485             | 0.6485           | 0.6485                      | 0.6485                      | 0.6485           | 0.6485                      | 0.6485                      | 0.6485                      |                  |                  |
| AEBP1_HUMAN | Adipocyte enhancer-binding protein 1 OS=Homo sapiens GN=AEBP1 PE=1 SV=1                                                | GEDEVEVSEADVFAIR<br>VLSRDTVSTEVR<br>1.0983 1.0983                                                                                                                                                                                                 | 1                                                                  | 1.0983                                                                                                                                 | 1.0983                                                                                                                                 | 1.0983                                                                                                                                 | 2        | 0.229              | 0.229              | 0.1807           | 0.1807                      | 0.1807                      | 0.1807           | 0.1807                      | 0.1807                      | 0.1807                      |                  |                  |
| AGR1_HUMAN  | Agonin OS=Homo sapiens GN=AGR1 PE=1 SV=4                                                                               | SSVSTLDLR<br>1.3848 1.3848                                                                                                                                                                                                                        | 1                                                                  | 1.3848                                                                                                                                 | 1.3848                                                                                                                                 | 1.3848                                                                                                                                 | 1        | 0.3848             | 0.384              |                  |                             |                             |                  |                             |                             |                             |                  |                  |

|             |                                                                                                   |                                                                                                                                                                                                              |                                                                                                                                                                      |                                                                                                                                                                                                                                          |                                                     |                                                                                                                                                                   |                                                                                                                                                                   |                                                       |
|-------------|---------------------------------------------------------------------------------------------------|--------------------------------------------------------------------------------------------------------------------------------------------------------------------------------------------------------------|----------------------------------------------------------------------------------------------------------------------------------------------------------------------|------------------------------------------------------------------------------------------------------------------------------------------------------------------------------------------------------------------------------------------|-----------------------------------------------------|-------------------------------------------------------------------------------------------------------------------------------------------------------------------|-------------------------------------------------------------------------------------------------------------------------------------------------------------------|-------------------------------------------------------|
| AL1A1_HUMAN | Retinal dehydrogenase 1 OS=Homo sapiens GN=ALDH1A1 PE=1 SV=2                                      | EAGFFPGVNVVPGYGTAGAISSHMIDK<br>IFWNEHEDSRGK<br>LVSANVNDLADGK<br>SLDQVK<br>VATFDSTGVK<br>YLGPNLTPVDTGQDKEQYVK                                                                                                 | 1 5.7793<br>1 0.6848<br>2 1.4754<br>1 1.0649<br>1 0.2408<br>1 0.6027                                                                                                 | 5.7793<br>0.6848<br>1.475 1.034<br>1.0649<br>0.2408<br>0.6027                                                                                                                                                                            | 6 1.638<br>2 0.6388<br>8 1.134<br>2 0.6388          | 1.638 1.6448<br>0.6388 0.6334<br>1.134 1.0773<br>0.6334 0.6377                                                                                                    | 0.9782 1.0373<br>0.6323<br>1.0686<br>0.3751                                                                                                                       | 1.0373 2.9033<br>1.0878<br>1.1853<br>0.3751<br>1.0878 |
| ALBU_HUMAN  | Serum albumin OS=Homo sapiens GN=ALB PE=1 SV=2                                                    | KVPQVSTPLTVEVSR<br>LVTKLQ<br>ADGEVYK<br>ADGGRFFQVYK<br>ALANSLACQK<br>GGVGVK<br>GLAADISTGSIAK<br>VLAVYK<br>VFCQGGVAFKLVK<br>VASICQGGNVPVEPELFDGGIDLK                                                          | 3 0.8768<br>3 0.9999<br>1 1.0453<br>1 0.838<br>3 1.0429<br>1 1.4703<br>3 1.0078<br>1 1.1885<br>1 1.2574<br>3 1.0088                                                  | 0.8768 0.8762<br>0.9999 1.0075<br>1.0453 1.0453<br>0.838 0.838<br>1.0429 0.9395<br>1.4703 1.814<br>1.0078 0.9313<br>1.1885 1.1885<br>1.2574 2.439<br>1.0088 0.9842                                                                       | 2 0.6388<br>2 0.6388<br>8 1.134<br>2 0.6388         | 0.6388 0.6334<br>0.6377 0.6323<br>1.134 1.0773<br>0.6334 0.6377                                                                                                   | 0.9782 1.0373<br>0.6323<br>1.0686<br>0.3751                                                                                                                       | 1.0373 2.9033<br>1.0878<br>1.1853<br>0.3751<br>1.0878 |
| ALDOA_HUMAN | Fructose-bisphosphate aldolase A OS=Homo sapiens GN=ALDOA PE=1 SV=2                               | VASICQGGNVPVEPELFDGGIDLK<br>VLAAYK<br>VLAAYK<br>VLAAYK                                                                                                                                                       | 3 1.0088<br>1 1.1885<br>1 1.1885<br>1 1.0088                                                                                                                         | 0.9842 1.3066<br>1.1885 1.1885<br>1.1885 1.1885<br>0.9842 1.3066                                                                                                                                                                         | 2 1.0277<br>2 1.0277<br>2 1.0277                    | 1.0277 1.0247<br>1.0277 1.0277<br>1.0277 1.0277                                                                                                                   | 1.0885 1.9162<br>1.0885 1.0885<br>1.0885 1.0885                                                                                                                   |                                                       |
| AMP1_HUMAN  | Cytosol aminopyridase OS=Homo sapiens GN=AMP1 PE=1 SV=3                                           | IKLSSTIEPLK<br>SULFNCEVNTNNDYR<br>VSGGLVLEIK<br>VYDLEIK                                                                                                                                                      | 1 0.4188<br>1 12.0469<br>1 1.1835<br>1 1.1835                                                                                                                        | 0.4188 0.4188<br>12.0469 12.0469<br>1.1835 1.1835<br>1.1835 1.1835                                                                                                                                                                       | 2 3.8617<br>2 3.8617                                | 3.8617 3.8617<br>3.8617 3.8617                                                                                                                                    | 2.7564 2.7564<br>2.7564 2.7564                                                                                                                                    |                                                       |
| AN2A_HUMAN  | Acidic leucine-rich nuclear phosphoprotein 32 family member A OS=Homo sapiens GN=ANP32A PE=1 SV=1 | IKLSSTIEPLK<br>SULFNCEVNTNNDYR<br>VSGGLVLEIK<br>YDLEIK                                                                                                                                                       | 1 0.4188<br>1 12.0469<br>1 1.1835<br>1 1.1835                                                                                                                        | 0.4188 0.4188<br>12.0469 12.0469<br>1.1835 1.1835<br>1.1835 1.1835                                                                                                                                                                       | 2 3.8617<br>2 3.8617                                | 3.8617 3.8617<br>3.8617 3.8617                                                                                                                                    | 2.7564 2.7564<br>2.7564 2.7564                                                                                                                                    |                                                       |
| AN2B_HUMAN  | Acidic leucine-rich nuclear phosphoprotein 32 family member B OS=Homo sapiens GN=ANP32B PE=1 SV=1 | IKLSSTIEPLK<br>SULFNCEVNTNNDYR<br>VSGGLVLEIK<br>YDLEIK                                                                                                                                                       | 1 0.4188<br>1 12.0469<br>1 1.1835<br>1 1.1835                                                                                                                        | 0.4188 0.4188<br>12.0469 12.0469<br>1.1835 1.1835<br>1.1835 1.1835                                                                                                                                                                       | 2 3.8617<br>2 3.8617                                | 3.8617 3.8617<br>3.8617 3.8617                                                                                                                                    | 2.7564 2.7564<br>2.7564 2.7564                                                                                                                                    |                                                       |
| AN2C_HUMAN  | Acidic leucine-rich nuclear phosphoprotein 32 family member C OS=Homo sapiens GN=ANP32C PE=2 SV=1 | IKLSSTIEPLK<br>SULFNCEVNTNNDYR<br>VSGGLVLEIK<br>YDLEIK                                                                                                                                                       | 1 0.4188<br>1 12.0469<br>1 1.1835<br>1 1.1835                                                                                                                        | 0.4188 0.4188<br>12.0469 12.0469<br>1.1835 1.1835<br>1.1835 1.1835                                                                                                                                                                       | 2 3.8617<br>2 3.8617                                | 3.8617 3.8617<br>3.8617 3.8617                                                                                                                                    | 2.7564 2.7564<br>2.7564 2.7564                                                                                                                                    |                                                       |
| AN2D_HUMAN  | Acidic leucine-rich nuclear phosphoprotein 32 family member D OS=Homo sapiens GN=ANP32D PE=1 SV=2 | IKLSSTIEPLK<br>SULFNCEVNTNNDYR<br>VSGGLVLEIK<br>YDLEIK                                                                                                                                                       | 1 0.4188<br>1 12.0469<br>1 1.1835<br>1 1.1835                                                                                                                        | 0.4188 0.4188<br>12.0469 12.0469<br>1.1835 1.1835<br>1.1835 1.1835                                                                                                                                                                       | 2 3.8617<br>2 3.8617                                | 3.8617 3.8617<br>3.8617 3.8617                                                                                                                                    | 2.7564 2.7564<br>2.7564 2.7564                                                                                                                                    |                                                       |
| ANH1_HUMAN  | Protein arginine N-methyltransferase 1 OS=Homo sapiens GN=PRMT1 PE=1 SV=2                         | IKLSSTIEPLK<br>SULFNCEVNTNNDYR<br>VSGGLVLEIK<br>YDLEIK                                                                                                                                                       | 1 0.4188<br>1 12.0469<br>1 1.1835<br>1 1.1835                                                                                                                        | 0.4188 0.4188<br>12.0469 12.0469<br>1.1835 1.1835<br>1.1835 1.1835                                                                                                                                                                       | 2 3.8617<br>2 3.8617                                | 3.8617 3.8617<br>3.8617 3.8617                                                                                                                                    | 2.7564 2.7564<br>2.7564 2.7564                                                                                                                                    |                                                       |
| ANXA1_HUMAN | Annexin A1 OS=Homo sapiens GN=ANXA1 PE=1 SV=2                                                     | QKSTLEELVLSKR<br>GVDEATIDLTAK<br>DALNETAK<br>SALSGLHLETVGLLK<br>1807T<br>DNLNDELK<br>EYVTFYAPTEAFK<br>ELANAK<br>GDELADSALEIFK<br>LTLALANSVFYK<br>QAKLQNSRSRER<br>SPVQLQHSR<br>WTFPMTDTEVGLK<br>VYHGHTLETLSGK | 1 0.9469<br>1 1.4233<br>1 1.8517<br>1 1.8517<br>1 1.8517<br>1 0.2969<br>1 7.5847<br>1 0.2969<br>3 0.2097<br>1 0.2969<br>1 0.2969<br>1 0.4119<br>1 0.3979<br>1 0.3191 | 0.9469 0.9469<br>1.4233 1.4233<br>1.8517 1.8517<br>1.8517 1.8517<br>1.8517 1.8517<br>0.2969 0.2969<br>7.5847 7.5847<br>0.2969 0.2969<br>0.2097 1.7646<br>0.2969 1.008<br>0.2969 1.008<br>0.4119 0.4119<br>0.3979 0.3979<br>0.3191 0.3191 | 2 1.886<br>2 1.886<br>2 1.886<br>2 1.886<br>2 1.886 | 1.886 1.886<br>1.886 1.886 | 1.628 1.628<br>1.628 1.628 |                                                       |
| ANXA2_HUMAN | Annexin A2 OS=Homo sapiens GN=ANXA2 PE=1 SV=2                                                     | DALNETAK<br>SALSGLHLETVGLLK<br>1807T<br>DNLNDELK<br>EYVTFYAPTEAFK<br>ELANAK<br>GDELADSALEIFK<br>LTLALANSVFYK<br>QAKLQNSRSRER<br>SPVQLQHSR<br>WTFPMTDTEVGLK<br>VYHGHTLETLSGK                                  | 1 1.8517<br>1 1.8517<br>1 1.8517<br>1 0.2969<br>1 7.5847<br>1 0.2969<br>3 0.2097<br>1 0.2969<br>1 0.2969<br>1 0.4119<br>1 0.3979<br>1 0.3191                         | 1.8517 1.8517<br>1.8517 1.8517<br>1.8517 1.8517<br>0.2969 0.2969<br>7.5847 7.5847<br>0.2969 0.2969<br>0.2097 1.7646<br>0.2969 1.008<br>0.2969 1.008<br>0.4119 0.4119<br>0.3979 0.3979<br>0.3191 0.3191                                   | 2 1.886<br>2 1.886<br>2 1.886<br>2 1.886<br>2 1.886 | 1.886 1.886<br>1.886 1.886 | 1.628 1.628<br>1.628 1.628 |                                                       |
| ANXA5_HUMAN | Annexin A5 OS=Homo sapiens GN=ANXA5 PE=1 SV=2                                                     | ETSGLDQLLVLAK<br>DAIHELK<br>DNLNDELK<br>EYVTFYAPTEAFK<br>ELANAK<br>GDELADSALEIFK<br>LTLALANSVFYK<br>QAKLQNSRSRER<br>SPVQLQHSR<br>WTFPMTDTEVGLK<br>VYHGHTLETLSGK                                              | 3 1.4606<br>1 1.0816<br>1 0.7753<br>1 0.7753<br>1 0.7753<br>1 0.2969<br>1 7.5847<br>1 0.2969<br>3 0.2097<br>1 0.2969<br>1 0.2969<br>1 0.4119<br>1 0.3979<br>1 0.3191 | 1.4606 1.4606<br>1.0816 1.0816<br>0.7753 0.7753<br>0.7753 0.7753<br>0.7753 0.7753<br>0.2969 0.2969<br>7.5847 7.5847<br>0.2969 0.2969<br>0.2097 1.7646<br>0.2969 1.008<br>0.2969 1.008<br>0.4119 0.4119<br>0.3979 0.3979<br>0.3191 0.3191 | 2 1.1384<br>2 1.1384<br>2 1.1384<br>2 1.1384        | 1.2995 1.0919<br>1.2995 1.0919<br>1.2995 1.0919<br>1.2995 1.0919                                                                                                  | 1.2629 1.2629<br>1.2629 1.2629<br>1.2629 1.2629<br>1.2629 1.2629                                                                                                  |                                                       |
| AP2A1_HUMAN | AP-2 complex subunit alpha 1 OS=Homo sapiens GN=AP2A1 PE=1 SV=3                                   | TSVQNGSPYVWPELPGDQVADIK<br>DAIQVQLVQK<br>DNLNDELK<br>EYVTFYAPTEAFK<br>ELANAK<br>GDELADSALEIFK<br>LTLALANSVFYK<br>QAKLQNSRSRER<br>SPVQLQHSR<br>WTFPMTDTEVGLK<br>VYHGHTLETLSGK                                 | 1 0.7753<br>1 0.2969<br>1 7.5847<br>1 0.2969<br>3 0.2097<br>1 0.2969<br>1 0.2969<br>1 0.4119<br>1 0.3979<br>1 0.3191                                                 | 0.7753 0.7753<br>0.2969 0.2969<br>7.5847 7.5847<br>0.2969 0.2969<br>0.2097 1.7646<br>0.2969 1.008<br>0.2969 1.008<br>0.4119 0.4119<br>0.3979 0.3979<br>0.3191 0.3191                                                                     | 2 1.1384<br>2 1.1384<br>2 1.1384<br>2 1.1384        | 1.2995 1.0919<br>1.2995 1.0919<br>1.2995 1.0919<br>1.2995 1.0919                                                                                                  | 1.2629 1.2629<br>1.2629 1.2629<br>1.2629 1.2629<br>1.2629 1.2629                                                                                                  |                                                       |
| AP3A1_HUMAN | Apoptosis inhibitor 3 OS=Homo sapiens GN=API3 PE=1 SV=2                                           | EQGLPVDAEVDVLEIK<br>VYDLEIK<br>DNLNDELK<br>EYVTFYAPTEAFK<br>ELANAK<br>GDELADSALEIFK<br>LTLALANSVFYK<br>QAKLQNSRSRER<br>SPVQLQHSR<br>WTFPMTDTEVGLK<br>VYHGHTLETLSGK                                           | 2 1.2631<br>1 0.8168<br>1 0.2969<br>1 7.5847<br>1 0.2969<br>3 0.2097<br>1 0.2969<br>1 0.2969<br>1 0.4119<br>1 0.3979<br>1 0.3191                                     | 1.2631 1.2631<br>0.8168 0.8168<br>0.2969 0.2969<br>7.5847 7.5847<br>0.2969 0.2969<br>0.2097 1.7646<br>0.2969 1.008<br>0.2969 1.008<br>0.4119 0.4119<br>0.3979 0.3979<br>0.3191 0.3191                                                    | 2 1.0659<br>2 1.0659                                | 1.0659 1.1182<br>1.0659 1.1182                                                                                                                                    | 1.1182 1.1182<br>1.1182 1.1182                                                                                                                                    |                                                       |
| ARF1_HUMAN  | ADP-ribosylation factor 1 OS=Homo sapiens GN=ARF1 PE=1 SV=2                                       | DNLNDELK<br>EYVTFYAPTEAFK<br>ELANAK<br>GDELADSALEIFK<br>LTLALANSVFYK<br>QAKLQNSRSRER<br>SPVQLQHSR<br>WTFPMTDTEVGLK<br>VYHGHTLETLSGK                                                                          | 1 0.2969<br>1 7.5847<br>1 0.2969<br>3 0.2097<br>1 0.2969<br>1 0.2969<br>1 0.4119<br>1 0.3979<br>1 0.3191                                                             | 0.2969 0.2969<br>7.5847 7.5847<br>0.2969 0.2969<br>0.2097 1.7646<br>0.2969 1.008<br>0.2969 1.008<br>0.4119 0.4119<br>0.3979 0.3979<br>0.3191 0.3191                                                                                      | 2 1.1384<br>2 1.1384                                | 1.2995 1.0919<br>1.2995 1.0919                                                                                                                                    | 1.2629 1.2629<br>1.2629 1.2629                                                                                                                                    |                                                       |
| ARF3_HUMAN  | ADP-ribosylation factor 3 OS=Homo sapiens GN=ARF3 PE=1 SV=2                                       | DNLNDELK<br>EYVTFYAPTEAFK<br>ELANAK<br>GDELADSALEIFK<br>LTLALANSVFYK<br>QAKLQNSRSRER<br>SPVQLQHSR<br>WTFPMTDTEVGLK<br>VYHGHTLETLSGK                                                                          | 1 0.2969<br>1 7.5847<br>1 0.2969<br>3 0.2097<br>1 0.2969<br>1 0.2969<br>1 0.4119<br>1 0.3979<br>1 0.3191                                                             | 0.2969 0.2969<br>7.5847 7.5847<br>0.2969 0.2969<br>0.2097 1.7646<br>0.2969 1.008<br>0.2969 1.008<br>0.4119 0.4119<br>0.3979 0.3979<br>0.3191 0.3191                                                                                      | 2 1.1384<br>2 1.1384                                | 1.2995 1.0919<br>1.2995 1.0919                                                                                                                                    | 1.2629 1.2629<br>1.2629 1.2629                                                                                                                                    |                                                       |
| ARF5_HUMAN  | ADP-ribosylation factor 5 OS=Homo sapiens GN=ARF5 PE=1 SV=2                                       | DNLNDELK<br>EYVTFYAPTEAFK<br>ELANAK<br>GDELADSALEIFK<br>LTLALANSVFYK<br>QAKLQNSRSRER<br>SPVQLQHSR<br>WTFPMTDTEVGLK<br>VYHGHTLETLSGK                                                                          | 1 0.2969<br>1 7.5847<br>1 0.2969<br>3 0.2097<br>1 0.2969<br>1 0.2969<br>1 0.4119<br>1 0.3979<br>1 0.3191                                                             | 0.2969 0.2969<br>7.5847 7.5847<br>0.2969 0.2969<br>0.2097 1.7646<br>0.2969 1.008<br>0.2969 1.008<br>0.4119 0.4119<br>0.3979 0.3979<br>0.3191 0.3191                                                                                      | 2 1.1384<br>2 1.1384                                | 1.2995 1.0919<br>1.2995 1.0919                                                                                                                                    | 1.2629 1.2629<br>1.2629 1.2629                                                                                                                                    |                                                       |
| ARPP1_HUMAN | Arp2/3 complex subunit 1 OS=Homo sapiens GN=ARPP1 PE=1 SV=2                                       | TSVQNGSPYVWPELPGDQVADIK<br>DAIQVQLVQK<br>DNLNDELK<br>EYVTFYAPTEAFK<br>ELANAK<br>GDELADSALEIFK<br>LTLALANSVFYK<br>QAKLQNSRSRER<br>SPVQLQHSR<br>WTFPMTDTEVGLK<br>VYHGHTLETLSGK                                 | 1 0.7753<br>1 0.2969<br>1 7.5847<br>1 0.2969<br>3 0.2097<br>1 0.2969<br>1 0.2969<br>1 0.4119<br>1 0.3979<br>1 0.3191                                                 | 0.7753 0.7753<br>0.2969 0.2969<br>7.5847 7.5847<br>0.2969 0.2969<br>0.2097 1.7646<br>0.2969 1.008<br>0.2969 1.008<br>0.4119 0.4119<br>0.3979 0.3979<br>0.3191 0.3191                                                                     | 2 1.1384<br>2 1.1384                                | 1.2995 1.0919<br>1.2995 1.0919                                                                                                                                    | 1.2629 1.2629<br>1.2629 1.2629                                                                                                                                    |                                                       |
| ARPP3_HUMAN | Arp2/3 complex subunit 3 OS=Homo sapiens GN=ARPP3 PE=1 SV=3                                       | TSVQNGSPYVWPELPGDQVADIK<br>DAIQVQLVQK<br>DNLNDELK<br>EYVTFYAPTEAFK<br>ELANAK<br>GDELADSALEIFK<br>LTLALANSVFYK<br>QAKLQNSRSRER<br>SPVQLQHSR<br>WTFPMTDTEVGLK<br>VYHGHTLETLSGK                                 | 1 0.7753<br>1 0.2969<br>1 7.5847<br>1 0.2969<br>3 0.2097<br>1 0.2969<br>1 0.2969<br>1 0.4119<br>1 0.3979<br>1 0.3191                                                 | 0.7753 0.7753<br>0.2969 0.2969<br>7.5847 7.5847<br>0.2969 0.2969<br>0.2097 1.7646<br>0.2969 1.008<br>0.2969 1.008<br>0.4119 0.4119<br>0.3979 0.3979<br>0.3191 0.3191                                                                     | 2 1.1384<br>2 1.1384                                | 1.2995 1.0919<br>1.2995 1.0919                                                                                                                                    | 1.2629 1.2629<br>1.2629 1.2629                                                                                                                                    |                                                       |
| ARPC3_HUMAN | Actin-related protein 2/3 complex subunit 3 OS=Homo sapiens GN=ARPC3 PE=1 SV=3                    | DNLNDELK<br>EYVTFYAPTEAFK<br>ELANAK<br>GDELADSALEIFK<br>LTLALANSVFYK<br>QAKLQNSRSRER<br>SPVQLQHSR<br>WTFPMTDTEVGLK<br>VYHGHTLETLSGK                                                                          | 1 0.2969<br>1 7.5847<br>1 0.2969<br>3 0.2097<br>1 0.2969<br>1 0.2969<br>1 0.4119<br>1 0.3979<br>1 0.3191                                                             | 0.2969 0.2969<br>7.5847 7.5847<br>0.2969 0.2969<br>0.2097 1.7646<br>0.2969 1.008<br>0.2969 1.008<br>0.4119 0.4119<br>0.3979 0.3979<br>0.3191 0.3191                                                                                      | 2 1.1384<br>2 1.1384                                | 1.2995 1.0919<br>1.2995 1.0919                                                                                                                                    | 1.2629 1.2629<br>1.2629 1.2629                                                                                                                                    |                                                       |
| ATK10_HUMAN | Atankin 10 OS=Homo sapiens GN=ATK10 PE=1 SV=2                                                     | DNLNDELK<br>EYVTFYAPTEAFK<br>ELANAK<br>GDELADSALEIFK<br>LTLALANSVFYK<br>QAKLQNSRSRER<br>SPVQLQHSR<br>WTFPMTDTEVGLK<br>VYHGHTLETLSGK                                                                          | 1 0.2969<br>1 7.5847<br>1 0.2969<br>3 0.2097<br>1 0.2969<br>1 0.2969<br>1 0.4119<br>1 0.3979<br>1 0.3191                                                             | 0.2969 0.2969<br>7.5847 7.5847<br>0.2969 0.2969<br>0.2097 1.7646<br>0.2969 1.008<br>0.2969 1.008<br>0.4119 0.4119<br>0.3979 0.3979<br>0.3191 0.3191                                                                                      | 2 1.1384<br>2 1.1384                                | 1.2995 1.0919<br>1.2995 1.0919                                                                                                                                    | 1.2629 1.2629<br>1.2629 1.2629                                                                                                                                    |                                                       |
| ATX2L_HUMAN | Ataxin-2-like protein 2 OS=Homo sapiens GN=ATX2L PE=1 SV=2                                        | DNLNDELK<br>EYVTFYAPTEAFK<br>ELANAK<br>GDELADSALEIFK<br>LTLALANSVFYK<br>QAKLQNSRSRER<br>SPVQLQHSR<br>WTFPMTDTEVGLK<br>VYHGHTLETLSGK                                                                          | 1 0.2969<br>1 7.5847<br>1 0.2969<br>3 0.2097<br>1 0.2969<br>1 0.2969<br>1 0.4119<br>1 0.3979<br>1 0.3191                                                             | 0.2969 0.2969<br>7.5847 7.5847<br>0.2969 0.2969<br>0.2097 1.7646<br>0.2969 1.008<br>0.2969 1.008<br>0.4119 0.4119<br>0.3979 0.3979<br>0.3191 0.3191                                                                                      | 2 1.1384<br>2 1.1384                                | 1.2995 1.0919<br>1.2995 1.0919                                                                                                                                    | 1.2629 1.2629<br>1.2629 1.2629                                                                                                                                    |                                                       |
| B2M2_HUMAN  | Beta-2-microglobulin OS=Homo sapiens GN=B2M2 PE=1 SV=1                                            | SFLNVCNRYGSHVSSVDLVK<br>WVLSLRSFK<br>AVYLDQVLEK<br>NYSVLEIK<br>DNLNDELK<br>EYVTFYAPTEAFK<br>ELANAK<br>GDELADSALEIFK<br>LTLALANSVFYK<br>QAKLQNSRSRER<br>SPVQLQHSR<br>WTFPMTDTEVGLK<br>VYHGHTLETLSGK           | 1 0.2969<br>1 7.5847<br>1 0.2969<br>3 0.2097<br>1 0.2969<br>1 0.2969<br>1 0.4119<br>1 0.3979<br>1 0.3191                                                             | 0.2969 0.2969<br>7.5847 7.5847<br>0.2969 0.2969<br>0.2097 1.7646<br>0.2969 1.008<br>0.2969 1.008<br>0.4119 0.4119<br>0.3979 0.3979<br>0.3191 0.3191                                                                                      | 2 1.1384<br>2 1.1384                                | 1.2995 1.0919<br>1.2995 1.0919                                                                                                                                    | 1.2629 1.2629<br>1.2629 1.2629                                                                                                                                    |                                                       |
| BAF_HUMAN   | Barrier-to-autointegration factor 1 OS=Homo sapiens GN=BAF1 PE=1 SV=1                             | DNLNDELK<br>EYVTFYAPTEAFK<br>ELANAK<br>GDELADSALEIFK<br>LTLALANSVFYK<br>QAKLQNSRSRER<br>SPVQLQHSR<br>WTFPMTDTEVGLK<br>VYHGHTLETLSGK                                                                          | 1 0.2969<br>1 7.5847<br>1 0.2969<br>3 0.2097<br>1 0.2969<br>1 0.2969<br>1 0.4119<br>1 0.3979<br>1 0.3191                                                             | 0.2969 0.2969<br>7.5847 7.5847<br>0.2969 0.2969<br>0.2097 1.7646<br>0.2969 1.008<br>0.2969 1.008<br>0.4119 0.4119<br>0.3979 0.3979<br>0.3191 0.3191                                                                                      | 2 1.1384<br>2 1.1384                                | 1.2995 1.0919<br>1.2995 1.0919                                                                                                                                    | 1.2629 1.2629<br>1.2629 1.2629                                                                                                                                    |                                                       |
| BAS1_HUMAN  | Basigin OS=Homo sapiens GN=BAS1 PE=1 SV=2                                                         | DNLNDELK<br>EYVTFYAPTEAFK<br>ELANAK<br>GDELADSALEIFK<br>LTLALANSVFYK<br>QAKLQNSRSRER<br>SPVQLQHSR<br>WTFPMTDTEVGLK<br>VYHGHTLETLSGK                                                                          | 1 0.2969<br>1 7.5847<br>1 0.2969<br>3 0.2097<br>1 0.2969<br>1 0.2969<br>1 0.4119<br>1 0.3979<br>1 0.3191                                                             | 0.2969 0.2969<br>7.5847 7.5847<br>0.2969 0.2969<br>0.2097 1.7646<br>0.2969 1.008<br>0.2969 1.008<br>0.4119 0.4119<br>0.3979 0.3979<br>0.3191 0.3191                                                                                      | 2 1.1384<br>2 1.1384                                | 1.2995 1.0919<br>1.2995 1.0919                                                                                                                                    | 1.2629 1.2629<br>1.2629 1.2629                                                                                                                                    |                                                       |
| BGAT1_HUMAN | Branched-chain amino acid aminotransferase, cytosolic OS=Homo sapiens GN=BCAT1 PE=1 SV=3          | ATLDFWKEELLEQQVLEK<br>DNLNDELK<br>EYVTFYAPTEAFK<br>ELANAK<br>GDELADSALEIFK<br>LTLALANSVFYK<br>QAKLQNSRSRER<br>SPVQLQHSR<br>WTFPMTDTEVGLK<br>VYHGHTLETLSGK                                                    | 1 2.7169<br>1 0.2969<br>1 7.5847<br>1 0.2969<br>3 0.2097<br>1 0.2969<br>1 0.2969<br>1 0.4119<br>1 0.3979<br>1 0.3191                                                 | 2.7169 2.7169<br>0.2969 0.2969<br>7.5847 7.5847<br>0.2969 0.2969<br>0.2097 1.7646<br>0.2969 1.008<br>0.2969 1.008<br>0.4119 0.4119<br>0.3979 0.3979<br>0.3191 0.3191                                                                     | 2 1.7169<br>2 1.7169                                | 1.7169 1.7169<br>1.7169 1.7169<br>1.7169 1.7169<br>1.7169 1.7169                                                                                                  | 1.7169 3.0053<br>3.0053 3.0053<br>3.0053 3.0053<br>3.0053 3.0053                                                                                                  |                                                       |
| BIGH_HUMAN  | Transforming growth factor-beta-induced protein g13 OS=Homo sapiens GN=BTG1                       |                                                                                                                                                                                                              |                                                                                                                                                                      |                                                                                                                                                                                                                                          |                                                     |                                                                                                                                                                   |                                                                                                                                                                   |                                                       |



CYTC\_HUMAN  
Cytactin-C OS=Homo sapiens GN=CST3 PE=1 SV=1

|                            |                                                                                                |         |         |         |         |         |         |         |         |         |        |
|----------------------------|------------------------------------------------------------------------------------------------|---------|---------|---------|---------|---------|---------|---------|---------|---------|--------|
| ALDFAVGEYNK                | 4                                                                                              | 0.4006  | 0.4001  | 1.0571  | 4       | 0.5065  | 0.5056  | 0.4652  | 0.4739  | 0.4556  | 1.5702 |
| ALDVRV                     | 1                                                                                              | 0.2807  | 0.2807  |         |         |         |         |         |         |         |        |
| LVGGPMDASVEEGEVR           | 2                                                                                              | 0.8176  | 0.8699  | 2.2451  |         |         |         |         |         |         |        |
| IQPNINQMPHFQYQPK           | 1                                                                                              | 0.3227  | 0.3227  |         |         |         |         |         |         |         |        |
| SVKQGTVEFEYVVEK            | 1                                                                                              | 0.8601  | 0.8601  |         | 1       | 0.8601  | 0.8601  | 0.8601  | 0.8601  | 0.8601  |        |
| EAGLAPYRFAK                | 1                                                                                              | 1.313   | 1.313   | 1.313   | 1.313   | 1.313   | 1.313   | 1.313   | 1.313   | 1.313   |        |
| EIAQQGQVAVDQYDK            | 1                                                                                              | 0.4128  | 0.4128  |         | 1       | 0.4128  | 0.4128  | 0.4128  | 0.4128  | 0.4128  |        |
| GLKATVYVDFGRPK             | 1                                                                                              | 0.8201  | 0.8201  |         | 1       | 0.8201  | 0.8201  | 0.8201  | 0.8201  | 0.8201  |        |
| DSLAVLSLVK                 | 1                                                                                              | 1.1251  | 1.1251  |         | 1       | 1.1251  | 1.1251  | 1.1251  | 1.1251  | 1.1251  |        |
| EYQDLNLYK                  | 4                                                                                              | 1.4457  | 1.4104  | 1.2911  | 5       | 1.2623  | 1.2656  | 1.2518  | 1.272   | 1.2584  | 1.157  |
| ILKLEGEER                  | 1                                                                                              | 1.2487  | 1.2487  |         |         |         |         |         |         |         |        |
| LLEGEER                    | 2                                                                                              | 1.4361  | 1.4267  | 1.1758  |         |         |         |         |         |         |        |
| TNKEVLEQELNDR              | 3                                                                                              | 1.0283  | 1.0283  | 1.0811  |         |         |         |         |         |         |        |
| VEIQENLR                   | 1                                                                                              | 1.1529  | 1.1529  |         |         |         |         |         |         |         |        |
| MIASSL                     | 1                                                                                              | 1.1257  | 1.1257  |         | 1       | 1.1257  | 1.1257  | 1.1257  | 1.1257  | 1.1257  |        |
| DDGDELLE                   | 2                                                                                              | 3.1189  | 1.1259  | 10.6587 | 8       | 0.7956  | 0.9635  | 0.4672  | 0.5524  | 0.4324  | 2.6389 |
| DGGCGQLVWGHCTK             | 1                                                                                              | 0.3743  | 0.3743  |         |         |         |         |         |         |         |        |
| EVELMEDTQH                 | 1                                                                                              | 0.1997  | 0.1997  |         |         |         |         |         |         |         |        |
| LLLIWELPEEGDGR             | 0                                                                                              | 0.333   | 0.3329  | 1.009   |         |         |         |         |         |         |        |
| QELDELFR                   | 2                                                                                              | 0.4578  | 0.4193  | 0.8249  |         |         |         |         |         |         |        |
| SAFEMAEAAAK                | 1                                                                                              | 0.302   | 0.302   |         |         |         |         |         |         |         |        |
| STINPPTTGYASLMSFLK         | 1                                                                                              | 3.5782  | 3.5782  |         | 1       | 3.5782  | 3.5782  | 3.5782  | 3.5782  | 3.5782  |        |
| EYDFQFGEGLK                | 1                                                                                              | 0.2932  | 0.2932  |         | 1       | 0.2932  | 0.2932  | 0.2932  | 0.2932  | 0.2932  |        |
| ISLEDFQAVK                 | 1                                                                                              | 2.3861  | 2.3861  |         | 1       | 2.3861  | 2.3861  | 2.3861  | 2.3861  | 2.3861  |        |
| GYYDQRPVQVDFPK             | 1                                                                                              | 0.8201  | 0.8201  |         | 2       | 3.9852  | 7.3052  | 4.3117  | 4.3117  | 4.3117  | 4.9811 |
| GSPVLYVGGK                 | 1                                                                                              | 13.3811 | 13.3811 |         |         |         |         |         |         |         |        |
| GMIYVDFVGGTK               | 1                                                                                              | 0.0258  | 0.0258  |         | 1       | 0.0258  | 0.0258  | 0.0258  | 0.0258  | 0.0258  |        |
| QLLAAQVK                   | 1                                                                                              | 0.8972  | 0.8972  |         | 1       | 0.8972  | 0.8972  | 0.8972  | 0.8972  | 0.8972  |        |
| GMVDFVDFGK                 | 1                                                                                              | 0.0258  | 0.0258  |         | 1       | 0.0258  | 0.0258  | 0.0258  | 0.0258  | 0.0258  |        |
| QLLAAQVK                   | 1                                                                                              | 0.8972  | 0.8972  |         | 1       | 0.8972  | 0.8972  | 0.8972  | 0.8972  | 0.8972  |        |
| QLQLNLAASAAGK              | 1                                                                                              | 0.3293  | 0.3293  |         | 1       | 0.3293  | 0.3293  | 0.3293  | 0.3293  | 0.3293  |        |
| BLAKMK                     | 1                                                                                              | 0.7743  | 0.7743  |         | 1       | 0.7743  | 0.7743  | 0.7743  | 0.7743  | 0.7743  |        |
| ALNALQSGLPK                | 1                                                                                              | 3.6241  | 3.6241  |         | 1       | 3.6241  | 3.6241  | 3.6241  | 3.6241  | 3.6241  |        |
| DLITDGR                    | 2                                                                                              | 3.0705  | 1.3927  | 7.5328  | 4       | 1.137   | 1.3268  | 0.7607  | 0.8402  | 0.6376  | 2.621  |
| DYVFAISR                   | 1                                                                                              | 0.827   | 0.827   |         |         |         |         |         |         |         |        |
| NVALVSGTDSAK               | 2                                                                                              | 0.9421  | 0.3298  | 1.474   |         |         |         |         |         |         |        |
| VTPMMSLQGNDR               | 1                                                                                              | 0.5286  | 0.5286  |         |         |         |         |         |         |         |        |
| EALMTEFLK                  | 1                                                                                              | 0.1569  | 0.1569  |         | 1       | 0.1569  | 0.1569  | 0.1569  | 0.1569  | 0.1569  |        |
| MDSTPEYSPK                 | 1                                                                                              | 0.1932  | 0.1932  |         | 4       | 0.0951  | 1.0414  | 0.759   | 0.7915  | 0.7843  | 2.9395 |
| SDDAAMDVMPKPMCVFESDYPPPLGR | 2                                                                                              | 0.571   | 0.5662  | 1.2012  |         |         |         |         |         |         |        |
| STTTGHLVTK                 | 1                                                                                              | 1.2074  | 1.212   | 1.3168  |         |         |         |         |         |         |        |
| THINVVVGVDSGK              | 1                                                                                              | 2.3187  | 2.3187  |         |         |         |         |         |         |         |        |
| STTTGHLVTK                 | 2                                                                                              | 1.2074  | 1.212   | 1.3168  | 2       | 1.808   | 1.6378  | 1.7344  | 1.5744  | 1.5548  | 1.5077 |
| THINVVVGVDSGK              | 1                                                                                              | 2.3187  | 2.3187  |         |         |         |         |         |         |         |        |
| EVSYTK                     | 1                                                                                              | 1.2376  | 1.2376  |         | 2       | 1.5019  | 1.5019  | 1.4785  | 1.4785  | 1.4785  | 1.2859 |
| QTVGK                      | 1                                                                                              | 0.827   | 0.827   |         |         |         |         |         |         |         |        |
| SPAGLQVNDYLAJK             | 2                                                                                              | 0.8044  | 0.8027  | 1.0978  | 1       | 0.8044  | 0.8044  | 0.8044  | 0.8044  | 0.8027  |        |
| GVOYVQAAQK                 | 1                                                                                              | 0.8705  | 0.8705  |         | 2       | 0.7765  | 0.7452  | 0.7708  | 0.7402  | 0.7629  | 1.877  |
| QGLQGVVQAAK                | 0                                                                                              | 0.8525  | 0.8525  | 1.0415  |         |         |         |         |         |         |        |
| AVLGEVK                    | 2                                                                                              | 37.9179 | 37.0701 | 1.3524  | 3       | 13.2883 | 15.7848 | 3.1497  | 4.2718  | 4.2218  | 8.763  |
| LLGLDVALK                  | 2                                                                                              | 1.2006  | 1.1924  | 1.1798  |         |         |         |         |         |         |        |
| YSNGDTTSLVLYVDFHK          | 1                                                                                              | 0.8964  | 0.8964  |         |         |         |         |         |         |         |        |
| EGPILDNFLDKL               | 3                                                                                              | 0.8285  | 0.8288  | 1.0814  | 8       | 0.8212  | 0.798   | 0.8003  | 0.8287  | 0.824   | 2.915  |
| IEVSEINLVLSLK              | 1                                                                                              | 1.9174  | 1.9174  |         |         |         |         |         |         |         |        |
| GPLMYRDK                   | 1                                                                                              | 0.8997  | 0.8997  |         |         |         |         |         |         |         |        |
| GVOYVLEK                   | 1                                                                                              | 1.156   | 1.156   |         |         |         |         |         |         |         |        |
| HWFGDFGTGPNLDTTK           | 2                                                                                              | 0.2074  | 0.2158  | 1.349   |         |         |         |         |         |         |        |
| STLDSLVK                   | 1                                                                                              | 0.0448  | 0.0448  |         |         |         |         |         |         |         |        |
| TFQDLDFPK                  | 1                                                                                              | 0.3941  | 0.3941  |         |         |         |         |         |         |         |        |
| YFVAMNYK                   | 1                                                                                              | 0.8253  | 0.8253  |         |         |         |         |         |         |         |        |
| VFGSLVSTGLK                | 1                                                                                              | 0.0799  | 0.0799  |         |         |         |         |         |         |         |        |
| DFDFLEK                    | 1                                                                                              | 2.5958  | 2.5958  |         | 1       | 2.5958  | 2.5958  | 2.5958  | 2.5958  | 2.5958  |        |
| DDFMLEK                    | 1                                                                                              | 2.5958  | 2.5958  |         | 1       | 2.5958  | 2.5958  | 2.5958  | 2.5958  | 2.5958  |        |
| DDFMLEK                    | 1                                                                                              | 2.5958  | 2.5958  |         | 1       | 2.5958  | 2.5958  | 2.5958  | 2.5958  | 2.5958  |        |
| DMKDEFTLLSLEAK             | 1                                                                                              | 2.1186  | 2.1186  |         | 1       | 2.1186  | 2.1186  | 2.1186  | 2.1186  | 2.1186  |        |
| CGKQDFEAFDLSLEAK           | 2                                                                                              | 1.8511  | 1.8481  | 1.1084  | 1       | 1.8511  | 1.8511  | 1.8511  | 1.8511  | 1.8511  |        |
| LVKLSHIHEAWAHR             | 1                                                                                              | 3.4033  | 3.4033  |         | 1       | 3.4033  | 3.4033  | 3.4033  | 3.4033  | 3.4033  |        |
| GLEGAQAAGCCPSLEGR          | 1                                                                                              | 0.1979  | 0.1979  |         | 3       | 0.1358  | 0.1358  | 0.0777  | 0.0777  | 0.0777  | 0.5419 |
| ADVFLEK                    | 1                                                                                              | 0.017   | 0.017   |         |         |         |         |         |         |         |        |
| DATLEGVEWIK                | 1                                                                                              | 0.1976  | 0.1976  |         |         |         |         |         |         |         |        |
| AVENHK                     | 1                                                                                              | 0.2388  | 0.2388  |         | 17      | 2.4829  | 2.7343  | 1.0005  | 1.1471  | 1.0025  | 2.164  |
| DATNVEGDFGNPLENK           | 1                                                                                              | 0.3882  | 0.3882  |         |         |         |         |         |         |         |        |
| DYVVVFDFPQDQGWAK           | 1                                                                                              | 0.4833  | 0.4833  |         |         |         |         |         |         |         |        |
| EGLELLK                    | 3                                                                                              | 1.0722  | 0.9702  | 1.1720  |         |         |         |         |         |         |        |
| FGANALVSLVAJK              | 2                                                                                              | 1.1378  | 1.107   | 1.2594  | 3       | 0.7989  | 0.8502  | 0.7544  | 0.8189  | 0.8121  | 1.5298 |
| FTASAGVYDGLVTPNK           | 1                                                                                              | 0.7875  | 0.7875  |         |         |         |         |         |         |         |        |
| GNFTEVLYTVK                | 3                                                                                              | 0.7912  | 0.785   | 1.1654  |         |         |         |         |         |         |        |
| HIADLQNSLVLPVAFVNVGGSHAGNK | 1                                                                                              | 0.6262  | 0.6262  |         |         |         |         |         |         |         |        |
| EKLMEGDTEK                 | 1                                                                                              | 0.8868  | 0.8868  |         |         |         |         |         |         |         |        |
| KEELQK                     | 2                                                                                              | 0.897   | 0.8184  | 1.6211  |         |         |         |         |         |         |        |
| IGAEVYVNLK                 | 1                                                                                              | 1.4895  | 1.4895  |         |         |         |         |         |         |         |        |
| KLVNFQK                    | 1                                                                                              | 0.7935  | 0.7935  |         |         |         |         |         |         |         |        |
| LMEMGDTEK                  | 3                                                                                              | 2.4166  | 1.8881  | 2.7512  |         |         |         |         |         |         |        |
| SFKYVSSDFPQDQGWAK          | 1                                                                                              | 1.1202  | 1.1202  |         |         |         |         |         |         |         |        |
| TRAPVSLK                   | 4                                                                                              | 1.0982  | 0.8944  | 1.8477  |         |         |         |         |         |         |        |
| VNQSIVTESGACK              | 2                                                                                              | 27.4002 | 9.8563  | 10.7807 |         |         |         |         |         |         |        |
| YSRDLQK                    | 3                                                                                              | 0.148   | 0.148   | 1.2077  |         |         |         |         |         |         |        |
| FGANALVSLVAJK              | 2                                                                                              | 1.1218  | 1.107   | 1.2594  | 5       | 4.7818  | 1.7053  | 1.9765  | 3       | 1.9003  | 3.9097 |
| HIADLQNSLVLPVAFVNVGGSHAGNK | 2                                                                                              | 1.6343  | 1.3243  | 2.5846  |         |         |         |         |         |         |        |
| LAKVNSGK                   | 1                                                                                              | 1.8027  | 1.8027  |         |         |         |         |         |         |         |        |
| SETETEDLIVLVGLTGQK         | 1                                                                                              | 0.4838  | 0.4838  |         |         |         |         |         |         |         |        |
| VNQSIVTESGACK              | 1                                                                                              | 18.9584 | 5.9916  | 7.0088  |         |         |         |         |         |         |        |
| FGANALVSLVAJK              | 2                                                                                              | 1.1218  | 1.107   | 1.2594  | 3       | 0.7989  | 0.8502  | 0.7544  | 0.8189  | 0.8121  | 1.5298 |
| GNFTEVLYTVK                | 3                                                                                              | 0.7912  | 0.785   | 1.1654  |         |         |         |         |         |         |        |
| SETETEDLIVLVGLTGQK         | 1                                                                                              | 0.4838  | 0.4838  |         |         |         |         |         |         |         |        |
| ENPL_HUMAN                 | Endoplasmic OS=Homo sapiens GN=HSR90B1 PE=1 SV=1                                               | 3       | 0.9544  | 0.9421  | 1.2161  | 1       | 0.9544  | 0.9544  | 0.9544  | 0.9544  | 0.9421 |
| EPICR_HUMAN                | Endothelial protein C receptor OS=Homo sapiens GN=PROCR PE=1 SV=1                              | 2       | 0.397   | 0.3884  | 1.2052  | 1       | 0.997   | 0.997   | 0.997   | 0.997   | 0.9824 |
| ERF_HUMAN                  | Eukaryotic peptide chain release factor subunit 1 OS=Homo sapiens GN=ETP1 PE=1 SV=3            | 1       | 3.2207  | 3.2207  |         | 1       | 6.8655  | 6.8395  | 6.7124  | 6.7124  | 8.2127 |
| ERH_HUMAN                  | Enhancer of rudimentary homolog OS=Homo sapiens GN=ERH1 PE=1 SV=1                              | 1       | 15.9462 | 15.9462 |         |         |         |         |         |         |        |
| ERTY3_HUMAN                | Extended synaptotagmin 3 OS=Homo sapiens GN=ERTY3 PE=2 SV=1                                    | 1       | 1.0873  | 1.0873  |         | 1       | 1.0873  | 1.0873  | 1.0873  | 1.0873  |        |
| EVS_HUMAN                  | Extended synaptotagmin 3 OS=Homo sapiens GN=ERTY3 PE=2 SV=1                                    | 1       | 0.8263  | 0.8263  |         | 1       | 0.8263  | 0.8263  | 0.8263  | 0.8263  |        |
| EVS_HUMAN                  | Eukaryotic viral integration site 6 protein homolog OS=Homo sapiens GN=EVI6 PE=1 SV=2          | 2       | 1.0639  | 1.0639  | 1.1843  | 1       | 1.0639  | 1.0639  | 1.0639  | 1.0639  |        |
| EWIS_HUMAN                 | RNA-binding protein EWS OS=Homo sapiens GN=EWRS1 PE=1 SV=1                                     | 1       | 5.8997  | 5.8997  |         | 1       | 5.8997  | 5.8997  | 5.8997  | 5.8997  |        |
| EWIS_HUMAN                 | Enrin OS=Homo sapiens GN=ER2 PE=1 SV=4                                                         | 1       | 0.7636  | 0.7636  |         | 3       | 1.2479  | 1.2431  | 1.152   | 1.3137  | 1.2845 |
| FI0A1_HUMAN                | Hsc70-interacting protein OS=Homo sapiens GN=ST13 PE=1 SV=2                                    | 1       | 1.0424  | 1.0424  |         | 1       | 1.0424  | 1.0424  | 1.0424  | 1.0424  |        |
| FI0A1_HUMAN                | Protein FAM104A OS=Homo sapiens GN=FAM104A PE=1 SV=1                                           | 2       | 1.9488  | 1.9488  |         | 1       | 1.9488  | 1.9488  | 1.9488  | 1.9488  |        |
| FI0A1_HUMAN                | Protein FAM104S OS=Homo sapiens GN=FAM104S PE=1 SV=1                                           | 2       | 2.774   | 2.6552  | 1.496   | 4       | 2.2438  | 2.3469  | 1.4668  | 1.8691  | 1.8307 |
| FI0A1_HUMAN                | Protein FAM104S OS=Homo sapiens GN=FAM104S PE=1 SV=1                                           | 1       | 4.8865  | 4.8865  |         | 2       | 1.8663  | 2.1089  | 1.6307  | 1.9467  | 1.8954 |
| FI0A1_HUMAN                | Protein FAM104S OS=Homo sapiens GN=FAM104S PE=1 SV=1                                           | 1       | 0.9586  | 0.9586  |         |         |         |         |         |         |        |
| FABP5_HUMAN                | Fatty acid-binding protein, epididymal OS=Homo sapiens GN=FBP5 PE=1 SV=3                       | 2       | 15.6506 | 4.8796  | 14.2235 | 2       | 8.3137  | 10.7594 | 3.9101  | 6.2083  | 2.776  |
| FAK2_HUMAN                 | FAST kinase domain-containing protein 2 OS=Homo sapiens GN=FAK2K2 PE=1 SV=1                    | 2       | 15.6506 | 4.8796  | 14.2235 | 2       | 15.6506 | 15.6506 | 15.6506 | 15.6506 | 4.8796 |
| FBIS3_HUMAN                | Putative fatty acid-binding protein 5-like protein 3 OS=Homo sapiens GN=FBIS3 PE=1 SV=1        | 1       | 1.211   | 1.211   |         | 4       | 0.4818  | 0.4818  | 0.6112  | 0.6112  | 0.4378 |
| FBIN1_HUMAN                | Fibulin-1 OS=Homo sapiens GN=FBIN1 PE=1 SV=4                                                   | 1       | 0.475   | 0.475   |         |         |         |         |         |         |        |
| FBIN1_HUMAN                | Fibulin-1 OS=Homo sapiens GN=FBIN1 PE=1 SV=2                                                   | 1       | 0.8709  | 0.8709  |         |         |         |         |         |         |        |
| FBIN1_HUMAN                | Fibulin-1 OS=Homo sapiens GN=FBIN1 PE=1 SV=2                                                   | 1       | 0.8081  | 0.8081  |         |         |         |         |         |         |        |
| FBIN1_HUMAN                | Fibulin-1 OS=Homo sapiens GN=FBIN1 PE=1 SV=2                                                   | 1       | 14.1919 | 14.1919 |         |         |         |         |         |         |        |
| FBIN1_HUMAN                | Fibulin-1 OS=Homo sapiens GN=FBIN1 PE=1 SV=2                                                   | 1       | 0.7056  | 0.7056  |         |         |         |         |         |         |        |
| FBIN1_HUMAN                | Fibulin-1 OS=Homo sapiens GN=FBIN1 PE=1 SV=2                                                   | 1       | 0.5987  | 0.5987  |         |         |         |         |         |         |        |
| FBIN1_HUMAN                | Fibulin-1 OS=Homo sapiens GN=FBIN1 PE=1 SV=2                                                   | 1       | 0.5844  | 0.5844  |         |         |         |         |         |         |        |
| FBIN1_HUMAN                | Fibulin-1 OS=Homo sapiens GN=FBIN1 PE=1 SV=2                                                   | 1       | 22.815  | 22.815  |         |         |         |         |         |         |        |
| FBIN1_HUMAN                | Fibulin-1 OS=Homo sapiens GN=FBIN1 PE=1 SV=2                                                   | 1       | 6.3096  | 6.3096  |         |         |         |         |         |         |        |
| FBIN3_HUMAN                | EGF-containing fibulin-like extracellular matrix protein 1 OS=Homo sapiens GN=EFEMP1 PE=1 SV=2 | 2       | 0.4017  | 0.4015  | 1.0487  | 10      | 0.3684  | 0.3839  | 0.3561  | 0.3765  | 0.3616 |
| FBIN3_HUMAN                | EGF-containing fibulin-like extracellular matrix protein 1 OS=Homo sapiens GN=EFEMP1 PE=1 SV=2 | 2       | 0.4     |         |         |         |         |         |         |         |        |





|             |                                                                             |                                  |   |        |        |       |    |        |        |        |        |        |
|-------------|-----------------------------------------------------------------------------|----------------------------------|---|--------|--------|-------|----|--------|--------|--------|--------|--------|
| K1C13_HUMAN | Keratin, type I cytoskeletal 13 OS=Homo sapiens GNHRK13 PE=1 SV=3           | VLDLTLR                          | 1 | 6.5176 | 6.5176 |       |    |        |        |        |        |        |
| K1C14_HUMAN | Keratin, type I cytoskeletal 14 OS=Homo sapiens GNHRK14 PE=1 SV=4           | QSVEADINSLR                      | 1 | 0.6868 | 0.6868 |       |    |        |        |        |        |        |
|             |                                                                             | QSVIADINSLR                      | 2 | 0.6848 | 0.6848 | 13832 | 2  | 0.7668 | 0.7665 | 0.7638 | 0.7868 |        |
|             |                                                                             | ADLEMDIQLKELIALK                 | 1 | 0.0209 | 0.0209 |       | 7  | 2.5034 | 1.9912 | 0.8573 | 0.8384 | 0.8371 |
|             |                                                                             | ASLENSLEETK                      | 1 | 9.1222 | 9.1222 |       |    |        |        |        |        |        |
|             |                                                                             | ISSVLVAGGSCR                     | 1 | 5.3282 | 5.3282 |       |    |        |        |        |        |        |
| K1C15_HUMAN | Keratin, type I cytoskeletal 15 OS=Homo sapiens GNHRK15 PE=1 SV=2           | LAADDFR                          | 2 | 0.8198 | 0.8178 | 11032 | 3  | 0.7579 | 0.7765 | 0.7548 | 0.7742 |        |
|             |                                                                             | LASYLDK                          | 2 | 0.789  | 0.7848 | 11568 |    |        |        |        |        |        |
|             |                                                                             | VLDLTLR                          | 1 | 0.665  | 0.665  |       |    |        |        |        |        |        |
|             |                                                                             | VTMQLNDR                         | 2 | 0.7791 | 0.779  | 10012 |    |        |        |        |        |        |
|             |                                                                             | LAADDFR                          | 2 | 0.8198 | 0.8178 | 11032 | 3  | 0.7579 | 0.7765 | 0.7548 | 0.7742 |        |
| K1C16_HUMAN | Keratin, type I cytoskeletal 16 OS=Homo sapiens GNHRK16 PE=1 SV=4           | ASLENSLEETK                      | 1 | 9.1222 | 9.1222 |       | 6  | 2.9172 | 2.2101 | 1.5621 | 1.2635 |        |
|             |                                                                             | ISSVLVAGGSCR                     | 1 | 5.3282 | 5.3282 |       |    |        |        |        |        |        |
|             |                                                                             | LAADDFR                          | 2 | 0.8198 | 0.8178 | 11032 |    |        |        |        |        |        |
|             |                                                                             | LASYLDK                          | 2 | 0.789  | 0.7848 | 11568 |    |        |        |        |        |        |
|             |                                                                             | VLDLTLR                          | 1 | 0.665  | 0.665  |       |    |        |        |        |        |        |
| K1C17_HUMAN | Keratin, type I cytoskeletal 17 OS=Homo sapiens GNHRK17 PE=1 SV=2           | LAADDFR                          | 2 | 0.8198 | 0.8178 | 11032 | 3  | 0.7579 | 0.7765 | 0.7548 | 0.7742 |        |
|             |                                                                             | LASYLDK                          | 2 | 0.789  | 0.7848 | 11568 |    |        |        |        |        |        |
|             |                                                                             | VLDLTLR                          | 1 | 0.665  | 0.665  |       |    |        |        |        |        |        |
|             |                                                                             | VTMQLNDR                         | 2 | 0.7791 | 0.779  | 10012 |    |        |        |        |        |        |
|             |                                                                             | LAADDFR                          | 2 | 0.8198 | 0.8178 | 11032 | 3  | 0.7579 | 0.7765 | 0.7548 | 0.7742 |        |
| K1C18_HUMAN | Keratin, type I cytoskeletal 18 OS=Homo sapiens GNHRK18 PE=1 SV=2           | LAADDFR                          | 2 | 0.8198 | 0.8178 | 11032 | 2  | 0.4528 | 0.5751 | 0.2854 | 0.3865 |        |
|             |                                                                             | VTMQLNDR                         | 1 | 0.665  | 0.665  |       |    |        |        |        |        |        |
|             |                                                                             | LAADDFR                          | 2 | 0.8198 | 0.8178 | 11032 | 3  | 0.7579 | 0.7765 | 0.7548 | 0.7742 |        |
|             |                                                                             | LASYLDK                          | 2 | 0.789  | 0.7848 | 11568 |    |        |        |        |        |        |
|             |                                                                             | VLDLTLR                          | 1 | 0.665  | 0.665  |       |    |        |        |        |        |        |
| K1C19_HUMAN | Keratin, type I cytoskeletal 19 OS=Homo sapiens GNHRK19 PE=1 SV=3           | LAADDFR                          | 2 | 0.8198 | 0.8178 | 11032 | 3  | 0.7579 | 0.7765 | 0.7548 | 0.7742 |        |
|             |                                                                             | LASYLDK                          | 2 | 0.789  | 0.7848 | 11568 |    |        |        |        |        |        |
|             |                                                                             | VLDLTLR                          | 1 | 0.665  | 0.665  |       |    |        |        |        |        |        |
|             |                                                                             | VTMQLNDR                         | 2 | 0.7791 | 0.779  | 10012 |    |        |        |        |        |        |
|             |                                                                             | LAADDFR                          | 2 | 0.8198 | 0.8178 | 11032 | 3  | 0.7579 | 0.7765 | 0.7548 | 0.7742 |        |
| K1C20_HUMAN | Keratin, type I cytoskeletal 20 OS=Homo sapiens GNHRK20 PE=1 SV=1           | MAAMQNLDR                        | 1 | 0.8007 | 0.8007 |       | 1  | 0.8007 | 0.8007 | 0.8007 | 0.8007 |        |
|             |                                                                             | LAADDFR                          | 2 | 0.8198 | 0.8178 | 11032 | 3  | 0.7579 | 0.7765 | 0.7548 | 0.7742 |        |
|             |                                                                             | QSVIADINSLR                      | 1 | 0.6868 | 0.6868 |       |    |        |        |        |        |        |
|             |                                                                             | QSVEADINSLR                      | 1 | 0.6848 | 0.6848 |       |    |        |        |        |        |        |
|             |                                                                             | VLDLTLR                          | 1 | 0.665  | 0.665  |       |    |        |        |        |        |        |
| K1C25_HUMAN | Keratin, type I cytoskeletal 25 OS=Homo sapiens GNHRK25 PE=1 SV=1           | DAEAWFNK                         | 2 | 0.9172 | 0.9156 | 10881 | 2  | 0.8481 | 0.8481 | 0.8453 | 0.8453 |        |
|             |                                                                             | VTMQLNDR                         | 2 | 0.7791 | 0.779  | 10012 |    |        |        |        |        |        |
|             |                                                                             | DAEAWFNK                         | 2 | 0.9172 | 0.9156 | 10881 | 2  | 0.8481 | 0.8481 | 0.8453 | 0.8453 |        |
|             |                                                                             | VTMQLNDR                         | 2 | 0.7791 | 0.779  | 10012 |    |        |        |        |        |        |
|             |                                                                             | DAEAWFNK                         | 2 | 0.9172 | 0.9156 | 10881 | 2  | 0.8481 | 0.8481 | 0.8453 | 0.8453 |        |
| K1C27_HUMAN | Keratin, type I cytoskeletal 27 OS=Homo sapiens GNHRK27 PE=1 SV=1           | DAEAWFNK                         | 2 | 0.9172 | 0.9156 | 10881 | 2  | 0.8481 | 0.8481 | 0.8453 | 0.8453 |        |
|             |                                                                             | VTMQLNDR                         | 2 | 0.7791 | 0.779  | 10012 |    |        |        |        |        |        |
|             |                                                                             | DAEAWFNK                         | 2 | 0.9172 | 0.9156 | 10881 | 2  | 0.8481 | 0.8481 | 0.8453 | 0.8453 |        |
|             |                                                                             | VTMQLNDR                         | 2 | 0.7791 | 0.779  | 10012 |    |        |        |        |        |        |
|             |                                                                             | DAEAWFNK                         | 2 | 0.9172 | 0.9156 | 10881 | 2  | 0.8481 | 0.8481 | 0.8453 | 0.8453 |        |
| K1C28_HUMAN | Keratin, type I cytoskeletal 28 OS=Homo sapiens GNHRK28 PE=1 SV=1           | LAADDFR                          | 2 | 0.8198 | 0.8178 | 11032 |    |        |        |        |        |        |
|             |                                                                             | VTMQLNDR                         | 2 | 0.7791 | 0.779  | 10012 |    |        |        |        |        |        |
|             |                                                                             | LAADDFR                          | 2 | 0.8198 | 0.8178 | 11032 |    |        |        |        |        |        |
|             |                                                                             | VTMQLNDR                         | 2 | 0.7791 | 0.779  | 10012 |    |        |        |        |        |        |
|             |                                                                             | ETMQLNDR                         | 1 | 0.8139 | 0.8139 |       | 1  | 0.8139 | 0.8139 | 0.8139 | 0.8139 |        |
| K1C9_HUMAN  | Keratin, type I cytoskeletal 9 OS=Homo sapiens GNHRK9 PE=1 SV=3             | DIENYETQTEIHFVSSGGVGSSAK         | 3 | 0.5846 | 0.5726 | 12857 | 17 | 0.7887 | 0.7233 | 0.6904 | 0.6642 |        |
|             |                                                                             | DIETHYALLGGQEFSSGSK              | 1 | 0.6626 | 0.6626 |       |    |        |        |        |        |        |
|             |                                                                             | FSSGGGGGGR                       | 1 | 0.7023 | 0.7023 |       |    |        |        |        |        |        |
|             |                                                                             | FGSSGGGGSSGR                     | 3 | 0.6528 | 0.6519 | 10897 |    |        |        |        |        |        |
|             |                                                                             | GGGSGSGSGSGSGSGSGSGSSASLGGGFGGGR | 2 | 1.0375 | 0.9871 | 15685 |    |        |        |        |        |        |
| K1H1_HUMAN  | Keratin, type I cuticular Ha1 OS=Homo sapiens GNHRK13 PE=1 SV=3             | QREPCNYSLLSK                     | 1 | 0.6477 | 0.6368 | 13135 |    |        |        |        |        |        |
|             |                                                                             | OVLDNLTKE                        | 1 | 0.5302 | 0.5302 |       |    |        |        |        |        |        |
|             |                                                                             | SGGGGGRLSLSGSSR                  | 1 | 0.6589 | 0.6589 |       |    |        |        |        |        |        |
|             |                                                                             | STMDLNSR                         | 4 | 0.5712 | 0.5687 | 1114  |    |        |        |        |        |        |
|             |                                                                             | TLLDNTR                          | 3 | 0.5842 | 0.5821 | 1114  |    |        |        |        |        |        |
| K1H2_HUMAN  | Keratin, type I cuticular Ha2 OS=Homo sapiens GNHRK13 PE=1 SV=2             | VQLEGNANLEAK                     | 2 | 0.8401 | 0.7981 | 1109  |    |        |        |        |        |        |
|             |                                                                             | ETMQLNDR                         | 1 | 0.8139 | 0.8139 |       | 4  | 1.185  | 1.112  | 1.0528 | 1.0242 |        |
|             |                                                                             | LAADDFR                          | 2 | 0.8198 | 0.8178 | 11032 | 2  | 0.8168 | 0.8178 | 0.8168 | 0.8178 |        |
|             |                                                                             | AOYEIAGR                         | 2 | 0.7457 | 0.7442 | 10935 | 14 | 1.1171 | 1.0674 | 0.7961 | 0.7547 |        |
|             |                                                                             | DYQELMNVK                        | 2 | 0.6241 | 0.6164 | 37695 |    |        |        |        |        |        |
| K22E_HUMAN  | Keratin, type II cytoskeletal 2 epidermal OS=Homo sapiens GNHRK21 PE=1 SV=2 | FASFDK                           | 1 | 0.7706 | 0.7706 |       |    |        |        |        |        |        |
|             |                                                                             | FASFDK                           | 1 | 0.7706 | 0.7706 |       |    |        |        |        |        |        |
|             |                                                                             | FASFDK                           | 1 | 0.7706 | 0.7706 |       |    |        |        |        |        |        |
|             |                                                                             | FASFDK                           | 1 | 0.7706 | 0.7706 |       |    |        |        |        |        |        |
|             |                                                                             | FASFDK                           | 1 | 0.7706 | 0.7706 |       |    |        |        |        |        |        |
| K22C_HUMAN  | Keratin, type II cytoskeletal 1 OS=Homo sapiens GNHRK1 PE=1 SV=6            | AESAELYGSK                       | 2 | 1.009  | 0.9706 | 14861 | 23 | 0.9224 | 1.1288 | 0.7738 | 0.8579 |        |
|             |                                                                             | AOYEDIAGK                        | 3 | 0.5785 | 0.5784 | 10281 |    |        |        |        |        |        |
|             |                                                                             | DYRQNKWK                         | 3 | 0.7132 | 0.6948 | 14451 |    |        |        |        |        |        |
|             |                                                                             | DYQELMNVK                        | 3 | 0.6289 | 0.6285 | 10434 |    |        |        |        |        |        |
|             |                                                                             | FLEQDQVLQTVWELLQVDVSTR           | 1 | 0.6889 | 0.6711 | 12738 |    |        |        |        |        |        |
| K2C3B_HUMAN | Keratin, type II cytoskeletal 3 OS=Homo sapiens GNHRK3 PE=1 SV=2            | FASFDK                           | 1 | 0.7706 | 0.7706 |       |    |        |        |        |        |        |
|             |                                                                             | FASFDK                           | 1 | 0.7706 | 0.7706 |       |    |        |        |        |        |        |
|             |                                                                             | FASFDK                           | 1 | 0.7706 | 0.7706 |       |    |        |        |        |        |        |
|             |                                                                             | FASFDK                           | 1 | 0.7706 | 0.7706 |       |    |        |        |        |        |        |
|             |                                                                             | FASFDK                           | 1 | 0.7706 | 0.7706 |       |    |        |        |        |        |        |
| K2C4_HUMAN  | Keratin, type II cytoskeletal 4 OS=Homo sapiens GNHRK4 PE=1 SV=4            | AOYEIAGR                         | 2 | 0.7457 | 0.7442 | 10935 | 4  | 0.6979 | 0.6994 | 0.6916 | 0.6623 |        |
|             |                                                                             | FASFDK                           | 1 | 0.7706 | 0.7706 |       |    |        |        |        |        |        |
|             |                                                                             | FASFDK                           | 1 | 0.7706 | 0.7706 |       |    |        |        |        |        |        |
|             |                                                                             | FASFDK                           | 1 | 0.7706 | 0.7706 |       |    |        |        |        |        |        |
|             |                                                                             | FASFDK                           | 1 | 0.7706 | 0.7706 |       |    |        |        |        |        |        |
| K2C5_HUMAN  | Keratin, type II cytoskeletal 5 OS=Homo sapiens GNHRK5 PE=1 SV=3            | AOYEIAGR                         | 1 | 0.7927 | 0.7927 |       | 6  | 2.2115 | 1.6515 | 1.2248 | 1.0987 |        |
|             |                                                                             | FASFDK                           | 1 | 0.7706 | 0.7706 |       |    |        |        |        |        |        |
|             |                                                                             | FASFDK                           | 1 | 0.7706 | 0.7706 |       |    |        |        |        |        |        |
|             |                                                                             | FASFDK                           | 1 | 0.7706 | 0.7706 |       |    |        |        |        |        |        |
|             |                                                                             | FASFDK                           | 1 | 0.7706 | 0.7706 |       |    |        |        |        |        |        |
| K2C6_HUMAN  | Keratin, type II cytoskeletal 6 OS=Homo sapiens GNHRK6 PE=1 SV=3            | AOYEIAGR                         | 1 | 0.7927 | 0.7927 |       | 6  | 2.2115 | 1.6515 | 1.2248 | 1.0987 |        |
|             |                                                                             | FASFDK                           | 1 | 0.7706 | 0.7706 |       |    |        |        |        |        |        |
|             |                                                                             | FASFDK                           | 1 | 0.7706 | 0.7706 |       |    |        |        |        |        |        |
|             |                                                                             | FASFDK                           | 1 | 0.7706 | 0.7706 |       |    |        |        |        |        |        |
|             |                                                                             | FASFDK                           | 1 | 0.7706 | 0.7706 |       |    |        |        |        |        |        |
| K2C8_HUMAN  | Keratin, type II cytoskeletal 8 OS=Homo sapiens GNHRK8 PE=1 SV=5            | AOYEIAGR                         | 1 | 0.7927 | 0.7927 |       | 5  | 0.8566 | 0.9023 | 0.8414 | 0.8827 |        |
|             |                                                                             | FASFDK                           | 1 | 0.7706 | 0.7706 |       |    |        |        |        |        |        |
|             |                                                                             | FASFDK                           | 1 | 0.7706 | 0.7706 |       |    |        |        |        |        |        |
|             |                                                                             | FASFDK                           | 1 | 0.7706 | 0.7706 |       |    |        |        |        |        |        |
|             |                                                                             | FASFDK                           | 1 | 0.7706 | 0.7706 |       |    |        |        |        |        |        |
| K2C9_HUMAN  | Keratin, type II cytoskeletal 9 OS=Homo sapiens GNHRK9 PE=1 SV=3            | AOYEIAGR                         | 1 | 0.7927 | 0.7927 |       | 6  | 0.9314 | 0.9422 | 0.9038 | 0.9176 |        |
|             |                                                                             | FASFDK                           | 1 | 0.7706 | 0.7706 |       |    |        |        |        |        |        |
|             |                                                                             | FASFDK                           | 1 | 0.7706 | 0.7706 |       |    |        |        |        |        |        |
|             |                                                                             | FASFDK                           | 1 | 0.7706 | 0.7706 |       |    |        |        |        |        |        |
|             |                                                                             | FASFDK                           | 1 | 0.7706 | 0.7706 |       |    |        |        |        |        |        |
| K2C7_HUMAN  | Keratin, type II cytoskeletal 7 OS=Homo sapiens GNHRK7 PE=1 SV=3            | FASFDK                           | 1 | 0.7706 | 0.7706 |       | 5  | 1.0757 | 1.0356 | 1.0378 | 0.9961 |        |
|             |                                                                             | FASFDK                           | 1 | 0.7706 | 0.7706 |       |    |        |        |        |        |        |
|             |                                                                             | FASFDK                           | 1 | 0.7706 | 0.7706 |       |    |        |        |        |        |        |
|             |                                                                             | FASFDK                           | 1 | 0.7706 | 0.7706 |       |    |        |        |        |        |        |
|             |                                                                             | FASFDK                           | 1 | 0.7706 | 0.7706 |       |    |        |        |        |        |        |
| K2C7I_HUMAN | Keratin, type II cytoskeletal 7I OS=Homo sapiens GNHRK7I PE=1 SV=2          | FLEQDQVLQTVWELLQVDVSTR           | 1 | 0.6889 | 0.6711 | 12738 |    |        |        |        |        |        |
|             |                                                                             | FASFDK                           | 1 | 0.7706 | 0.7706 |       | 1  | 0.8246 | 0.8246 | 0.8246 | 0.8246 |        |
|             |                                                                             | FASFDK                           | 1 | 0.7706 | 0.7706 |       | 3  | 0.6987 | 0.5998 | 0.6827 | 0.5847 |        |
|             |                                                                             | FASFDK                           | 1 | 0.7706 | 0.7706 |       |    |        |        |        |        |        |
|             |                                                                             | FASFDK                           | 1 | 0.7706 | 0.7706 |       |    |        |        |        |        |        |
| K2C7J_HUMAN | Keratin, type II cytoskeletal 7J OS=Homo sapiens GNHRK7J PE=1 SV=1          | FASFDK                           | 1 | 0.7706 | 0.7706 |       | 3  | 0.7135 | 0.6295 | 0.7024 | 0.6189 |        |
|             |                                                                             | FASFDK                           | 1 | 0.7706 | 0.7706 |       |    |        |        |        |        |        |
|             |                                                                             | FASFDK                           | 1 | 0.7706 | 0.7706 |       |    |        |        |        |        |        |
|             |                                                                             | FASFDK                           | 1 | 0.7706 | 0.7706 |       |    |        |        |        |        |        |
|             |                                                                             | FASFDK                           | 1 | 0.7706 | 0.7706 |       |    |        |        |        |        |        |
| K2C7K_HUMAN | Keratin, type II cytoskeletal 7K OS=Homo sapiens GNHRK7K PE=1 SV=2          | FASFDK                           | 1 | 0.7706 | 0.7706 |       | 4  | 0.8068 | 0.4637 | 1.5825 | 3      |        |
|             |                                                                             | FASFDK                           | 1 | 0.7706 | 0.7706 |       |    |        |        |        |        |        |
|             |                                                                             | FAS                              |   |        |        |       |    |        |        |        |        |        |











|             |                                                                                            |   |        |        |    |        |        |        |        |         |
|-------------|--------------------------------------------------------------------------------------------|---|--------|--------|----|--------|--------|--------|--------|---------|
| TGM2_HUMAN  | Protein glutamine gamma-glutamyltransferase 2 OS=Homo sapiens GN=TGM2 PE=1 SV=2            | 1 | 0.015  | 0.015  | 2  | 0.7253 | 0.7253 | 0.1467 | 0.1467 | 25.1603 |
| THO_HUMAN   | Thioredoxin OS=Homo sapiens GN=TXN PE=1 SV=3                                               | 1 | 1.4355 | 1.4355 | 1  | 1.4355 | 1.4355 | 1.4355 | 1.4355 | 1.4355  |
| THOM_HUMAN  | Thioredoxin, mitochondrial OS=Homo sapiens GN=TXN2 PE=1 SV=2                               | 1 | 1.5372 | 1.5372 | 1  | 1.5372 | 1.5372 | 1.5372 | 1.5372 | 1.5372  |
| TICN1_HUMAN | Testican-1 OS=Homo sapiens GN=SPOCK1 PE=1 SV=1                                             | 1 | 0.1509 | 0.1509 | 1  | 0.1509 | 0.1509 | 0.1509 | 0.1509 | 0.1509  |
| TICN3_HUMAN | Testican-3 OS=Homo sapiens GN=SPOCK3 PE=1 SV=2                                             | 1 | 0.2137 | 0.2137 | 2  | 0.1838 | 0.1738 | 0.1814 | 0.1717 | 0.1461  |
| TIMP1_HUMAN | Metalloproteinase inhibitor 1 OS=Homo sapiens GN=TIMP1 PE=1 SV=1                           | 1 | 0.1939 | 0.1939 | 2  | 2.7831 | 2.7831 | 2.7831 | 2.7831 | 3.0384  |
| TIMP2_HUMAN | Metalloproteinase inhibitor 2 OS=Homo sapiens GN=TIMP2 PE=1 SV=2                           | 1 | 0.4504 | 0.4504 | 5  | 0.4237 | 0.4179 | 0.4201 | 0.4144 | 0.4109  |
| TKT_HUMAN   | Transketolase OS=Homo sapiens GN=TKT PE=1 SV=3                                             | 1 | 0.8033 | 0.8033 | 7  | 2.8418 | 2.6039 | 1.8918 | 1.825  | 1.6102  |
| TLN1_HUMAN  | Talin-1 OS=Homo sapiens GN=TLN1 PE=1 SV=3                                                  | 1 | 0.7226 | 0.7226 | 10 | 2.0717 | 1.8854 | 1.2597 | 1.1088 | 1.0789  |
| TLN2_HUMAN  | Talin-2 OS=Homo sapiens GN=TLN2 PE=1 SV=4                                                  | 1 | 0.8033 | 0.8033 | 2  | 0.6591 | 0.48   | 0.5516 | 0.4399 | 0.4388  |
| TDOS_HUMAN  | Tumor necrosis factor receptor-associated protein 3 OS=Homo sapiens GN=TRAF3 PE=1 SV=2     | 1 | 0.8492 | 0.8492 | 1  | 0.862  | 0.862  | 0.862  | 0.862  | 0.862   |
| TPS1_HUMAN  | Triosephosphate isomerase OS=Homo sapiens GN=TPS1 PE=1 SV=2                                | 1 | 1.5111 | 1.5111 | 10 | 1.3466 | 1.3346 | 1.2175 | 1.2129 | 1.1316  |
| TPIS1_HUMAN | Putative triosephosphate isomerase-like protein LOC286018 OS=Homo sapiens PE=1 SV=2        | 1 | 1.5111 | 1.5111 | 2  | 1.1721 | 1.1721 | 1.1219 | 1.1219 | 1.1219  |
| TPM1_HUMAN  | Topomycin alpha-1 chain OS=Homo sapiens GN=TPM1 PE=1 SV=2                                  | 1 | 0.833  | 0.833  | 3  | 1.2341 | 1.1659 | 1.1259 | 1.0823 | 1.0719  |
| TPM2_HUMAN  | Topomycin beta chain OS=Homo sapiens GN=TPM2 PE=1 SV=1                                     | 1 | 0.7433 | 0.7433 | 3  | 1.2316 | 1.2316 | 1.123  | 1.123  | 1.123   |
| TPM3_HUMAN  | Topomycin alpha-3 chain OS=Homo sapiens GN=TPM3 PE=1 SV=1                                  | 1 | 0.7433 | 0.7433 | 3  | 1.2341 | 1.1659 | 1.1259 | 1.0823 | 1.0719  |
| TPM4_HUMAN  | Topomycin alpha-4 chain OS=Homo sapiens GN=TPM4 PE=1 SV=3                                  | 1 | 0.7433 | 0.7433 | 8  | 2.8867 | 3.7565 | 0.9665 | 1.2823 | 0.9988  |
| TPST1_HUMAN | TPT1-like protein OS=Homo sapiens PE=1 SV=1                                                | 1 | 0.853  | 0.853  | 1  | 0.853  | 0.853  | 0.853  | 0.853  | 0.853   |
| TRIS_HUMAN  | Thyroid hormone receptor-associated protein 3 OS=Homo sapiens GN=TRAP3 PE=1 SV=2           | 1 | 0.853  | 0.853  | 1  | 0.853  | 0.853  | 0.853  | 0.853  | 0.853   |
| TRFE_HUMAN  | Trifluoromethyl-L-alanine aminotransferase OS=Homo sapiens GN=TRFE PE=1 SV=2               | 1 | 0.667  | 0.667  | 1  | 0.667  | 0.667  | 0.667  | 0.667  | 0.667   |
| TRFL_HUMAN  | Lactoferrin OS=Homo sapiens GN=TRFL PE=1 SV=6                                              | 1 | 0.7424 | 0.7424 | 1  | 0.7424 | 0.7424 | 0.7424 | 0.7424 | 0.7424  |
| TRX1_HUMAN  | Thioredoxin reductase 1, cytoplasmic OS=Homo sapiens GN=TRX1 PE=1 SV=3                     | 1 | 1.1467 | 1.1467 | 1  | 1.1467 | 1.1467 | 1.1467 | 1.1467 | 1.1467  |
| TRX2_HUMAN  | Thioredoxin reductase 2, cytoplasmic OS=Homo sapiens GN=TRX2 PE=1 SV=3                     | 1 | 1.1467 | 1.1467 | 1  | 1.1467 | 1.1467 | 1.1467 | 1.1467 | 1.1467  |
| TSPL1_HUMAN | Thrombospondin-1 OS=Homo sapiens GN=THBS1 PE=1 SV=2                                        | 1 | 2.0113 | 1.8343 | 24 | 1.4387 | 1.2978 | 1.1672 | 1.1156 | 1.0923  |
| TXN2_HUMAN  | Thioredoxin domain-containing protein 5 OS=Homo sapiens GN=TXN2 PE=1 SV=2                  | 1 | 1.0119 | 1.0119 | 3  | 2.1168 | 2.2274 | 1.78   | 1.8639 | 1.8463  |
| TXN1_HUMAN  | Thioredoxin-like protein 1 OS=Homo sapiens GN=TXN1 PE=1 SV=3                               | 1 | 0.7213 | 0.7213 | 1  | 0.7213 | 0.7213 | 0.7213 | 0.7213 | 0.7213  |
| UZAF2_HUMAN | Splicing factor UZAF 65 kDa subunit OS=Homo sapiens GN=UZAF2 PE=1 SV=4                     | 1 | 0.1502 | 0.1502 | 2  | 0.4621 | 0.4621 | 0.3409 | 0.3409 | 0.3409  |
| UAP6_HUMAN  | Spliceosome RNA helicase BAT1 OS=Homo sapiens GN=BAT1 PE=1 SV=1                            | 1 | 0.8201 | 0.8201 | 1  | 0.8201 | 0.8201 | 0.8201 | 0.8201 | 0.8201  |
| UBQL3_HUMAN | Ubiquitin-conjugating enzyme E2 L3 OS=Homo sapiens GN=UBE2L3 PE=1 SV=1                     | 1 | 0.8201 | 0.8201 | 2  | 2.7069 | 2.7069 | 2.0087 | 2.0087 | 2.0087  |
| UBC9_HUMAN  | SUMO-conjugating enzyme UBC9 OS=Homo sapiens GN=UBE2E1 PE=1 SV=1                           | 1 | 1.2092 | 1.2092 | 2  | 0.7345 | 0.7345 | 0.5605 | 0.5605 | 0.5605  |
| UBE2N_HUMAN | Ubiquitin-conjugating enzyme E2 N OS=Homo sapiens GN=UBE2N PE=1 SV=1                       | 1 | 0.9167 | 0.9167 | 1  | 0.9167 | 0.9167 | 0.9167 | 0.9167 | 0.9167  |
| UCHL1_HUMAN | Ubiquitin carboxyl-terminal hydrolase isozyme L1 OS=Homo sapiens GN=UCHL1 PE=1 SV=2        | 1 | 0.679  | 0.679  | 5  | 0.0664 | 0.0664 | 0.0047 | 0.0047 | 0.0047  |
| UGPA_HUMAN  | UTP-glucose-1-phosphate uridylyltransferase OS=Homo sapiens GN=UGP2 PE=1 SV=5              | 1 | 1.2399 | 1.2399 | 2  | 0.9273 | 0.9273 | 0.873  | 0.873  | 0.873   |
| ULK4_HUMAN  | Serine/threonine-protein kinase ULK4 OS=Homo sapiens GN=ULK4 PE=2 SV=2                     | 1 | 2.3741 | 2.3741 | 1  | 2.3741 | 2.3741 | 2.3741 | 2.3741 | 2.3741  |
| UVRAG_HUMAN | Ultraviolet radiation endonuclease OS=Homo sapiens GN=UVRAG PE=1 SV=1                      | 1 | 0.0752 | 0.0752 | 1  | 0.0752 | 0.0752 | 0.0752 | 0.0752 | 0.0752  |
| VSM_HUMAN   | Vimentin OS=Homo sapiens GN=VIM PE=1 SV=4                                                  | 1 | 1.1219 | 1.1219 | 23 | 1.2813 | 1.3635 | 1.2355 | 1.3195 | 1.2623  |
| VIMC_HUMAN  | Vimentin OS=Homo sapiens GN=VIM PE=1 SV=4                                                  | 1 | 1.1219 | 1.1219 | 23 | 1.2813 | 1.3635 | 1.2355 | 1.3195 | 1.2623  |
| VINC_HUMAN  | Vinculin OS=Homo sapiens GN=VCL PE=1 SV=4                                                  | 1 | 1.0533 | 1.0533 | 5  | 1.043  | 1.043  | 0.9916 | 0.9916 | 0.9916  |
| VTA1_HUMAN  | Vacuolar protein sorting-associated protein VTA1 homolog OS=Homo sapiens GN=VTA1 PE=1 SV=1 | 1 | 0.674  | 0.674  | 1  | 0.674  | 0.674  | 0.674  | 0.674  | 0.674   |
| VWF_HUMAN   | von Willebrand factor OS=Homo sapiens GN=VWF PE=1 SV=2                                     | 1 | 0.915  | 0.915  | 7  | 2.3569 | 2.3569 | 1.574  | 1.574  | 2.479   |
| WDR1_HUMAN  | WD repeat-containing protein 1 OS=Homo sapiens GN=WDR1 PE=1 SV=4                           | 1 | 2.0936 | 2.0936 | 5  | 0.9933 | 0.977  | 0.8674 | 0.872  | 0.8661  |
| YBX1_HUMAN  | Nucleic-acid-sensitive element-binding protein 1 OS=Homo sapiens GN=YBX1 PE=1 SV=3         | 1 | 0.6601 | 0.6601 | 1  | 0.6601 | 0.6601 | 0.6601 | 0.6601 | 0.6601  |

HUVEC:HA Fibroblasts

| Accession    | Description                                                                                                       | Sequence                                                                                                                                                                                                                                           | # Indiv                                                  | Pep SM                                                                                                                                                | Pep ratio                                                                                                                                             | Pep GM           | Pep ratio | # pep            | Prot SM          | Prot GM          | Prot ratio | Prot GM | Prot ratio | Prot GM | Protein |
|--------------|-------------------------------------------------------------------------------------------------------------------|----------------------------------------------------------------------------------------------------------------------------------------------------------------------------------------------------------------------------------------------------|----------------------------------------------------------|-------------------------------------------------------------------------------------------------------------------------------------------------------|-------------------------------------------------------------------------------------------------------------------------------------------------------|------------------|-----------|------------------|------------------|------------------|------------|---------|------------|---------|---------|
|              |                                                                                                                   |                                                                                                                                                                                                                                                    | neous                                                    | ratio                                                                                                                                                 | ratio                                                                                                                                                 | ratio            | ratio     | sectores         | SM               | GM               | SM         | GM      | SM         | GM      | SM      |
|              |                                                                                                                   |                                                                                                                                                                                                                                                    |                                                          |                                                                                                                                                       |                                                                                                                                                       |                  |           |                  |                  |                  |            |         |            |         | SM      |
| 1433E_HUMAN  | 14-3-3 protein beta/alpha OS=Homo sapiens GN=YWHAB PE#1 SV#3                                                      | DSTLMQLLR<br>IEALQEDGNLLELLIK<br>NLLSVVYK<br>QTTVNSQQAQYQAEFISK<br>TAFDEAIEDLTNEESYK<br>YQDMAAMAK<br>YLVEASGEK                                                                                                                                     | 2<br>1<br>1<br>2<br>1<br>2<br>1                          | 10.8265<br>7.4579<br>38.7517<br>2.9807<br>1.4367<br>0.7046<br>5.9044                                                                                  | 1.8463<br>7.4579<br>38.7517<br>2.9807<br>1.4367<br>0.9471<br>5.9044                                                                                   | 32.1785          | 7         | 13.3845          | 10.3759          | 9.8133           | 7.8691     | 4.2515  | 2.3282     |         |         |
| 1433E_HUMAN  | 14-3-3 protein epsilon OS=Homo sapiens GN=YWHAE PE#1 SV#1                                                         | AAPFQDAIEDLTSEESYK<br>DSTLMQLLR<br>EAENSLVYVYK<br>HLRRAAFGEISK<br>LCCDLDLVDLK<br>NLLSVVYK<br>QMVTELEK                                                                                                                                              | 2<br>2<br>2<br>2<br>2<br>2<br>2                          | 10.8265<br>10.8265<br>8.3089<br>17.7078<br>10.8237<br>38.7517<br>3.31                                                                                 | 1.8463<br>1.8463<br>6.8848<br>7.7078<br>10.7287<br>38.7517<br>0.935                                                                                   | 32.1785          | 7         | 13.3845          | 9.5558           | 6.183            | 6.2151     | 4.1662  | 2.9809     |         |         |
| 1433E_HUMAN  | 14-3-3 protein gamma OS=Homo sapiens GN=YWHAG PE#1 SV#2                                                           | DSTLMQLLR<br>TAFDEAIEDLTNEESYK<br>YQDMAAMAK<br>YLVEASGEK                                                                                                                                                                                           | 2<br>3<br>2                                              | 10.8265<br>0.7701<br>0.7848<br>4.0205                                                                                                                 | 1.8463<br>0.6949<br>0.6471<br>3.9757                                                                                                                  | 32.1785          | 4         | 6.7861           | 4.1776           | 2.6886           | 1.7734     | 1.6213  | 4.8933     |         |         |
| 1433E_HUMAN  | 14-3-3 protein sigma OS=Homo sapiens GN=SNFV PE#1 SV#1                                                            | DSTLMQLLR<br>NLLSVVYK<br>QTTNSQQAQYQAEFISK<br>SICITVLELLDK<br>TAFDEAIEDLTNEESYK<br>YQDMAAMAK<br>YLVEASGEK                                                                                                                                          | 2<br>1<br>1<br>2<br>2<br>1<br>1                          | 10.8265<br>38.7517<br>5.325<br>8.6972<br>3.5957<br>13.0748<br>4.2738                                                                                  | 1.8463<br>38.7517<br>5.325<br>8.6972<br>3.5957<br>13.0748<br>4.2738                                                                                   | 32.1785          | 7         | 12.8844          | 10.747           | 8.7114           | 8.1259     | 5.0589  | 2.282      |         |         |
| 1433Z_HUMAN  | 14-3-3 protein zeta/delta OS=Homo sapiens GN=YWHAZ PE#1 SV#1                                                      | DNDNDVSLLEK<br>DSTLMQLLR<br>EKTEELR<br>FLRNAGDGEISK<br>GIWDSQQYQAEFISK<br>NLLSVVYK<br>TAFDEAIEDLTSEESYK<br>YVSSIEQK<br>YQDMAAMAK<br>YLVEASGEK                                                                                                      | 5<br>2<br>1<br>1<br>1<br>1<br>2<br>2<br>1<br>1           | 15.1834<br>10.8265<br>1.9004<br>6.072<br>10.6094<br>38.7517<br>6.4604<br>8.1877<br>5.0876<br>0.3471                                                   | 15.5307<br>1.8463<br>1.9004<br>6.072<br>10.2378<br>38.7517<br>5.7494<br>6.1458<br>4.8162<br>0.3471                                                    | 11911<br>32.1785 | 10        | 10.0539          | 9.9303           | 5.4958           | 7.2544     | 5.9688  | 3.9142     |         |         |
| 2AAB_HUMAN   | Semaphore protein phosphatase 2A (85 kDa regulatory subunit A) alpha isoform OS=Homo sapiens GN=PPP2R1A PE#1 SV#4 | QLSSQLLIVLEAEDIK                                                                                                                                                                                                                                   | 2                                                        | 4.7258                                                                                                                                                | 4.8178                                                                                                                                                | 13989            | 1         | 4.7258           | 4.7258           | 4.7258           | 4.7258     | 4.7258  | 4.8178     | 4.8178  |         |
| 2AB6_HUMAN   | Semaphore protein phosphatase 2A (85 kDa regulatory subunit A) beta isoform OS=Homo sapiens GN=PPP2R1B PE#1 SV#2  | WELLDNLDDFFK                                                                                                                                                                                                                                       | 2                                                        | 4.7258                                                                                                                                                | 4.8178                                                                                                                                                | 13989            | 1         | 4.7258           | 4.7258           | 4.7258           | 4.7258     | 4.7258  | 4.8178     | 4.8178  |         |
| 6PGD_HUMAN   | 6-phosphogluconate dehydrogenase, decarboxylating OS=Homo sapiens GN=PGD PE#1 SV#3                                | AGGAVDDFEK<br>VGTGEPDQVSGYSSGEVYK                                                                                                                                                                                                                  | 1<br>1                                                   | 5.2535                                                                                                                                                | 5.2535                                                                                                                                                |                  | 3         | 4.2007           | 4.9007           | 2.3389           | 3.0794     | 3.0686  | 5.4048     | 5.4048  |         |
| AATM_HUMAN   | Aspartate aminotransferase, mitochondrial OS=Homo sapiens GN=GGT2 PE#1 SV#2                                       | ASAAELGENSEVLK<br>EFSFRTIK<br>NLDKEYLPGLAFFCK<br>GGPFFVGAQVDSK                                                                                                                                                                                     | 1<br>1<br>2<br>2                                         | 3.0215<br>0.454<br>2.7024<br>3.06                                                                                                                     | 3.0215<br>0.454<br>2.4254<br>3.0437                                                                                                                   | 15271            | 4         | 2.3095           | 2.5              | 1.8352           | 2.1316     | 2.0525  | 2.5418     |         |         |
| ACBP_HUMAN   | Acyl-CoA-binding protein OS=Homo sapiens GN=ACBP PE#1 SV#2                                                        | QATYGKINTEPQALDTQK                                                                                                                                                                                                                                 | 1                                                        | 2.5013                                                                                                                                                | 2.5013                                                                                                                                                |                  | 1         | 2.5013           | 2.5013           | 2.5013           | 2.5013     | 2.5013  | 2.5013     | 2.5013  |         |
| ACOC_HUMAN   | Cytoplasmic aconitate hydratase OS=Homo sapiens GN=ACAT PE#1 SV#3                                                 | YQAGLPLVLIK                                                                                                                                                                                                                                        | 1                                                        | 8.0023                                                                                                                                                | 8.0023                                                                                                                                                |                  | 1         | 8.0023           | 8.0023           | 8.0023           | 8.0023     | 8.0023  | 8.0023     | 8.0023  |         |
| ACTA_HUMAN   | Actin, arctic smooth muscle OS=Homo sapiens GN=ACTA PE#1 SV#1                                                     | AGAGQADRR<br>DLDTVLYMK<br>DSYVGGESGSK<br>ETALAPSTMK<br>GILTK<br>LCYVALDFEENMATASSSSLEK                                                                                                                                                             | 2<br>2<br>2<br>3<br>3<br>5                               | 13.0828<br>11.8814<br>13.6029<br>7.8295<br>12.9222<br>5.1523                                                                                          | 13.0767<br>11.2914<br>13.2836<br>6.8485<br>12.6262<br>4.8875                                                                                          | 10435            | 6         | 10.7085          | 10.6121          | 10.1153          | 10.1138    | 9.5525  | 1.4828     |         |         |
| ACTB_HUMAN   | Actin, cytoplasmic 1 OS=Homo sapiens GN=ACTB PE#1 SV#1                                                            | AGAGQADRR<br>AVFPSVGRPR<br>DLDTVLYMK<br>DSYVGGESGSK<br>ETALAPSTMK<br>GILTK<br>GYSFTTIAER<br>HGGVMVGMQSK<br>IAPPERK<br>LCYVALDFEENMATASSSSLEK<br>YAPFEPHLLTEARLNK                                                                                   | 5<br>2<br>5<br>2<br>3<br>4<br>4<br>1<br>1<br>2<br>5      | 13.8928<br>8.3862<br>11.5915<br>13.6029<br>9.5721<br>14.6377<br>10.9043<br>1.0523<br>5.1687<br>5.9482<br>5.9046                                       | 13.843<br>6.7981<br>11.1061<br>13.2836<br>8.0612<br>14.2916<br>10.7225<br>0.0523<br>5.1687<br>5.9259<br>4.2011                                        | 11986<br>25891   | 12        | 8.8485           | 9.9449           | 5.8887           | 8.4072     | 7.658   | 4.626      |         |         |
| ACTBL_HUMAN  | Beta-actin-like protein 2 OS=Homo sapiens GN=ACTL2 PE#1 SV#2                                                      | DLDTVLYMK<br>HGGVMVGMQSK<br>IAPPERK<br>VAPFEPHLLTEARLNK                                                                                                                                                                                            | 5<br>1<br>1<br>1                                         | 11.5915<br>5.1687<br>5.1687<br>8.1319                                                                                                                 | 11.061<br>5.0523<br>5.1687<br>8.2011                                                                                                                  | 13912            | 4         | 6.2361           | 8.6269           | 2.2467           | 5.3744     | 5.2228  | 12.535     |         |         |
| ACTBM_HUMAN  | Beta-actin-like protein 3 OS=Homo sapiens GN=ACTL3 PE#1 SV#1                                                      | DEYDESSPVSIR                                                                                                                                                                                                                                       | 2                                                        | 6.5412                                                                                                                                                | 6.5412                                                                                                                                                |                  | 1         | 6.5412           | 6.5412           | 6.5412           | 6.5412     | 6.5412  | 6.5412     | 6.5412  |         |
| ACTC_HUMAN   | Actin, alpha cardiac muscle 1 OS=Homo sapiens GN=ACTC PE#1 SV#1                                                   | AGAGQADRR<br>AVFPSVGRPR<br>DLDTVLYMK<br>ETALAPSTMK<br>GILTK<br>HGGVMVGMQSK<br>IAPPERK<br>LCYVALDFEENMATASSSSLEK                                                                                                                                    | 2<br>2<br>5<br>3<br>3<br>1<br>1<br>2                     | 15.5131<br>8.3862<br>10.432<br>17.4225<br>18.2835<br>1.0523<br>5.1687<br>5.8826                                                                       | 15.5131<br>6.7981<br>10.432<br>17.4225<br>18.2836<br>0.0523<br>5.1687<br>5.8826                                                                       | 13448            | 8         | 8.8654           | 10.8962          | 5.2647           | 6.7426     | 6.4866  | 6.8279     |         |         |
| ACTG_HUMAN   | Actin, cytoplasmic 2 OS=Homo sapiens GN=ACTG PE#1 SV#1                                                            | AGAGQADRR<br>AVFPSVGRPR<br>DLDTVLYMK<br>DSYVGGESGSK<br>ETALAPSTMK<br>GILTK<br>GYSFTTIAER<br>HGGVMVGMQSK<br>IAPPERK<br>LCYVALDFEENMATASSSSLEK<br>YAPFEPHLLTEARLNK                                                                                   | 3<br>2<br>5<br>2<br>3<br>4<br>4<br>1<br>1<br>2<br>5      | 13.8928<br>8.3862<br>11.5915<br>13.6029<br>9.5721<br>14.6377<br>10.9043<br>1.0523<br>5.1687<br>5.9482<br>5.9046                                       | 13.843<br>6.7981<br>11.1061<br>13.2836<br>8.0612<br>14.2916<br>10.7225<br>0.0523<br>5.1687<br>5.9259<br>4.2011                                        | 11986<br>25891   | 12        | 8.8485           | 9.9449           | 5.8887           | 8.4072     | 7.658   | 4.626      |         |         |
| ACTH_HUMAN   | Actin, gamma-enteric smooth muscle OS=Homo sapiens GN=ACTG2 PE#1 SV#1                                             | AGAGQADRR<br>DLDTVLYMK<br>ETALAPSTMK<br>GILTK<br>LCYVALDFEENMATASSSSLEK                                                                                                                                                                            | 1<br>1<br>1<br>1<br>2                                    | 12.6882<br>11.8814<br>7.2926<br>15.0881<br>5.1523                                                                                                     | 12.6882<br>9.921<br>7.2926<br>15.0981<br>4.8975                                                                                                       | 16892            | 5         | 9.4329           | 8.1794           | 8.702            | 7.9741     | 7.8351  | 1.5655     |         |         |
| ACTN1_HUMAN  | Alpha-actinin-1 OS=Homo sapiens GN=ACTN1 PE#1 SV#2                                                                | AIMTYSSPVSIR<br>ASHEAVTDGK<br>CQLEENFTQTK<br>DILLPAWEK<br>FAGDSVEETSAK<br>GYEWEELNEIR<br>KDWINDLGLALTK<br>DQLEGGHLDGALPQNK<br>VDTYHNNAKQNPVITPQINSGK<br>LALGDIHNEVYK<br>LLETDIQVLEYMK<br>KDKVETLSEK<br>TINEVDNLTIK<br>VGVGEQLLTIAK<br>VGVGEQLLTIAK | 2<br>1<br>1<br>3<br>3<br>1<br>1<br>1<br>1<br>1<br>1<br>2 | 5.2805<br>6.1789<br>7.4101<br>10.4895<br>6.8055<br>11.0595<br>4.2197<br>4.1789<br>2.5997<br>6.8536<br>9.6091<br>2.4794<br>5.1687<br>10.6569<br>6.0568 | 5.7287<br>6.1789<br>7.4101<br>10.4555<br>6.5606<br>11.0595<br>4.1185<br>4.1789<br>2.5997<br>6.8536<br>9.5695<br>2.2548<br>5.1687<br>10.6569<br>5.5428 | 34932            | 15        | 6.5878           | 6.6938           | 5.994            | 6.1037     | 5.8178  | 1.5974     |         |         |
| ACTN2_HUMAN  | Alpha-actinin-2 OS=Homo sapiens GN=ACTN2 PE#1 SV#1                                                                | CQLEENFTQTK<br>DILLPAWEK<br>FAGDSVEETSAK<br>GYEWEELNEIR<br>LEGAFKGVWELNEIR<br>CQLEENFTQTK                                                                                                                                                          | 1<br>1<br>3<br>1<br>1<br>1                               | 7.4101<br>10.4895<br>6.8055<br>11.0595<br>0.1791<br>7.4101                                                                                            | 7.4101<br>10.4555<br>6.5606<br>11.0595<br>0.1791                                                                                                      | 11042            | 5         | 7.1487           | 7.7704           | 3.9945           | 5.5358     | 5.5173  | 7.5719     |         |         |
| ACTN3_HUMAN  | Alpha-actinin-3 OS=Homo sapiens GN=ACTN3 PE#1 SV#2                                                                | DILLPAWEK<br>FAGDSVEETSAK<br>GYEWEELNEIR<br>CQLEENFTQTK                                                                                                                                                                                            | 3<br>3<br>1<br>1                                         | 10.4895<br>6.8055<br>11.0595<br>7.4101                                                                                                                | 10.4555<br>6.5606<br>11.0595                                                                                                                          | 11042            | 3         | 8.1684           | 8.385            | 8.0075           | 8.1868     | 8.1536  | 1.2723     |         |         |
| ACTN4_HUMAN  | Alpha-actinin-4 OS=Homo sapiens GN=ACTN4 PE#1 SV#2                                                                | AIMTYSSPVSIR<br>ASHEAVTDGK<br>CQLEENFTQTK<br>DILLPAWEK<br>EALAHV<br>ETDTTADQAVASFK<br>FAGDSVEETSAK<br>GYEWEELNEIR<br>ISEMNTLEDELHLK<br>KIDPYNNAHVEIEK<br>LSSSNPVTVIPIQINSGK<br>QFASANNVPIQITK<br>TINEVDNLTIK<br>VGVGEQLLTIAK                       | 2<br>1<br>1<br>3<br>2<br>3<br>3<br>1<br>1<br>1<br>1<br>1 | 5.2805<br>6.1789<br>7.4101<br>10.4895<br>2.8206<br>4.4245<br>6.8055<br>11.0595<br>0.9425<br>3.8112<br>3.5952<br>2.3418<br>5.1687<br>10.6569           | 5.7287<br>6.1789<br>7.4101<br>10.4555<br>3.8719<br>4.4245<br>6.5606<br>11.0595<br>0.9425<br>3.8112<br>3.5952<br>2.3418<br>5.1687<br>10.6569           | 34932            | 14        | 8.8621           | 6.222            | 4.946            | 5.3346     | 4.9752  | 1.9659     |         |         |
| ACTS_HUMAN   | Actin, alpha skeletal muscle OS=Homo sapiens GN=ACTA1 PE#1 SV#1                                                   | AGAGQADRR<br>AVFPSVGRPR<br>DLDTVLYMK<br>DSYVGGESGSK<br>ETALAPSTMK<br>GILTK<br>HGGVMVGMQSK<br>IAPPERK<br>LCYVALDFEENMATASSSSLEK                                                                                                                     | 3<br>2<br>5<br>2<br>3<br>4<br>1<br>1<br>2                | 13.8928<br>8.3862<br>11.5915<br>13.6029<br>9.5721<br>14.6377<br>1.0523<br>5.1687<br>5.9482                                                            | 13.843<br>6.7981<br>11.1061<br>13.2836<br>8.0612<br>14.2916<br>0.0523<br>5.1687<br>5.9259                                                             | 11986<br>25891   | 9         | 8.135            | 10.5885          | 5.3678           | 6.5812     | 6.0362  | 5.9302     |         |         |
| ADAM9_HUMAN  | Disintegrin and metalloprotease domain-containing protein 9 OS=Homo sapiens GN=ADAM9 PE#1 SV#1                    | DLLDFEYVYVYK<br>QVYVQAGEK                                                                                                                                                                                                                          | 1                                                        | 0.5116                                                                                                                                                | 0.5116                                                                                                                                                |                  | 2         | 0.3736           | 0.3736           | 0.3472           | 0.3472     | 0.3472  | 0.3472     | 1.7003  |         |
| ADK_HUMAN    | Adenosine kinase OS=Homo sapiens GN=ADK PE#1 SV#2                                                                 | ELFEVEK                                                                                                                                                                                                                                            | 1                                                        | 0.5023                                                                                                                                                | 0.5023                                                                                                                                                |                  | 1         | 0.5023           | 0.5023           | 0.5023           | 0.5023     | 0.5023  | 0.5023     | 0.5023  |         |
| AEBP1_HUMAN  | Adipocyte enhancer-binding protein 1 OS=Homo sapiens GN=AEBP1 PE#1 SV#1                                           | GEDEVESEAKEPDVAIFR<br>VLSDFEVELEK                                                                                                                                                                                                                  | 1<br>1                                                   | 0.4689<br>0.8254                                                                                                                                      | 0.4689<br>0.8254                                                                                                                                      |                  | 1         | 0.4689<br>0.8254 | 0.4689<br>0.8254 | 0.4635<br>0.8254 | 0.4635     | 0.8254  | 1.1939     |         |         |
| AGRN_HUMAN   | Aggrin OS=Homo sapiens GN=AGRN PE#1 SV#4                                                                          | SIESTLQDEK<br>ADDVSGPK<br>AEGPEVDNLIK<br>AGPEVDNLIK<br>ISMPDVLKIK<br>VDNAPVDVVDGPNHLK<br>VDVSAPDVAHQEPDNLK                                                                                                                                         | 1<br>1<br>1<br>1<br>1<br>1<br>1                          | 0.855<br>0.1183<br>2.3504<br>1.8622<br>1.8037<br>1.9542<br>1.3185                                                                                     | 0.855<br>0.1183<br>2.3504<br>1.8622<br>1.8037<br>1.9542<br>1.3185                                                                                     |                  | 1         | 0.855            | 0.855            | 0.855            | 0.855      | 0.855   | 0.855      |         |         |
| AIBP_HUMAN   | Apoptogenin A1-binding protein OS=Homo sapiens GN=APDAIBP PE#1 SV#2                                               | GNAGGQDPLLILAKIK                                                                                                                                                                                                                                   | 1                                                        | 6.4323                                                                                                                                                | 6.4323                                                                                                                                                |                  | 1         | 6.4323           | 6.4323           | 6.4323           | 6.4323     | 6.4323  | 6.4323     | 6.4323  |         |
| AIBP1_HUMAN  | Aminocyclitol RNA synthetase complex-interacting multifunctional protein 1 OS=Homo sapiens GN=AIBP1 PE#1 SV#2     | GALADADCEIK<br>EYQGLNLIK<br>ETDGLNIK<br>VWFDFTFSEEMK                                                                                                                                                                                               | 1<br>4<br>2<br>2                                         | 1.0056<br>12.6181<br>6.8854<br>6.8854                                                                                                                 | 1.0056<br>12.6181<br>6.8854<br>6.8854                                                                                                                 |                  | 1         | 2.1055           | 2.1055           | 2.1055           | 2.1055     | 2.1055  | 2.1055     |         |         |
| AIX_HUMAN    | Alpha-intensin OS=Homo sapiens GN=AIX PE#1 SV#2                                                                   | ETDGLNIK                                                                                                                                                                                                                                           | 4                                                        | 12.6181                                                                                                                                               | 12.6181                                                                                                                                               |                  | 1         | 12.6181          | 12.6181          | 12.6181          | 12.6181    | 12.6181 | 12.6181    | 12.6181 |         |
| AKT1A1_HUMAN | Alcohol dehydrogenase (NADP+) OS=Homo sapiens GN=AKT1A1 PE#1 SV#3                                                 | VFLPFEVTEEK                                                                                                                                                                                                                                        | 2                                                        | 6.8854                                                                                                                                                | 6.8854                                                                                                                                                |                  | 1         | 6.8854           | 6.8854           | 6.8854           | 6.8854     | 6.8854  | 6.8854     | 6.8854  |         |
| AKA2_HUMAN   | A kinase anchor protein 12 OS=Homo sapiens GN=AKAP12 PE#1 SV#3                                                    | VELPSEQQGSQQGSQQGSQQGSAALVTEYDEK                                                                                                                                                                                                                   | 1                                                        | 7.5513                                                                                                                                                | 7.5513                                                                                                                                                |                  | 1         | 7.5513           | 7.5513           | 7.5513           | 7.5513     | 7.5513  | 7.5513     | 7.5513  |         |
| AL1A1_HUMAN  | Retinal dehydrogenase 1 OS=Homo sapiens GN=ALDH1A1 PE#1 SV#2                                                      | EAGFPVVNPNVPGYQPTAAGSSMDIHK<br>IFNNEHDVSYSK                                                                                                                                                                                                        | 1<br>1                                                   | 0.9228<br>0.6042                                                                                                                                      | 0.9228<br>0.6042                                                                                                                                      |                  | 6         | 5.5518           | 6.224            | 2.3126           | 2.861      | 2.8015  | 5.5333     |         |         |

|              |                                                                                                  |                             |   |          |          |        |   |         |         |        |        |               |               |
|--------------|--------------------------------------------------------------------------------------------------|-----------------------------|---|----------|----------|--------|---|---------|---------|--------|--------|---------------|---------------|
|              |                                                                                                  | LYSNAYLNDLAGGK              | 2 | 10.2573  | 9.5292   | 1.7322 |   |         |         |        |        |               |               |
|              |                                                                                                  | SLELDIV                     | 1 | 9.2423   | 9.2423   |        |   |         |         |        |        |               |               |
|              |                                                                                                  | VFQSTVEVQK                  | 1 | 9.2403   | 9.2403   |        |   |         |         |        |        |               |               |
|              |                                                                                                  | YLGNLPVTVTGGDQVYQK          | 1 | 12.244   | 12.244   |        |   |         |         |        |        |               |               |
| ALBU_HUMAN   | Serum albumin OS/Homo sapiens GN=ALBU PE=1 SV=2                                                  | KRQVSTVTVSRVLR              | 3 | 0.7786   | 0.7788   | 1.0595 | 2 | 0.7169  | 0.7079  | 0.7141 | 0.7052 | 0.7045 1.1321 |               |
|              |                                                                                                  | LVLTLDK                     | 4 | 0.6542   | 0.6534   | 1.0584 |   |         |         |        |        |               |               |
| ALDOA_HUMAN  | Fructose-bisphosphate aldolase A OS/Homo sapiens GN=ALDOA PE=1 SV=2                              | AQGEIYVK                    | 1 | 7.5227   | 7.5227   |        | 8 | 5.3322  | 5.2095  | 5.1125 | 5.0205 | 4.8555 1.3738 |               |
|              |                                                                                                  | ADQRPPVQK                   | 1 | 3.9942   | 3.9942   |        |   |         |         |        |        |               |               |
|              |                                                                                                  | ALANSACQGG                  | 3 | 5.0352   | 4.9038   | 1.3365 |   |         |         |        |        |               |               |
|              |                                                                                                  | GLGVQVK                     | 1 | 4.3313   | 4.3313   |        |   |         |         |        |        |               |               |
|              |                                                                                                  | GLADESTGSAK                 | 3 | 6.5149   | 6.1111   | 1.5851 |   |         |         |        |        |               |               |
|              |                                                                                                  | VLAAYK                      | 1 | 5.9101   | 5.9101   |        |   |         |         |        |        |               |               |
|              |                                                                                                  | VNPGQGVLFTELQVK             | 1 | 6.8714   | 6.8714   |        |   |         |         |        |        |               |               |
|              |                                                                                                  | WASIQCOGQVVPVEELPDQGHDK     | 3 | 3.5875   | 3.3534   | 1.5487 |   |         |         |        |        |               |               |
| ALDOB_HUMAN  | Fructose-bisphosphate aldolase B OS/Homo sapiens GN=ALDOB PE=1 SV=2                              | VLAAYK                      | 1 | 5.9101   | 5.9101   |        |   | 5.9101  | 5.9101  | 5.9101 | 5.9101 | 5.9101        |               |
| ALDOC_HUMAN  | Fructose-bisphosphate aldolase C OS/Homo sapiens GN=ALDOC PE=1 SV=2                              | VASIQCOGQVVPVEELPDQGHDK     | 1 | 5.9101   | 5.9101   |        |   | 5.7488  | 4.981   | 4.6045 | 4.0943 | 3.8658 1.4233 |               |
|              |                                                                                                  |                             | 3 | 3.5875   | 3.3534   | 1.5487 |   |         |         |        |        |               |               |
| AMEL_HUMAN   | Cofactor aminopeptidase OS/Homo sapiens GN=AMEL PE=1 SV=2                                        | IKKAK                       | 1 | 2.9217   | 2.9217   |        |   | 2.9217  | 2.9217  | 2.9217 | 2.9217 | 2.9217        |               |
| ANAPL_HUMAN  | Acidic leucine-rich nuclear phosphoprotein 32 family member A OS/Homo sapiens GN=ANAPL PE=1 SV=1 | IKDLSIEPKL                  | 1 | 2.7125   | 2.7125   |        |   | 2.6197  | 2.6197  | 1.9539 | 1.9539 | 1.9539 2.8481 |               |
|              |                                                                                                  | SLDFNCEVLTNDVYR             | 1 | 0.9036   | 0.8956   |        |   |         |         |        |        |               |               |
|              |                                                                                                  | VSGGLEVAEK                  | 1 | 4.5411   | 4.5411   |        |   |         |         |        |        |               |               |
| ANAP2_HUMAN  | Acidic leucine-rich nuclear phosphoprotein 32 family member B OS/Homo sapiens GN=ANAP2 PE=1 SV=1 | IFGGLDMLAEK                 | 1 | 8.3987   | 8.3987   |        |   | 5.5556  | 5.5556  | 4.773  | 4.773  | 4.773 2.2327  |               |
|              |                                                                                                  | LKIDSLIEPKL                 | 1 | 2.7125   | 2.7125   |        |   |         |         |        |        |               |               |
| ANAP3_HUMAN  | Acidic leucine-rich nuclear phosphoprotein 32 family member C OS/Homo sapiens GN=ANAP3 PE=2 SV=1 | IKDLSIEPKL                  | 1 | 2.7125   | 2.7125   |        |   | 3.6268  | 3.6268  | 3.5097 | 3.5097 | 3.5097 1.4398 |               |
|              |                                                                                                  | VSGGLEVAEK                  | 1 | 4.5411   | 4.5411   |        |   |         |         |        |        |               |               |
| ANAP3_HUMAN  | Acidic leucine-rich nuclear phosphoprotein 32 family member D OS/Homo sapiens GN=ANAP3 PE=1 SV=2 | IKDLSIEPKL                  | 1 | 2.7125   | 2.7125   |        |   | 2.7125  | 2.7125  | 2.7125 | 2.7125 | 2.7125        |               |
| ANAPL_HUMAN  | Protein arginase N-methyltransferase 1 OS/Homo sapiens GN=ANAPL PE=1 SV=2                        | IKKAK                       | 1 | 146.7059 | 143.7059 |        |   | 50.6405 | 50.6405 | 10.834 | 10.834 | 10.834 9.6749 |               |
|              |                                                                                                  | VEDLTFSPFLQVYK              | 1 | 2.1214   | 2.1214   |        |   |         |         |        |        |               |               |
|              |                                                                                                  | VQLVDSSTGCGPMFQA            | 1 | 3.8432   | 3.8432   |        |   |         |         |        |        |               |               |
| ANXA1_HUMAN  | Annexin A1 OS/Homo sapiens GN=ANXA1 PE=1 SV=2                                                    | GLGTDTELEASR                | 1 | 4.681    | 4.681    |        |   | 4.9442  | 4.9442  | 4.9398 | 4.9398 | 4.9398 1.0896 |               |
|              |                                                                                                  | GVDAETIELTK                 | 1 | 2.2353   | 2.2353   |        |   |         |         |        |        |               |               |
| ANXA2_HUMAN  | Annexin A2 OS/Homo sapiens GN=ANXA2 PE=1 SV=2                                                    | DANLNTAK                    | 1 | 4.3842   | 4.3842   |        |   | 4.3547  | 4.3547  | 4.3544 | 4.3544 | 4.3544 1.0185 |               |
|              |                                                                                                  | SALSGLETLVGLGK              | 1 | 4.4052   | 4.4052   |        |   |         |         |        |        |               |               |
| ANXA3_HUMAN  | Annexin A3 OS/Homo sapiens GN=ANXA3 PE=1 SV=2                                                    | ETSONLLELVAVK               | 3 | 3.7544   | 3.9508   | 1.2611 |   | 3.2157  | 3.4851  | 3.1703 | 3.45   | 3.4061 1.2702 |               |
|              |                                                                                                  | YDQELK                      | 1 | 2.677    | 2.677    |        |   |         |         |        |        |               |               |
| AP2A_HUMAN   | AP-2 complex subunit alpha 1 OS/Homo sapiens GN=AP2A PE=1 SV=3                                   | TSVQVQNSPTVWVPSQLQQLAVGK    | 1 | 2.1857   | 2.1857   |        |   | 2.1857  | 2.1857  | 2.1857 | 2.1857 | 2.1857        |               |
| AP2B_HUMAN   | Apoptosis inhibitor 2 OS/Homo sapiens GN=AP2B PE=1 SV=2                                          | DARVQLDLYK                  | 1 | 3.9013   | 3.9013   |        |   | 3.9013  | 3.9013  | 3.9013 | 3.9013 | 3.9013        |               |
| AP2C1_HUMAN  | Apoptosis inhibitor 1 OS/Homo sapiens GN=AP2C1 PE=1 SV=1                                         | EQQNGTGTGVEVKLEK            | 1 | 1.2148   | 1.2148   |        |   | 1.3862  | 1.3862  | 1.3862 | 1.3862 | 1.3712        |               |
| ARF1_HUMAN   | ADP-ribosylation factor 1 OS/Homo sapiens GN=ARF1 PE=1 SV=2                                      | DALLVFAAK                   | 1 | 5.1745   | 5.1745   |        |   | 5.1745  | 5.1745  | 5.1745 | 5.1745 | 5.1745        |               |
| ARF3_HUMAN   | ADP-ribosylation factor 3 OS/Homo sapiens GN=ARF3 PE=1 SV=2                                      | DALLVFAAK                   | 1 | 21.2682  | 9.5131   | 2.3311 |   | 7.4758  | 8.7399  | 6.4425 | 7.7623 | 6.9338 2.2048 |               |
|              |                                                                                                  | NRFTLVWQGGDQK               | 1 | 3.683    | 3.683    |        |   |         |         |        |        |               |               |
| ARF5_HUMAN   | ADP-ribosylation factor 5 OS/Homo sapiens GN=ARF5 PE=1 SV=2                                      | DALLVFAAK                   | 3 | 9.2369   | 7.655    | 2.0019 |   | 9.2369  | 9.2369  | 9.2369 | 9.2369 | 7.7665        |               |
| ARF6_HUMAN   | ADP-ribosylation factor 6 OS/Homo sapiens GN=ARF6 PE=1 SV=2                                      | KYENLTK                     | 1 | 0.1213   | 0.1213   |        |   | 0.1213  | 0.1213  | 0.1213 | 0.1213 | 0.1213        |               |
| ARF7_HUMAN   | ADP-ribosylation factor 7 OS/Homo sapiens GN=ARF7 PE=1 SV=2                                      | FIMEGCVK                    | 1 | 1.6232   | 1.6232   |        |   |         |         |        |        |               |               |
| ARF9_HUMAN   | Actin-related protein 3 OS/Homo sapiens GN=ARF9 PE=1 SV=3                                        | GVDDLDFFGDEAEKPTVYK         | 3 | 6.256    | 6.1286   | 1.2785 |   | 4       | 3.1053  | 4.1555 | 2.5887 | 3.4739        | 3.4378 1.5792 |
|              |                                                                                                  | YNSVLSK                     | 1 | 1.4138   | 1.4138   |        |   |         |         |        |        |               |               |
|              |                                                                                                  | TLTGTVDSDVGGVIVPVEELPDQGHDK | 2 | 3.1282   | 3.1282   |        |   |         |         |        |        |               |               |
| ARPC3_HUMAN  | Actin-related protein 2/3 complex subunit 3 OS/Homo sapiens GN=ARPC3 PE=1 SV=3                   | NEEDVDYAVYK                 | 1 | 4.5876   | 4.5876   |        |   | 4.5876  | 4.5876  | 4.5876 | 4.5876 | 4.5876        |               |
|              |                                                                                                  | ITGGGGADMLLAK               | 1 | 0.1261   | 0.1261   |        |   | 0.1261  | 0.1261  | 0.1261 | 0.1261 | 0.1261        |               |
|              |                                                                                                  | DTEGQSDALEQK                | 1 | 0.2175   | 0.2175   |        |   | 0.2175  | 0.2175  | 0.2175 | 0.2175 | 0.2175        |               |
| AXIN1_HUMAN  | Axinin-2-like protein OS/Homo sapiens GN=AXIN1 PE=1 SV=2                                         | DALNLETAK                   | 1 | 4.3042   | 4.3042   |        |   | 4.3547  | 4.3547  | 4.3544 | 4.3544 | 4.3544 1.0185 |               |
| AXIN2_HUMAN  | Axinin-2-like protein OS/Homo sapiens GN=AXIN2 PE=1 SV=2                                         | SALSGLETLVGLGK              | 1 | 4.4052   | 4.4052   |        |   |         |         |        |        |               |               |
| AXIN2L_HUMAN | Putative axinin-2-like protein OS/Homo sapiens GN=AXIN2L PE=1 SV=2                               | SALSGLETLVGLGK              | 1 | 4.4052   | 4.4052   |        |   |         |         |        |        |               |               |
| B2M2_HUMAN   | Beta-2-microglobulin OS/Homo sapiens GN=B2M PE=1 SV=1                                            | SNLFNCYVPSVFSDIVLQK         | 1 | 0.7169   | 0.7169   |        |   | 0.8605  | 0.8732  | 0.6405 | 0.6283 | 0.6542 1.5339 |               |
|              |                                                                                                  | VEHSLSFSK                   | 2 | 0.3939   | 0.3735   | 1.5924 |   |         |         |        |        |               |               |
|              |                                                                                                  | VHNSVLSK                    | 2 | 0.8006   | 0.8642   | 1.7344 |   |         |         |        |        |               |               |
| BAF_HUMAN    | Barren-1a auto-integration factor OS/Homo sapiens GN=BAF1 PE=1 SV=1                              | AVYVLGDFYK                  | 1 | 7.2656   | 7.2656   |        |   | 7.2656  | 7.2656  | 7.2656 | 7.2656 | 7.2656        |               |
| BAG1_HUMAN   | Basigin OS/Homo sapiens GN=BAG1 PE=1 SV=2                                                        | ITDSEK                      | 1 | 0.2404   | 0.2404   |        |   | 0.2404  | 0.2404  | 0.2404 | 0.2404 | 0.2404        |               |
| BGAT1_HUMAN  | Branched-chain amino acid aminotransferase cytosolic OS/Homo sapiens GN=BGAT1 PE=1 SV=3          | ATLVFDGKELRQGGDQVYK         | 1 | 1.1639   | 1.1639   |        |   | 1.1639  | 1.1639  | 1.1639 | 1.1639 | 1.1639        |               |
| BGHS1_HUMAN  | Transforming growth factor-beta-induced protein 3 OS/Homo sapiens GN=BGHS1 PE=1 SV=1             | DLNHNLIK                    | 1 | 0.0457   | 0.0457   |        |   | 9.4094  | 0.3382  | 0.2211 | 0.1915 | 0.1252 2.928  |               |
|              |                                                                                                  | EGVYTVAPNFAEYK              | 1 | 1.9807   | 1.9807   |        |   |         |         |        |        |               |               |
|              |                                                                                                  | ELANKK                      | 1 | 0.2978   | 0.2978   |        |   |         |         |        |        |               |               |
|              |                                                                                                  | GDELDLAEQVK                 | 3 | 0.1121   | 0.1134   | 1.5855 |   |         |         |        |        |               |               |
|              |                                                                                                  | LTLGLANSFKYK                | 2 | 0.1891   | 0.1037   | 2.4596 |   |         |         |        |        |               |               |
|              |                                                                                                  | QGLNHLSSSEYK                | 1 | 0.2097   | 0.2097   |        |   |         |         |        |        |               |               |
|              |                                                                                                  | SPYQLDQSR                   | 1 | 0.8004   | 0.8004   |        |   |         |         |        |        |               |               |
|              |                                                                                                  | WTRKQAVNVGLK                | 1 | 0.1348   | 0.1348   |        |   |         |         |        |        |               |               |
|              |                                                                                                  | VYHSQTELELGGK               | 1 | 0.1348   | 0.1348   |        |   |         |         |        |        |               |               |
| BEL1_HUMAN   | Brefeldin A inhibited guanine nucleotide exchange protein 1 OS/Homo sapiens GN=BEL1 PE=1 SV=3    | KLEGLVSKL                   | 1 | 0.049    | 0.049    |        |   | 0.049   | 0.049   | 0.049  | 0.049  | 0.049         |               |
| BEL2_HUMAN   | Brefeldin A inhibited guanine nucleotide exchange protein 2 OS/Homo sapiens GN=BEL2 PE=1 SV=2    | KSEGLVSKL                   | 1 | 0.049    | 0.049    |        |   | 0.049   | 0.049   | 0.049  | 0.049  | 0.049         |               |
| BLM1_HUMAN   | Biomycin hydrolase OS/Homo sapiens GN=BLM1 PE=1 SV=1                                             | LNSPDRAAGGVTHLIDGLK         | 1 | 0.4025   | 0.4025   |        |   | 0.4025  | 0.4025  | 0.4025 | 0.4025 | 0.4025        |               |
| BNPT1_HUMAN  | 3/2',5'-bisphosphate nucleotidylase 1 OS/Homo sapiens GN=BNPT1 PE=1 SV=2                         | LIDKHWLVQYK                 | 1 | 0.2594   | 0.2594   |        |   | 0.2594  | 0.2594  | 0.2594 | 0.2594 | 0.2594        |               |
| BRE1A_HUMAN  | E3 ubiquitin-protein ligase BRE1A OS/Homo sapiens GN=BRE1A PE=1 SV=2                             | LMSRKK                      | 1 | 3.8396   | 3.8396   |        |   | 3.8396  | 3.8396  | 3.8396 | 3.8396 | 3.8396        |               |
| BRE1B_HUMAN  | E3 ubiquitin-protein ligase BRE1B OS/Homo sapiens GN=BRE1B PE=1 SV=3                             | LMSRKK                      | 1 | 3.8396   | 3.8396   |        |   | 3.8396  | 3.8396  | 3.8396 | 3.8396 | 3.8396        |               |
| CCR_HUMAN    | Complement C1r subcomponent OS/Homo sapiens GN=CCR PE=1 SV=2                                     | ESEGGVYICTAGWYK             | 2 | 0.4156   | 0.4095   | 1.2739 |   | 0.6661  | 0.6784  | 0.5554 | 0.5758 | 0.5724 1.5064 |               |
|              |                                                                                                  | GGGALGQR                    | 4 | 0.2443   | 0.2443   |        |   |         |         |        |        |               |               |
|              |                                                                                                  | LPVAPNACEWNLK               | 1 | 1.1623   | 1.1623   |        |   |         |         |        |        |               |               |
|              |                                                                                                  | QDQACGSSGGLVQVYK            | 3 | 0.3484   | 0.3484   |        |   |         |         |        |        |               |               |
|              |                                                                                                  | ORPPLDTSNVAWLVFTFDESDDR     | 1 | 1.1204   | 1.1204   |        |   |         |         |        |        |               |               |
|              |                                                                                                  | TDFEITQYGPYQVYK             | 2 | 1.0274   | 1.0149   | 1.2485 |   |         |         |        |        |               |               |
|              |                                                                                                  | YTTMGVNTYK                  | 1 | 0.3446   | 0.3446   |        |   |         |         |        |        |               |               |
| CTLR_HUMAN   | Complement C1r subcomponent-like protein OS/Homo sapiens GN=CTLR PE=1 SV=2                       | GGGALGQR                    | 1 | 0.2443   | 0.2443   |        |   | 0.2443  | 0.2443  | 0.2443 | 0.2443 | 0.2443        |               |
| C1S_HUMAN    | Complement C1s subcomponent OS/Homo sapiens GN=C1S PE=1 SV=1                                     | GFQVTVLR                    | 2 | 0.8527   | 0.7217   | 2.3153 | 8 | 3.7206  | 3.0838  | 0.669  | 0.6134 | 0.5891 5.0089 |               |
|              |                                                                                                  | CR1101                      | 1 | 26.3101  | 26.3101  |        |   |         |         |        |        |               |               |
|              |                                                                                                  | NYDWMYK                     | 2 | 0.2204   | 0.2127   | 1.4585 |   |         |         |        |        |               |               |
|              |                                                                                                  | GFQYVGHSGPPLQVETIK          | 1 | 1.2175   | 1.2175   |        |   |         |         |        |        |               |               |
|              |                                                                                                  | SNALDFQITDQK                | 1 | 0.2987   | 0.2987   |        |   |         |         |        |        |               |               |
|              |                                                                                                  | SSNHPSPVEEYQVYK             | 1 | 0.3624   | 0.3624   |        |   |         |         |        |        |               |               |
|              |                                                                                                  | TPWENSTPQK                  | 1 | 0.2416   | 0.2416   |        |   |         |         |        |        |               |               |
|              |                                                                                                  | TFNDQVAVYK                  | 1 | 0.2415   | 0.2415   |        |   |         |         |        |        |               |               |
| C1TN_HUMAN   | Macrophunctional C1r intrahelical catalytic subunit OS/Homo sapiens GN=C1TN PE=1 SV=1            | NRSLRER                     | 1 | 0.1398   | 0.1398   |        |   | 0.1398  | 0.1398  | 0.1398 | 0.1398 | 0.1398        |               |
| CD1D1_HUMAN  | Calnexin-13 OS/Homo sapiens GN=CD1D1 PE=1 SV=1                                                   | DOYSSLQDFK                  | 1 | 1.3996   | 1.3996   |        |   | 1.3996  | 1.3996  | 1.3996 | 1.3996 | 1.3996        |               |
| CAD34_HUMAN  | Calthra-5 OS/Homo sapiens GN=CAD34 PE=1 SV=1                                                     | TLEALYVQK                   | 1 | 2.2731   | 2.2731   |        |   | 2.2731  | 2.2731  | 2.2731 | 2.2731 | 2.2731        |               |
| CAD9_HUMAN   | Calthra-like protein 3 OS/Homo sapiens GN=CAD9 PE=1 SV=2                                         | ELTGLSTIPQK                 | 1 | 7.7699   | 7.7699   |        |   | 7.7699  | 7.7699  | 7.7699 | 7.7699 | 7.7699        |               |
| CALL1_HUMAN  | Calmodulin-like protein 3 OS/Homo sapiens GN=CALL1 PE=1 SV=2                                     | EFAFLSFGK                   | 2 | 2.7405   | 2.7405   | 1.3398 |   | 2.7405  | 2.7405  | 2.7405 | 2.7405 | 2.7405        |               |
| CALM_HUMAN   | Calmodulin OS/Homo sapiens GN=CALM PE=                                                           |                             |   |          |          |        |   |         |         |        |        |               |               |







| Accession   | Name                                                                              | Species      | Protein                    | Seq | NCBI   | UniProt | Ensembl | RefSeq | TrEMBL | SwissProt | InterPro | Protein |       |        |
|-------------|-----------------------------------------------------------------------------------|--------------|----------------------------|-----|--------|---------|---------|--------|--------|-----------|----------|---------|-------|--------|
| HNRPD_HUMAN | Heterogeneous nuclear ribonucleoprotein D0 OS=Homo sapiens GN=HNRPD PE=1 SV=1     | Homo sapiens | LYFGGGGEVESELPMDNK         | 2   | 53602  | 53601   | 10065   | 5      | 5,182  | 4,767     | 4,766    | 4,376   | 4,377 | 1,624  |
|             |                                                                                   |              | EFCTTTC                    | 1   | 52994  | 52994   |         |        |        |           |          |         |       |        |
|             |                                                                                   |              | GGFVLVF                    | 1   | 83606  | 83606   |         |        |        |           |          |         |       |        |
|             |                                                                                   |              | EVVGLSPDTPEEK              | 2   | 45337  | 45444   | 13124   |        |        |           |          |         |       |        |
|             |                                                                                   |              | MFIIGSLWDITTK              | 2   | 2031   | 2,165   | 2,132   |        |        |           |          |         |       |        |
|             |                                                                                   |              | EMTEWALK                   | 1   | 5,012  | 5,012   |         |        | 5,012  | 5,012     | 5,012    | 5,012   | 5,012 |        |
| HNRPF_HUMAN | Heterogeneous nuclear ribonucleoprotein F OS=Homo sapiens GN=HNRPF PE=1 SV=3      | Homo sapiens | GFATVTEERADAK              | 1   | 3,019  | 3,019   |         |        | 2,242  | 2,242     | 1,903    | 1,903   | 1,903 | 2,084  |
| HNRPD_HUMAN | Heterogeneous nuclear ribonucleoprotein G OS=Homo sapiens GN=HNRMG PE=1 SV=3      | Homo sapiens | FEVLLMK                    | 1   | 8,501  | 8,501   |         |        |        |           |          |         |       |        |
|             |                                                                                   |              | VEGATMSPFGSSR              | 1   | 6,246  | 6,246   |         |        |        |           |          |         |       |        |
| HNRPK_HUMAN | Heterogeneous nuclear ribonucleoprotein K OS=Homo sapiens GN=HNRPK PE=1 SV=1      | Homo sapiens | ELGDFRDEEIK                | 3   | 4,259  | 4,259   | 14,611  | 2      | 4,944  | 4,924     | 4,259    | 4,259   | 4,259 | 1,078  |
| HNRPD_HUMAN | Heterogeneous nuclear ribonucleoprotein D OS=Homo sapiens GN=SYNCRIN1 PE=1 SV=2   | Homo sapiens | ELNSSDALDK                 | 2   | 2,941  | 2,895   | 12,811  | 1      | 2,875  | 2,875     | 2,875    | 2,875   | 2,875 | 2,875  |
| HNRPK_HUMAN | Heterogeneous nuclear ribonucleoprotein K OS=Homo sapiens GN=HNRPM PE=1 SV=1      | Homo sapiens | ENEDRQAGAKDQK              | 1   | 2,879  | 2,879   |         |        | 2,879  | 2,879     | 2,879    | 2,879   | 2,879 |        |
| HNRPD_HUMAN | Heterogeneous nuclear ribonucleoprotein D OS=Homo sapiens GN=HNRPM PE=1 SV=1      | Homo sapiens | ENEGEALASQDQK              | 1   | 1,279  | 1,279   |         |        | 1,279  | 1,279     | 1,279    | 1,279   | 1,279 |        |
| HNRPK_HUMAN | Heterogeneous nuclear ribonucleoprotein K OS=Homo sapiens GN=HNRPM1 PE=1 SV=2     | Homo sapiens | NLVLEDFDTSK                | 1   | 7,613  | 7,613   |         |        | 4,234  | 4,234     | 3,332    | 3,332   | 3,332 | 5,426  |
| HNRPK_HUMAN | Heterogeneous nuclear ribonucleoprotein K OS=Homo sapiens GN=HNRPM1 PE=1 SV=2     | Homo sapiens | WSSDSLSTQK                 | 1   | 7,074  | 7,074   |         |        |        |           |          |         |       |        |
| HNRPD_HUMAN | Heterogeneous nuclear ribonucleoprotein D OS=Homo sapiens GN=HNRPM2 PE=1 SV=2     | Homo sapiens | LLLEAFQPR                  | 1   | 1,386  | 1,386   |         |        | 1,386  | 1,386     | 1,386    | 1,386   | 1,386 |        |
| HNRPK_HUMAN | Heterogeneous nuclear ribonucleoprotein K OS=Homo sapiens GN=HNRPM2 PE=1 SV=2     | Homo sapiens | INNEPAAAYGLDK              | 3   | 8,071  | 5,997   | 1,151   | 4      | 4,079  | 4,283     | 2,063    | 2,957   | 2,949 | 4,503  |
|             |                                                                                   |              | NALESYAFNMK                | 1   | 7,995  | 7,995   |         |        |        |           |          |         |       |        |
|             |                                                                                   |              | QTQFTYSNCPQLVLYEGER        | 1   | 4,163  | 4,163   |         |        |        |           |          |         |       |        |
|             |                                                                                   |              | VEIANGDGNR                 | 1   | 9,037  | 9,037   |         |        |        |           |          |         |       |        |
| HS902_HUMAN | Putative heat shock protein HSP 90-alpha A2 OS=Homo sapiens GN=HSP90AA2 PE=1 SV=2 | Homo sapiens | ADLNLGTLTK                 | 1   | 16,893 | 16,893  |         | 4      | 10,281 | 11,765    | 8,446    | 9,682   | 8,749 | 2,216  |
|             |                                                                                   |              | TLTVDTGKMTK                | 5   | 6,801  | 5,42    | 2,251   | 1      | 8,851  | 6,801     | 6,801    | 6,801   | 6,801 | 5,42   |
|             |                                                                                   |              | EGLLEPDEEEK                | 1   | 7,904  | 7,904   |         | 3      | 7,982  | 7,982     | 7,48     | 7,48    | 7,48  | 1,572  |
|             |                                                                                   |              | ELGLEPDEEEK                | 1   | 4,939  | 4,939   |         |        |        |           |          |         |       |        |
|             |                                                                                   |              | ELHNLPRK                   | 1   | 3,974  | 3,974   |         |        |        |           |          |         |       |        |
|             |                                                                                   |              | ELINSSDALDK                | 1   | 4,538  | 4,538   |         |        |        |           |          |         |       |        |
|             |                                                                                   |              | YDGEELNK                   | 2   | 16,718 | 12,974  | 2,852   |        |        |           |          |         |       |        |
| HS904_HUMAN | Putative heat shock protein HSP 90-alpha A4 OS=Homo sapiens GN=HSP90AA4 PE=5 SV=1 | Homo sapiens | TLTVDTGKMTK                | 5   | 6,801  | 5,42    | 2,251   | 1      | 8,851  | 6,801     | 6,801    | 6,801   | 6,801 | 5,42   |
| HS905_HUMAN | Putative heat shock protein HSP 90-alpha A3 OS=Homo sapiens GN=HSP90AA3 PE=1 SV=1 | Homo sapiens | EGLLEPDEEEK                | 1   | 7,904  | 7,904   |         |        |        |           |          |         |       |        |
|             |                                                                                   |              | ELGLEPDEEEK                | 1   | 4,939  | 4,939   |         |        |        |           |          |         |       |        |
|             |                                                                                   |              | ELHNLPRK                   | 1   | 3,974  | 3,974   |         |        |        |           |          |         |       |        |
|             |                                                                                   |              | ELINSSDALDK                | 1   | 4,538  | 4,538   |         |        |        |           |          |         |       |        |
|             |                                                                                   |              | EMLDQSK                    | 2   | 10,492 | 10,367  | 1,204   |        |        |           |          |         |       |        |
|             |                                                                                   |              | HSQFPYPTLVFK               | 1   | 11,416 | 11,416  |         |        |        |           |          |         |       |        |
|             |                                                                                   |              | NPDITNEYGEFYK              | 1   | 11,367 | 11,367  | 1,053   |        |        |           |          |         |       |        |
|             |                                                                                   |              | SLTNWEDHLWAK               | 1   | 5,881  | 5,881   |         |        |        |           |          |         |       |        |
|             |                                                                                   |              | TLTVDTGKMTK                | 5   | 6,801  | 5,42    | 2,251   |        |        |           |          |         |       |        |
|             |                                                                                   |              | YELVDSQK                   | 2   | 19,334 | 17,484  | 1,907   |        |        |           |          |         |       |        |
|             |                                                                                   |              | YDGEELNK                   | 2   | 16,718 | 12,974  | 2,852   |        |        |           |          |         |       |        |
| HS906_HUMAN | Heat shock protein HSP 90-beta OS=Homo sapiens GN=HSP90B1 PE=1 SV=4               | Homo sapiens | ADLNLGTLTK                 | 1   | 16,893 | 16,893  |         | 14     | 9,992  | 10,063    | 8,363    | 8,775   | 7,945 | 2,058  |
|             |                                                                                   |              | CELEFELADKNVYK             | 1   | 8,108  | 8,108   |         |        |        |           |          |         |       |        |
|             |                                                                                   |              | ELGLEPDEEEK                | 1   | 7,904  | 7,904   |         |        |        |           |          |         |       |        |
|             |                                                                                   |              | ELGLEPDEEEK                | 1   | 4,939  | 4,939   |         |        |        |           |          |         |       |        |
|             |                                                                                   |              | ELHNLPRK                   | 1   | 3,974  | 3,974   |         |        |        |           |          |         |       |        |
|             |                                                                                   |              | ELINSSDALDK                | 3   | 9,036  | 7,912   | 1,874   |        |        |           |          |         |       |        |
|             |                                                                                   |              | EMLDQSK                    | 2   | 10,492 | 10,367  | 1,204   |        |        |           |          |         |       |        |
|             |                                                                                   |              | HSQFPYPTLVFK               | 1   | 11,416 | 11,416  |         |        |        |           |          |         |       |        |
|             |                                                                                   |              | NPDITNEYGEFYK              | 1   | 11,367 | 11,367  | 1,053   |        |        |           |          |         |       |        |
|             |                                                                                   |              | SLTNWEDHLWAK               | 1   | 5,881  | 5,881   |         |        |        |           |          |         |       |        |
|             |                                                                                   |              | TLTVDTGKMTK                | 5   | 6,801  | 5,42    | 2,251   |        |        |           |          |         |       |        |
|             |                                                                                   |              | YELVDSQK                   | 2   | 19,334 | 17,484  | 1,907   |        |        |           |          |         |       |        |
|             |                                                                                   |              | YDGEELNK                   | 2   | 16,718 | 12,974  | 2,852   |        |        |           |          |         |       |        |
| HSPT1_HUMAN | Heat shock 70 kDa protein 1 OS=Homo sapiens GN=HSPA1A PE=1 SV=5                   | Homo sapiens | AAAGDGLTYSYGVVGHGK         | 1   | 5,276  | 5,276   |         | 4      | 3,945  | 3,945     | 2,019    | 2,019   | 2,019 | 4,412  |
|             |                                                                                   |              | NALESYAFNMK                | 1   | 7,995  | 7,995   |         |        |        |           |          |         |       |        |
|             |                                                                                   |              | QTQFTYSNCPQLVLYEGER        | 1   | 4,163  | 4,163   |         |        |        |           |          |         |       |        |
|             |                                                                                   |              | VEIANGDGNR                 | 1   | 9,037  | 9,037   |         |        |        |           |          |         |       |        |
| HSPT2_HUMAN | Heat shock-related 70 kDa protein 2 OS=Homo sapiens GN=HSPA2 PE=1 SV=1            | Homo sapiens | DNKLGLK                    | 2   | 10,874 | 10,395  | 1,504   | 5      | 9,454  | 8,775     | 9,249    | 8,479   | 8,357 | 1,283  |
|             |                                                                                   |              | FEELMADR                   | 1   | 10,516 | 10,516  |         |        |        |           |          |         |       |        |
|             |                                                                                   |              | INNEPAAAYGLDK              | 3   | 8,071  | 5,997   | 1,151   |        |        |           |          |         |       |        |
|             |                                                                                   |              | INNEPAAAYGLDK              | 1   | 10,764 | 10,764  |         |        |        |           |          |         |       |        |
|             |                                                                                   |              | VEIANGDGNR                 | 1   | 9,037  | 9,037   |         |        |        |           |          |         |       |        |
| HSPT4_HUMAN | Heat shock 70 kDa protein 4 OS=Homo sapiens GN=HSPA4 PE=1 SV=4                    | Homo sapiens | FEELGK                     | 1   | 9,062  | 9,062   |         | 2      | 1,374  | 1,374     | 4,213    | 4,213   | 4,213 | 13,701 |
|             |                                                                                   |              | SNLVAVLPTGLGK              | 1   | 2,618  | 2,618   |         |        |        |           |          |         |       |        |
| HSPT6_HUMAN | Heat shock 70 kDa protein 6 OS=Homo sapiens GN=HSPA6 PE=1 SV=2                    | Homo sapiens | VEIANGDGNR                 | 1   | 9,037  | 9,037   |         | 1      | 9,037  | 9,037     | 9,037    | 9,037   | 9,037 | 9,037  |
| HSPTC_HUMAN | Heat shock cognate 71 kDa protein OS=Homo sapiens GN=HSPAB PE=1 SV=1              | Homo sapiens | CHENLWLDK                  | 2   | 13,988 | 13,243  | 1,201   | 15     | 7,368  | 7,294     | 5,909    | 6,109   | 5,908 | 2,259  |
|             |                                                                                   |              | DNKLGLK                    | 1   | 10,764 | 10,764  |         |        |        |           |          |         |       |        |
|             |                                                                                   |              | EAEAVLGK                   | 1   | 7,815  | 7,815   |         |        |        |           |          |         |       |        |
|             |                                                                                   |              | FDVWDSQDMK                 | 1   | 2,708  | 2,708   |         |        |        |           |          |         |       |        |
|             |                                                                                   |              | FEELMADR                   | 1   | 10,516 | 10,516  |         |        |        |           |          |         |       |        |
|             |                                                                                   |              | GPVADGLTYSYGVVGHGK         | 2   | 4,173  | 3,149   | 2,981   |        |        |           |          |         |       |        |
|             |                                                                                   |              | GLDLYPK                    | 1   | 1,392  | 1,392   |         |        |        |           |          |         |       |        |
|             |                                                                                   |              | INNEPAAAYGLDK              | 3   | 8,071  | 5,997   | 1,151   |        |        |           |          |         |       |        |
|             |                                                                                   |              | INNEPAAAYGLDK              | 1   | 10,764 | 10,764  |         |        |        |           |          |         |       |        |
|             |                                                                                   |              | MVNHFIEFK                  | 1   | 8,517  | 8,517   |         |        |        |           |          |         |       |        |
|             |                                                                                   |              | NQVANNPTVYDAK              | 1   | 10,138 | 10,138  |         |        |        |           |          |         |       |        |
|             |                                                                                   |              | RFQDLYVQDMK                | 1   | 9,266  | 9,266   |         |        |        |           |          |         |       |        |
|             |                                                                                   |              | RFQDLYVQDMK                | 3   | 4,745  | 4,871   | 1,284   |        |        |           |          |         |       |        |
|             |                                                                                   |              | SFQYVESSMLTK               | 1   | 9,007  | 9,007   |         |        |        |           |          |         |       |        |
|             |                                                                                   |              | SINQDAVQVAQALASQSK         | 1   | 9,007  | 9,007   |         |        |        |           |          |         |       |        |
|             |                                                                                   |              | VEIANGDGNR                 | 1   | 9,037  | 9,037   |         |        |        |           |          |         |       |        |
| HSPT8_HUMAN | Heat shock protein beta-1 OS=Homo sapiens GN=HSPB1 PE=1 SV=2                      | Homo sapiens | ADGGPEAK                   | 1   | 9,477  | 9,477   |         | 3      | 2,505  | 2,878     | 1,795    | 2,125   | 2,082 | 3,192  |
|             |                                                                                   |              | KYLLPPDVTQFVSSKGLTLVEAEMPK | 2   | 3,854  | 3,854   | 1,944   |        |        |           |          |         |       |        |
|             |                                                                                   |              | TQDVGWTEGK                 | 1   | 3,456  | 3,456   |         |        |        |           |          |         |       |        |
| HTRA1_HUMAN | Serine protease HTRA1 OS=Homo sapiens GN=HTRA1 PE=1 SV=1                          | Homo sapiens | DADGGDDEINRSLK             | 1   | 1,347  | 1,347   |         | 3      | 3,307  | 3,307     | 2,129    | 2,129   | 2,129 | 2,930  |
|             |                                                                                   |              | SEELRPEFVAWSPPSLGVTQSTQTR  | 1   | 1,845  | 1,845   |         |        |        |           |          |         |       |        |
|             |                                                                                   |              | VTEVSPASQK                 | 1   | 7,526  | 7,526   |         |        |        |           |          |         |       |        |
| IBP4_HUMAN  | Insulin-like growth factor-binding protein 4 OS=Homo sapiens GN=IGFBP4 PE=1 SV=2  | Homo sapiens | EDARNPQSQQLSRLH            | 1   | 8,247  | 8,247   |         | 2      | 8,334  | 8,334     | 6,332    | 6,332   | 6,332 | 1,544  |
|             |                                                                                   |              | THELVIPPCNDK               | 1   | 4,558  | 4,558   |         |        |        |           |          |         |       |        |
| IBP5_HUMAN  | Insulin-like growth factor-binding protein 5 OS=Homo sapiens GN=IGFBP5 PE=1 SV=1  | Homo sapiens | ALSMCPSPGLGCELYK           | 2   | 4,825  | 1,812   | 15,051  | 5      | 1,536  | 2,069     | 6,524    | 7,268   | 5,066 | 4,543  |
|             |                                                                                   |              | EHEFTTMAEYTSK              | 1   | 9,372  | 9,372   |         |        |        |           |          |         |       |        |
|             |                                                                                   |              | ICWCVDK                    | 1   | 3,394  | 3,394   |         |        |        |           |          |         |       |        |
|             |                                                                                   |              | GVLSNEK                    | 1   | 4,178  | 4,178   | 1,062   |        |        |           |          |         |       |        |
|             |                                                                                   |              | HMAEAGEK                   | 1   | 1,124  | 1,124   |         |        |        |           |          |         |       |        |
| IBP6_HUMAN  | Insulin-like growth factor-binding protein 6 OS=Homo sapiens GN=IGFBP6 PE=1 SV=1  | Homo sapiens | APVAVLEPK                  | 1   | 1,172  | 1,172   |         | 4      | 1,421  | 1,396     | 9,847    | 9,584   | 9,584 | 3,763  |
|             |                                                                                   |              | EGEGCGYVYTPAFLQKSPQDEAPLR  | 1   | 3,986  | 3,986   |         |        |        |           |          |         |       |        |
|             |                                                                                   |              | GAQTVLPVPCDHR              | 2   | 1,262  | 1,261   | 1,027   |        |        |           |          |         |       |        |
|             |                                                                                   |              | HESDLDQLGLVLYK             | 1   | 1,182  | 1,182   |         |        |        |           |          |         |       |        |
| IBP7_HUMAN  | Insulin-like growth factor-binding protein 7 OS=Homo sapiens GN=IGFBP7 PE=1 SV=1  | Homo sapiens | AGAAAGQPVSVYK              | 1   | 1,     |         |         |        |        |           |          |         |       |        |



| Gene         | Species | Description                                                       | Accession                                                                                                                                                                                                                                     | Score                                                                             | E-value                                                                                                                                                  | Score                                                                                                                                                    | E-value | Score   | E-value | Score   | E-value |   |   |    |
|--------------|---------|-------------------------------------------------------------------|-----------------------------------------------------------------------------------------------------------------------------------------------------------------------------------------------------------------------------------------------|-----------------------------------------------------------------------------------|----------------------------------------------------------------------------------------------------------------------------------------------------------|----------------------------------------------------------------------------------------------------------------------------------------------------------|---------|---------|---------|---------|---------|---|---|----|
| KIF14        | HUMAN   | Kinesin-like protein KIF14 OS=Homo sapiens GN=KIF14 PE=1 SV=1     | NFGTSSVPIVEAKTYNGK                                                                                                                                                                                                                            | 1                                                                                 | 0.416                                                                                                                                                    | 0.416                                                                                                                                                    | 1       | 0.416   | 0.416   | 0.416   | 0.416   |   |   |    |
| KIF7         | HUMAN   | Kinesin-like protein KIF7 OS=Homo sapiens GN=KIF7 PE=1 SV=2       | ELANNK                                                                                                                                                                                                                                        | 1                                                                                 | 0.2604                                                                                                                                                   | 0.2604                                                                                                                                                   | 1       | 0.2604  | 0.2604  | 0.2604  | 0.2604  |   |   |    |
| KPYM         | HUMAN   | Pyruvate kinase isozymes M1/M2 OS=Homo sapiens GN=PKM2 PE=1 SV=4  | AEQSDNANLADKDMGSEGTAK<br>AGKPYCATMLESIMK<br>CDENLIRIIVK<br>GADFLVTEVGGSLGSK<br>GDLGPIPAK<br>GDVVVLTQWPGGGPFTNMR<br>GIFPLVK<br>GSGTIEVLK<br>ITLNDVIMYK<br>FYDDGLSGLVQ<br>LAPITSDPEFAVAVASFSK<br>SVETLK<br>TATESFASGHPDFAHVALDYK                | 1<br>2<br>2<br>2<br>1<br>1<br>1<br>1<br>2<br>2<br>2<br>2<br>1                     | 4.3976<br>6.1886<br>4.7221<br>6.2343<br>8.3366<br>1.6059<br>9.7074<br>7.5448<br>4.7541<br>7.0711<br>6.867<br>6.0856<br>6.5337                            | 4.3975<br>4.9019<br>4.7221<br>6.1248<br>8.3366<br>1.6059<br>9.7074<br>7.5448<br>4.7541<br>7.0058<br>6.866<br>6.0856<br>2.2426                            | 1       | 13      | 1       | 1       | 1       | 1 | 1 | 13 |
| KPYR         | HUMAN   | Pyruvate kinase isozymes R/L OS=Homo sapiens GN=PKLR PE=1 SV=2    | CSLGEIPK                                                                                                                                                                                                                                      | 1                                                                                 | 8.3366                                                                                                                                                   | 8.3366                                                                                                                                                   | 1       | 8.3366  | 8.3366  | 8.3366  | 8.3366  |   |   |    |
| KRT34        | HUMAN   | Keratin, type I cuticular H44 OS=Homo sapiens GN=KRT34 PE=1 SV=2  | ETMFLNDR                                                                                                                                                                                                                                      | 1                                                                                 | 3.1326                                                                                                                                                   | 3.1326                                                                                                                                                   | 1       | 3.1326  | 3.1326  | 3.1326  | 3.1326  |   |   |    |
| KRT35        | HUMAN   | Keratin, type I cuticular H45 OS=Homo sapiens GN=KRT35 PE=2 SV=4  | LAAQDF<br>SDELAGVSKLLELLK                                                                                                                                                                                                                     | 2<br>1                                                                            | 0.2329<br>25.8312                                                                                                                                        | 0.7208<br>1.024                                                                                                                                          | 2       | 13.2761 | 9.091   | 4.3153  | 2.3766  |   |   |    |
| KRT36        | HUMAN   | Keratin, type I cuticular H46 OS=Homo sapiens GN=KRT36 PE=1 SV=1  | ETMFLNDR<br>LAAQDF                                                                                                                                                                                                                            | 1<br>1                                                                            | 3.1326<br>0.7208                                                                                                                                         | 3.1326                                                                                                                                                   | 2       | 1.9268  | 1.5248  | 1.5028  | 1.1764  |   |   |    |
| KRT37        | HUMAN   | Keratin, type I cuticular H47 OS=Homo sapiens GN=KRT37 PE=2 SV=3  | LAAQDF                                                                                                                                                                                                                                        | 2                                                                                 | 0.7209                                                                                                                                                   | 0.7208                                                                                                                                                   | 1.024   | 1       | 0.7209  | 0.7209  | 0.7209  |   |   |    |
| KRT38        | HUMAN   | Keratin, type I cuticular H48 OS=Homo sapiens GN=KRT38 PE=2 SV=3  | ETMFLNDR<br>LAAQDF                                                                                                                                                                                                                            | 1<br>1                                                                            | 3.1326<br>0.7208                                                                                                                                         | 3.1326                                                                                                                                                   | 2       | 1.9207  | 1.9207  | 1.4901  | 1.4901  |   |   |    |
| KRT81        | HUMAN   | Keratin, type II cuticular H81 OS=Homo sapiens GN=KRT81 PE=1 SV=2 | FLGQNK                                                                                                                                                                                                                                        | 3                                                                                 | 8.9734                                                                                                                                                   | 8.9749                                                                                                                                                   | 1.1139  | 1       | 8.9734  | 8.9734  | 8.9734  |   |   |    |
| KRT82        | HUMAN   | Keratin, type II cuticular H82 OS=Homo sapiens GN=KRT82 PE=1 SV=3 | LAGLEALFK                                                                                                                                                                                                                                     | 1                                                                                 | 0.6307                                                                                                                                                   | 0.6307                                                                                                                                                   | 1       | 0.6307  | 0.6307  | 0.6307  | 0.6307  |   |   |    |
| KRT83        | HUMAN   | Keratin, type II cuticular H83 OS=Homo sapiens GN=KRT83 PE=1 SV=2 | FLGQNK                                                                                                                                                                                                                                        | 2                                                                                 | 8.4278                                                                                                                                                   | 8.414                                                                                                                                                    | 1.0768  | 1       | 8.4278  | 8.4278  | 8.4278  |   |   |    |
| KRT84        | HUMAN   | Keratin, type I cuticular H84 OS=Homo sapiens GN=KRT84 PE=1 SV=1  | FASFDK<br>FLGQNK<br>FLGQNK                                                                                                                                                                                                                    | 1<br>3<br>3                                                                       | 0.9568<br>8.9734<br>12.1601                                                                                                                              | 0.9568<br>8.9349<br>12.1517                                                                                                                              | 1.0985  | 3       | 7.0118  | 9.2029  | 4.8951  |   |   |    |
| KRT85        | HUMAN   | Keratin, type II cuticular H85 OS=Homo sapiens GN=KRT85 PE=1 SV=1 | FLGQNK                                                                                                                                                                                                                                        | 3                                                                                 | 8.9734                                                                                                                                                   | 8.9349                                                                                                                                                   | 1.1139  | 1       | 8.9734  | 8.9734  | 8.9734  |   |   |    |
| KRT86        | HUMAN   | Keratin, type II cuticular H86 OS=Homo sapiens GN=KRT86 PE=1 SV=1 | FLGQNK                                                                                                                                                                                                                                        | 3                                                                                 | 8.9734                                                                                                                                                   | 8.9349                                                                                                                                                   | 1.1139  | 1       | 8.9734  | 8.9734  | 8.9734  |   |   |    |
| KRT87        | HUMAN   | Keratin, type II cuticular H87 OS=Homo sapiens GN=KRT87 PE=1 SV=1 | FLGQNK                                                                                                                                                                                                                                        | 2                                                                                 | 8.4278                                                                                                                                                   | 8.414                                                                                                                                                    | 1.0768  | 1       | 8.4278  | 8.4278  | 8.4278  |   |   |    |
| KRT88        | HUMAN   | Keratin, type II cuticular H88 OS=Homo sapiens GN=KRT88 PE=1 SV=1 | FLGQNK                                                                                                                                                                                                                                        | 3                                                                                 | 8.9734                                                                                                                                                   | 8.9349                                                                                                                                                   | 1.1139  | 1       | 8.9734  | 8.9734  | 8.9734  |   |   |    |
| KRT89        | HUMAN   | Keratin, type II cuticular H89 OS=Homo sapiens GN=KRT89 PE=1 SV=1 | FLGQNK                                                                                                                                                                                                                                        | 3                                                                                 | 8.9734                                                                                                                                                   | 8.9349                                                                                                                                                   | 1.1139  | 1       | 8.9734  | 8.9734  | 8.9734  |   |   |    |
| KRT90        | HUMAN   | Keratin, type I cuticular H83 OS=Homo sapiens GN=KRT90 PE=1 SV=2  | ETMFLNDR<br>SDELAGVSKLLELLK                                                                                                                                                                                                                   | 2<br>1                                                                            | 3.1326<br>25.8312                                                                                                                                        | 3.1326                                                                                                                                                   | 2       | 14.4818 | 14.4818 | 9.955   | 8.955   |   |   |    |
| KRT91        | HUMAN   | Keratin, type I cuticular H83 OS=Homo sapiens GN=KRT91 PE=1 SV=3  | ETMFLNDR<br>LAAQDF                                                                                                                                                                                                                            | 1<br>1                                                                            | 3.1326<br>0.7208                                                                                                                                         | 3.1326                                                                                                                                                   | 2       | 1.9208  | 1.5248  | 1.5028  | 1.1764  |   |   |    |
| LA_HUMAN     |         | Lupus L protein OS=Homo sapiens GN=SSB PE=1 SV=2                  | EVTVELEGVQR<br>GSFFVADISLQAF<br>LTFDFNVVALSK                                                                                                                                                                                                  | 3<br>1<br>1                                                                       | 5.7806<br>0.9599<br>10.0078                                                                                                                              | 5.7323                                                                                                                                                   | 1.1713  | 3       | 5.8284  | 5.5417  | 2.7485  |   |   |    |
| LAMA4_HUMAN  |         | Laminin subunit alpha-4 OS=Homo sapiens GN=LAMA4 PE=1 SV=3        | AHLRDNFR<br>DAPSPDPAK<br>DEENLNGAR<br>ESMTNHSASQVLEQADMR<br>IFPTDYNRAPPVLEGR<br>LALSIIEGK<br>LSLQDALDNLNWR<br>SLLSDVEELVK<br>TLEPFLVGLDQYWK                                                                                                   | 1<br>1<br>1<br>1<br>1<br>2<br>3<br>3<br>3                                         | 0.3956<br>0.4547<br>0.5248<br>0.5562<br>0.484<br>0.0929<br>2.1779<br>0.4489<br>0.883                                                                     | 0.3956<br>0.4547<br>0.5248<br>0.5562<br>0.484<br>0.0913<br>2.1838<br>0.4483<br>0.4812                                                                    | 9       | 0.6892  | 0.5809  | 0.4628  | 0.4022  |   |   |    |
| LAMB1_HUMAN  |         | Laminin subunit beta-1 OS=Homo sapiens GN=LAMB1 PE=1 SV=1         | EALELEFK<br>ELSDLOFAKLDNYK<br>IEDPYSR<br>KYVDQISR<br>LWVESHQYDVK<br>NFLTQSDALDISEAVANVCK<br>NIGLNFEEK<br>SCACNPLGTPGNCQDSETHGTVCK<br>TLDDLEDK<br>VFSQPVFLQHSADMR<br>VVFVQCEAFSPGISTGPK<br>YDSKPTGTVDF                                         | 1<br>1<br>1<br>1<br>1<br>1<br>1<br>1<br>1<br>1<br>1<br>1<br>1<br>1                | 0.321<br>0.5127<br>21.5888<br>5.5087<br>9.5083<br>2.0551<br>0.4114<br>0.8454<br>0.541<br>0.6928<br>0.5303<br>0.4741                                      | 0.3203<br>0.5103<br>21.5888<br>5.5087<br>9.5083<br>2.0551<br>0.4114<br>0.8353<br>0.541<br>0.6888<br>0.5303<br>0.4741                                     | 13      | 2.5334  | 2.1628  | 0.825   | 0.7554  |   |   |    |
| LAMB2_HUMAN  |         | Laminin subunit beta-2 OS=Homo sapiens GN=LAMB2 PE=1 SV=2         | DIEMK<br>DNIEGFCR<br>EVMDLR<br>KQEAMDMNR<br>LCCSCNDRNVCNDR<br>LGNACSCSSCSFVSLSTODSYGR<br>MEANLQSLV<br>NTEAGNLEAQR<br>ODIVSISYPR<br>SCEIVYSPYLR<br>SNPSCGECPCYR<br>SYVYAFSDYVGR<br>TAEEALR<br>TFVEYTDLNNVNLK<br>TGCCCPGCTGQYGR<br>TLPSCPTNDEPK | 1<br>1<br>2<br>1<br>1<br>1<br>1<br>1<br>1<br>1<br>1<br>1<br>1<br>1<br>1<br>1<br>1 | 0.343<br>2.0712<br>0.439<br>0.8524<br>0.4978<br>0.4238<br>0.5026<br>0.4367<br>0.4017<br>0.4284<br>0.5715<br>0.985<br>1.293<br>0.4378<br>0.8039<br>0.9378 | 0.343<br>2.0712<br>0.439<br>0.8524<br>0.4978<br>0.4238<br>0.5026<br>0.4367<br>0.4017<br>0.4284<br>0.5715<br>0.985<br>1.293<br>0.4378<br>0.8039<br>0.9378 | 16      | 0.7307  | 0.6558  | 0.614   | 0.5738  |   |   |    |
| LAMB3_HUMAN  |         | Laminin subunit beta-3 OS=Homo sapiens GN=LAMB3 PE=1 SV=1         | DIEMK<br>DNIEGFCR<br>EVMDLR<br>KQEAMDMNR<br>LCCSCNDRNVCNDR<br>LGNACSCSSCSFVSLSTODSYGR<br>MEANLQSLV<br>NTEAGNLEAQR<br>ODIVSISYPR<br>SCEIVYSPYLR<br>SNPSCGECPCYR<br>SYVYAFSDYVGR<br>TAEEALR<br>TFVEYTDLNNVNLK<br>TGCCCPGCTGQYGR<br>TLPSCPTNDEPK | 1<br>1<br>2<br>1<br>1<br>1<br>1<br>1<br>1<br>1<br>1<br>1<br>1<br>1<br>1<br>1<br>1 | 0.343<br>2.0712<br>0.439<br>0.8524<br>0.4978<br>0.4238<br>0.5026<br>0.4367<br>0.4017<br>0.4284<br>0.5715<br>0.985<br>1.293<br>0.4378<br>0.8039<br>0.9378 | 0.343<br>2.0712<br>0.439<br>0.8524<br>0.4978<br>0.4238<br>0.5026<br>0.4367<br>0.4017<br>0.4284<br>0.5715<br>0.985<br>1.293<br>0.4378<br>0.8039<br>0.9378 | 16      | 0.7307  | 0.6558  | 0.614   | 0.5738  |   |   |    |
| LAMB4_HUMAN  |         | Laminin subunit beta-4 OS=Homo sapiens GN=LAMB4 PE=2 SV=1         | DIEMK<br>DNIEGFCR<br>EVMDLR<br>KQEAMDMNR<br>LCCSCNDRNVCNDR<br>LGNACSCSSCSFVSLSTODSYGR<br>MEANLQSLV<br>NTEAGNLEAQR<br>ODIVSISYPR<br>SCEIVYSPYLR<br>SNPSCGECPCYR<br>SYVYAFSDYVGR<br>TAEEALR<br>TFVEYTDLNNVNLK<br>TGCCCPGCTGQYGR<br>TLPSCPTNDEPK | 1<br>1<br>2<br>1<br>1<br>1<br>1<br>1<br>1<br>1<br>1<br>1<br>1<br>1<br>1<br>1<br>1 | 0.343<br>2.0712<br>0.439<br>0.8524<br>0.4978<br>0.4238<br>0.5026<br>0.4367<br>0.4017<br>0.4284<br>0.5715<br>0.985<br>1.293<br>0.4378<br>0.8039<br>0.9378 | 0.343<br>2.0712<br>0.439<br>0.8524<br>0.4978<br>0.4238<br>0.5026<br>0.4367<br>0.4017<br>0.4284<br>0.5715<br>0.985<br>1.293<br>0.4378<br>0.8039<br>0.9378 | 16      | 0.7307  | 0.6558  | 0.614   | 0.5738  |   |   |    |
| LAMB5_HUMAN  |         | Laminin subunit beta-5 OS=Homo sapiens GN=LAMB5 PE=1 SV=3         | DIEMK<br>DNIEGFCR<br>EVMDLR<br>KQEAMDMNR<br>LCCSCNDRNVCNDR<br>LGNACSCSSCSFVSLSTODSYGR<br>MEANLQSLV<br>NTEAGNLEAQR<br>ODIVSISYPR<br>SCEIVYSPYLR<br>SNPSCGECPCYR<br>SYVYAFSDYVGR<br>TAEEALR<br>TFVEYTDLNNVNLK<br>TGCCCPGCTGQYGR<br>TLPSCPTNDEPK | 1<br>1<br>2<br>1<br>1<br>1<br>1<br>1<br>1<br>1<br>1<br>1<br>1<br>1<br>1<br>1<br>1 | 0.343<br>2.0712<br>0.439<br>0.8524<br>0.4978<br>0.4238<br>0.5026<br>0.4367<br>0.4017<br>0.4284<br>0.5715<br>0.985<br>1.293<br>0.4378<br>0.8039<br>0.9378 | 0.343<br>2.0712<br>0.439<br>0.8524<br>0.4978<br>0.4238<br>0.5026<br>0.4367<br>0.4017<br>0.4284<br>0.5715<br>0.985<br>1.293<br>0.4378<br>0.8039<br>0.9378 | 16      | 0.7307  | 0.6558  | 0.614   | 0.5738  |   |   |    |
| LAMB6_HUMAN  |         | Laminin subunit beta-6 OS=Homo sapiens GN=LAMB6 PE=1 SV=3         | DIEMK<br>DNIEGFCR<br>EVMDLR<br>KQEAMDMNR<br>LCCSCNDRNVCNDR<br>LGNACSCSSCSFVSLSTODSYGR<br>MEANLQSLV<br>NTEAGNLEAQR<br>ODIVSISYPR<br>SCEIVYSPYLR<br>SNPSCGECPCYR<br>SYVYAFSDYVGR<br>TAEEALR<br>TFVEYTDLNNVNLK<br>TGCCCPGCTGQYGR<br>TLPSCPTNDEPK | 1<br>1<br>2<br>1<br>1<br>1<br>1<br>1<br>1<br>1<br>1<br>1<br>1<br>1<br>1<br>1<br>1 | 0.343<br>2.0712<br>0.439<br>0.8524<br>0.4978<br>0.4238<br>0.5026<br>0.4367<br>0.4017<br>0.4284<br>0.5715<br>0.985<br>1.293<br>0.4378<br>0.8039<br>0.9378 | 0.343<br>2.0712<br>0.439<br>0.8524<br>0.4978<br>0.4238<br>0.5026<br>0.4367<br>0.4017<br>0.4284<br>0.5715<br>0.985<br>1.293<br>0.4378<br>0.8039<br>0.9378 | 16      | 0.7307  | 0.6558  | 0.614   | 0.5738  |   |   |    |
| LAMB7_HUMAN  |         | Laminin subunit beta-7 OS=Homo sapiens GN=LAMB7 PE=1 SV=3         | DIEMK<br>DNIEGFCR<br>EVMDLR<br>KQEAMDMNR<br>LCCSCNDRNVCNDR<br>LGNACSCSSCSFVSLSTODSYGR<br>MEANLQSLV<br>NTEAGNLEAQR<br>ODIVSISYPR<br>SCEIVYSPYLR<br>SNPSCGECPCYR<br>SYVYAFSDYVGR<br>TAEEALR<br>TFVEYTDLNNVNLK<br>TGCCCPGCTGQYGR<br>TLPSCPTNDEPK | 1<br>1<br>2<br>1<br>1<br>1<br>1<br>1<br>1<br>1<br>1<br>1<br>1<br>1<br>1<br>1<br>1 | 0.343<br>2.0712<br>0.439<br>0.8524<br>0.4978<br>0.4238<br>0.5026<br>0.4367<br>0.4017<br>0.4284<br>0.5715<br>0.985<br>1.293<br>0.4378<br>0.8039<br>0.9378 | 0.343<br>2.0712<br>0.439<br>0.8524<br>0.4978<br>0.4238<br>0.5026<br>0.4367<br>0.4017<br>0.4284<br>0.5715<br>0.985<br>1.293<br>0.4378<br>0.8039<br>0.9378 | 16      | 0.7307  | 0.6558  | 0.614   | 0.5738  |   |   |    |
| LAMB8_HUMAN  |         | Laminin subunit beta-8 OS=Homo sapiens GN=LAMB8 PE=1 SV=2         | DIEMK<br>DNIEGFCR<br>EVMDLR<br>KQEAMDMNR<br>LCCSCNDRNVCNDR<br>LGNACSCSSCSFVSLSTODSYGR<br>MEANLQSLV<br>NTEAGNLEAQR<br>ODIVSISYPR<br>SCEIVYSPYLR<br>SNPSCGECPCYR<br>SYVYAFSDYVGR<br>TAEEALR<br>TFVEYTDLNNVNLK<br>TGCCCPGCTGQYGR<br>TLPSCPTNDEPK | 1<br>1<br>2<br>1<br>1<br>1<br>1<br>1<br>1<br>1<br>1<br>1<br>1<br>1<br>1<br>1<br>1 | 0.343<br>2.0712<br>0.439<br>0.8524<br>0.4978<br>0.4238<br>0.5026<br>0.4367<br>0.4017<br>0.4284<br>0.5715<br>0.985<br>1.293<br>0.4378<br>0.8039<br>0.9378 | 0.343<br>2.0712<br>0.439<br>0.8524<br>0.4978<br>0.4238<br>0.5026<br>0.4367<br>0.4017<br>0.4284<br>0.5715<br>0.985<br>1.293<br>0.4378<br>0.8039<br>0.9378 | 16      | 0.7307  | 0.6558  | 0.614   | 0.5738  |   |   |    |
| LAMB9_HUMAN  |         | Laminin subunit beta-9 OS=Homo sapiens GN=LAMB9 PE=1 SV=2         | DIEMK<br>DNIEGFCR<br>EVMDLR<br>KQEAMDMNR<br>LCCSCNDRNVCNDR<br>LGNACSCSSCSFVSLSTODSYGR<br>MEANLQSLV<br>NTEAGNLEAQR<br>ODIVSISYPR<br>SCEIVYSPYLR<br>SNPSCGECPCYR<br>SYVYAFSDYVGR<br>TAEEALR<br>TFVEYTDLNNVNLK<br>TGCCCPGCTGQYGR<br>TLPSCPTNDEPK | 1<br>1<br>2<br>1<br>1<br>1<br>1<br>1<br>1<br>1<br>1<br>1<br>1<br>1<br>1<br>1<br>1 | 0.343<br>2.0712<br>0.439<br>0.8524<br>0.4978<br>0.4238<br>0.5026<br>0.4367<br>0.4017<br>0.4284<br>0.5715<br>0.985<br>1.293<br>0.4378<br>0.8039<br>0.9378 | 0.343<br>2.0712<br>0.439<br>0.8524<br>0.4978<br>0.4238<br>0.5026<br>0.4367<br>0.4017<br>0.4284<br>0.5715<br>0.985<br>1.293<br>0.4378<br>0.8039<br>0.9378 | 16      | 0.7307  | 0.6558  | 0.614   | 0.5738  |   |   |    |
| LAMB10_HUMAN |         | Laminin subunit beta-10 OS=Homo sapiens GN=LAMB10 PE=1 SV=2       | DIEMK<br>DNIEGFCR<br>EVMDLR<br>KQEAMDMNR<br>LCCSCNDRNVCNDR<br>LGNACSCSSCSFVSLSTODSYGR<br>MEANLQSLV<br>NTEAGNLEAQR<br>ODIVSISYPR<br>SCEIVYSPYLR<br>SNPSCGECPCYR<br>SYVYAFSDYVGR<br>TAEEALR<br>TFVEYTDLNNVNLK<br>TGCCCPGCTGQYGR<br>TLPSCPTNDEPK | 1<br>1<br>2<br>1<br>1<br>1<br>1<br>1<br>1<br>1<br>1<br>1<br>1<br>1<br>1<br>1<br>1 | 0.343<br>2.0712<br>0.439<br>0.8524<br>0.4978<br>0.4238<br>0.5026<br>0.4367<br>0.4017<br>0.4284<br>0.5715<br>0.985<br>1.293<br>0.4378<br>0.8039<br>0.9378 | 0.343<br>2.0712<br>0.439<br>0.8524<br>0.4978<br>0.4238<br>0.5026<br>0.4367<br>0.4017<br>0.4284<br>0.5715<br>0.985<br>1.293<br>0.4378<br>0.8039<br>0.9378 | 16      | 0.7307  | 0.6558  | 0.614   | 0.5738  |   |   |    |
| LDHA         | HUMAN   | L-lactate dehydrogenase A chain OS=Homo sapiens GN=LDHA PE=2 SV=1 | WVSGNDLAR                                                                                                                                                                                                                                     | 2                                                                                 | 10.2623                                                                                                                                                  | 10.2238                                                                                                                                                  | 1.1305  | 1       | 10.2623 | 10.2623 | 10.2623 |   |   |    |
| LDBA         | HUMAN   | L-lactate dehydrogenase A chain OS=Homo sapiens GN=LDHA PE=2 SV=1 | WVSGNDLAR                                                                                                                                                                                                                                     | 2                                                                                 | 10.2623                                                                                                                                                  | 10.2238                                                                                                                                                  | 1.1305  | 1       | 10.2623 | 10.2623 | 10.2623 |   |   |    |
| LDBB         | HUMAN   | L-lactate dehydrogenase B chain OS=Homo sapiens GN=LDBB PE=1 SV=2 | GLYRDKDFLVSPVLGNGSDLWK<br>GLTAVYQK<br>ITVVGQVGMACASLGLK<br>LHQDNYVYFANK<br>LMPVAEEVYFNK<br>LKDVEVGLK<br>SAUTLWVQK<br>SLADELAVLDLEK<br>VDSGNDLAR                                                                                               | 1<br>3<br>2<br>1<br>1<br>2<br>2<br>2<br>2                                         | 1.4825<br>6.9217<br>2.8606<br>3.2559<br>4.467<br>8.5986<br>11.0032<br>12.6281<br>11.305                                                                  | 1.4825<br>6.9217<br>2.8219<br>3.2559<br>4.467<br>8.5986<br>11.0032<br>12.6281<br>11.305                                                                  | 9       | 6.7579  | 7.7717  | 5.5088  | 6.4825  |   |   |    |
| LDBE         | HUMAN   | L-lactate dehydrogenase B chain OS=Homo sapiens GN=LDBE PE=1 SV=2 | GEMMIDHSGSLFDTPK<br>GLTAVYQK<br>ITVVGQVGMACASLGLK<br>LHQDNYVYFANK<br>LMPVAEEVYFNK<br>LKDVEVGLK<br>SAUTLWVQK<br>SLADELAVLDLEK<br>VDSGNDLAR                                                                                                     | 1<br>3<br>2<br>1<br>1<br>2<br>2<br>2                                              | 1.4825<br>6.9217<br>2.8606<br>3.2559<br>4.467<br>8.5986<br>11.0032<br>12.6281<br>11.305                                                                  | 1.4825<br>6.9217<br>2.8219<br>3.2559<br>4.467<br>8.5986<br>11.0032<br>12.6281<br>11.305                                                                  | 9       | 6.7579  | 7.7717  | 5.5088  | 6.4825  |   |   |    |
| LDHC         | HUMAN   | L-lactate dehydrogenase C chain OS=Homo sapiens GN=LDHC PE=2 SV=4 | GALCTD1R<br>DHNLHLNPNR<br>FNAHDANTVCNK<br>GEPWADK<br>LNLEANNMAQDQFK<br>SPFNVLK                                                                                                                                                                | 3<br>1<br>1<br>1<br>1<br>4                                                        | 8.4332<br>5.7319<br>5.904<br>3.1744<br>3.8919<br>8.5871                                                                                                  | 8.4339<br>5.7319<br>5.7258<br>2.5284<br>3.1749<br>8.5873                                                                                                 | 1.0586  | 6       | 5.1686  | 4.9833  | 5.0056  |   |   |    |
| LDHA         | HUMAN   | L-lactate dehydrogenase A chain OS=Homo sapiens GN=LDHA PE=2 SV=1 | WVSGNDLAR                                                                                                                                                                                                                                     | 2                                                                                 | 10.2623                                                                                                                                                  | 10.2238                                                                                                                                                  | 1.1305  | 1       | 10.2623 | 10.2623 | 10.2623 |   |   |    |
| LDHB         | HUMAN   | L-lactate dehydrogenase B chain OS=Homo sapiens GN=LDBB PE=1 SV=2 | GEMMIDHSGSLFDTPK<br>GLTAVYQK<br>ITVVGQVGMACASLGLK<br>LHQDNYVYFANK<br>LMPVAEEVYFNK<br>LKDVEVGLK<br>SAUTLWVQK<br>SLADELAVLDLEK<br>VDSGNDLAR                                                                                                     | 1<br>3<br>2<br>1<br>1<br>2<br>2<br>2                                              | 1.4825<br>6.9217<br>2.8606<br>3.2559<br>4.467<br>8.5986<br>11.0032<br>12.6281<br>11.305                                                                  | 1.4825<br>6.9217<br>2.8219<br>3.2559<br>4.467<br>8.5986<br>11.0032<br>12.6281<br>11.305                                                                  | 9       | 6.7579  | 7.7717  | 5.5088  | 6.4825  |   |   |    |
| LDHE         | HUMAN   | L-lactate dehydrogenase E chain OS=Homo sapiens GN=LDHE PE=1 SV=1 | MULTIDKRWANR<br>ELSEALGFDSOR<br>GGWGTVCNDVNDVSDVCCR<br>LASQVGR<br>SLGWLK<br>STSSRFPQGFNGFDR<br>TQALEHTVFPQDALAR<br>YSSDFPAPSDR                                                                                                                | 1<br>1<br>1<br>1<br>1<br>1<br>1<br>1                                              | 0.8674<br>0.8846<br>1.3884<br>0.628<br>0.0901<br>8.3061<br>2.0912<br>1.8944                                                                              | 0.8674<br>0.8846<br>1.3884<br>0.628<br>0.0901<br>8.3061<br>2.0912<br>1.8944                                                                              | 1       | 1.9944  | 1.9944  | 1.9944  | 1.9944  |   |   |    |
| LDHG         | HUMAN   | L-lactate dehydrogenase H chain OS=Homo sapiens GN=LDHG PE=1 SV=1 | GLRQGGDQWVWLNPVK<br>SISLSIPR                                                                                                                                                                                                                  | 1<br>1                                                                            | 2.4357<br>0.1637                                                                                                                                         | 2.4357                                                                                                                                                   | 1       | 2.4357  | 2.4357  | 2.4357  | 2.4357  |   |   |    |
| LDHM         | HUMAN   | Lumican OS=Homo sapiens GN=LDHM PE=1 SV=1                         | LAQALFW<br>LTYAVLSVQK                                                                                                                                                                                                                         | 1<br>1                                                                            | 3.0653<br>0.4028                                                                                                                                         | 3.0653                                                                                                                                                   | 2       | 1.7341  | 1.7341  | 1.1112  | 1.1112  |   |   |    |
| LDHL         | HUMAN   | Lumican OS=Homo sapiens GN=LDHL PE=1 SV=1                         | LAQALFW<br>LTYAVLSVQK                                                                                                                                                                                                                         | 1<br>1                                                                            | 3.0653<br>0.4028                                                                                                                                         | 3.0653                                                                                                                                                   | 2       | 1.7341  | 1.7341  | 1.1112  | 1.1112  |   |   |    |
| LDLN         | HUMAN   | Lumican OS=Homo sapiens GN=LDLN PE=1 SV=1                         | LAQALFW<br>LTYAVLSVQK                                                                                                                                                                                                                         | 1<br>1                                                                            | 3.0653<br>0.4028                                                                                                                                         | 3.0653                                                                                                                                                   | 2       | 1.7341  | 1.7341  | 1.1112  | 1.1112  |   |   |    |
| LDLN         | HUMAN   | Lumican OS=Homo sapiens GN=LDLN PE=1 SV=1                         | LAQALFW<br>LTYAVLSVQK                                                                                                                                                                                                                         | 1<br>1                                                                            | 3.0653<br>0.4028                                                                                                                                         | 3.0653                                                                                                                                                   | 2       | 1.7341  | 1.7341  | 1.1112  | 1.1112  |   |   |    |
| LDLN         | HUMAN   | Lumican OS=Homo sapiens GN=LDLN PE=1 SV=1                         | LAQALFW<br>LTYAVLSVQK                                                                                                                                                                                                                         | 1<br>1                                                                            | 3.0653<br>0.4028                                                                                                                                         | 3.0653                                                                                                                                                   | 2       | 1.7341  | 1.7341  | 1.1112  | 1.1112  |   |   |    |
| LDLN         | HUMAN   | Lumican OS=Homo sapiens GN=LDLN PE=1 SV=1                         | LAQALFW<br>LTYAVLSVQK                                                                                                                                                                                                                         | 1<br>1                                                                            | 3.0653<br>0.4028                                                                                                                                         |                                                                                                                                                          |         |         |         |         |         |   |   |    |



|                     |                                                                                                                              |                          |   |         |         |        |         |         |         |         |         |         |         |         |        |
|---------------------|------------------------------------------------------------------------------------------------------------------------------|--------------------------|---|---------|---------|--------|---------|---------|---------|---------|---------|---------|---------|---------|--------|
|                     |                                                                                                                              | GMSNLGK                  | 3 | 3.2824  | 3.2823  | 1.0109 |         |         |         |         |         |         |         |         |        |
|                     |                                                                                                                              | IEVNESDTHVSSISYAWSHR     | 2 | 2.2878  | 2.2864  | 1.0656 |         |         |         |         |         |         |         |         |        |
|                     |                                                                                                                              | KPLENGMTDMFR             | 1 | 2.5528  | 2.5528  |        |         |         |         |         |         |         |         |         |        |
|                     |                                                                                                                              | LLVLPK                   | 1 | 4.5768  | 4.5768  |        |         |         |         |         |         |         |         |         |        |
|                     |                                                                                                                              | LVLVLAIVRYSDQVK          | 2 | 2.8414  | 2.8298  | 1.1556 |         |         |         |         |         |         |         |         |        |
|                     |                                                                                                                              | LVOGFMPHFVK              | 1 | 3.7843  | 3.7843  |        |         |         |         |         |         |         |         |         |        |
|                     |                                                                                                                              | QFQADFTLSLSDGEPHVAQDQK   | 3 | 2.187   | 2.2938  | 1.4333 |         |         |         |         |         |         |         |         |        |
|                     |                                                                                                                              | QYDFSEVER                | 5 | 3.7428  | 3.733   | 1.0849 |         |         |         |         |         |         |         |         |        |
|                     |                                                                                                                              | SDGSTVSVPMMAQTK          | 2 | 3.6622  | 3.6605  | 1.0443 |         |         |         |         |         |         |         |         |        |
|                     |                                                                                                                              | VFGQADQK                 | 4 | 3.2083  | 3.175   | 1.2438 |         |         |         |         |         |         |         |         |        |
| <b>PAIRB_HUMAN</b>  | <b>Plasminogen activator inhibitor 1 RNA-binding protein OS=Homo sapiens GN=SERP1 PE=1 SV=1</b>                              | EMTLDEVK                 | 1 | 6.0861  | 6.0861  | 6.0861 | 6.0861  | 6.0861  | 6.0861  |         |         |         |         |         |        |
| <b>PAL4B_HUMAN</b>  | <b>Peptidylprolyl cis-trans isomerase A-like 4B OS=Homo sapiens GN=PPAL4B PE=1 SV=1</b>                                      | IHPGMGGQGFTR             | 1 | 19.2145 | 19.2145 | 2      | 18.4965 | 18.4965 | 18.4928 | 18.4826 | 18.4826 | 1.0066  |         |         |        |
|                     |                                                                                                                              | SVYSEK                   | 1 | 17.7765 | 17.7765 |        |         |         |         |         |         |         |         |         |        |
| <b>PARK7_HUMAN</b>  | <b>Protein DJ-1 OS=Homo sapiens GN=PARK7 PE=1 SV=2</b>                                                                       | ALVILAK                  | 2 | 0.0787  | 0.0785  | 1.1161 | 2       | 1.4772  | 1.011   | 0.4757  | 0.2612  | 0.2607  | 12.736  |         |        |
|                     |                                                                                                                              | GLIAACACAPGTRFLVGEFSGSK  | 1 | 2.8726  | 2.8726  |        |         |         |         |         |         |         |         |         |        |
|                     |                                                                                                                              | SDAYVYGVSYFAWTK          | 1 | 0.4253  | 0.4253  | 1      | 0.4253  | 0.4253  | 0.4253  | 0.4253  | 0.4253  |         |         |         |        |
| <b>PARP1_HUMAN</b>  | <b>Poly (ADP-ribose) polymerase 1 OS=Homo sapiens GN=PARP1 PE=1 SV=4</b>                                                     | ITLTGTPFNATK             | 2 | 0.3501  | 0.3522  | 2.1938 | 1       | 0.3501  | 0.3501  | 0.3501  | 0.3501  | 0.3502  |         |         |        |
| <b>PCBP1_HUMAN</b>  | <b>Poly(C)-binding protein 1 OS=Homo sapiens GN=PCBP1 PE=1 SV=2</b>                                                          | ITLTKLQDGLPLPSAK         | 1 | 4.256   | 4.256   |        |         |         |         |         |         |         |         |         |        |
| <b>PDI2_HUMAN</b>   | <b>Protein disulfide-isomerase 2 OS=Homo sapiens GN=PDI2 PE=1 SV=1</b>                                                       | AEDNADLAVFAPVQEK         | 1 | 2.256   | 2.255   | 3      | 2.255   | 2.255   | 1.025   | 1.025   | 1.025   | 9.315   |         |         |        |
|                     |                                                                                                                              | DLSHGDVAVSSCAK           | 1 | 3.242   | 3.242   |        |         |         |         |         |         |         |         |         |        |
|                     |                                                                                                                              | NLHWGLTSMQK              | 1 | 0.0784  | 0.0784  |        |         |         |         |         |         |         |         |         |        |
| <b>PDCD1_HUMAN</b>  | <b>Procollagen C-endopeptidase enhancer 1 OS=Homo sapiens GN=PDCDCE PE=1 SV=2</b>                                            | ATSGTEHFQCGR             | 1 | 2.0387  | 2.0387  | 8      | 0.7275  | 0.7633  | 0.4314  | 0.4478  | 0.4441  | 3.2045  |         |         |        |
|                     |                                                                                                                              | EPEGLAVTSLVGLYAK         | 1 | 0.2956  | 0.2956  |        |         |         |         |         |         |         |         |         |        |
|                     |                                                                                                                              | FDLEPQYR                 | 1 | 0.0905  | 0.0905  |        |         |         |         |         |         |         |         |         |        |
|                     |                                                                                                                              | GESGYVASEGFFNLYPNK       | 2 | 0.1248  | 0.1214  | 1.3919 |         |         |         |         |         |         |         |         |        |
|                     |                                                                                                                              | GFLLFYGR                 | 1 | 0.351   | 0.351   |        |         |         |         |         |         |         |         |         |        |
|                     |                                                                                                                              | TEEFSAPADPTCPK           | 2 | 0.1901  | 0.1857  | 1.3601 |         |         |         |         |         |         |         |         |        |
|                     |                                                                                                                              | YDALEVFAAGSTSGOR         | 3 | 1.5123  | 1.5121  | 1.0192 |         |         |         |         |         |         |         |         |        |
|                     |                                                                                                                              | YSSVYVGVAGSSQGR          | 1 | 0.817   | 0.817   |        |         |         |         |         |         |         |         |         |        |
| <b>PCDC2_HUMAN</b>  | <b>Programmed cell death 6-interacting protein OS=Homo sapiens GN=PCDC6 PE=1 SV=1</b>                                        | LANQADYFGDQK             | 1 | 2.7071  | 2.7071  |        |         |         | 2.40161 | 4.0161  | 3.7568  | 3.7968  | 3.7968  | 1.6135  |        |
|                     |                                                                                                                              | SVAGGGSTLVQDVK           | 1 | 5.3251  | 5.3251  |        |         |         |         |         |         |         |         |         |        |
| <b>PCDB8_HUMAN</b>  | <b>Programmed cell death protein 6 OS=Homo sapiens GN=PCDB8 PE=1 SV=1</b>                                                    | AGVSPSELTIVQK            | 2 | 22.2424 | 22.2424 | 1      | 22.2424 | 22.2424 | 22.2424 | 22.2424 | 22.2424 | 22.2424 | 22.2424 | 22.2424 |        |
| <b>PEDE8_HUMAN</b>  | <b>High affinity cAMP-specific and IBMX-insensitive 3',5'-cyclic phosphodiesterase 8B OS=Homo sapiens GN=PEDE8 PE=1 SV=2</b> | TDLQK                    | 1 | 0.649   | 0.649   |        |         |         | 0.649   | 0.649   | 0.649   | 0.649   |         |         |        |
| <b>PDIAT1_HUMAN</b> | <b>Protein disulfide-isomerase OS=Homo sapiens GN=PDI1 PE=1 SV=3</b>                                                         | EADDVWVLK                | 1 | 10.247  | 10.247  |        |         |         | 6.652   | 5.4537  | 5.669   | 4.5751  | 4.5687  | 2.352   |        |
|                     |                                                                                                                              | ENLVDFPK                 | 2 | 3.0771  | 3.0771  | 1.0961 |         |         |         |         |         |         |         |         |        |
| <b>PDI3A_HUMAN</b>  | <b>Protein disulfide-isomerase A3 OS=Homo sapiens GN=PDI3A PE=1 SV=4</b>                                                     | DASIVFGPDFSSEAHEFLK      | 1 | 2.6303  | 2.6303  |        |         |         | 3.0183  | 3.0183  | 2.9533  | 2.9533  | 2.9533  | 1.2006  |        |
|                     |                                                                                                                              | GFPTTSPFNK               | 1 | 1.6653  | 1.6653  |        |         |         |         |         |         |         |         |         |        |
|                     |                                                                                                                              | DFNMAPLTK                | 1 | 4.0144  | 4.0144  |        |         |         | 3.4538  | 2.4538  | 2.1161  | 2.1141  | 2.1141  | 2.2008  |        |
|                     |                                                                                                                              | IGDVLVSDIQAQMTLEAQNK     | 1 | 2.3419  | 2.3419  |        |         |         |         |         |         |         |         |         |        |
|                     |                                                                                                                              | NVMAVGFQVSK              | 1 | 1.0051  | 1.0051  |        |         |         |         |         |         |         |         |         |        |
| <b>PDI5_HUMAN</b>   | <b>PDZ and LIM domain protein 5 OS=Homo sapiens GN=PDI5 PE=1 SV=4</b>                                                        | APWAVTGYAIEDVDVQK        | 1 | 8.1261  | 8.1261  | 3      | 4.5206  | 4.5206  | 3.1048  | 3.1048  | 3.1048  | 3.1048  | 3.1048  | 3.9679  |        |
|                     |                                                                                                                              | LYEYVGLQK                | 1 | 4.6424  | 4.6424  |        |         |         |         |         |         |         |         |         |        |
|                     |                                                                                                                              | NEPTTSVWGLDQSK           | 1 | 0.7034  | 0.7034  |        |         |         |         |         |         |         |         |         |        |
| <b>PEBP1_HUMAN</b>  | <b>Phosphatidylethanolamine-binding protein 1 OS=Homo sapiens GN=PEBP1 PE=1 SV=3</b>                                         | ALVYLVSSDPDHGTYK         | 1 | 0.1245  | 0.1245  |        |         |         | 0.3129  | 0.3004  | 0.2661  | 0.2527  | 0.2339  | 1.843   |        |
|                     |                                                                                                                              | DTDTGLLAFQK              | 2 | 0.288   | 0.2876  | 1.0725 |         |         |         |         |         |         |         |         |        |
|                     |                                                                                                                              | EPIEDSLLQVANIYK          | 1 | 0.4551  | 0.4551  |        |         |         |         |         |         |         |         |         |        |
|                     |                                                                                                                              | ELUDTYAPQK               | 1 | 0.1233  | 0.1233  |        |         |         |         |         |         |         |         |         |        |
|                     |                                                                                                                              | LAANAIVGVGVYR            | 2 | 0.6853  | 0.4216  | 4.2043 |         |         |         |         |         |         |         |         |        |
|                     |                                                                                                                              | LDLQENNVWQAGAK           | 1 | 0.4989  | 0.4989  |        |         |         |         |         |         |         |         |         |        |
|                     |                                                                                                                              | LQSLVSPQSK               | 4 | 0.1543  | 0.1472  | 1.4335 |         |         |         |         |         |         |         |         |        |
|                     |                                                                                                                              | TSLEDFNLDER              | 1 | 0.2296  | 0.2296  |        |         |         |         |         |         |         |         |         |        |
|                     |                                                                                                                              | YGLDSLQSK                | 1 | 0.2942  | 0.2942  |        |         |         |         |         |         |         |         |         |        |
| <b>PER1_HUMAN</b>   | <b>Peripherin OS=Homo sapiens GN=PRPH PE=1 SV=2</b>                                                                          | KLEEGSER                 | 1 | 11.2815 | 11.2815 |        |         |         | 11.1362 | 10.184  | 9.8431  | 8.776   | 7.5424  | 18.718  |        |
|                     |                                                                                                                              | LEEETR                   | 1 | 17.0976 | 17.0976 |        |         |         |         |         |         |         |         |         |        |
|                     |                                                                                                                              | LEEESER                  | 2 | 12.1651 | 12.1517 | 1.0685 |         |         |         |         |         |         |         |         |        |
|                     |                                                                                                                              | MALDGLIYR                | 2 | 4.2006  | 4.2424  | 4.2841 |         |         |         |         |         |         |         |         |        |
| <b>PGAM1_HUMAN</b>  | <b>Phosphoglycerate mutase 1 OS=Homo sapiens GN=PGAM1 PE=1 SV=2</b>                                                          | ALPYNVEVPQK              | 2 | 8.8121  | 8.8115  | 1.0155 | 2       | 9.3541  | 9.3541  | 9.3429  | 9.3429  | 8.9447  | 1.0717  |         |        |
|                     |                                                                                                                              | YALDELEPSEESK            | 2 | 8.862   | 8.154   | 1.8187 |         |         |         |         |         |         |         |         |        |
| <b>PGAM2_HUMAN</b>  | <b>Phosphoglycerate mutase 2 OS=Homo sapiens GN=PGAM2 PE=1 SV=3</b>                                                          | ALPYNVEVPQK              | 2 | 8.8121  | 8.8115  | 1.0155 | 1       | 8.8121  | 8.8121  | 8.812   | 8.812   | 8.812   | 8.812   | 8.812   |        |
| <b>PGAM3_HUMAN</b>  | <b>Probable phosphoglycerate mutase 4 OS=Homo sapiens GN=PGAM3 PE=1 SV=1</b>                                                 | ALPYNVEVPQK              | 1 | 8.7051  | 8.7051  |        |         |         | 8.7051  | 8.7051  | 8.7051  | 8.7051  | 8.7051  | 8.7051  |        |
| <b>PGM3_HUMAN</b>   | <b>Basement membrane-specific heparan sulfate proteoglycan core protein OS=Homo sapiens GN=HSPG2 PE=1 SV=3</b>               | AGVPSGATVWR              | 1 | 5.295   | 5.295   |        |         |         | 27      | 5.8441  | 5.726   | 4.1726  | 4.4281  | 4.3099  | 2.8488 |
|                     |                                                                                                                              | AGFGFAK                  | 1 | 3.5438  | 3.5438  |        |         |         |         |         |         |         |         |         |        |
|                     |                                                                                                                              | AMDFNGLTR                | 1 | 0.4783  | 0.4783  |        |         |         |         |         |         |         |         |         |        |
|                     |                                                                                                                              | CATYAGSPATHHWK           | 1 | 2.3973  | 2.3973  |        |         |         |         |         |         |         |         |         |        |
|                     |                                                                                                                              | ESDQGYCEAMNAR            | 1 | 6.1165  | 6.1165  |        |         |         |         |         |         |         |         |         |        |
|                     |                                                                                                                              | EVSEAVNLTSEYLK           | 4 | 5.1785  | 4.835   | 1.7354 |         |         |         |         |         |         |         |         |        |
|                     |                                                                                                                              | FDQQPK                   | 1 | 4.8325  | 4.8325  | 1.0999 |         |         |         |         |         |         |         |         |        |
|                     |                                                                                                                              | FSRGTGQVK                | 2 | 8.3252  | 8.3253  | 1.14   |         |         |         |         |         |         |         |         |        |
|                     |                                                                                                                              | GVQSEVYQVK               | 1 | 3.6728  | 3.6728  |        |         |         |         |         |         |         |         |         |        |
|                     |                                                                                                                              | GPSQDDGTGYR              | 1 | 7.5061  | 7.5061  |        |         |         |         |         |         |         |         |         |        |
|                     |                                                                                                                              | LDEVFKLADGVLLSFGSK       | 2 | 8.212   | 8.1882  | 1.132  |         |         |         |         |         |         |         |         |        |
|                     |                                                                                                                              | LEKDTLPR                 | 3 | 5.2867  | 4.4781  | 5.2867 |         |         |         |         |         |         |         |         |        |
|                     |                                                                                                                              | LHHVSPDQSGVEYR           | 1 | 5.0425  | 5.0425  |        |         |         |         |         |         |         |         |         |        |
|                     |                                                                                                                              | LHWGSPDQSGVEYR           | 1 | 4.2419  | 4.2419  | 2.1445 |         |         |         |         |         |         |         |         |        |
|                     |                                                                                                                              | LLSGYPFWLSPSR            | 1 | 2.451   | 2.451   |        |         |         |         |         |         |         |         |         |        |
|                     |                                                                                                                              | LYDASPDQSGVEYR           | 1 | 5.0728  | 5.0728  |        |         |         |         |         |         |         |         |         |        |
|                     |                                                                                                                              | QFMATVYK                 | 1 | 6.1304  | 6.1304  |        |         |         |         |         |         |         |         |         |        |
|                     |                                                                                                                              | SGPVEVLSVAMVGGHLEFR      | 1 | 3.13    | 3.13    |        |         |         |         |         |         |         |         |         |        |
|                     |                                                                                                                              | SIGASVEVNDLPSR           | 1 | 6.6775  | 6.6775  |        |         |         |         |         |         |         |         |         |        |
|                     |                                                                                                                              | SVVPGQSHLR               | 1 | 4.6547  | 4.6547  |        |         |         |         |         |         |         |         |         |        |
|                     |                                                                                                                              | SPAVTLLVTR               | 2 | 8.1943  | 8.1836  | 1.0688 |         |         |         |         |         |         |         |         |        |
|                     |                                                                                                                              | SPVSPSPSTVQDQDAQSK       | 1 | 3.6314  | 3.6255  | 1.094  |         |         |         |         |         |         |         |         |        |
|                     |                                                                                                                              | SSVPRGADVFTFCTAK         | 1 | 4.9605  | 4.9605  |        |         |         |         |         |         |         |         |         |        |
|                     |                                                                                                                              | TGCAVDFK                 | 1 | 3.1078  | 3.1078  |        |         |         |         |         |         |         |         |         |        |
|                     |                                                                                                                              | TSTASGLLWQVEVGEAGQK      | 1 | 3.477   | 3.477   |        |         |         |         |         |         |         |         |         |        |
|                     |                                                                                                                              | VAEQGLDLK                | 1 | 0.3462  | 0.3462  |        |         |         |         |         |         |         |         |         |        |
|                     |                                                                                                                              | VLDVGEVYR                | 1 | 44.5026 | 44.5026 |        |         |         |         |         |         |         |         |         |        |
| <b>PGK1_HUMAN</b>   | <b>Phosphoglycerate kinase 1 OS=Homo sapiens GN=PGK1 PE=1 SV=3</b>                                                           | ALMDEVK                  | 3 | 1.0073  | 0.2668  | 7.8011 | 8       | 5.8247  | 4.6212  | 4.4553  | 3.3093  | 2.215   | 2.1514  |         |        |
|                     |                                                                                                                              | DYCPYEEK                 | 1 | 2.7664  | 2.7664  |        |         |         |         |         |         |         |         |         |        |
|                     |                                                                                                                              | FHVEEKG                  | 1 | 6.1528  | 6.1528  |        |         |         |         |         |         |         |         |         |        |
|                     |                                                                                                                              | GGTITGGDTATCCAK          | 1 | 12.664  | 12.664  |        |         |         |         |         |         |         |         |         |        |
|                     |                                                                                                                              | ITLVQVYQAK               | 1 | 5.959   | 5.959   |        |         |         |         |         |         |         |         |         |        |
|                     |                                                                                                                              | ITLVDVTDADFDENAK         | 1 | 3.1109  | 3.1109  |        |         |         |         |         |         |         |         |         |        |
|                     |                                                                                                                              | TGQAVVAGSGPHQWVQDQSPSSSK | 1 | 5.8216  | 5.8216  |        |         |         |         |         |         |         |         |         |        |
|                     |                                                                                                                              | VLNMNMTSLFDEEAK          | 1 | 7.0355  | 7.0355  |        |         |         |         |         |         |         |         |         |        |
| <b>PGK2_HUMAN</b>   | <b>Phosphoglycerate kinase 2 OS=Homo sapiens GN=PGK2 PE=1 SV=3</b>                                                           | PHVEEKG                  | 1 | 6.1528  | 6.1528  |        |         |         | 1       | 6.1528  | 6.1528  | 6.1528  | 6.1528  | 6.1528  |        |
| <b>PGS1_HUMAN</b>   | <b>Bitycin OS=Homo sapiens GN=PGS1 PE=1 SV=2</b>                                                                             | ESIPOTTLDLVNNSDEK        | 1 | 1.4493  | 1.4493  | 4      | 1.8151  | 1.8845  | 1.0678  | 1.2296  | 1.2293  | 4.5828  |         |         |        |
|                     |                                                                                                                              | ELHLDNK                  | 1 | 0.1175  | 0.1175  |        |         |         |         |         |         |         |         |         |        |
|                     |                                                                                                                              | IQMIELEDLR               | 2 | 2.1622  | 2.1606  | 1.0556 |         |         |         |         |         |         |         |         |        |
|                     |                                                                                                                              | VQVNSFCMDFGK             | 1 | 3.5313  | 3.5313  |        |         |         |         |         |         |         |         |         |        |
| <b>PGS2_HUMAN</b>   | <b>Decom OS=Homo sapiens GN=DCN PE=1 SV=1</b>                                                                                | AHENETK                  | 1 | 0.245   | 0.245   | 12     | 1.3676  | 1.4045  | 0.2815  | 0.2362  | 0.1988  | 5.1871  |         |         |        |
|                     |                                                                                                                              | ASVSGVLSVPHVHEGSPSTR     | 1 | 2.8589  | 2.8589  |        |         |         |         |         |         |         |         |         |        |
|                     |                                                                                                                              | DEPSSLGVPVCFR            | 2 | 10.928  | 7.1432  | 4.0478 |         |         |         |         |         |         |         |         |        |
|                     |                                                                                                                              | DLPRPITLIDLVNNK          | 2 | 0.0981  | 0.0958  | 1.5314 |         |         |         |         |         |         |         |         |        |
|                     |                                                                                                                              | ELHLDNK                  | 1 | 0.1175  | 0.1175  |        |         |         |         |         |         |         |         |         |        |
|                     |                                                                                                                              | GLNLNAK                  | 3 | 0.1101  | 0.0888  | 2.4458 |         |         |         |         |         |         |         |         |        |
|                     |                                                                                                                              | NLHALLNNK                | 1 | 1.2404  | 1.2404  |        |         |         |         |         |         |         |         |         |        |
|                     |                                                                                                                              | SSNGAGVQCMK              | 3 | 0.095   | 0.0739  | 2.3841 |         |         |         |         |         |         |         |         |        |
|                     |                                                                                                                              | VSRGAFPLVYK              | 2 | 0.0535  | 0.0528  | 1.288  |         |         |         |         |         |         |         |         |        |
|                     |                                                                                                                              | VTFKLVNCKVLEITLNPK       | 1 | 9.2767  | 9.2767  |        |         |         |         |         |         |         |         |         |        |
|                     |                                                                                                                              | VWCCSLGDLK               | 2 | 0.1887  | 0.1098  | 4.9939 |         |         |         |         |         |         |         |         |        |
|                     |                                                                                                                              | WVCCSLGDLVQK             | 1 | 0.743   | 0.743   |        |         |         |         |         |         |         |         |         |        |
| <b>PHP14_HUMAN</b>  | <b>14-3-3 phosphohistidine phosphatase OS=Homo sapiens GN=PHP1 PE=1 SV=1</b>                                                 | AKYVDVYTVNANDYV          | 1 | 6.3556  | 6.3556  |        |         |         | 6.3556  | 6.3556  | 6.3556  | 6.3556  | 6.3556  | 6.3556  |        |
| <b>PMT_HUMAN</b>    | <b>Protein L-isoaspartate(D-aspartate) O-methyltransferase OS=Homo sapiens GN=PCMT1 PE=1 SV=3</b>                            | VIGWIDK                  | 1 | 1.7446  | 1.7446  |        |         | </      |         |         |         |         |         |         |        |

| Gene         | Protein                                                                                                | OS-Homo sapiens | Protein | OS-Homo sapiens | Protein | OS-Homo sapiens | Protein | OS-Homo sapiens | Protein | OS-Homo sapiens |
|--------------|--------------------------------------------------------------------------------------------------------|-----------------|---------|-----------------|---------|-----------------|---------|-----------------|---------|-----------------|
| PRPM1_HUMAN  | Protein phosphatase 1F OS-Homo sapiens GN=PRPM1F PE1 SV=3                                              | 4               | 14 2138 | 12 552          | 19 132  | 1               | 3 3009  | 3 3009          | 3 3009  | 3 3009          |
| PRDX1_HUMAN  | Peroxidase-1 OS-Homo sapiens GN=PRDX1 PE1 SV=1                                                         | 1               | 37 1007 | 10 500          | 1       | 10 6477         | 10 607  | 10 6477         | 10 607  | 10 6477         |
| PRDX2_HUMAN  | Peroxidase-2 OS-Homo sapiens GN=PRDX2 PE1 SV=5                                                         | 1               | 7 9093  | 7 9093          | 1       | 7 9093          | 7 9093  | 7 9093          | 7 9093  | 7 9093          |
| PRDX3_HUMAN  | Peroxidase-3 OS-Homo sapiens GN=PRDX3 PE1 SV=3                                                         | 1               | 3 5093  | 3 5093          | 1 0681  | 1               | 3 5093  | 3 5093          | 3 5092  | 3 5092          |
| PRDX4_HUMAN  | Peroxidase-4 OS-Homo sapiens GN=PRDX4 PE1 SV=1                                                         | 1               | 10 9172 | 10 9172         | 1 1337  | 3               | 10 9647 | 9 818           | 9 8263  | 9 844           |
| PRDX5_HUMAN  | Peroxidase-5, mitochondrial OS-Homo sapiens GN=PRDX5 PE1 SV=3                                          | 1               | 5 1145  | 5 1145          | 145     | 2               | 6 8991  | 3 6991          | 3 4176  | 3 4176          |
| PRDX6_HUMAN  | Peroxidase-6 OS-Homo sapiens GN=PRDX6 PE1 SV=3                                                         | 1               | 2 2837  | 2 2837          | 1       | 5 2942          | 2 942   | 1 7893          | 1 7893  | 1 7893          |
| PREL_HUMAN   | Prelinin OS-Homo sapiens GN=PREL PE1 SV=1                                                              | 1               | 1 2938  | 1 2938          | 1       | 1 2938          | 1 2938  | 1 2938          | 1 2938  | 1 2938          |
| PRPF_HUMAN   | Presequence protease, mitochondrial OS-Homo sapiens GN=PRPF1 PE1 SV=2                                  | 1               | 1 1599  | 1 1599          | 1       | 1 1599          | 1 1599  | 1 1599          | 1 1599  | 1 1599          |
| PROPL_HUMAN  | Profilin-1 OS-Homo sapiens GN=PROPL PE1 SV=2                                                           | 1               | 6 5686  | 6 5686          | 7       | 9 2496          | 9 1365  | 8 89            | 8 8732  | 8 933           |
| PRSD1_HUMAN  | 26S protease regulatory subunit S10B OS-Homo sapiens GN=PRSD1 PE1 SV=1                                 | 1               | 1 4518  | 1 4518          | 1       | 4 5108          | 4 5108  | 4 5108          | 4 5108  | 4 5108          |
| PRSD2_HUMAN  | Serine protease 23 OS-Homo sapiens GN=PRSD2 PE1 SV=1                                                   | 1               | 1 1186  | 1 1186          | 2       | 2 0411          | 2 0411  | 0 6856          | 0 6856  | 0 6856          |
| PSA_HUMAN    | Prostate-specific antigen OS-Homo sapiens GN=PSA PE1 SV=2                                              | 1               | 0 0121  | 0 0121          | 2       | 0 8622          | 0 8622  | 0 1439          | 0 1439  | 0 1439          |
| PSA2_HUMAN   | Proteasome subunit alpha type-2 OS-Homo sapiens GN=PSA2 PE1 SV=2                                       | 1               | 4 8071  | 4 8071          | 2       | 4 9682          | 4 9682  | 4 6033          | 4 6033  | 4 6033          |
| PSA3_HUMAN   | Proteasome subunit alpha type-3 OS-Homo sapiens GN=PSA3 PE1 SV=2                                       | 1               | 18 4288 | 18 4288         | 1       | 18 4288         | 18 4288 | 18 4288         | 18 4288 | 18 4288         |
| PSA4_HUMAN   | Proteasome subunit alpha type-4 OS-Homo sapiens GN=PSA4 PE1 SV=3                                       | 1               | 2 8489  | 2 8489          | 2       | 6 1653          | 6 1653  | 4 6167          | 4 6167  | 4 6167          |
| PSA6_HUMAN   | Proteasome subunit alpha type-6 OS-Homo sapiens GN=PSA6 PE1 SV=1                                       | 1               | 2 4816  | 2 4816          | 3       | 1 579           | 1 579   | 0 4622          | 0 4622  | 0 4622          |
| PSA7_HUMAN   | Proteasome subunit alpha type-7 OS-Homo sapiens GN=PSA7 PE1 SV=1                                       | 1               | 1 9735  | 1 9735          | 1       | 1 9735          | 1 9735  | 1 9735          | 1 9735  | 1 9735          |
| PSA8_HUMAN   | Proteasome subunit alpha type-8 OS-Homo sapiens GN=PSA8 PE1 SV=3                                       | 1               | 1 9735  | 1 9735          | 1       | 1 9735          | 1 9735  | 1 9735          | 1 9735  | 1 9735          |
| PSM1_HUMAN   | Proteinase-1 OS-Homo sapiens GN=PSM1 PE1 SV=2                                                          | 1               | 1 0121  | 1 0121          | 1       | 1 0121          | 1 0121  | 1 0121          | 1 0121  | 1 0121          |
| PSM2_HUMAN   | Proteinase-2 OS-Homo sapiens GN=PSM2 PE1 SV=1                                                          | 1               | 1 0121  | 1 0121          | 1       | 1 0121          | 1 0121  | 1 0121          | 1 0121  | 1 0121          |
| PTBP1_HUMAN  | Polypyrimidine tract-binding protein 1 OS-Homo sapiens GN=PTBP1 PE1 SV=1                               | 1               | 2 2982  | 2 2982          | 4       | 4 2982          | 4 2982  | 4 1756          | 4 1756  | 4 1756          |
| PTBP2_HUMAN  | Polypyrimidine tract-binding protein 2 OS-Homo sapiens GN=PTBP2 PE1 SV=1                               | 1               | 5 3225  | 5 3225          | 1       | 5 3225          | 5 3225  | 5 3225          | 5 3225  | 5 3225          |
| PTGES_HUMAN  | Prostaglandin G/H synthase 2 OS-Homo sapiens GN=PTGES PE1 SV=1                                         | 1               | 1 9603  | 1 9603          | 2 5955  | 1               | 1 9603  | 1 9603          | 1 9603  | 1 9603          |
| PTMA_HUMAN   | Prothymosin alpha OS-Homo sapiens GN=PTMA PE1 SV=2                                                     | 1               | 1 332   | 1 332           | 3       | 1 332           | 1 332   | 1 332           | 1 332   | 1 332           |
| PTRF_HUMAN   | Polymerase 1 and transcript release factor OS-Homo sapiens GN=PTRF PE1 SV=1                            | 3               | 4 5894  | 4 5894          | 1 7477  | 4               | 4 5894  | 4 5894          | 4 5894  | 4 5894          |
| PTX1_HUMAN   | Pentraxin-related protein 1 OS-Homo sapiens GN=PTX1 PE1 SV=2                                           | 1               | 1 314   | 1 314           | 4       | 2 075           | 2 075   | 0 8766          | 0 8766  | 0 8766          |
| PUF3_HUMAN   | Poly(U) binding splicing factor PUF3 OS-Homo sapiens GN=PUF3 PE1 SV=1                                  | 1               | 0 2828  | 0 2828          | 1       | 0 2828          | 0 2828  | 0 2828          | 0 2828  | 0 2828          |
| PUR1_HUMAN   | Multifunctional protein ADE2 OS-Homo sapiens GN=PUR1 PE1 SV=1                                          | 1               | 2 1452  | 2 1452          | 2       | 2 1452          | 2 1452  | 2 1452          | 2 1452  | 2 1452          |
| PUR2_HUMAN   | Adenosine diphosphate lyase-2 OS-Homo sapiens GN=PUR2 PE1 SV=3                                         | 1               | 3 9959  | 3 9959          | 3 9959  | 3 9959          | 3 9959  | 3 9959          | 3 9959  | 3 9959          |
| PXD1_HUMAN   | Peroxidase homolog OS-Homo sapiens GN=PXD1 PE1 SV=2                                                    | 1               | 1 415   | 1 415           | 6       | 1 091           | 1 091   | 0 9536          | 0 9536  | 0 9536          |
| QR_HUMAN     | Quinine oxidoreductase OS-Homo sapiens GN=QR PE1 SV=1                                                  | 1               | 1 6862  | 1 6862          | 1       | 1 6862          | 1 6862  | 1 6862          | 1 6862  | 1 6862          |
| QSOX1_HUMAN  | Sulfhydryl oxidase 1 OS-Homo sapiens GN=QSOX1 PE1 SV=2                                                 | 1               | 10 6482 | 10 6482         | 14      | 4 4492          | 4 4513  | 0 2297          | 0 2291  | 0 2263          |
| RAB11L_HUMAN | Heterogeneous nuclear ribonucleoprotein A1-like protein 2 OS-Homo sapiens GN=RAB11L2 PE2 SV=2          | 3               | 5 4236  | 5 4236          | 1 8296  | 1               | 5 4236  | 5 4236          | 5 4236  | 5 4236          |
| RAB12_HUMAN  | Putative heterogeneous nuclear ribonucleoprotein A1-like protein 2 OS-Homo sapiens GN=RAB12L1 PE2 SV=1 | 3               | 3 9825  | 3 9825          | 3 9825  | 3 9825          | 3 9825  | 3 9825          | 3 9825  | 3 9825          |
| RAB2_HUMAN   | Ras-related protein Rab-2 OS-Homo sapiens GN=RAB2 PE1 SV=2                                             | 1               | 3 296   | 3 296           | 1       | 3 296           | 3 296   | 3 296           | 3 296   | 3 296           |
| RAB4_HUMAN   | Ras-related protein Rab-4 OS-Homo sapiens GN=RAB4 PE1 SV=3                                             | 1               | 0 0295  | 0 0295          | 1       | 0 0295          | 0 0295  | 0 0295          | 0 0295  | 0 0295          |
| RAB6_HUMAN   | Ras-related protein Rab-6 OS-Homo sapiens GN=RAB6 PE1 SV=1                                             | 1               | 0 0295  | 0 0295          | 1       | 0 0295          | 0 0295  | 0 0295          | 0 0295  | 0 0295          |
| RAB7A_HUMAN  | Ras-related protein Rab-7a OS-Homo sapiens GN=RAB7A PE1 SV=1                                           | 1               | 0 729   | 0 729           | 3       | 1 524           | 1 524   | 1 3655          | 1 3655  | 1 3655          |
| RAD1_HUMAN   | Radix OS-Homo sapiens GN=RAD1 PE1 SV=1                                                                 | 1               | 27 3342 | 27 3342         | 4       | 12 0846         | 11 459  | 5 9742          | 6 4782  | 6 4756          |
| RAN_HUMAN    | GTP-binding nuclear protein Ran OS-Homo sapiens GN=RAN PE1 SV=3                                        | 1               | 1 185   | 1 185           | 3       | 2 9135          | 3 1074  | 2 7731          | 2 9782  | 2 9779          |
| RAN2_HUMAN   | Ran-specific protein Ran-2 OS-Homo sapiens GN=RAN2 PE1 SV=4                                            | 1               | 6 1429  | 6 1429          | 1       | 6 1429          | 6 1429  | 6 1429          | 6 1429  | 6 1429          |
| RBBP4_HUMAN  | Histone-binding protein RBBP4 OS-Homo sapiens GN=RBBP4 PE1 SV=3                                        | 1               | 6 1384  | 6 1384          | 1       | 6 1384          | 6 1384  | 6 1384          | 6 1384  | 6 1384          |
| RBBP7_HUMAN  | Histone-binding protein RBBP7 OS-Homo sapiens GN=RBBP7 PE1 SV=1                                        | 1               | 6 1384  | 6 1384          | 1       | 6 1384          | 6 1384  | 6 1384          | 6 1384  | 6 1384          |
| RHOA_HUMAN   | Transforming protein RhoA OS-Homo sapiens GN=RHOA PE1 SV=1                                             | 1               | 6 3409  | 6 3409          | 1       | 6 3409          | 6 3409  | 6 3409          | 6 3409  | 6 3409          |
| RHOB_HUMAN   | Rho-related GTP-binding protein RHOB OS-Homo sapiens GN=RHOB PE1 SV=1                                  | 1               | 6 3409  | 6 3409          | 1       | 6 3409          | 6 3409  | 6 3409          | 6 3409  | 6 3409          |
| RHOH_HUMAN   | Rho-related GTP-binding protein RHOH OS-Homo sapiens GN=RHOH PE1 SV=1                                  | 1               | 6 3409  | 6 3409          | 1       | 6 3409          | 6 3409  | 6 3409          | 6 3409  | 6 3409          |
| RL10A_HUMAN  | 60S ribosomal protein L10a OS-Homo sapiens GN=RL10A PE1 SV=2                                           | 1               | 4 4981  | 4 4981          | 2       | 6 4343          | 5 9084  | 3 5509          | 5 844   | 3 5115          |
| RL12_HUMAN   | 60S ribosomal protein L12 OS-Homo sapiens GN=RL12 PE1 SV=1                                             | 3               | 8 9325  | 8 9325          | 1 5241  | 2               | 3 325   | 3 325           | 0 9303  | 0 9303          |
| RLA0_HUMAN   | 60S acidic ribosomal protein P0 OS-Homo sapiens GN=RLP0 PE1 SV=1                                       | 1               | 7 038   | 7 038           | 5       | 4 252           | 3 3942  | 2 9473          | 2 3456  | 2 3401          |
| RLA0L_HUMAN  | 60S acidic ribosomal protein P0-like OS-Homo sapiens GN=RLP2 PE1 SV=1                                  | 1               | 7 038   | 7 038           | 5       | 4 252           | 3 3942  | 2 9473          | 2 3456  | 2 3401          |
| RLA1_HUMAN   | 60S acidic ribosomal protein P1 OS-Homo sapiens GN=RPL1 PE1 SV=1                                       | 2               | 12 0828 | 11 9978         | 11 9978 | 2               | 13 5183 | 13 0331         | 13 4387 | 12 8641         |
| RLA2_HUMAN   | 60S acidic ribosomal protein P2 OS-Homo sapiens GN=RPL2 PE1 SV=1                                       | 1               | 14 9738 | 14 9738         | 1       | 14 9738         | 14 9738 | 14 9738         | 14 9738 | 14 9738         |
| RNP_HUMAN    | Unconventional protein RNP OS-Homo sapiens GN=RNP PE1 SV=3                                             | 1               | 0 649   | 0 649           | 1       | 0 649           | 0 649   | 0 649           | 0 649   | 0 649           |
| RNXL3_HUMAN  | RNA-binding motif protein X-linked-like-3 OS-Homo sapiens GN=RNXL3 PE2 SV=2                            | 1               | 3 6019  | 3 6019          | 4       | 3 6019          | 3 6019  | 3 6019          | 3 6019  | 3 6019          |
| RNRB_HUMAN   | RNA-binding protein RNRB OS-Homo sapiens GN=RNRB PE1 SV=2                                              | 1               | 1 2574  | 1 2574          | 1       | 1 2574          | 1 2574  | 1 2574          | 1 2574  | 1 2574          |
| ROR1_HUMAN   | 60 kDa Src family tyrosine kinase OS-Homo sapiens GN=ROR1 PE1 SV=2                                     | 1               | 2 736   | 2 736           | 1       | 2 736           | 2 736   | 2 736           | 2 736   | 2 736           |
| ROA1_HUMAN   | Heterogeneous nuclear ribonucleoprotein A1 OS-Homo sapiens GN=RNPA1 PE1 SV=4                           | 1               | 2 7746  | 2 7746          | 1 5904  | 3               | 4 8975  | 5 1168          | 4 7224  | 4 9659          |
| ROA2_HUMAN   | Heterogeneous nuclear ribonucleoprotein A2B1 OS-Homo sapiens GN=RNPA2B1 PE1 SV=2                       | 1               | 7 2217  | 7 2217          | 3       | 4 9708          | 4 908   | 4 7399          | 4 699   | 4 7399          |
| ROGA_HUMAN   | Heterogeneous nuclear ribonucleoprotein A/B OS-Homo sapiens GN=RNPA1 PE1 SV=2                          | 1               | 7 4459  | 7 4459          | 1       | 7 4459          | 7 4459  | 7 4459          | 7 4459  | 7 4459          |
| ROD1_HUMAN   | Regulator of differentiation 1 OS-Homo sapiens GN=ROD1 PE1 SV=2                                        | 1               | 5 3225  | 5 3225          | 1       | 5 3225          | 5 3225  | 5 3225          | 5 3225  | 5 3225          |
| RPT1_HUMAN   | 40S ribosomal protein S18 OS-Homo sapiens GN=RPT1 PE1 SV=3                                             | 1               | 1 9817  | 1 9817          | 3       | 1 9817          | 1 9817  | 1 9817          | 1 9817  | 1 9817          |
| RS0_HUMAN    | 40S ribosomal protein S20 OS-Homo sapiens GN=RS0 PE1 SV=1                                              | 1               | 0 135   | 0 135           | 1       | 0 135           | 0 135   | 0 135           | 0 135   | 0 135           |
| RS1_HUMAN    | 40S ribosomal protein S21 OS-Homo sapiens GN=RS1 PE1 SV=1                                              | 1               | 0 9733  | 0 9733          | 1       | 0 9733          | 0 9733  | 0 9733          | 0 9733  | 0 9733          |
| RS2_HUMAN    | 40S ribosomal protein S22 OS-Homo sapiens GN=RS2 PE1 SV=1                                              | 1               | 0 7617  | 0 7617          | 1       | 0 7617          | 0 7617  | 0 7617          | 0 7617  | 0 7617          |
| RSU_HUMAN    | Ras suppressor protein 1 OS-Homo sapiens GN=RSU PE1 SV=3                                               | 1               | 1 7729  | 1 7729          | 1       | 1 7729          | 1 7729  | 1 7729          | 1 7729  | 1 7729          |
| RSU1_HUMAN   | Protein S100-A11 OS-Homo sapiens GN=S100A11 PE1 SV=2                                                   | 3               | 6 1313  | 6 1313          | 4 5263  | 3               | 5 3177  | 5 0653          | 5 2201  | 4 9454          |
| S100A1_HUMAN | Protein S100-A1 OS-Homo sapiens GN=S100A1 PE1 SV=1                                                     | 1               | 5 987   | 5 987           | 1       | 5 987           | 5 987   | 5 987           | 5 987   | 5 987           |
| SA1_HUMAN    | SUMO1 activating enzyme subunit 1 OS-Homo sapiens GN=SA1 PE1 SV=1                                      | 1               | 4 4454  | 4 4454          | 1       | 4 4454          | 4 4454  | 4 4454          | 4 4454  | 4 4454          |
| SAH1_HUMAN   | Adenosine homocysteine OS-Homo sapiens GN=SAH1 PE1 SV=4                                                | 1               | 6 5432  | 6 5432          | 2       | 3 3501          | 3 3501  | 1 0132          | 1 0132  | 1 0132          |
| SAP_HUMAN    | Proactivator polypeptide OS-Homo sapiens GN=SPAP PE1 SV=2                                              | 1               | 1 1569  | 1 1569          | 2       | 4 731           | 4 708   | 1 1444          | 9 8012  | 11 5618         |
| SENP7_HUMAN  | Serin-specific protease 7 OS-Homo sapiens GN=SENP7 PE1 SV=3                                            | 1               | 0 189   | 0 189           | 1       | 0 189           | 0 189   | 0 189           | 0 189   | 0 189           |
| SEPT1_HUMAN  | Septin-1 OS-Homo sapiens GN=SEPT1 PE1 SV=3                                                             | 1               | 0 686   | 0 686           | 1       | 0 686           | 0 686   | 0 686           | 0 686   | 0 686           |
| SEPT2_HUMAN  | Septin-2 OS-Homo sapiens GN=SEPT2 PE1 SV=1                                                             | 1               | 0 686   | 0 686           | 1       | 0 686           | 0 686   | 0 686           | 0 686   | 0 686           |
| SEPT3_HUMAN  | Septin-3 OS-Homo sapiens GN=SEPT3 PE1 SV=4                                                             | 1               | 0 686   | 0 686           | 1       | 0 686           | 0 686   | 0 686           | 0 686   | 0 686           |
| SET_HUMAN    | Protein SET OS-Homo sapiens GN=SET PE1 SV=3                                                            | 1               | 3 726   | 3 726           | 2       | 3 5657          | 3 5657  | 3 563           | 3 563   | 3 563           |
| SFRS1_HUMAN  | Splicing factor, arginine-rich 1 OS-Homo sapiens GN=SFRS1 PE1 SV=2                                     | 1               | 7 228   | 7 228           | 2       | 7 228           | 7 228   | 7 228           | 7 228   | 7 228           |
| SFRS2_HUMAN  | Splicing factor, arginine-rich 2 OS-Homo sapiens GN=SFRS2 PE1 SV=1                                     | 1               | 2 875   | 2 875           | 1       | 2 875           | 2 875   | 2 875           | 2 875   | 2 875           |
| SFRS3_HUMAN  | Splicing factor, arginine-rich 3 OS-Homo sapiens GN=SFRS3 PE1 SV=1                                     | 1               | 2 875   | 2 875           | 1       | 2 875           | 2 875   | 2 875           | 2 875   | 2 875           |
| SKP1_HUMAN   | S-phase kinase-associated protein 1 OS-Homo sapiens GN=SKP1 PE1 SV=2                                   | 1               | 0 3927  | 0 3927          | 1       | 0 3927          | 0 3927  | 0 3927          | 0 3927  | 0 3927          |

|             |                                                                                                                       |                           |   |         |         |        |        |        |        |        |
|-------------|-----------------------------------------------------------------------------------------------------------------------|---------------------------|---|---------|---------|--------|--------|--------|--------|--------|
| SMD1_HUMAN  | Small nuclear ribonucleoprotein Sm D1 OS=Homo sapiens GN=SNRPD1 PE=1 SV=1                                             | LSHVTVEIK                 | 1 | 0.252   | 0.252   | 1      | 0.252  | 0.252  | 0.252  | 0.252  |
| SDOC_HUMAN  | Superoxide dismutase (Cu,Zn) OS=Homo sapiens GN=SDSU1 PE=1 SV=2                                                       | GGPQVSGINFEK              | 3 | 5.2885  | 5.2189  | 1.2187 | 1      | 5.2885 | 5.2885 | 5.2885 |
| SOX2B_HUMAN | Transcription factor SOX-2B OS=Homo sapiens GN=SOX2B PE=1 SV=1                                                        | CAVEYTRK                  | 2 | 1.4707  | 1.4707  | 2.7119 | 1      | 1.4707 | 1.4707 | 1.4707 |
| SPB6_HUMAN  | Serin B6 OS=Homo sapiens GN=SERPINB6 PE=1 SV=3                                                                        | AFDSSGDTLSLISK            | 1 | 1.894   | 1.894   | 2      | 3.4807 | 3.4807 | 3.098  | 3.098  |
| SPB8_HUMAN  | Serin B8 OS=Homo sapiens GN=SERPINB8 PE=1 SV=2                                                                        | LVVAMVFK                  | 1 | 5.9377  | 5.9377  | 1      | 5.9377 | 5.9377 | 5.9377 | 5.9377 |
| SPB9_HUMAN  | Serin B9 OS=Homo sapiens GN=SERPINB9 PE=1 SV=1                                                                        | AFGLSTLTVK                | 1 | 6.9443  | 6.9443  | 3      | 4.3497 | 4.3497 | 1.9025 | 1.9025 |
| SP2_HUMAN   | Serin I2 OS=Homo sapiens GN=SERPIN2 PE=2 SV=1                                                                         | LVVAMVFK                  | 1 | 5.9377  | 5.9377  | 1      | 5.9377 | 5.9377 | 5.9377 | 5.9377 |
| SPON2_HUMAN | Spondin-2 OS=Homo sapiens GN=SPON2 PE=1 SV=2                                                                          | AFKPNWLDKSR               | 2 | 0.2771  | 0.2771  | 1      | 0.1076 | 0.1076 | 0.4037 | 0.4037 |
| SPRC_HUMAN  | SPARC OS=Homo sapiens GN=SPARC PE=1 SV=1                                                                              | IVPSPFWVGDLDLGDGGR        | 4 | 2.892   | 1.9506  | 6.7243 | 1      | 2.892  | 1.9506 | 6.7243 |
| SPSY_HUMAN  | Spermine synthase OS=Homo sapiens GN=SMS PE=1 SV=2                                                                    | DCGNLTKK                  | 1 | 3.3075  | 3.3075  | 1      | 3.3075 | 3.3075 | 3.3075 | 3.3075 |
| SPZT2_HUMAN | Spectrin alpha chain, brain OS=Homo sapiens GN=SPZTAN1 PE=1 SV=3                                                      | DIWLGGGGGCELVK            | 1 | 2.0715  | 2.0715  | 1      | 2.0715 | 2.0715 | 2.0715 | 2.0715 |
| SRG1_HUMAN  | Serylargin OS=Homo sapiens GN=SRG1 PE=1 SV=2                                                                          | SPHMLPSEK                 | 2 | 5.1098  | 5.1098  | 1      | 2.8    | 2.8    | 1.4916 | 1.4916 |
| SRP9_HUMAN  | Signal recognition particle 9 kDa protein OS=Homo sapiens GN=SRP9 PE=1 SV=2                                           | TIK_FPK                   | 2 | 0.4394  | 0.4233  | 1.2945 | 1      | 0.4394 | 0.4233 | 1.2945 |
| SRP94_HUMAN | Signal recognition particle 94 kDa protein OS=Homo sapiens GN=SRP94 PE=1 SV=1                                         | YVDKLVK                   | 2 | 3.749   | 6.2517  | 1.109  | 1      | 2.7485 | 6.2748 | 6.2748 |
| SRP98_HUMAN | Signal recognition particle 98 kDa protein OS=Homo sapiens GN=SRP98 PE=1 SV=1                                         | LLGANGGDLK                | 1 | 0.0577  | 0.0577  | 1      | 0.0577 | 0.0577 | 0.0577 | 0.0577 |
| SRP9_HUMAN  | Small ribosomal subunit protein SRP9 OS=Homo sapiens GN=SRP9 PE=2 SV=1                                                | DTAGDLTDLK                | 1 | 0.9633  | 0.9633  | 1      | 0.9633 | 0.9633 | 0.9633 | 0.9633 |
| STAU1_HUMAN | Double-stranded RNA-binding protein Staufen homolog 1 OS=Homo sapiens GN=STAU1 PE=1 SV=2                              | SEISDVEHLK                | 1 | 0.303   | 0.303   | 1      | 0.303  | 0.303  | 0.303  | 0.303  |
| STC2_HUMAN  | Stomach-specific OS=Homo sapiens GN=STC2 PE=1 SV=1                                                                    | YVDFRYSK                  | 1 | 0.3377  | 0.3377  | 1      | 0.1377 | 0.1377 | 0.1377 | 0.1377 |
| STP1_HUMAN  | Strand-induced phosphatase 1 OS=Homo sapiens GN=STP1 PE=1 SV=1                                                        | ALVGVNMDALCYSEK           | 1 | 0.0671  | 0.0671  | 7      | 4.4289 | 4.9258 | 3.1119 | 3.7207 |
| STMN1_HUMAN | Stathmin OS=Homo sapiens GN=STMN1 PE=1 SV=3                                                                           | ALENNNFK                  | 1 | 3.2972  | 3.2972  | 3      | 6.0714 | 6.0714 | 5.4068 | 5.4068 |
| STMN2_HUMAN | Stathmin-2 OS=Homo sapiens GN=STMN2 PE=1 SV=3                                                                         | DLSELEK                   | 1 | 10.2239 | 10.2239 | 1      | 4.7031 | 4.7031 | 4.7031 | 4.7031 |
| STN3_HUMAN  | Stathmin-4 OS=Homo sapiens GN=STN3 PE=2 SV=1                                                                          | KLEAEER                   | 1 | 4.7031  | 4.7031  | 1      | 4.7031 | 4.7031 | 4.7031 | 4.7031 |
| STRAP_HUMAN | Serine-threonine kinase receptor-associated protein OS=Homo sapiens GN=STRAP PE=1 SV=1                                | YDRASSGLYSK               | 1 | 4.845   | 4.845   | 1      | 4.845  | 4.845  | 4.845  | 4.845  |
| STRP_HUMAN  | Spermatid perinuclear RNA-binding protein OS=Homo sapiens GN=STRP PE=1 SV=1                                           | GMPLLEK                   | 1 | 2.1615  | 2.1615  | 1      | 2.1615 | 2.1615 | 2.1615 | 2.1615 |
| SUMO2_HUMAN | Small ubiquitin-related modifier 2 OS=Homo sapiens GN=SUMO2 PE=1 SV=1                                                 | TEKNHILK                  | 1 | 2.4404  | 2.4404  | 2      | 1.3348 | 0.9663 | 0.748  | 0.5043 |
| SUMO3_HUMAN | Small ubiquitin-related modifier 3 OS=Homo sapiens GN=SUMO3 PE=1 SV=2                                                 | WAGDQSVGFK                | 2 | 0.2293  | 0.1898  | 2.451  | 1      | 0.2293 | 0.2293 | 0.2293 |
| SUMO4_HUMAN | Small ubiquitin-related modifier 4 OS=Homo sapiens GN=SUMO4 PE=1 SV=2                                                 | WAGDQSVGFK                | 1 | 0.1007  | 0.1007  | 1      | 0.1007 | 0.1007 | 0.1007 | 0.1007 |
| SVCP1_HUMAN | Sushi, von Willebrand factor type A, EGF and pentraxin domain-containing protein 1 OS=Homo sapiens GN=SVCP1 PE=1 SV=2 | AFGLADYVDPKSR             | 1 | 1.9272  | 1.9272  | 2      | 1.7889 | 1.7889 | 1.0759 | 1.0759 |
| SYEP_HUMAN  | Bifunctional aminocyl RNA synthetase OS=Homo sapiens GN=SYEP PE=1 SV=1                                                | ITGPNVYSDK                | 1 | 1.9258  | 1.9258  | 1      | 1.9258 | 1.9258 | 1.9258 | 1.9258 |
| SYG_HUMAN   | Glycyl RNA synthetase OS=Homo sapiens GN=GARS PE=1 SV=2                                                               | LGVFNFFVSSGSLK            | 1 | 1.8699  | 1.8699  | 1      | 1.8699 | 1.8699 | 1.8699 | 1.8699 |
| SYN3_HUMAN  | Asparaginyl RNA synthetase, cytoplasmic OS=Homo sapiens GN=NARS PE=1 SV=3                                             | IFSEELAGK                 | 1 | 3.7154  | 3.7154  | 1      | 3.7154 | 3.7154 | 3.7154 | 3.7154 |
| SYT1_HUMAN  | Threonyl RNA synthetase, cytoplasmic OS=Homo sapiens GN=NARS PE=1 SV=3                                                | ILGDEVDWQK                | 1 | 2.0446  | 2.0446  | 1      | 2.0446 | 2.0446 | 2.0446 | 2.0446 |
| SYW2_HUMAN  | Tyrosinyl RNA synthetase, cytoplasmic OS=Homo sapiens GN=NARS PE=1 SV=2                                               | DVAGDFDK                  | 1 | 3.1146  | 3.1146  | 2      | 3.0814 | 3.0814 | 1.3564 | 1.3564 |
| TAGL_HUMAN  | Transglutinin OS=Homo sapiens GN=TAGLN PE=1 SV=4                                                                      | DMNQDLYDK                 | 1 | 5.8481  | 5.8481  | 1      | 5.8481 | 5.8481 | 5.8481 | 5.8481 |
| TAGL2_HUMAN | Transglutinin-2 OS=Homo sapiens GN=TAGLN2 PE=1 SV=3                                                                   | ADLFDIVK                  | 1 | 0.407   | 0.407   | 6      | 0.4321 | 0.4321 | 0.323  | 0.323  |
| TAGL3_HUMAN | Transglutinin-3 OS=Homo sapiens GN=TAGLN3 PE=1 SV=2                                                                   | DMANYSK                   | 1 | 0.1967  | 0.1967  | 1      | 0.1967 | 0.1967 | 0.1967 | 0.1967 |
| TALDO_HUMAN | Transaldolase OS=Homo sapiens GN=TALDO1 PE=1 SV=2                                                                     | AKQASLQK                  | 1 | 7.5981  | 7.5981  | 5      | 5.9216 | 5.9216 | 4.9666 | 4.9666 |
| TBA1A_HUMAN | Tubulin alpha-1A chain OS=Homo sapiens GN=TUBA1A PE=1 SV=1                                                            | ALAGDQLTSPK               | 2 | 9.1783  | 9.1167  | 1.1784 | 1      | 9.1783 | 9.1167 | 1.1784 |
| TBA1B_HUMAN | Tubulin alpha-1B chain OS=Homo sapiens GN=TUBA1B PE=1 SV=1                                                            | LUSELDGAK                 | 2 | 4.5481  | 4.5481  | 3.9277 | 1      | 4.5481 | 4.5481 | 3.9277 |
| TBA1C_HUMAN | Tubulin alpha-1C chain OS=Homo sapiens GN=TUBA1C PE=1 SV=1                                                            | LSSTVEGQK                 | 4 | 3.2035  | 1.8472  | 4.8802 | 1      | 3.2035 | 1.8472 | 4.8802 |
| TBA4A_HUMAN | Tubulin alpha-4A chain OS=Homo sapiens GN=TUBA4A PE=1 SV=1                                                            | WLHNEGMAEK                | 1 | 2.9803  | 2.9803  | 1      | 2.9803 | 2.9803 | 2.9803 | 2.9803 |
| TBA4B_HUMAN | Tubulin alpha-4B chain OS=Homo sapiens GN=TUBA4B PE=5 SV=2                                                            | DYVAMVFK                  | 1 | 8.4984  | 8.4984  | 4      | 4.8403 | 4.8403 | 1.4987 | 1.4987 |
| TBA8_HUMAN  | Tubulin beta-8 chain OS=Homo sapiens GN=TUBA8 PE=1 SV=1                                                               | EDMALEK                   | 1 | 5.4319  | 5.4319  | 1      | 5.4319 | 5.4319 | 5.4319 | 5.4319 |
| TB2A_HUMAN  | Tubulin beta-2A chain OS=Homo sapiens GN=TUB2A PE=1 SV=1                                                              | OLFPFLQTK                 | 1 | 4.8148  | 4.8148  | 1      | 4.8148 | 4.8148 | 4.8148 | 4.8148 |
| TB2C_HUMAN  | Tubulin beta-2C chain OS=Homo sapiens GN=TUB2C PE=1 SV=1                                                              | SIQVVDVPTGFK              | 2 | 1.0716  | 1.0492  | 1.3384 | 1      | 1.0716 | 1.0492 | 1.3384 |
| TB3_HUMAN   | Tubulin beta-3 chain OS=Homo sapiens GN=TUB3 PE=1 SV=2                                                                | TGGDSDSNTFFSETGAK         | 2 | 5.6288  | 5.6288  | 1.1319 | 6      | 4.7955 | 4.9074 | 2.1842 |
| TB4_HUMAN   | Tubulin beta-4 chain OS=Homo sapiens GN=TUB4 PE=1 SV=2                                                                | EDMALEK                   | 1 | 5.4319  | 5.4319  | 1      | 5.4319 | 5.4319 | 5.4319 | 5.4319 |
| TB4A_HUMAN  | Tubulin beta-4A chain OS=Homo sapiens GN=TUB4A PE=5 SV=1                                                              | EDMALEK                   | 1 | 5.4319  | 5.4319  | 1      | 5.4319 | 5.4319 | 5.4319 | 5.4319 |
| TB4B_HUMAN  | Tubulin beta-4B chain OS=Homo sapiens GN=TUB4B PE=5 SV=2                                                              | EDMALEK                   | 1 | 5.4319  | 5.4319  | 1      | 5.4319 | 5.4319 | 5.4319 | 5.4319 |
| TB8A_HUMAN  | Tubulin beta-8A chain OS=Homo sapiens GN=TUB8A PE=1 SV=1                                                              | EDMALEK                   | 1 | 5.4319  | 5.4319  | 1      | 5.4319 | 5.4319 | 5.4319 | 5.4319 |
| TB8B_HUMAN  | Tubulin beta-8B chain OS=Homo sapiens GN=TUB8B PE=1 SV=1                                                              | EDMALEK                   | 1 | 5.4319  | 5.4319  | 1      | 5.4319 | 5.4319 | 5.4319 | 5.4319 |
| TB8C_HUMAN  | Tubulin beta-8C chain OS=Homo sapiens GN=TUB8C PE=1 SV=1                                                              | EDMALEK                   | 1 | 5.4319  | 5.4319  | 1      | 5.4319 | 5.4319 | 5.4319 | 5.4319 |
| TCPA_HUMAN  | Activated RNA polymerase II transcriptional coactivator p15 OS=Homo sapiens GN=SUB1 PE=1 SV=3                         | DYVAMVFK                  | 1 | 8.4984  | 8.4984  | 1.38   | 3      | 5.49   | 4.7519 | 5.1428 |
| TCPA_HUMAN  | T-complex protein 1 subunit alpha OS=Homo sapiens GN=CCT1 PE=1 SV=1                                                   | SPFGQVRRPDPNFFGSSGALNNAWK | 1 | 4.4812  | 4.4812  | 1      | 4.4812 | 4.4812 | 4.4812 | 4.4812 |
| TCPD_HUMAN  | T-complex protein 1 subunit delta OS=Homo sapiens GN=CCT4 PE=1 SV=4                                                   | EIVHAGGCGNQIAK            | 1 | 8.3639  | 8.3639  | 3      | 3.3062 | 4.2555 | 2.4925 | 2.8234 |
| TCPG_HUMAN  | T-complex protein 1 subunit gamma OS=Homo sapiens GN=CCT3 PE=1 SV=4                                                   | ENHLAGGCGNQIAK            | 1 | 8.3639  | 8.3639  | 3      | 3.3062 | 4.2555 | 2.4925 | 2.8234 |
| TCPH_HUMAN  | T-complex protein 1 subunit eta OS=Homo sapiens GN=CCT7 PE=1 SV=2                                                     | ENHLAGGCGNQIAK            | 1 | 8.3639  | 8.3639  | 3      | 3.3062 | 4.2555 | 2.4925 | 2.8234 |
| TCPQ_HUMAN  | T-complex protein 1 subunit theta OS=Homo sapiens GN=CCT8 PE=1 SV=4                                                   | ENHLAGGCGNQIAK            | 1 | 8.3639  | 8.3639  | 3      | 3.3062 | 4.2555 | 2.4925 | 2.8234 |
| TCTP_HUMAN  | Translatiionally controlled protein OS=Homo sapiens GN=TCP1 PE=1 SV=1                                                 | ENHLAGGCGNQIAK            | 1 | 8.3639  | 8.3639  | 3      | 3.3062 | 4.2555 | 2.4925 | 2.8234 |
| TEBP_HUMAN  | Progesterandien E synthase 3 OS=Homo sapiens GN=PTGES3 PE=1 SV=1                                                      | ENHLAGGCGNQIAK            | 1 | 8.3639  | 8.3639  | 3      | 3.3062 | 4.2555 | 2.4925 | 2.8234 |
| TERA_HUMAN  | Transitional endoplasmic reticulum ATPase OS=Homo sapiens GN=HSP70 PE=1 SV=4                                          | ENHLAGGCGNQIAK            | 1 | 8.3639  | 8.3639  | 3      | 3.3062 | 4.2555 | 2.4925 | 2.8234 |
| TFM_HUMAN   | Tetraheterin OS=Homo sapiens GN=CLEC9B PE=1 SV=2                                                                      | ENHLAGGCGNQIAK            | 1 | 8.3639  | 8.3639  | 3      | 3.3062 | 4.2555 | 2.4925 | 2.8234 |

|              |                                                                                            |                           |   |         |         |         |        |         |         |         |         |         |
|--------------|--------------------------------------------------------------------------------------------|---------------------------|---|---------|---------|---------|--------|---------|---------|---------|---------|---------|
| TGM2_HUMAN   | Protein glutamine gamma-glutamyltransferase 2 OS=Homo sapiens GN=TGM2 PE=1 SV=2            | NFEGEIQGK                 | 1 | 0.043   | 0.043   | 2       | 1.8668 | 1.8668  | 0.3984  | 0.3984  | 0.3984  | 23.2956 |
| THO_HUMAN    | Thioredoxin OS=Homo sapiens GN=TXN PE=1 SV=3                                               | VLLNLEPSEK                | 1 | 3.6955  | 3.6955  |         |        |         |         |         |         | 7.3895  |
| THOM_HUMAN   | Thioredoxin mitochondrial OS=Homo sapiens GN=TXN2 PE=1 SV=2                                | TSRISLDMLEK               | 1 | 7.3911  | 7.3911  | 1.03    | 1.7307 | 7.3911  | 7.3911  | 7.3911  |         | 1.2072  |
| TICN1_HUMAN  | Testican-1 OS=Homo sapiens GN=SPOCK1 PE=1 SV=1                                             | VWNSETPVDVDFHWGGQPK       | 1 | 0.1832  | 0.1832  | 1       | 0.1832 | 0.1832  | 0.1832  | 0.1832  |         | 1.8678  |
| TICN3_HUMAN  | Testican-3 OS=Homo sapiens GN=SPOCK3 PE=1 SV=2                                             | DSLGMFRR                  | 1 | 0.3206  | 0.3206  |         |        |         |         |         |         | 0.3111  |
| TIMP1_HUMAN  | Metalloproteinase inhibitor 1 OS=Homo sapiens GN=TIMP1 PE=1 SV=1                           | FQTSPLPKQ                 | 1 | 0.3969  | 0.3969  | 2.108   | 0.3363 | 0.3442  | 0.3378  | 0.3438  |         | 0.4249  |
| TIMP2_HUMAN  | Metalloproteinase inhibitor 2 OS=Homo sapiens GN=TIMP2 PE=1 SV=2                           | DIETFTAPSSAVCVSLDVGSK     | 1 | 0.4101  | 0.4101  | 5       | 0.3405 | 0.3418  | 0.3361  | 0.3398  |         | 1.2024  |
| TKT_HUMAN    | Transketolase OS=Homo sapiens GN=TKT PE=1 SV=3                                             | AVELAANTK                 | 1 | 0.6046  | 0.6046  | 7       | 0.3015 | 0.3008  | 0.3123  | 0.31769 |         | 2.9556  |
| TLN1_HUMAN   | Talin-1 OS=Homo sapiens GN=TLN1 PE=1 SV=3                                                  | AGCEAGPLEMSALSVYVNLK      | 1 | 2.0475  | 2.0475  | 10      | 0.3048 | 2.9991  | 2.9447  | 1.4885  |         | 4.1489  |
| TLN2_HUMAN   | Talin-2 OS=Homo sapiens GN=TLN2 PE=1 SV=4                                                  | SAWATSAL                  | 1 | 0.1048  | 0.1048  | 2       | 0.252  | 1.3483  | 0.7280  | 0.2759  |         | 0.2444  |
| TDGF_HUMAN   | Tumor necrosis factor receptor type 1 OS=Homo sapiens GN=TNFR1 PE=1 SV=2                   | VEEEDLSQVLA               | 1 | 0.8281  | 0.8281  | 1       | 0.8281 | 0.8281  | 0.8281  | 0.8281  |         | 0.8281  |
| TFPI_HUMAN   | Tissue inhibitor of metalloproteinases 1 OS=Homo sapiens GN=TFPI PE=1 SV=2                 | ELASDPVDFLVGASLKPFEVDIANK | 1 | 10.6666 | 10.0027 | 16694   | 10     | 0.10147 | 8.5256  | 7.0028  | 6.8332  | 2.3625  |
| TPIS_HUMAN   | Putative triosephosphate isomerase-like protein LOC286018 OS=Homo sapiens PE=1 SV=2        | WFEQIK                    | 1 | 3.2632  | 3.2632  |         |        |         |         |         |         | 2.2403  |
| TPM1_HUMAN   | Tropomyosin alpha-1 chain OS=Homo sapiens GN=TPM1 PE=1 SV=2                                | IQVLEELLR                 | 1 | 11.6397 | 11.6397 | 3       | 0.6746 | 8.4343  | 6.9799  | 7.5417  |         | 7.4485  |
| TPM2_HUMAN   | Tropomyosin beta chain OS=Homo sapiens GN=TPM2 PE=1 SV=1                                   | IQVLEELLR                 | 1 | 11.6397 | 11.6397 | 3       | 0.6454 | 6.4454  | 4.9658  | 4.9658  |         | 4.9658  |
| TPM3_HUMAN   | Tropomyosin alpha-3 chain OS=Homo sapiens GN=TPM3 PE=1 SV=1                                | IQVLEELLR                 | 1 | 11.6397 | 11.6397 | 3       | 0.6746 | 8.4343  | 6.9799  | 7.5417  |         | 7.4485  |
| TPM3L_HUMAN  | Putative tropomyosin alpha-3 chain-like protein OS=Homo sapiens PE=3 SV=2                  | MELEIQK                   | 2 | 8.5132  | 8.5132  | 13726   | 1      | 9.5132  | 9.5132  | 9.5132  |         | 9.2795  |
| TPM4_HUMAN   | Tropomyosin alpha-4 chain OS=Homo sapiens GN=TPM4 PE=1 SV=3                                | MELEIQK                   | 2 | 8.5132  | 8.5132  | 13726   | 8      | 6.8199  | 6.1391  | 2.8458  | 2.7783  | 2.7641  |
| TPST_HUMAN   | Thyroid hormone receptor-associated protein 3 OS=Homo sapiens GN=TRAP3 PE=1 SV=2           | WFEQIK                    | 1 | 3.2632  | 3.2632  |         |        |         |         |         |         | 7.198   |
| TRFE_HUMAN   | Testosterone 5alpha-reductase OS=Homo sapiens GN=TRFE PE=1 SV=2                            | WFEQIK                    | 1 | 3.2632  | 3.2632  |         |        |         |         |         |         | 7.198   |
| TRFL_HUMAN   | Testosterone 5alpha-reductase OS=Homo sapiens GN=TRFL PE=1 SV=6                            | WFEQIK                    | 1 | 3.2632  | 3.2632  |         |        |         |         |         |         | 7.198   |
| TRXR1_HUMAN  | Thioredoxin reductase 1, cytoplasmic OS=Homo sapiens GN=TXNRD1 PE=1 SV=3                   | SYVDYLLHGIGGSSQVLA        | 1 | 3.8551  | 3.8551  | 1       | 3.8551 | 3.8551  | 3.8551  | 3.8551  |         | 3.8551  |
| TSPI_HUMAN   | Thrombospondin-1 OS=Homo sapiens GN=THBS1 PE=1 SV=2                                        | AGTLDLSTVQK               | 3 | 33.8041 | 28.9431 | 18228   | 24     | 13.791  | 14.6824 | 7.8557  | 10.2297 | 9.19    |
| TXN2_HUMAN   | Thioredoxin domain-containing protein 5 OS=Homo sapiens GN=TXNDC5 PE=1 SV=2                | ALAPFWELCALGHEISETK       | 2 | 4.7783  | 4.589   | 1489    | 3      | 6.0118  | 5.0202  | 5.0134  | 4.2885  | 6.482   |
| TXN1_HUMAN   | Thioredoxin-like protein 1 OS=Homo sapiens GN=TXN1 PE=1 SV=3                               | EPFLGAGK                  | 2 | 2.4374  | 2.4065  | 1254    |        |         |         |         |         | 2.1094  |
| UZAF2_HUMAN  | Splicing factor UZAF 65 kDa subunit OS=Homo sapiens GN=UZAF2 PE=1 SV=4                     | SEPTQALETDEDDEDQVPLR      | 1 | 2.2684  | 2.2684  | 2.2684  | 1      | 2.2684  | 2.2684  | 2.2684  |         | 2.2684  |
| UAP6_HUMAN   | Spliceosome ZNAF 65 kDa subunit OS=Homo sapiens GN=UAP6 PE=1 SV=1                          | ELLTSPGK                  | 1 | 0.2004  | 0.2004  | 2       | 1.1772 | 1.1772  | 0.657   | 0.657   |         | 0.657   |
| UBC1_3_HUMAN | Ubiquitin-conjugating enzyme E1 OS=Homo sapiens GN=UBC1 PE=1 SV=1                          | GLGCLPFGHAWHRYNRYK        | 1 | 1.6372  | 1.6372  | 2       | 1.9602 | 1.9602  | 1.7233  | 1.7233  |         | 1.7233  |
| UBC3_HUMAN   | Ubiquitin-conjugating enzyme E2 OS=Homo sapiens GN=UBE2 PE=1 SV=1                          | GLGCLPFGHAWHRYNRYK        | 1 | 1.6372  | 1.6372  | 2       | 1.9602 | 1.9602  | 1.7233  | 1.7233  |         | 1.7233  |
| UBC9_HUMAN   | Ubiquitin-conjugating enzyme E2 OS=Homo sapiens GN=UBE2 PE=1 SV=1                          | GLGCLPFGHAWHRYNRYK        | 1 | 1.6372  | 1.6372  | 2       | 1.9602 | 1.9602  | 1.7233  | 1.7233  |         | 1.7233  |
| UCHL1_HUMAN  | Ubiquitin carboxyl-terminal hydrolase isozyme L1 OS=Homo sapiens GN=UCHL1 PE=1 SV=2        | GLGCLPFGHAWHRYNRYK        | 1 | 1.6372  | 1.6372  | 2       | 1.9602 | 1.9602  | 1.7233  | 1.7233  |         | 1.7233  |
| UGPA_HUMAN   | UTP-glucose-1-phosphate uridylyltransferase OS=Homo sapiens GN=UGP2 PE=1 SV=5              | GLGCLPFGHAWHRYNRYK        | 1 | 1.6372  | 1.6372  | 2       | 1.9602 | 1.9602  | 1.7233  | 1.7233  |         | 1.7233  |
| ULK3_HUMAN   | Serine/threonine protein kinase ULK3 OS=Homo sapiens GN=ULK3 PE=2 SV=2                     | EGKLLR                    | 1 | 11.8494 | 11.8494 | 11.8494 | 1      | 11.8494 | 11.8494 | 11.8494 |         | 11.8494 |
| UVRAG_HUMAN  | Ultraviolet radiation endonuclease OS=Homo sapiens GN=UVRAG PE=1 SV=1                      | ALRGVALLIK                | 1 | 0.1028  | 0.1028  | 1       | 0.1028 | 0.1028  | 0.1028  | 0.1028  |         | 0.1028  |
| VSN_HUMAN    | Vimentin OS=Homo sapiens GN=VSN PE=1 SV=1                                                  | ALRGVALLIK                | 1 | 0.1028  | 0.1028  | 1       | 0.1028 | 0.1028  | 0.1028  | 0.1028  |         | 0.1028  |
| VIM_HUMAN    | Vimentin OS=Homo sapiens GN=VIM PE=1 SV=4                                                  | ALRGVALLIK                | 1 | 0.1028  | 0.1028  | 1       | 0.1028 | 0.1028  | 0.1028  | 0.1028  |         | 0.1028  |
| VINC_HUMAN   | Vinculin OS=Homo sapiens GN=VCL PE=1 SV=4                                                  | ALRGVALLIK                | 1 | 0.1028  | 0.1028  | 1       | 0.1028 | 0.1028  | 0.1028  | 0.1028  |         | 0.1028  |
| VIT1_HUMAN   | Vacuolar protein sorting-associated protein VIT1 homolog OS=Homo sapiens GN=VIT1 PE=1 SV=1 | ALRGVALLIK                | 1 | 0.1028  | 0.1028  | 1       | 0.1028 | 0.1028  | 0.1028  | 0.1028  |         | 0.1028  |
| VWF_HUMAN    | von Willebrand factor OS=Homo sapiens GN=VWF PE=1 SV=2                                     | ALRGVALLIK                | 1 | 0.1028  | 0.1028  | 1       | 0.1028 | 0.1028  | 0.1028  | 0.1028  |         | 0.1028  |
| WDR1_HUMAN   | WD repeat-containing protein 1 OS=Homo sapiens GN=WDR1 PE=1 SV=4                           | ALRGVALLIK                | 1 | 0.1028  | 0.1028  | 1       | 0.1028 | 0.1028  | 0.1028  | 0.1028  |         | 0.1028  |
| YBX1_HUMAN   | Nucleic-acid sensitive element-binding protein 1 OS=Homo sapiens GN=YBX1 PE=1 SV=3         | ALRGVALLIK                | 1 | 0.1028  | 0.1028  | 1       | 0.1028 | 0.1028  | 0.1028  | 0.1028  |         | 0.1028  |

HUVEC:LA Fibroblasts

| Accession   | Description                                                                                                             | Sequence                                                                                                                                                                                                                                        | # Individ                                                          | Pep SM ratio                                                                                                                                    | Pep GM ratio      | Pep ratio                                                                                                         | # pep species | Prot SM of pep SMs                                                                                        | Prot GM of pep SMs | Prot GM of pep SMs | Prot GM of pep SMs | Prot GM of pep SMs | Protein ID | Protein Name |
|-------------|-------------------------------------------------------------------------------------------------------------------------|-------------------------------------------------------------------------------------------------------------------------------------------------------------------------------------------------------------------------------------------------|--------------------------------------------------------------------|-------------------------------------------------------------------------------------------------------------------------------------------------|-------------------|-------------------------------------------------------------------------------------------------------------------|---------------|-----------------------------------------------------------------------------------------------------------|--------------------|--------------------|--------------------|--------------------|------------|--------------|
| 1433E_HUMAN | 14-3-3 protein beta/alpha OS=Homo sapiens GN+YWHAH PE=1 SV=3                                                            | IEALQDICNDVLELLIK<br>NLLSVAYK<br>QTVYSOQAVQEAFFSEIK<br>TAFDEAIEDLTNEESYK<br>YDQMAAIK<br>YLSWASSGDK                                                                                                                                              | 2<br>1<br>1<br>1<br>1<br>1                                         | 7.0837<br>14.9084<br>3.353<br>3.9702<br>0.1703<br>0.1974                                                                                        | 0.4206<br>14.9084 | 144.3775                                                                                                          | 7             | 4.225<br>1.891<br>7.313                                                                                   | 6.3592<br>7.6395   | 7.5799             | 6.5205             | 3.1930             | 1.6188     |              |
| 1433F_HUMAN | 14-3-3 protein eta OS=Homo sapiens GN+YWHAE PE=1 SV=4                                                                   | AAPDMIEDLTNEESYK<br>DSTLMQLR<br>EAENSLWVK<br>HLPANQTESEK<br>LICDLDVLDK<br>NLLSVAYK<br>QNAVTELEK                                                                                                                                                 | 2<br>2<br>2<br>2<br>2<br>2<br>2                                    | 7.0837<br>7.0837<br>9.0608<br>7.0826<br>11.9684<br>7.0778<br>4.1779                                                                             | 0.4206<br>0.4206  | 144.3775                                                                                                          | 6             | 8.255<br>8.0324<br>14.9084<br>4.5036<br>3.7078<br>0.1799                                                  | 6.6702<br>3.7686   | 4.5437             | 2.3828             | 4.8112             |            |              |
| 1433G_HUMAN | 14-3-3 protein gamma OS=Homo sapiens GN+YWHAG PE=1 SV=2                                                                 | DSTLMQLR<br>TAFDMAIEDLTNEESYK<br>YDQMAAIK<br>YLSWASSGDK                                                                                                                                                                                         | 2<br>3<br>2                                                        | 14.1448<br>0.1514<br>1.1034                                                                                                                     | 14.1448           | 144.3775                                                                                                          | 4             | 3.1514<br>0.1195<br>2.4092<br>6.7355                                                                      | 3.8767<br>2.1263   | 0.7831             | 0.4441             | 0.3191             | 8.3304     |              |
| 1433S_HUMAN | 14-3-3 protein sigma OS=Homo sapiens GN+SFN PE=1 SV=1                                                                   | DSTLMQLR<br>NLLSVAYK                                                                                                                                                                                                                            | 2                                                                  | 7.0837<br>14.9084                                                                                                                               | 0.4206            | 144.3775                                                                                                          | 2             | 10.996<br>9.6919                                                                                          | 10.2765            | 9.0778             | 1.3816             | 1.6625             |            |              |
| 1433T_HUMAN | 14-3-3 protein theta OS=Homo sapiens GN+YWHAG PE=1 SV=1                                                                 | DSTLMQLR<br>DSTLMQLR<br>DKWLDLEK<br>EIKTELR<br>FLRNAGSEIK<br>GVDSOQAVQEAFFSEIK<br>NLLSVAYK<br>TAFDMAIEDLTNEESYK<br>YVSSIEGK<br>YDQMAAIK<br>YLSWASSGDK                                                                                           | 2<br>2<br>1<br>1<br>1<br>1<br>1<br>1<br>1<br>1<br>2                | 7.0837<br>14.9084<br>10.8501<br>4.2878<br>9.5286<br>14.9084<br>5.5868<br>2.4798<br>2.2375<br>6.4245                                             | 0.4206            | 144.3775                                                                                                          | 7             | 8.255<br>1.891<br>7.313<br>4.4536<br>5.4636<br>8.2472<br>1.634<br>13.1871<br>13.1871<br>3.9077<br>14.9084 | 8.2592<br>7.8118   | 7.384              | 7.0966             | 2.7837             | 1.6755     |              |
| 1433Z_HUMAN | 14-3-3 protein zeta/delta OS=Homo sapiens GN+YWHAE PE=1 SV=1                                                            | DKWLDLEK<br>DSTLMQLR<br>EIKTELR<br>FLRNAGSEIK<br>GVDSOQAVQEAFFSEIK<br>NLLSVAYK<br>TAFDMAIEDLTNEESYK<br>YVSSIEGK<br>YDQMAAIK<br>YLSWASSGDK                                                                                                       | 2<br>2<br>1<br>1<br>1<br>1<br>1<br>1<br>1<br>2                     | 12.8294<br>7.0837<br>10.8501<br>4.2878<br>9.5286<br>14.9084<br>5.5868<br>2.4798<br>2.2375<br>6.4245                                             | 11.9722<br>0.4206 | 144.3775                                                                                                          | 10            | 8.255<br>1.891<br>7.313<br>4.4536<br>5.4636<br>8.2472<br>1.634<br>13.1871<br>13.1871<br>3.9077<br>14.9084 | 8.3587<br>8.4026   | 7.6182             | 7.7713             | 5.7595             | 1.5845     |              |
| ZAA_HUMAN   | Serine/threonine protein phosphatase 2A [Ss 30a regulatory subunit A alpha isoform] OS=Homo sapiens GN+PP2R1A PE=1 SV=4 | QLSQSLPLWLVLEADK                                                                                                                                                                                                                                | 2                                                                  | 2.4525                                                                                                                                          | 3.0264            | 1.0079                                                                                                            | 1             | 5.4528                                                                                                    | 5.4525             | 5.4525             | 5.4525             | 5.4524             |            |              |
| ZAB_HUMAN   | Serine/threonine protein phosphatase 2A [Ss 30a regulatory subunit A beta isoform] OS=Homo sapiens GN+PP2R1B PE=1 SV=3  | QLSQSLPLWLVLEADK                                                                                                                                                                                                                                | 2                                                                  | 2.4525                                                                                                                                          | 3.0264            | 1.0079                                                                                                            | 1             | 5.4528                                                                                                    | 5.4525             | 5.4525             | 5.4525             | 5.4524             |            |              |
| ZPG_HUMAN   | 6-phosphogluconate dehydrogenase, decarboxylating OS=Homo sapiens GN+PGD PE=1 SV=3                                      | AGGAVDFDEK<br>NLLSVAYK<br>VGTGPECCDDWVDGEGAGHVVK                                                                                                                                                                                                | 1<br>2<br>1                                                        | 3.3062<br>7.0837<br>1.6847                                                                                                                      | 3.3062            | 1.1952                                                                                                            | 3             | 4.3206                                                                                                    | 4.9526             | 3.0766             | 4.3202             | 4.3031             | 2.0897     |              |
| AATM_HUMAN  | Aspartate aminotransferase, mitochondrial OS=Homo sapiens GN+GOT2 PE=1 SV=2                                             | ASAEALIGENEIVLK<br>ETSNITIK<br>NLDEKYLPCGGLAEEFC<br>TEGFDTLVAVLEDSK                                                                                                                                                                             | 1<br>2<br>2<br>2                                                   | 5.1365<br>2.1836<br>1.909                                                                                                                       | 5.1365            | 1.844                                                                                                             | 4             | 3.0482                                                                                                    | 2.8476             | 2.8207             | 2.8679             | 2.0242             | 1.5553     |              |
| ACBP_HUMAN  | Acyl-CoA-binding protein OS=Homo sapiens GN+BCI PE=1 SV=2                                                               | QATYQDNTKTERPDLDTQK<br>YVQAGPLRVLVAGK                                                                                                                                                                                                           | 1<br>1                                                             | 3.0995<br>1.7345                                                                                                                                | 3.0995            | 1.7345                                                                                                            | 1             | 3.0995                                                                                                    | 3.0995             | 3.0995             | 3.0995             | 3.0995             | 3.0895     |              |
| ACOC_HUMAN  | Cytoplasmic acorniate hydratase OS=Homo sapiens GN+ACI1 PE=1 SV=3                                                       | YVQAGPLRVLVAGK                                                                                                                                                                                                                                  | 1                                                                  | 1.7345                                                                                                                                          | 1.7345            | 1.7345                                                                                                            | 1             | 7.3345                                                                                                    | 7.3345             | 7.3345             | 7.3345             | 7.3345             | 7.3345     |              |
| ACTA_HUMAN  | Actin, aortic smooth muscle OS=Homo sapiens GN+ACTA2 PE=1 SV=1                                                          | AGAGDADP<br>DLTDLVMK<br>DSYVGDEAGSK<br>EITLAPSTMK<br>GILTK<br>LCYALDFDEMATASSSSLEK                                                                                                                                                              | 2<br>4<br>2<br>4<br>3<br>3                                         | 7.9571<br>6.2071<br>7.4039<br>3.7131<br>3.7088<br>3.3481                                                                                        | 7.9571            | 1.0589<br>1.908<br>1.246<br>1.7053<br>1.2479<br>3.103                                                             | 6             | 5.9208<br>5.7633                                                                                          | 5.618              | 5.4885             | 5.3296             | 1.4477             |            |              |
| ACTB_HUMAN  | Actin, cytoplasmic 1 OS=Homo sapiens GN+ACTB PE=1 SV=1                                                                  | AGAGDADP<br>AVFPSVGRPR<br>DLTDLVMK<br>DSYVGDEAGSK<br>EITLAPSTMK<br>GILTK<br>GYSTTTIAR<br>HQGVMMGMOGK<br>IAPPERK<br>LCYALDFDEMATASSSSLEK<br>QYVDESPPSVHVR<br>VAPEHPHLEAPRNPK                                                                     | 2<br>2<br>2<br>2<br>2<br>2<br>1<br>1<br>1<br>2<br>2                | 7.9571<br>5.7471<br>6.2628<br>7.4039<br>3.7131<br>3.7088<br>6.5826<br>1.3378<br>2.5084<br>3.5452<br>4.9003<br>3.6275                            | 7.9571            | 1.0589<br>1.908<br>1.246<br>1.7053<br>1.2479<br>3.103<br>1.1011<br>1.3378<br>2.5084<br>3.5452<br>4.9003<br>2.2201 | 12            | 5.0254<br>5.3852                                                                                          | 4.5323             | 5.0657             | 4.6376             | 1.682              |            |              |
| ACTC_HUMAN  | Actin, cytoplasmic 2 OS=Homo sapiens GN+ACTC2 PE=1 SV=2                                                                 | DLTDLVMK<br>HQGVMMGMOGK<br>IAPPERK<br>VAPEHPHLEAPRNPK                                                                                                                                                                                           | 1<br>1<br>1<br>1                                                   | 5.2628<br>1.3378<br>2.5084<br>3.6275                                                                                                            | 5.2628            | 1.0872                                                                                                            | 4             | 3.7975                                                                                                    | 5.0358             | 3.2146             | 4.5493             | 4.5423             | 2.0207     |              |
| ACTM_HUMAN  | Beta-actin-like protein 3 OS=Homo sapiens GN+ACTL3 PE=1 SV=1                                                            | QYVDESPPSVHVR                                                                                                                                                                                                                                   | 2                                                                  | 4.9003                                                                                                                                          | 4.9003            | 4.9002                                                                                                            | 1             | 4.9003                                                                                                    | 4.9003             | 4.9002             | 4.9002             | 4.8887             | 4.8887     |              |
| ACTG_HUMAN  | Actin, alpha cardiac muscle 1 OS=Homo sapiens GN+ACT1 PE=1 SV=1                                                         | AGAGDADP<br>AVFPSVGRPR<br>DLTDLVMK<br>EITLAPSTMK<br>GILTK<br>HQGVMMGMOGK<br>IAPPERK<br>LCYALDFDEMATASSSSLEK<br>QYVDESPPSVHVR<br>VAPEHPHLEAPRNPK                                                                                                 | 2<br>2<br>2<br>2<br>2<br>1<br>1<br>2<br>2                          | 7.9571<br>5.7471<br>6.2628<br>7.4039<br>3.7131<br>3.7088<br>6.5826<br>1.3378<br>2.5084<br>3.5452<br>4.9003                                      | 7.9571            | 1.0589<br>1.908<br>1.246<br>1.7053<br>1.2479<br>3.103<br>1.1011<br>1.3378<br>2.5084<br>3.5452<br>4.9003           | 8             | 4.836                                                                                                     | 5.2633             | 4.2539             | 4.7522             | 4.6205             | 1.8118     |              |
| ACTH_HUMAN  | Actin, gamma-enteric smooth muscle OS=Homo sapiens GN+ACTG PE=1 SV=1                                                    | AGAGDADP<br>DLTDLVMK<br>EITLAPSTMK<br>GILTK<br>LCYALDFDEMATASSSSLEK                                                                                                                                                                             | 1<br>1<br>1<br>1<br>3                                              | 8.08<br>1.5378<br>1.962<br>8.2888<br>3.3481                                                                                                     | 8.08              | 1.238                                                                                                             | 6             | 5.3828                                                                                                    | 5.0435             | 4.6012             | 4.3637             | 4.3473             | 1.9688     |              |
| ACTI_HUMAN  | Actin, gamma-enteric smooth muscle OS=Homo sapiens GN+ACTG PE=1 SV=1                                                    | AGAGDADP<br>DLTDLVMK<br>EITLAPSTMK<br>GILTK<br>LCYALDFDEMATASSSSLEK                                                                                                                                                                             | 1<br>1<br>1<br>1<br>3                                              | 8.08<br>1.5378<br>1.962<br>8.2888<br>3.3481                                                                                                     | 8.08              | 1.238                                                                                                             | 6             | 5.3828                                                                                                    | 5.0435             | 4.6012             | 4.3637             | 4.3473             | 1.9688     |              |
| ACTN1_HUMAN | Alpha-actinin-1 OS=Homo sapiens GN+ACTN1 PE=1 SV=2                                                                      | AIMYSSPFHAFSGQAK<br>ASHFEVTDQK<br>CQLENFNLTQK<br>DLLDPAWEK<br>FAGDVSVEYSK<br>GYEWLNER<br>KDDWINDGALTDK<br>CQLEGNHALDFALDK<br>VDTYHNNMGNTPTTPOENGK<br>LALGINVETSK<br>LLETIDGLEYLVK<br>KDKVETALSEK<br>TNEVNDLTK<br>VGVGELTLTAR<br>VLANNENFALMEDEK | 2<br>1<br>1<br>3<br>3<br>1<br>2<br>1<br>1<br>1<br>1<br>1<br>1<br>2 | 3.8878<br>1.6725<br>7.392<br>7.1141<br>5.3681<br>7.5351<br>2.0649<br>4.4902<br>2.5793<br>2.859<br>6.0491<br>2.162<br>4.813<br>8.883<br>4.2489   | 3.8878            | 3.0319                                                                                                            | 2.8286        | 15                                                                                                        | 5.3561             | 5.3225             | 4.9908             | 4.997              | 4.82       | 1.5075       |
| ACTN2_HUMAN | Alpha-actinin-2 OS=Homo sapiens GN+ACTN2 PE=1 SV=1                                                                      | CQLENFNLTQK<br>DLLDPAWEK<br>FAGDVSVEYSK<br>GYEWLNER<br>LEGAGKYVYVNER                                                                                                                                                                            | 1<br>3<br>3<br>1                                                   | 7.392<br>7.1141<br>5.3681<br>7.5351                                                                                                             | 7.392             | 1.599<br>1.599<br>1.599                                                                                           | 6             | 5.8405                                                                                                    | 5.9074             | 4.4201             | 5.13               | 5.0888             | 2.8381     |              |
| ACTN3_HUMAN | Alpha-actinin-3 OS=Homo sapiens GN+ACTN3 PE=1 SV=2                                                                      | CQLENFNLTQK<br>DLLDPAWEK<br>FAGDVSVEYSK                                                                                                                                                                                                         | 1<br>3<br>3                                                        | 7.392<br>7.1141<br>5.3681                                                                                                                       | 7.392             | 1.599<br>1.599<br>1.599                                                                                           | 3             | 6.6247                                                                                                    | 6.4055             | 6.6                | 6.3399             | 6.2745             | 1.1909     |              |
| ACTN4_HUMAN | Alpha-actinin-4 OS=Homo sapiens GN+ACTN4 PE=1 SV=2                                                                      | AIMYSSPFHAFSGQAK<br>ASHFEVTDQK<br>CQLENFNLTQK<br>DLLDPAWEK<br>FAGDVSVEYSK<br>EALAAIK<br>ETTDADVDVAEAFK<br>FAGDVSVEYSK<br>GYEWLNER<br>ISEMNTLEDLSEIK<br>KDDPNNVNAFEWIK<br>LGSNPYTVTPQINSK<br>QFASAVGVFWDTK<br>TNEVNDLTK<br>VGVGELTLTAR<br>8.883  | 2<br>1<br>1<br>3<br>3<br>1<br>1<br>1<br>1<br>1<br>1<br>1<br>1      | 3.8878<br>1.6725<br>7.392<br>7.1141<br>5.3681<br>4.0522<br>2.2989<br>5.3681<br>7.5351<br>2.0649<br>3.8986<br>5.5108<br>2.1432<br>4.813<br>8.883 | 3.8878            | 3.0319                                                                                                            | 2.8286        | 14                                                                                                        | 4.9113             | 5.0846             | 3.9309             | 4.3089             | 3.7596     | 2.4547       |
| ACTS_HUMAN  | Actin, alpha skeletal muscle OS=Homo sapiens GN+ACTA1 PE=1 SV=1                                                         | AGAGDADP<br>AVFPSVGRPR<br>DLTDLVMK<br>DSYVGDEAGSK<br>EITLAPSTMK<br>GILTK<br>HQGVMMGMOGK<br>IAPPERK<br>LCYALDFDEMATASSSSLEK                                                                                                                      | 2<br>2<br>2<br>2<br>2<br>2<br>1<br>1<br>2                          | 7.9571<br>5.7471<br>6.2628<br>7.4039<br>3.7131<br>3.7088<br>6.5826<br>1.3378<br>2.5084<br>3.5452                                                | 7.9571            | 1.0589<br>1.908<br>1.246<br>1.7053<br>1.2479<br>3.103<br>1.1011<br>1.3378<br>2.5084<br>3.5452                     | 9             | 5.0145                                                                                                    | 5.494              | 4.4096             | 5.1179             | 4.9644             | 1.8034     |              |
| ADAM9_HUMAN | Disintegrin and metalloprotease domain-containing protein 9 OS=Homo sapiens GN+ADAM9 PE=1 SV=1                          | DLLDFPVVYVYK<br>QYVDESPPSVHVR                                                                                                                                                                                                                   | 1<br>2                                                             | 1.0628<br>4.9392                                                                                                                                | 1.0628            | 2.082                                                                                                             | 2             | 0.9504                                                                                                    | 0.9504             | 0.9438             | 0.9438             | 0.9438             | 1.8828     |              |
| ADK_HUMAN   | Adenosine kinase OS=Homo sapiens GN+ADK PE=1 SV=2                                                                       | FLEFEVK                                                                                                                                                                                                                                         | 1                                                                  | 0.7746                                                                                                                                          | 0.7746            | 0.7746                                                                                                            | 1             | 0.7746                                                                                                    | 0.7746             | 0.7746             | 0.7746             | 0.7746             | 0.7746     |              |
| AEBP1_HUMAN | Adipocyte enhancer-binding protein 1 OS=Homo sapiens GN+AEBP1 PE=1 SV=1                                                 | GEDEVEEYSEAGTEPDAVFR<br>VLSFDVSTVEIK<br>SISTLDTLR                                                                                                                                                                                               | 1<br>1<br>1                                                        | 4.6305<br>1.4211<br>1.7521                                                                                                                      | 4.6305            | 1.4211                                                                                                            | 1             | 0.7746                                                                                                    | 0.7746             | 0.7746             | 0.7746             | 0.7746             | 2.3054     |              |
| AEBP2_HUMAN | Adipocyte enhancer-binding protein 2 OS=Homo sapiens GN+AEBP2 PE=1 SV=1                                                 | QYVDESPPSVHVR                                                                                                                                                                                                                                   | 2                                                                  | 4.9392                                                                                                                                          | 4.9392            | 4.9392                                                                                                            | 1             | 4.9392                                                                                                    | 4.9392             | 4.9392             | 4.9392             | 4.9392             | 4.9392     |              |
| AGR1_HUMAN  | Agmatase OS=Homo sapiens GN+AGR1 PE=1 SV=4                                                                              | ADDVSGK                                                                                                                                                                                                                                         | 1                                                                  | 1.431                                                                                                                                           | 1.431             | 0.31                                                                                                              | 1             | 1.7021                                                                                                    | 1.7021             | 1.7021             | 1.7021             | 1.7021             | 1.7021     |              |
| AHNK_HUMAN  | Neuroblast differentiation-associated protein AHNAK OS=Homo sapiens GN+AHNAK PE=1 SV=2                                  | AGFDPVAVVYK<br>AGFDPVAVVYK<br>ISMPDNLK<br>ISMPDVLHK<br>VDNARPDVGVGPDVWHLK<br>VDVAPDVAHGPVWHLK                                                                                                                                                   | 1<br>1<br>2<br>1<br>1<br>1                                         | 1.8786<br>2.4798<br>1.6774<br>2.6053<br>1.7108                                                                                                  | 1.8786            | 1.0379                                                                                                            | 6             | 1.9432                                                                                                    | 2.1627             | 1.5727             | 1.7616             | 1.7614             | 2.3266     |              |
| AIBP_HUMAN  | Agonist protein A-1-binding protein OS=Homo sapiens GN+AIBP PE=1 SV=2                                                   | AGFDPVAVVYK                                                                                                                                                                                                                                     | 1                                                                  | 1.8786                                                                                                                                          | 1.8786            | 1.8786                                                                                                            | 1             | 5.1282                                                                                                    | 5.1282             | 5.1282             | 5.1282             | 5.1282             | 5.1282     |              |
| AINP1_HUMAN | Aminoacyl tRNA synthetase complex-interacting multifunctional protein 1 OS=Homo sapiens GN+AINP1 PE=1 SV=2              | CAADADGVK<br>EYQVLLDK                                                                                                                                                                                                                           | 1<br>2                                                             | 2.899<br>4.7829                                                                                                                                 | 2.899             | 1.0732                                                                                                            | 1             | 8.7829                                                                                                    | 8.7829             | 8.7829             | 8.7829             | 8.7829             | 8.7829     |              |
| AINX_HUMAN  | Alpha-interferon OS=Homo sapiens GN+INA PE=1 SV=2                                                                       | EYQVLLDK                                                                                                                                                                                                                                        | 2                                                                  | 4.7829                                                                                                                                          | 8.7662            | 1.0732                                                                                                            | 1             | 8.7829                                                                                                    | 8.7829             | 8.7829             | 8.7829             | 8.7662             | 8.7662     |              |
| AKA1A_HUMAN | Alcohol dehydrogenase (NADP+) OS=Homo sapiens GN+AKA1A PE=1 SV=3                                                        | VDFTFPSEMK                                                                                                                                                                                                                                      | 4                                                                  | 6.6125                                                                                                                                          | 6.6125            | 6.6125                                                                                                            | 1             | 6.6125                                                                                                    | 6.6125             | 6.6125             | 6.6125             | 6.6125             | 6.6125     |              |
| AKA1Z_HUMAN | A-ketase anchor protein 12 OS=Homo sapiens GN+AKA12 PE=1 SV=3                                                           | VELRPFQEGSSEQVPLATEYDEK                                                                                                                                                                                                                         | 2                                                                  | 6.2819                                                                                                                                          | 6.2819            | 2.2919                                                                                                            | 1             | 6.2819                                                                                                    | 6.2819             | 6.2819             | 6.2819             | 6.2819             | 6.2819     |              |
| AL1A1_HUMAN | Retinal dehydrogenase 1 OS=Homo sapiens GN+AL1A1 PE=1 SV=2                                                              | EAQFPNNVYGPYGTAGAASSMDIK<br>IFNNEHDSVSK                                                                                                                                                                                                         | 1<br>1                                                             | 1.1987<br>0.9089                                                                                                                                | 1.1987            | 0.9089                                                                                                            | 6             | 6.2708                                                                                                    | 6.36               | 2.361              | 2.7516             | 2.7009             | 6.0879     |              |



| Accession   | Description                                                          | Protein                        | Start | End     | Score   | Score   | Score   | Score   | Score   | Score   |         |        |        |
|-------------|----------------------------------------------------------------------|--------------------------------|-------|---------|---------|---------|---------|---------|---------|---------|---------|--------|--------|
| CND2_HUMAN  | Cytosolic non-specific dipeptidase OS=Homo sapiens GN=CND2 PE=1 SV=2 | GNLIPGNEAAVTEEIHK              | 1     | 0.3197  | 0.3197  | 2       | 0.3955  | 0.3955  | 0.3882  | 0.3882  | 0.3882  | 1.3158 |        |
| CND2_HUMAN  |                                                                      | MNEVAAADKK                     | 1     | 0.4713  | 0.4713  |         |         |         |         |         |         |        |        |
| CND2_HUMAN  |                                                                      | DITLCLTRMK                     | 2     | 0.8649  | 0.8649  | 1.4614  | 2       | 2.7143  | 2.1378  | 2.092   | 1.6274  | 1.8892 | 2.9021 |
| CND2_HUMAN  |                                                                      | TWIETLQSGPDFDK                 | 1     | 4.4437  | 4.4437  |         |         |         |         |         |         |        |        |
| C01A1_HUMAN | Collagen alpha-1(I) chain OS=Homo sapiens GN=C01A1 PE=1 SV=4         | ALLDGQNEIQR                    | 3     | 12.8164 | 1.9977  | 17.5342 | 20      | 1.0607  | 2.2498  | 0.7408  | 0.8581  | 0.6491 | 3.2986 |
| C01A1_HUMAN |                                                                      | DLEVDTLK                       | 1     | 0.3158  | 0.3158  |         |         |         |         |         |         |        |        |
| C01A1_HUMAN |                                                                      | FTYSVTVGGTSHTGAWGK             | 2     | 0.5673  | 0.5197  | 1.8224  |         |         |         |         |         |        |        |
| C01A1_HUMAN |                                                                      | GEQSGLPK                       | 1     | 0.1371  | 0.1371  |         |         |         |         |         |         |        |        |
| C01A1_HUMAN |                                                                      | GESGSPGPGPTGAG                 | 1     | 0.4054  | 0.4054  |         |         |         |         |         |         |        |        |
| C01A1_HUMAN |                                                                      | GFFGAGVAGPK                    | 1     | 1.8718  | 1.8718  |         |         |         |         |         |         |        |        |
| C01A1_HUMAN |                                                                      | GFSLGDKAK                      | 1     | 2.1592  | 2.1592  |         |         |         |         |         |         |        |        |
| C01A1_HUMAN |                                                                      | GLTSGSPGPGDK                   | 1     | 0.5312  | 0.5312  |         |         |         |         |         |         |        |        |
| C01A1_HUMAN |                                                                      | GNSGRPSQSK                     | 1     | 0.6514  | 0.5514  |         |         |         |         |         |         |        |        |
| C01A1_HUMAN |                                                                      | GPAAGGPR                       | 2     | 1.0636  | 1.073   | 1.2202  |         |         |         |         |         |        |        |
| C01A1_HUMAN |                                                                      | GSEGGVPR                       | 3     | 3.1869  | 2.784   | 2.0566  |         |         |         |         |         |        |        |
| C01A1_HUMAN |                                                                      | GVPGGVAGPAK                    | 1     | 0.8076  | 0.8076  |         |         |         |         |         |         |        |        |
| C01A1_HUMAN |                                                                      | NSVWMDDQTNLKK                  | 2     | 6.2306  | 2.921   | 9.7051  |         |         |         |         |         |        |        |
| C01A1_HUMAN |                                                                      | NSVWMDDQTNLKK                  | 2     | 0.4507  | 0.4438  | 1.2834  |         |         |         |         |         |        |        |
| C01A1_HUMAN |                                                                      | SGRIEETGPGSPGPGVQAR            | 2     | 1.0657  | 1.051   | 1.184   |         |         |         |         |         |        |        |
| C01A1_HUMAN |                                                                      | SSEYWDPNQGNLDMK                | 1     | 0.3427  | 0.3427  |         |         |         |         |         |         |        |        |
| C01A1_HUMAN |                                                                      | SLSDQENR                       | 3     | 0.1597  | 0.1594  | 1.066   |         |         |         |         |         |        |        |
| C01A1_HUMAN |                                                                      | STGGVPSGSPGSPGR                | 1     | 0.2819  | 0.2655  | 1.5385  |         |         |         |         |         |        |        |
| C01A2_HUMAN | Collagen alpha-2(I) chain OS=Homo sapiens GN=C01A2 PE=1 SV=6         | DQNPNDGPGR                     | 1     | 0.4277  | 0.4277  | 25      | 0.0693  | 0.0404  | 0.5757  | 0.5799  | 0.5121  | 2.6706 |        |
| C01A2_HUMAN |                                                                      | DVEYDTLK                       | 1     | 0.1938  | 0.1938  |         |         |         |         |         |         |        |        |
| C01A2_HUMAN |                                                                      | EMATGLAFMR                     | 1     | 0.4346  | 0.4346  |         |         |         |         |         |         |        |        |
| C01A2_HUMAN |                                                                      | FTYTVGGGSK                     | 1     | 0.2794  | 0.2794  |         |         |         |         |         |         |        |        |
| C01A2_HUMAN |                                                                      | GAAGPGKK                       | 3     | 1.5759  | 1.4966  | 1.4817  |         |         |         |         |         |        |        |
| C01A2_HUMAN |                                                                      | GAVGAVGAPGATGDR                | 1     | 0.5399  | 0.5399  |         |         |         |         |         |         |        |        |
| C01A2_HUMAN |                                                                      | GASGNGR                        | 1     | 0.5704  | 0.5704  |         |         |         |         |         |         |        |        |
| C01A2_HUMAN |                                                                      | GDGSPGPMGFGAGAR                | 1     | 0.4597  | 0.4597  |         |         |         |         |         |         |        |        |
| C01A2_HUMAN |                                                                      | GDOGPGVR                       | 1     | 4.8774  | 4.8774  |         |         |         |         |         |         |        |        |
| C01A2_HUMAN |                                                                      | GEAAGAPGAPGR                   | 1     | 0.382   | 0.382   |         |         |         |         |         |         |        |        |
| C01A2_HUMAN |                                                                      | GETPSPGPGVAVGGR                | 1     | 0.4477  | 0.4477  |         |         |         |         |         |         |        |        |
| C01A2_HUMAN |                                                                      | GPRSTLGRPK                     | 1     | 0.711   | 0.711   |         |         |         |         |         |         |        |        |
| C01A2_HUMAN |                                                                      | GHAGLAGAR                      | 2     | 0.8603  | 0.88    | 1.035   |         |         |         |         |         |        |        |
| C01A2_HUMAN |                                                                      | GIPGVDAGATGAR                  | 1     | 0.3222  | 0.3222  |         |         |         |         |         |         |        |        |
| C01A2_HUMAN |                                                                      | GPAAGPGAGK                     | 2     | 1.0479  | 1.045   | 1.1102  |         |         |         |         |         |        |        |
| C01A2_HUMAN |                                                                      | GNPDGAPRPELMDGR                | 1     | 1.2898  | 1.2898  |         |         |         |         |         |         |        |        |
| C01A2_HUMAN |                                                                      | GSPGGPQVK                      | 1     | 2.3116  | 2.3116  |         |         |         |         |         |         |        |        |
| C01A2_HUMAN |                                                                      | GSPGQGR                        | 2     | 0.6438  | 0.6243  | 1.4229  |         |         |         |         |         |        |        |
| C01A2_HUMAN |                                                                      | GVLGAPGMLMGR                   | 4     | 1.9511  | 0.522   | 4.4884  |         |         |         |         |         |        |        |
| C01A2_HUMAN |                                                                      | GVPGQGAR                       | 2     | 0.2443  | 0.2418  | 1.227   |         |         |         |         |         |        |        |
| C01A2_HUMAN |                                                                      | KTNLWVK                        | 1     | 0.7499  | 0.7499  |         |         |         |         |         |         |        |        |
| C01A2_HUMAN |                                                                      | NSAIVMEIETLNKK                 | 2     | 0.1153  | 0.0869  | 2.23    |         |         |         |         |         |        |        |
| C01A2_HUMAN |                                                                      | SAPSRLPK                       | 1     | 0.162   | 0.162   |         |         |         |         |         |         |        |        |
| C01A2_HUMAN |                                                                      | TGHSTVQAGGR                    | 1     | 0.7347  | 0.7347  |         |         |         |         |         |         |        |        |
| C01A2_HUMAN |                                                                      | TIEVK                          | 3     | 0.1107  | 0.109   | 1.2478  |         |         |         |         |         |        |        |
| C02A1_HUMAN | Collagen alpha-1(III) chain OS=Homo sapiens GN=C02A1 PE=1 SV=3       | FTYTLVGGGSK                    | 1     | 0.8305  | 0.8305  | 1       | 0.8305  | 0.8305  | 0.8305  | 0.8305  | 0.8305  | 0.8305 |        |
| C02A1_HUMAN |                                                                      | DGNPSGPR                       | 1     | 0.223   | 0.223   |         |         |         |         |         |         |        |        |
| C02A1_HUMAN |                                                                      | FTYVLEDDGK                     | 3     | 0.6178  | 0.5841  | 1.5285  | 11      | 0.892   | 0.7805  | 0.6506  | 0.6211  | 0.5401 | 2.2716 |
| C02A1_HUMAN |                                                                      | GAGPGGR                        | 1     | 0.5882  | 0.5882  | 1.2811  |         |         |         |         |         |        |        |
| C02A1_HUMAN |                                                                      | GESGAPGAPGAPGR                 | 1     | 1.3594  | 1.3594  |         |         |         |         |         |         |        |        |
| C02A1_HUMAN |                                                                      | GPVSPGSPGK                     | 1     | 3.2707  | 3.2707  |         |         |         |         |         |         |        |        |
| C02A1_HUMAN |                                                                      | GRRSLGAGAR                     | 1     | 0.4687  | 0.4687  |         |         |         |         |         |         |        |        |
| C02A1_HUMAN |                                                                      | INTDEMTLK                      | 2     | 0.6158  | 0.6151  | 1.0649  |         |         |         |         |         |        |        |
| C02A1_HUMAN |                                                                      | SSEYVNSPNDGK                   | 1     | 0.5152  | 0.5018  | 1.3884  |         |         |         |         |         |        |        |
| C02A1_HUMAN |                                                                      | SYNGEELSPPGGR                  | 4     | 0.736   | 0.3915  | 3.7773  |         |         |         |         |         |        |        |
| C02A1_HUMAN |                                                                      | TVEYR                          | 1     | 0.7838  | 0.7838  |         |         |         |         |         |         |        |        |
| C02A1_HUMAN |                                                                      | VFCNMTEGTCSSNPANVLR            | 2     | 0.1597  | 0.1583  | 1.2009  |         |         |         |         |         |        |        |
| C05A2_HUMAN | Collagen alpha-2(V) chain OS=Homo sapiens GN=C05A2 PE=1 SV=3         | GSQFVGDQSPNTAITMFLR            | 2     | 0.6181  | 0.1744  | 15.5031 | 6       | 1.8073  | 1.6091  | 1.2344  | 1.1     | 0.7216 | 2.484  |
| C05A2_HUMAN |                                                                      | NSVWMDDAK                      | 1     | 0.6481  | 0.6481  |         |         |         |         |         |         |        |        |
| C05A2_HUMAN |                                                                      | QSGEYVWPNQGVDAK                | 1     | 1.74    | 1.74    |         |         |         |         |         |         |        |        |
| C05A2_HUMAN |                                                                      | SGLGQVQLMPSGVPVGR              | 1     | 5.2466  | 5.2466  |         |         |         |         |         |         |        |        |
| C05A2_HUMAN |                                                                      | TVEYR                          | 1     | 0.7838  | 0.7838  |         |         |         |         |         |         |        |        |
| C06A1_HUMAN | Collagen alpha-1(V) chain OS=Homo sapiens GN=C06A1 PE=1 SV=3         | DITRLNVLSPGQVYVSGK             | 4     | 0.336   | 0.3373  | 1.8673  | 9       | 0.4504  | 0.4829  | 0.3838  | 0.4105  | 0.3304 | 1.8471 |
| C06A1_HUMAN |                                                                      | ENVAELLEDLFLK                  | 2     | 0.2888  | 0.2783  | 1.4389  |         |         |         |         |         |        |        |
| C06A1_HUMAN |                                                                      | GLELVLSSGSK                    | 1     | 0.1382  | 0.1382  |         |         |         |         |         |         |        |        |
| C06A1_HUMAN |                                                                      | GTYDCAK                        | 1     | 0.328   | 0.328   |         |         |         |         |         |         |        |        |
| C06A1_HUMAN |                                                                      | HUIVTDGR                       | 3     | 0.9864  | 0.597   | 5.2701  |         |         |         |         |         |        |        |
| C06A1_HUMAN |                                                                      | LLFSDGNSQATPAEK                | 2     | 0.2037  | 0.2028  | 1.1387  |         |         |         |         |         |        |        |
| C06A1_HUMAN |                                                                      | NNVEDVCFSECDPR                 | 1     | 0.6082  | 0.6082  |         |         |         |         |         |         |        |        |
| C06A1_HUMAN |                                                                      | SLDQAKNSGTTGALQVTR             | 1     | 0.6817  | 0.6817  |         |         |         |         |         |         |        |        |
| C06A1_HUMAN |                                                                      | YLVVTDGHPLEKPKGLEDANFEAK       | 1     | 0.415   | 0.415   |         |         |         |         |         |         |        |        |
| C06A2_HUMAN | Collagen alpha-2(V) chain OS=Homo sapiens GN=C06A2 PE=1 SV=4         | DIDDLNK                        | 1     | 0.1741  | 0.1741  |         |         |         |         |         |         |        |        |
| C06A2_HUMAN |                                                                      | DYVTVGSDMFEK                   | 1     | 0.489   | 0.489   | 1.2161  | 3       | 0.353   | 0.3895  | 0.3224  | 0.3596  | 0.3679 | 1.7314 |
| C06A2_HUMAN |                                                                      | HESENYSKCDQGR                  | 1     | 0.3858  | 0.3858  |         |         |         |         |         |         |        |        |
| C06A2_HUMAN |                                                                      | AKRGLGAPQLARLR                 | 1     | 0.4885  | 0.4885  |         |         |         |         |         |         |        |        |
| C06A2_HUMAN |                                                                      | ALLVGLR                        | 1     | 0.2889  | 0.2889  |         |         |         |         |         |         |        |        |
| C06A2_HUMAN |                                                                      | DQNPVQK                        | 1     | 11.116  | 11.116  |         |         |         |         |         |         |        |        |
| C06A2_HUMAN |                                                                      | EVTVTR                         | 1     | 0.6855  | 0.6855  |         |         |         |         |         |         |        |        |
| C06A2_HUMAN |                                                                      | FVWGCGGQEK                     | 2     | 1.1395  | 1.3322  | 5.6207  |         |         |         |         |         |        |        |
| C06A2_HUMAN |                                                                      | IEGVPORVLSSGK                  | 1     | 0.4884  | 0.4884  |         |         |         |         |         |         |        |        |
| C06A2_HUMAN |                                                                      | ISLSEYVSVSTR                   | 1     | 0.2828  | 0.2828  |         |         |         |         |         |         |        |        |
| C06A2_HUMAN |                                                                      | ITEVQPLLVITADR                 | 1     | 0.3749  | 0.3749  |         |         |         |         |         |         |        |        |
| C06A2_HUMAN |                                                                      | LUVITGK                        | 1     | 23.6265 | 23.6265 |         |         |         |         |         |         |        |        |
| C06A2_HUMAN |                                                                      | NDSSEVK                        | 1     | 0.4018  | 0.4018  |         |         |         |         |         |         |        |        |
| C06A2_HUMAN |                                                                      | NISSVQSK                       | 1     | 0.5821  | 0.5821  |         |         |         |         |         |         |        |        |
| C06A2_HUMAN |                                                                      | NLQVLTGK                       | 1     | 0.2792  | 0.2792  |         |         |         |         |         |         |        |        |
| C06A2_HUMAN |                                                                      | NNLFTSSQVYR                    | 1     | 0.7513  | 0.7513  |         |         |         |         |         |         |        |        |
| C06A2_HUMAN |                                                                      | QKNCWLEYSR                     | 2     | 0.4515  | 0.4464  | 1.2361  |         |         |         |         |         |        |        |
| C06A2_HUMAN |                                                                      | QLQGGGSLNLSALSYVVAHTFAAGSR     | 1     | 0.5734  | 0.5734  |         |         |         |         |         |         |        |        |
| C06A2_HUMAN |                                                                      | QSLELTPVAPR                    | 1     | 0.5162  | 0.5162  |         |         |         |         |         |         |        |        |
| C06A2_HUMAN |                                                                      | SQAPVLDIR                      | 1     | 0.5008  | 0.5008  |         |         |         |         |         |         |        |        |
| C06A2_HUMAN |                                                                      | SGQVSLGVDIR                    | 1     | 0.6226  | 0.6226  |         |         |         |         |         |         |        |        |
| C06A2_HUMAN |                                                                      | VAVFSDPK                       | 1     | 3.2072  | 3.2072  |         |         |         |         |         |         |        |        |
| C06A2_HUMAN |                                                                      | VERSLTDYSK                     | 2     | 0.8507  | 0.8402  | 1.3228  |         |         |         |         |         |        |        |
| C06A2_HUMAN |                                                                      | VGVDFSDPK                      | 1     | 0.3299  | 0.3299  |         |         |         |         |         |         |        |        |
| C06A2_HUMAN |                                                                      | VGVVDFSDPEFLYK                 | 1     | 0.4071  | 0.4071  |         |         |         |         |         |         |        |        |
| C06A2_HUMAN |                                                                      | VSELVGGQGR                     | 1     | 0.5162  | 0.5162  |         |         |         |         |         |         |        |        |
| C07_HUMAN   | Complement component C7 OS=Homo sapiens GN=C7 PE=1 SV=2              | SFSSSSSSSR                     | 3     | 0.8797  | 0.8799  | 1.08    | 1       | 0.8787  | 0.8787  | 0.8787  | 0.8787  | 0.8789 |        |
| C0A1_HUMAN  | Collagen alpha-1(XI) chain OS=Homo sapiens GN=C0A1 PE=1 SV=2         | ALALGANR                       | 1     | 1.0506  | 1.0506  | 23      | 1.7504  | 1.5829  | 1.272   | 1.1689  | 1.1537  | 2.1571 |        |
| C0A1_HUMAN  |                                                                      | ELSFVEYTSYK                    | 1     | 1.3834  | 1.3834  |         |         |         |         |         |         |        |        |
| C0A1_HUMAN  |                                                                      | GEVTVDTQEVK                    | 1     | 3.8777  | 3.8777  |         |         |         |         |         |         |        |        |
| C0A1_HUMAN  |                                                                      | GSNLTGMAVNR                    | 1     | 0.9656  | 0.9656  |         |         |         |         |         |         |        |        |
| C0A1_HUMAN  |                                                                      | GSNITGDADIVK                   | 1     | 1.0049  | 1.0049  |         |         |         |         |         |         |        |        |
| C0A1_HUMAN  |                                                                      | GSESHCFTGLSPDTGVTVVTPNLEGPGVSK | 2     | 0.5889  | 0.5574  | 1.6049  |         |         |         |         |         |        |        |
| C0A1_HUMAN  |                                                                      | GSPQLVYK                       | 1     | 4.001   | 4.001   |         |         |         |         |         |         |        |        |
| C0A1_HUMAN  |                                                                      | WDLTNLQSK                      | 1     | 3.917   | 3.917   |         |         |         |         |         |         |        |        |
| C0A1_HUMAN  |                                                                      | LGEVLVSPQNTVLEELR              | 1     | 0.9017  | 0.9017  |         |         |         |         |         |         |        |        |
| C0A1_HUMAN  |                                                                      | NFASVGVLELSSPQVAVR             | 1     | 1.1379  | 1.1379  |         |         |         |         |         |         |        |        |
| C0A1_HUMAN  |                                                                      | NLFEDATMENLQETK                | 1     | 1.1881  | 1.1881  |         |         |         |         |         |         |        |        |
| C0A1_HUMAN  |                                                                      | NSVVEFAVVK                     | 1     | 1.1184  | 1.1184  |         |         |         |         |         |         |        |        |
| C0A1_HUMAN  |                                                                      | NTTESGAR                       | 1     | 8.2907  | 8.2907  |         |         |         |         |         |         |        |        |
| C0A1_HUMAN  |                                                                      | NOVDFSLGK                      | 2     | 0.9559  | 0.949   | 1.1863  |         |         |         |         |         |        |        |
| C0A1_HUMAN  |                                                                      | OYDFCLSDGNR                    | 1     | 0.7116  | 0.7116  |         |         |         |         |         |         |        |        |
| C0A1_HUMAN  |                                                                      | SELEIAPSPAEIHTVDFDFAFOR        | 1     | 0.7569  | 0.7569  |         |         |         |         |         |         |        |        |
| C0A1_HUMAN  |                                                                      | SLVDVDTEK                      | 1     | 1.2445  | 1.2445  |         |         |         |         |         |         |        |        |
| C0A1_HUMAN  |                                                                      | TEPNLWYOR                      | 2     | 0.612   | 0.5992  | 1.8402  |         |         |         |         |         |        |        |
| C0A1_HUMAN  |                                                                      | TNWSPAGEVNVYHYK                | 1     | 1.3592  | 1.3592  |         |         |         |         |         |         |        |        |
| C0A1_HUMAN  |                                                                      | TVGLFPONHSHSDVYTR              | 1     | 1.0868  | 1.0868  |         |         |         |         |         |         |        |        |
| C0A1_HUMAN  |                                                                      | TYGWDFVVK                      | 1     | 1.7746  | 1.7746  |         |         |         |         |         |         |        |        |
| C0A1_HUMAN  |                                                                      | VDEIANTPR                      | 3     | 0.9525  | 0.9525  | 1.2952  |         |         |         |         |         |        |        |
| C0A1_HUMAN  |                                                                      | VMLVDTGK                       | 1     | 0.2359  | 0.2359  |         |         |         |         |         |         |        |        |
| C0F1_HUMAN  | Collin-1 OS=Homo sapiens GN=C0F1 PE=1 SV=3                           | AVFLQSEDKK                     | 1     | 11.8534 | 11.8534 | 10      | 11.2236 | 11.6357 | 10.6009 | 10.9153 | 10.8778 | 1.4595 |        |
| C0F1_HUMAN  |                                                                      | ELVGGVSTVDPTAFVK               | 2     | 13.1074 | 12.7215 | 1.4343  |         |         |         |         |         |        |        |

|              |                                                                                       |                                                                                                                                                                                                                                                                |   |         |         |        |   |         |         |         |         |         |         |
|--------------|---------------------------------------------------------------------------------------|----------------------------------------------------------------------------------------------------------------------------------------------------------------------------------------------------------------------------------------------------------------|---|---------|---------|--------|---|---------|---------|---------|---------|---------|---------|
| BDPA_HUMAN   | DNA-binding protein A OS=Homo sapiens GN=CSDA PE=1 SV=4                               | LVGGPDASVEEGRV<br>TQNLNCPYRSDGRK                                                                                                                                                                                                                               | 2 | 2.3629  | 2.1528  | 1.661  |   |         |         |         |         |         |         |
| DCUP_HUMAN   | Uroporphyrinogen decarboxylase OS=Homo sapiens GN=HROD PE=1 SV=2                      | LVGSDTVEFDVVEGR                                                                                                                                                                                                                                                | 1 | 2.847   | 2.847   |        |   | 1       | 2.847   | 2.847   | 2.847   | 2.847   | 2.847   |
| DOX1_HUMAN   | X-ray diffracton protein 1 OS=Homo sapiens GN=DOX1 PE=1 SV=1                          | EAGLAPYIMFAK                                                                                                                                                                                                                                                   | 1 | 3.4702  | 3.4702  |        |   | 1       | 3.4702  | 3.4702  | 3.4702  | 3.4702  | 3.4702  |
| DOX2_HUMAN   | X-ray diffracton protein 2 OS=Homo sapiens GN=DOX2 PE=1 SV=1                          | ELAGQDQAWDDAK                                                                                                                                                                                                                                                  | 1 | 2.781   | 2.781   |        |   | 1       | 2.781   | 2.781   | 2.781   | 2.781   | 2.781   |
| DOX3_HUMAN   | X-ray diffracton protein 3 OS=Homo sapiens GN=DOX3 PE=1 SV=1                          | GLAIVTSDVSEGR                                                                                                                                                                                                                                                  | 1 | 2.921   | 2.921   |        |   | 1       | 2.921   | 2.921   | 2.921   | 2.921   | 2.921   |
| DESM_HUMAN   | Desmin OS=Homo sapiens GN=DESM PE=1 SV=3                                              | DLSLAASLWVK                                                                                                                                                                                                                                                    | 1 | 2.767   | 2.767   |        |   | 1       | 2.767   | 2.767   | 2.767   | 2.767   | 2.767   |
| DESL_HUMAN   | Desmin OS=Homo sapiens GN=DESL PE=1 SV=3                                              | EIVQDLNPK<br>KLEEGEER<br>LLEGEER                                                                                                                                                                                                                               | 4 | 8.7629  | 8.762   | 1.0732 | 5 | 8.0263  | 7.7287  | 7.8398  | 7.504   | 7.3978  | 1.2033  |
|              |                                                                                       | TKNEVELADNR<br>VELELNDR                                                                                                                                                                                                                                        | 3 | 4.9536  | 4.7442  |        |   |         |         |         |         |         | 1.4416  |
|              |                                                                                       |                                                                                                                                                                                                                                                                | 1 | 8.7321  | 8.7321  |        |   |         |         |         |         |         |         |
| DEST_HUMAN   | Desmin OS=Homo sapiens GN=DEST PE=1 SV=3                                              | MYASSS                                                                                                                                                                                                                                                         | 1 | 11.2438 | 11.2438 |        |   | 1       | 11.2438 | 11.2438 | 11.2438 | 11.2438 | 11.2438 |
| DIKC1_HUMAN  | Dickkopf-related protein 1 OS=Homo sapiens GN=DIKC1 PE=1 SV=1                         | DORSFELPR<br>DSECCDDGLVWGHCKT<br>EVELMDKTK<br>LLDTLWELFEGALDR<br>GELFLDR                                                                                                                                                                                       | 2 | 1.6387  | 1.651   | 2.795  | 6 | 0.8739  | 0.8256  | 0.8592  | 0.8109  | 0.7663  | 1.2356  |
|              |                                                                                       | SWEMERFAAAK                                                                                                                                                                                                                                                    | 1 | 0.9693  | 0.9693  |        |   |         |         |         |         |         |         |
| DLRB1_HUMAN  | Dynein light chain roadblock-type 1 OS=Homo sapiens GN=DYLRB1 PE=1 SV=3               | SDMNPFTQYVSLMFLK                                                                                                                                                                                                                                               | 1 | 0.363   | 0.363   |        |   | 1       | 0.363   | 0.363   | 0.363   | 0.363   | 0.363   |
| DNRB1_HUMAN  | DNA homology subfamily B member 4 OS=Homo sapiens GN=DNRB1 PE=1 SV=1                  | ETDFGEEGLK                                                                                                                                                                                                                                                     | 1 | 0.3469  | 0.3469  |        |   | 1       | 0.3469  | 0.3469  | 0.3469  | 0.3469  | 0.3469  |
| DNCH2_HUMAN  | DNA homology subfamily C member 1 OS=Homo sapiens GN=DNCH2 PE=1 SV=1                  | ISLFDGKFLK                                                                                                                                                                                                                                                     | 1 | 1.3538  | 1.3538  |        |   | 1       | 1.3538  | 1.3538  | 1.3538  | 1.3538  | 1.3538  |
| DPYL2_HUMAN  | Dihydropyrimidinase-related protein 2 OS=Homo sapiens GN=DPYL2 PE=1 SV=1              | GLVDGPVCEVYVTK<br>GSLWVYDZGK                                                                                                                                                                                                                                   | 1 | 3.9131  | 3.9131  |        | 2 | 1.9792  | 1.9792  | 0.421   | 0.421   | 0.421   | 23.4623 |
| DPY1.3_HUMAN | Dihydropyrimidinase-related protein 3 OS=Homo sapiens GN=DPY1.3 PE=1 SV=1             | GMIVYDFGDTTK<br>GSLWVYDZGK                                                                                                                                                                                                                                     | 1 | 0.0453  | 0.0453  |        |   | 1       | 0.0207  | 0.0207  | 0.0207  | 0.0207  | 0.0207  |
| DYH2_HUMAN   | Dynein heavy chain 2, axonemal OS=Homo sapiens GN=DYH2 PE=1 SV=3                      | QELLAAQK                                                                                                                                                                                                                                                       | 1 | 14.6207 | 14.6207 |        |   | 1       | 14.6207 | 14.6207 | 14.6207 | 14.6207 | 14.6207 |
| DYH1C1_HUMAN | Cytoskeletal dynein 1 heavy chain 1 OS=Homo sapiens GN=DYH1C1 PE=1 SV=3               | QLNSLAAASGGAK                                                                                                                                                                                                                                                  | 1 | 0.6258  | 0.6258  |        |   | 1       | 0.6258  | 0.6258  | 0.6258  | 0.6258  | 0.6258  |
| DYSL_HUMAN   | Dysferlin OS=Homo sapiens GN=DYSL PE=1 SV=1                                           | ELAKMK                                                                                                                                                                                                                                                         | 1 | 1.8295  | 1.8295  |        |   | 1       | 1.8295  | 1.8295  | 1.8295  | 1.8295  | 1.8295  |
| ECHM_HUMAN   | Enoyl-CoA hydratase, mitochondrial OS=Homo sapiens GN=ECHM1 PE=1 SV=4                 | ALNALCGDIDENLAK<br>DLTNGR<br>LWVEAKSR<br>NVALVSGTENAK<br>VTNMLLSGAGSR                                                                                                                                                                                          | 1 | 0.3317  | 0.3317  |        |   | 1       | 0.3317  | 0.3317  | 0.3317  | 0.3317  | 0.3317  |
|              |                                                                                       | DMTSPYVSKR                                                                                                                                                                                                                                                     | 2 | 2.3302  | 0.8189  | 1.4537 | 4 | 0.7804  | 0.684   | 0.6863  | 0.596   | 0.5865  | 1.7365  |
|              |                                                                                       | QSDAIVDNRKPHPSHSDYPPFLR                                                                                                                                                                                                                                        | 1 | 0.967   | 0.967   |        |   |         |         |         |         |         |         |
|              |                                                                                       | STTGLHLK<br>THNVWVHVSZGK                                                                                                                                                                                                                                       | 2 | 2.7297  | 2.7108  | 1.0814 | 2 | 1.5484  | 1.4844  | 3.8554  | 4.3118  | 3.3251  | 3.7588  |
|              |                                                                                       | THNVWVHVSZGK                                                                                                                                                                                                                                                   | 1 | 2.7297  | 2.7108  | 1.0814 | 2 | 1.5484  | 1.4844  | 3.8554  | 4.3118  | 3.3251  | 3.7588  |
|              |                                                                                       | THNVWVHVSZGK                                                                                                                                                                                                                                                   | 1 | 3.4284  | 3.4284  |        |   |         |         |         |         |         |         |
| EF1A2_HUMAN  | Elongation factor 1-alpha 2 OS=Homo sapiens GN=EF1A2 PE=1 SV=1                        | STTGLHLK                                                                                                                                                                                                                                                       | 1 | 3.4284  | 3.4284  |        | 2 | 2.1778  | 2.1778  | 1.2156  | 2       | 5.353   | 5.9952  |
| EF1A3_HUMAN  | Elongation factor 1-alpha like 3 OS=Homo sapiens GN=EF1A3 PE=1 SV=1                   | EVSTYK<br>QTWVWQK                                                                                                                                                                                                                                              | 1 | 8.905   | 8.905   |        |   | 2       | 7.4838  | 7.4838  | 7.1496  | 7.1496  | 7.1496  |
| EF1B_HUMAN   | Elongation factor 1-beta OS=Homo sapiens GN=EF1B PE=1 SV=1                            | SPAGLQVLDLAK                                                                                                                                                                                                                                                   | 2 | 12.7719 | 12.6769 | 1.6889 | 1 | 12.7719 | 12.7719 | 12.7719 | 12.7719 | 12.7719 | 12.7719 |
| EF1D_HUMAN   | Elongation factor 1-delta OS=Homo sapiens GN=EF1D PE=1 SV=5                           | GVVDEQLQSK<br>LSDQLDQWSK                                                                                                                                                                                                                                       | 1 | 8.9371  | 8.9371  |        |   | 2       | 8.9294  | 8.7268  | 8.9086  | 8.7085  | 7.9445  |
| EF1G_HUMAN   | Elongation factor 1-gamma OS=Homo sapiens GN=EF1G PE=1 SV=3                           | AWLGEK<br>ILGLDWK<br>VSNEDTLVSLPVFWEFK                                                                                                                                                                                                                         | 2 | 0.0442  | 0.044   | 1.148  | 3 | 4.6272  | 4.1007  | 1.2827  | 0.907   | 0.8047  | 18.4898 |
|              |                                                                                       |                                                                                                                                                                                                                                                                | 1 | 1.6294  | 1.6294  | 1.1198 | 1 | 1.6294  | 1.6294  | 1.6294  | 1.6294  | 1.6294  | 1.6294  |
| EF2_HUMAN    | Elongation factor 2 OS=Homo sapiens GN=EF2 PE=1 SV=4                                  | EGPGLDNLAK<br>ETVSDNVALSK<br>GLPLMYSK<br>GVLNLR<br>IWCFRPFQIPNALDTIK<br>STLTLVSK<br>TFGLDLPFK<br>VFDAMFK<br>VFSGLVSK<br>VQISLTVLWAK                                                                                                                            | 3 | 8.733   | 8.5884  | 4.5058 | 9 | 8.7323  | 8.9149  | 7.8102  | 8.1825  | 8.0752  | 1.6529  |
|              |                                                                                       | ETVSDNVALSK                                                                                                                                                                                                                                                    | 1 | 5.4165  | 5.4165  |        |   | 1       | 0.2106  | 0.2106  | 0.2106  | 0.2106  | 0.2106  |
|              |                                                                                       | GLPLMYSK                                                                                                                                                                                                                                                       | 1 | 6.3063  | 6.3063  |        |   | 1       | 0.2106  | 0.2106  | 0.2106  | 0.2106  | 0.2106  |
|              |                                                                                       | GVLNLR                                                                                                                                                                                                                                                         | 1 | 9.3412  | 9.3412  |        |   | 1       | 0.2106  | 0.2106  | 0.2106  | 0.2106  | 0.2106  |
|              |                                                                                       | IWCFRPFQIPNALDTIK                                                                                                                                                                                                                                              | 1 | 10.8227 | 10.7771 | 1.2613 |   |         |         |         |         |         |         |
|              |                                                                                       | STLTLVSK                                                                                                                                                                                                                                                       | 1 | 3.1293  | 3.1293  |        |   |         |         |         |         |         |         |
|              |                                                                                       | TFGLDLPFK                                                                                                                                                                                                                                                      | 1 | 19.2739 | 19.2739 |        |   |         |         |         |         |         |         |
|              |                                                                                       | VFDAMFK                                                                                                                                                                                                                                                        | 1 | 6.8844  | 6.8844  |        |   |         |         |         |         |         |         |
|              |                                                                                       | VFSGLVSK                                                                                                                                                                                                                                                       | 1 | 7.873   | 7.873   |        |   |         |         |         |         |         |         |
|              |                                                                                       | VQISLTVLWAK                                                                                                                                                                                                                                                    | 1 | 0.2106  | 0.2106  |        |   | 1       | 0.2106  | 0.2106  | 0.2106  | 0.2106  | 0.2106  |
|              |                                                                                       | VDPDLMLK                                                                                                                                                                                                                                                       | 1 | 0.2106  | 0.2106  |        |   | 1       | 0.2106  | 0.2106  | 0.2106  | 0.2106  | 0.2106  |
|              |                                                                                       | GVNTYSZGK                                                                                                                                                                                                                                                      | 1 | 2.2311  | 2.2311  |        |   | 1       | 2.2311  | 2.2311  | 2.2311  | 2.2311  | 2.2311  |
|              |                                                                                       | DMGLDGLLSEAK                                                                                                                                                                                                                                                   | 2 | 2.7313  | 2.738   | 0.2056 | 1 | 2.7313  | 2.7313  | 2.7313  | 2.7313  | 2.7313  | 2.738   |
|              |                                                                                       | LKYDDLQDGK                                                                                                                                                                                                                                                     | 1 | 2.0472  | 2.0472  |        |   | 1       | 2.0472  | 2.0472  | 2.0472  | 2.0472  | 2.0472  |
|              |                                                                                       | GLEGGADAGGCPVSEGR                                                                                                                                                                                                                                              | 1 | 1.758   | 1.758   |        |   | 3       | 2.3859  | 2.3859  | 2.3324  | 2.3324  | 2.3324  |
|              |                                                                                       | LWVSLHVEAKSR                                                                                                                                                                                                                                                   | 1 | 2.451   | 2.451   |        |   |         |         |         |         |         |         |
|              |                                                                                       | DATLGEVSEGR                                                                                                                                                                                                                                                    | 1 | 2.9875  | 2.9875  |        |   |         |         |         |         |         |         |
| ENO1_HUMAN   | Alpha-enolase OS=Homo sapiens GN=ENO1 PE=1 SV=2                                       | DATNVGDEGFPANLKK<br>DYPVSEIDFDDQWAWK<br>EGSLIK<br>FGANILVSJAVK<br>FTSHGQVVDGLVFNPK<br>GNPVVELDTSK<br>HADLAGNSEVLVPAFNVNNGSGHAGNK<br>DQKLMENDDSK<br>IEELSSK<br>IQAEVYK<br>KLNVTQEK<br>LMEQGTENK<br>SFKIDYVWSEDFDDQWAWK<br>TAPVALSK<br>VWQDSEFELGAK<br>VSPDADLVK | 1 | 22.4692 | 22.4692 |        |   |         |         |         |         |         |         |
|              |                                                                                       |                                                                                                                                                                                                                                                                | 1 | 10.4426 | 10.4426 |        |   |         |         |         |         |         |         |
|              |                                                                                       |                                                                                                                                                                                                                                                                | 1 | 11.949  | 11.9298 | 1.9884 |   |         |         |         |         |         |         |
|              |                                                                                       |                                                                                                                                                                                                                                                                | 2 | 3.7893  | 3.7135  | 2.4883 | 5 | 4.2827  | 3.9734  | 3.0625  | 3.2811  | 2.1172  | 2.7765  |
|              |                                                                                       |                                                                                                                                                                                                                                                                | 1 | 0.6024  | 0.6024  | 0.0376 |   |         |         |         |         |         |         |
|              |                                                                                       |                                                                                                                                                                                                                                                                | 1 | 10.1938 | 10.1938 |        |   |         |         |         |         |         |         |
|              |                                                                                       |                                                                                                                                                                                                                                                                | 3 | 3.7287  | 1.5621  | 7.6505 | 3 | 12.8125 | 14.8943 | 9.7092  | 11.1898 | 10.7259 | 2.523   |
|              |                                                                                       |                                                                                                                                                                                                                                                                | 2 | 3.7893  | 3.7135  | 2.4883 | 3 | 12.8125 | 14.8943 | 9.7092  | 11.1898 | 10.7259 | 2.523   |
|              |                                                                                       |                                                                                                                                                                                                                                                                | 1 | 23.8846 | 22.126  | 1.8547 |   |         |         |         |         |         |         |
|              |                                                                                       |                                                                                                                                                                                                                                                                | 1 | 6.1181  | 6.1181  |        |   |         |         |         |         |         |         |
|              |                                                                                       |                                                                                                                                                                                                                                                                | 1 | 5.7296  | 5.7296  |        |   |         |         |         |         |         |         |
|              |                                                                                       |                                                                                                                                                                                                                                                                | 2 | 22.342  | 21.2023 | 1.5988 |   |         |         |         |         |         |         |
|              |                                                                                       |                                                                                                                                                                                                                                                                | 1 | 20.5447 | 20.5447 |        |   |         |         |         |         |         |         |
|              |                                                                                       |                                                                                                                                                                                                                                                                | 1 | 21.7022 | 21.7022 |        |   |         |         |         |         |         |         |
|              |                                                                                       |                                                                                                                                                                                                                                                                | 3 | 12.769  | 4.486   | 12.214 |   |         |         |         |         |         |         |
|              |                                                                                       |                                                                                                                                                                                                                                                                | 4 | 12.6052 | 11.7238 | 1.8833 |   |         |         |         |         |         |         |
|              |                                                                                       |                                                                                                                                                                                                                                                                | 2 | 1.8483  | 0.8955  | 2.8885 |   |         |         |         |         |         |         |
|              |                                                                                       |                                                                                                                                                                                                                                                                | 3 | 24.2737 | 22.4347 | 1.6677 |   |         |         |         |         |         |         |
| ENO3_HUMAN   | Beta-enolase OS=Homo sapiens GN=ENO3 PE=1 SV=4                                        | FGANILVSJAVK<br>HADLAGNPVLVPAFNVNNGSGHAGNK<br>LAQSGWGVMSR<br>SQETEDTDVVLVGLDQSK<br>VWQDSEFELGAK                                                                                                                                                                | 2 | 3.7893  | 3.7135  | 2.4883 | 5 | 4.2827  | 3.9734  | 3.0625  | 3.2811  | 2.1172  | 2.7765  |
|              |                                                                                       |                                                                                                                                                                                                                                                                | 2 | 1.6274  | 1.6274  | 0.0376 |   |         |         |         |         |         |         |
|              |                                                                                       |                                                                                                                                                                                                                                                                | 1 | 10.1938 | 10.1938 |        |   |         |         |         |         |         |         |
|              |                                                                                       |                                                                                                                                                                                                                                                                | 3 | 3.7287  | 1.5621  | 7.6505 | 3 | 12.8125 | 14.8943 | 9.7092  | 11.1898 | 10.7259 | 2.523   |
|              |                                                                                       |                                                                                                                                                                                                                                                                | 2 | 3.7893  | 3.7135  | 2.4883 | 3 | 12.8125 | 14.8943 | 9.7092  | 11.1898 | 10.7259 | 2.523   |
|              |                                                                                       |                                                                                                                                                                                                                                                                | 1 | 23.8846 | 22.126  | 1.8547 |   |         |         |         |         |         |         |
|              |                                                                                       |                                                                                                                                                                                                                                                                | 1 | 10.1938 | 10.1938 |        |   |         |         |         |         |         |         |
| ENP1_HUMAN   | Endoplasmic reticulum protein 1 OS=Homo sapiens GN=ENP1 PE=1 SV=1                     | ELNSADLQK                                                                                                                                                                                                                                                      | 3 | 0.0731  | 0.0975  | 1.6362 | 1 | 0.0731  | 0.0731  | 0.0731  | 0.0731  | 0.0731  | 0.3975  |
| EPOR_HUMAN   | Erythropoietin receptor OS=Homo sapiens GN=EPOR PE=1 SV=1                             | EFLSGLDLQSK                                                                                                                                                                                                                                                    | 2 | 8.4092  | 8.4092  | 2.7983 |   | 1       | 8.4092  | 8.4092  | 8.4092  | 8.4092  | 8.4092  |
| ERF1_HUMAN   | Eukaryotic peptide chain release factor subunit 1 OS=Homo sapiens GN=ERF1 PE=1 SV=3   | VWVLGVAAGADFK<br>YDESDQVTK                                                                                                                                                                                                                                     | 1 | 0.626   | 0.626   |        |   | 2       | 0.4279  | 0.4279  | 0.1566  | 0.1566  | 0.5007  |
| ERH1_HUMAN   | Enhancer of rudimentary hornless OS=Homo sapiens GN=ERH1 PE=1 SV=1                    | ADTQGLPK                                                                                                                                                                                                                                                       | 1 | 1.718   | 1.718   |        |   | 1       | 1.718   | 1.718   | 1.718   | 1.718   | 1.718   |
| ESY3_HUMAN   | Extended synaptotagmin-3 OS=Homo sapiens GN=ESY3 PE=2 SV=2                            | VWVQDQK                                                                                                                                                                                                                                                        | 2 | 0.0423  | 0.0423  | 0.9911 | 1 | 0.0423  | 0.0423  | 0.0423  | 0.0423  | 0.0423  | 0.0423  |
| EVS_HUMAN    | Electrocyte viral integration site 5 protein homolog OS=Homo sapiens GN=EVS PE=1 SV=2 | QMALELQK                                                                                                                                                                                                                                                       | 2 | 0.9227  | 0.913   | 1.283  | 1 | 0.9227  | 0.9227  | 0.9227  | 0.9227  | 0.9227  | 0.913   |
| EWK_HUMAN    | Ewing sarcoma breakpoint region 1 OS=Homo sapiens GN=EWK PE=1 SV=1                    | AKMREGLQK                                                                                                                                                                                                                                                      | 2 | 0.4533  | 0.4533  |        |   | 1       | 0.4533  | 0.4533  | 0.4533  | 0.4533  | 0.4533  |
| EZR1_HUMAN   | Ezrin OS=Homo sapiens GN=EZR1 PE=1 SV=4                                               | DNALMELK<br>LFLQWK<br>QLEFDQK                                                                                                                                                                                                                                  | 1 | 3.1187  | 3.1187  |        | 3 | 8.4034  | 6.0437  | 5.643   | 5.4078  | 5.3195  | 1.9033  |
|              |                                                                                       |                                                                                                                                                                                                                                                                | 1 | 11.127  | 11.127  | 1.4404 |   |         |         |         |         |         |         |
|              |                                                                                       |                                                                                                                                                                                                                                                                | 2 | 0.9645  | 0.8038  | 1.4404 |   |         |         |         |         |         |         |
| F10A1_HUMAN  | Hc70-interacting protein OS=Homo sapiens GN=F10A1 PE=1 SV=2                           | ADLFTDAK<br>EVVESMGK<br>LDVDEASAMK<br>WVAALNDGELQK                                                                                                                                                                                                             | 2 | 2.0856  | 2.011   | 1.3891 | 4 | 4.6488  | 4.1322  | 2.1983  | 2.1695  | 2.1464  | 5.5563  |
|              |                                                                                       |                                                                                                                                                                                                                                                                | 1 | 1.2117  | 1.2117  |        |   |         |         |         |         |         |         |
|              |                                                                                       |                                                                                                                                                                                                                                                                | 1 | 4.5042  | 4.5042  |        |   |         |         |         |         |         |         |
|              |                                                                                       |                                                                                                                                                                                                                                                                |   |         |         |        |   |         |         |         |         |         |         |

|             |                                                                                            |                                  |   |         |         |  |   |        |        |        |        |        |        |
|-------------|--------------------------------------------------------------------------------------------|----------------------------------|---|---------|---------|--|---|--------|--------|--------|--------|--------|--------|
|             |                                                                                            | ILYLTNDNAR                       | 1 | 1,3523  | 1,3523  |  |   |        |        |        |        |        |        |
|             |                                                                                            | LQVRFPSGGGAPR                    | 1 | 1,0318  | 1,0318  |  |   |        |        |        |        |        |        |
|             |                                                                                            | QYWGSPVSK                        | 3 | 0,9148  | 0,9068  |  |   |        |        | 1,735  |        |        |        |
|             |                                                                                            | SDTVSPR                          | 2 | 0,6492  | 0,644   |  |   |        |        | 1,1973 |        |        |        |
|             |                                                                                            | SERLRK                           | 3 | 1,0229  | 1,0208  |  |   |        |        | 1,0797 |        |        |        |
|             |                                                                                            | STTRPGTVYR                       | 4 | 0,8604  | 0,8539  |  |   |        |        | 1,1571 |        |        |        |
|             |                                                                                            | SYTITGLSPTDVK                    | 1 | 1,4466  | 1,4466  |  |   |        |        |        |        |        |        |
|             |                                                                                            | TYVSCCTEGR                       | 2 | 1,2365  | 1,2296  |  |   |        |        | 1,1612 |        |        |        |
|             |                                                                                            | TYVYEQDVK                        | 1 | 1,2062  | 1,2062  |  |   |        |        |        |        |        |        |
|             |                                                                                            | VDVFNALDEPHGQR                   | 1 | 1,3004  | 1,3004  |  |   |        |        |        |        |        |        |
|             |                                                                                            | VFAVSHGR                         | 2 | 0,8899  | 0,8899  |  |   |        |        | 1,0011 |        |        |        |
|             |                                                                                            | YEFGSPR                          | 1 | 0,8653  | 0,8653  |  |   |        |        |        |        |        |        |
|             |                                                                                            | YEVSVYAK                         | 4 | 1,2828  | 1,2469  |  |   |        |        | 1,2001 |        |        |        |
|             |                                                                                            | YIGYNYR                          | 1 | 0,95    | 0,95    |  |   |        |        |        |        |        |        |
| FKBP3_HUMAN | FKBP3-binding protein 3 OS=Homo sapiens GN=FKBP3 PE=1 SV=1                                 | FLEIQRSSLLAGIK                   | 1 | 3,3157  | 3,3157  |  |   |        |        |        |        |        |        |
|             |                                                                                            | LEIEPWAYGK                       | 2 | 3,292   | 3,2212  |  | 2 | 3,3039 | 3,2999 | 3,3038 | 3,2999 | 3,2524 | 1,0051 |
| FLNA_HUMAN  | Flamin-A OS=Homo sapiens GN=FLNA PE=1 SV=4                                                 | AGNMILVGVHGR                     | 1 | 1,3788  | 1,3788  |  |   |        |        |        |        | 2,5616 | 2,5298 |
|             |                                                                                            | AHWYPCDASK                       | 1 | 0,9524  | 0,9524  |  |   |        |        |        |        |        |        |
|             |                                                                                            | AWSPGLEGVGSK                     | 1 | 1,9495  | 1,9495  |  |   |        |        |        |        |        |        |
|             |                                                                                            | AWGSEFPGDAWK                     | 1 | 0,9959  | 0,9959  |  |   |        |        |        |        |        |        |
|             |                                                                                            | DGSCGVAVYVQEPGEYEVYK             | 1 | 1,5003  | 1,5003  |  |   |        |        |        |        |        |        |
|             |                                                                                            | DLAEDAPVK                        | 2 | 1,7257  | 1,2316  |  |   |        |        |        | 3,4138 |        |        |
|             |                                                                                            | DVIDEHDNTYVK                     | 1 | 0,6063  | 0,6063  |  |   |        |        |        |        |        |        |
|             |                                                                                            | EATFERSVIAR                      | 1 | 0,4714  | 0,4714  |  |   |        |        |        |        |        |        |
|             |                                                                                            | FVPMEMTIVVSK                     | 1 | 0,8186  | 0,8186  |  |   |        |        |        |        |        |        |
|             |                                                                                            | OKLVDQFSGLTG                     | 1 | 0,5789  | 0,5789  |  |   |        |        |        |        |        |        |
|             |                                                                                            | LDVDFSGLTG                       | 1 | 1,822   | 1,822   |  |   |        |        |        |        |        |        |
|             |                                                                                            | LMLLVLSOK                        | 2 | 7,8455  | 7,845   |  |   |        |        |        |        | 1,0155 |        |
|             |                                                                                            | LTVSSLQESGLK                     | 1 | 3,2896  | 3,2896  |  |   |        |        |        |        |        |        |
|             |                                                                                            | LVSSDK                           | 2 | 3,2896  | 3,2843  |  |   |        |        |        |        | 1,0835 |        |
|             |                                                                                            | LVSYLYLK                         | 1 | 5,5256  | 5,5256  |  |   |        |        |        |        |        |        |
|             |                                                                                            | NNDNFYTK                         | 1 | 6,1431  | 6,1431  |  |   |        |        |        |        |        |        |
|             |                                                                                            | SAGQGVLYYVDERNGHDEAK             | 2 | 4,8938  | 4,8985  |  |   |        |        |        |        | 1,3211 |        |
|             |                                                                                            | SPFEYVYVK                        | 1 | 3,0788  | 3,0788  |  |   |        |        |        |        |        |        |
|             |                                                                                            | SPFVWVPSLGLSK                    | 2 | 2,1324  | 2,1249  |  |   |        |        |        |        | 1,126  |        |
|             |                                                                                            | VEYTYEGLHSDVYTVSPPVSPFPVPTGECDSR | 1 | 0,9143  | 0,9143  |  |   |        |        |        |        |        |        |
|             |                                                                                            | VTAGGPLESPGNMVK                  | 1 | 4,2074  | 4,2074  |  |   |        |        |        |        |        |        |
| FLNB_HUMAN  | Flamin-B OS=Homo sapiens GN=FLNB PE=1 SV=1                                                 | AETLVK                           | 2 | 1,6539  | 1,6537  |  |   |        |        |        |        |        |        |
|             |                                                                                            | ALGALVDSCAPGLCPVWSDVMPQKPVNAR    | 1 | 3,7527  | 3,7527  |  |   |        |        |        |        |        |        |
|             |                                                                                            | DAHQVDFVGFVSK                    | 1 | 5,8511  | 5,8511  |  |   |        |        |        |        |        |        |
|             |                                                                                            | DLAEDAPVK                        | 2 | 1,7257  | 1,2316  |  |   |        |        |        |        | 3,4138 |        |
|             |                                                                                            | DLIDINDYSHIVTK                   | 1 | 14,1455 | 14,1455 |  |   |        |        |        |        |        |        |
|             |                                                                                            | EAGAGLGLSVAIGPQSK                | 2 | 3,2295  | 3,0224  |  |   |        |        |        |        | 1,6815 |        |
|             |                                                                                            | GAGTGLGLTEVGPCAEK                | 1 | 6,2301  | 6,2301  |  |   |        |        |        |        |        |        |
|             |                                                                                            | GDYVLAK                          | 2 | 2,2255  | 2,2244  |  |   |        |        |        |        | 1,0247 |        |
|             |                                                                                            | GEPTDNVVK                        | 1 | 4,873   | 4,873   |  |   |        |        |        |        |        |        |
|             |                                                                                            | IEYNNDQSDGVVSK                   | 1 | 4,8489  | 4,8489  |  |   |        |        |        |        |        |        |
|             |                                                                                            | LMLLVLSOK                        | 2 | 7,8455  | 7,845   |  |   |        |        |        |        | 1,0155 |        |
|             |                                                                                            | LTVSSLQESGLK                     | 1 | 5,2021  | 4,4845  |  |   |        |        |        |        | 2,5967 |        |
|             |                                                                                            | LVSSDK                           | 2 | 3,2896  | 3,2843  |  |   |        |        |        |        | 1,0835 |        |
|             |                                                                                            | MDGYACYPVVK                      | 1 | 8,1619  | 8,1619  |  |   |        |        |        |        |        |        |
|             |                                                                                            | TFEMSPFVTR                       | 1 | 0,3217  | 0,3217  |  |   |        |        |        |        |        |        |
|             |                                                                                            | WQVFNWTRSR                       | 1 | 12,3268 | 12,3268 |  |   |        |        |        |        |        |        |
|             |                                                                                            | VLOSFTVDSK                       | 1 | 3,9312  | 3,9312  |  |   |        |        |        |        |        |        |
|             |                                                                                            | VLSDEEEDFQDIIHANNQITFTVK         | 1 | 4,5079  | 4,5079  |  |   |        |        |        |        |        |        |
|             |                                                                                            | VTEAENVPMVK                      | 1 | 11,9178 | 11,9178 |  |   |        |        |        |        |        |        |
|             |                                                                                            | YMGVTVGSDPLSPR                   | 1 | 7,0754  | 7,0754  |  |   |        |        |        |        |        |        |
| FLNC_HUMAN  | Flamin-C OS=Homo sapiens GN=FLNC PE=1 SV=3                                                 | AFQPKLEFDGFWPELLEIEMAR           | 1 | 1,453   | 1,452   |  |   |        |        |        |        |        |        |
|             |                                                                                            | AWSPGLETVGSK                     | 1 | 1,0833  | 1,0833  |  |   |        |        |        |        |        |        |
|             |                                                                                            | DAGEGLLTVLDPEQPK                 | 1 | 2,3912  | 2,3912  |  |   |        |        |        |        |        |        |
|             |                                                                                            | DREIHDNRYTVK                     | 1 | 1,302   | 1,302   |  |   |        |        |        |        |        |        |
|             |                                                                                            | DLAEDAPVK                        | 2 | 1,7257  | 1,2316  |  |   |        |        |        |        | 3,4138 |        |
|             |                                                                                            | EAGAGLGLSVAIGPQSK                | 2 | 3,2295  | 3,0224  |  |   |        |        |        |        | 1,6815 |        |
|             |                                                                                            | GAGTGLGLTEVGPCAEK                | 1 | 6,2301  | 6,2301  |  |   |        |        |        |        |        |        |
|             |                                                                                            | LMLLVLSOK                        | 2 | 7,8455  | 7,845   |  |   |        |        |        |        | 1,0155 |        |
|             |                                                                                            | LVSSDK                           | 2 | 3,2896  | 3,2843  |  |   |        |        |        |        | 1,0835 |        |
|             |                                                                                            | LYAQDQCGPIDK                     | 1 | 1,3495  | 1,3495  |  |   |        |        |        |        |        |        |
|             |                                                                                            | NNDNFYTK                         | 1 | 6,1431  | 6,1431  |  |   |        |        |        |        |        |        |
| FRPD1_HUMAN | FERM and PDZ domain-containing protein 1 OS=Homo sapiens GN=FRPD1 PE=1 SV=1                | DILTVK                           | 2 | 8,4414  | 1,2871  |  |   |        | 8,4414 | 8,4414 | 8,4413 | 8,4413 | 1,2871 |
|             |                                                                                            | LSCFAVYVPAEK                     | 1 | 3,7852  | 3,7852  |  |   |        | 4      | 4,5007 | 4,7034 | 4,342  | 4,5482 |
|             |                                                                                            | SGVNVFLQFNDYANVK                 | 1 | 6,6937  | 6,6937  |  |   |        |        | 1,4326 |        |        | 1,348  |
|             |                                                                                            | YLAADKQGVTCER                    | 1 | 3,4101  | 3,4101  |  |   |        |        |        |        |        |        |
| FSCN1_HUMAN | Fascin OS=Homo sapiens GN=FSCN1 PE=1 SV=3                                                  | TIETAVK                          | 3 | 4,1126  | 4,1134  |  |   |        |        | 1,0123 |        |        |        |
| FST_HUMAN   | Follistatin OS=Homo sapiens GN=FST PE=1 SV=2                                               | EAAASSYLYLK                      | 1 | 0,3597  | 0,3597  |  |   |        |        |        |        | 0,3597 | 0,3597 |
| FBTL1_HUMAN | Follistatin-related protein 1 OS=Homo sapiens GN=FBTL1 PE=1 SV=1                           | CLNPSFNPFFK                      | 1 | 5,0951  | 5,0951  |  |   |        |        |        |        |        |        |
|             |                                                                                            | GAGTQVTVK                        | 3 | 1,9871  | 1,9871  |  |   |        |        |        |        |        |        |
|             |                                                                                            | GEPTLCEQKPK                      | 1 | 1,0994  | 1,0994  |  |   |        |        |        |        | 1,1442 |        |
|             |                                                                                            | GLOVDALIELSDENADWK               | 1 | 0,7245  | 0,7245  |  |   |        |        |        |        |        |        |
|             |                                                                                            | ICANVYQGR                        | 2 | 1,6203  | 1,5134  |  |   |        |        |        |        | 1,1449 |        |
|             |                                                                                            | IQWLEAEPDGWFSK                   | 1 | 0,7937  | 0,7937  |  |   |        |        |        |        |        |        |
|             |                                                                                            | IKWDVLSOK                        | 1 | 1,4448  | 1,4448  |  |   |        |        |        |        |        |        |
|             |                                                                                            | LQRSEFLK                         | 3 | 1,0575  | 1,0439  |  |   |        |        |        |        | 1,2147 |        |
|             |                                                                                            | LSRFQELK                         | 3 | 0,9624  | 0,9624  |  |   |        |        |        |        | 1,0836 |        |
| FTHD_HUMAN  | 10-formyltetrahydrofolate dehydrogenase OS=Homo sapiens GN=FTHD1 PE=1 SV=2                 | ISFTEVTEVK                       | 1 | 9,9878  | 9,9878  |  |   |        |        |        |        | 0,9878 | 0,9878 |
| GBP1_HUMAN  | Ras GTPase-activating protein-binding protein 1 OS=Homo sapiens GN=GBP1 PE=1 SV=1          | SELKDFQVGVNVLRL                  | 1 | 3,327   | 3,327   |  |   |        |        |        |        | 1      | 3,327  |
| GP3_HUMAN   | Glyceroldehyde-3-phosphate dehydrogenase OS=Homo sapiens GN=GDPI PE=1 SV=3                 | AGLAHGLQSK                       | 1 | 1,2197  | 1,2197  |  |   |        |        |        |        |        |        |
|             |                                                                                            | GALQSNVSTCAAK                    | 4 | 15,9795 | 12,452  |  |   |        | 10     | 8,1122 | 9,4987 | 6,6736 | 7,3514 |
|             |                                                                                            | ISNASCTNLCLAPLAK                 | 3 | 10,2083 | 8,9707  |  |   |        |        |        |        |        | 1,9571 |
|             |                                                                                            | LSWYVDFGYSNR                     | 1 | 10,8596 | 15,0596 |  |   |        |        |        |        |        |        |
|             |                                                                                            | QASEPKK                          | 1 | 1,4424  | 1,4424  |  |   |        |        |        |        |        |        |
|             |                                                                                            | TVDPGSK                          | 1 | 2,2655  | 2,2655  |  |   |        |        |        |        |        |        |
|             |                                                                                            | VHNDQNGQLMTHAHATAQK              | 2 | 2,4756  | 1,8229  |  |   |        |        |        |        | 3,7575 |        |
|             |                                                                                            | VHSAPADAMPVWGVNHEK               | 2 | 13,9001 | 13,6124 |  |   |        |        |        |        | 1,3368 |        |
|             |                                                                                            | VVDLMMWQSK                       | 3 | 12,4255 | 9,1914  |  |   |        |        |        |        | 2,3786 |        |
|             |                                                                                            | WSDAGAEVYVSTVDTTMEK              | 3 | 6,5647  | 1,9581  |  |   |        |        |        |        | 4,1952 |        |
| GPL1_HUMAN  | Glucose-6-phosphate isomerase OS=Homo sapiens GN=GPL1 PE=1 SV=4                            | FAYFQQDQMSQSK                    | 2 | 3,6029  | 3,6026  |  |   |        |        |        |        | 1,0189 | 4      |
|             |                                                                                            | HVALLTITK                        | 1 | 6,8435  | 6,8435  |  |   |        |        |        |        |        | 4      |
|             |                                                                                            | TFTTQETNAETAK                    | 1 | 7,7708  | 7,7708  |  |   |        |        |        |        |        |        |
|             |                                                                                            | WVYVSNIDGTHAK                    | 1 | 5,8461  | 5,8461  |  |   |        |        |        |        |        |        |
| GALT3_HUMAN | Polypeptide N-acetylgalactosaminyltransferase 5 OS=Homo sapiens GN=GALT3 PE=1 SV=1         | WQKGVNVDLESLR                    | 1 | 9,3999  | 9,3999  |  |   |        |        |        |        | 9,3999 | 9,3999 |
| GALT6_HUMAN | Polypeptide N-acetylgalactosaminyltransferase 6 OS=Homo sapiens GN=GALT6 PE=2 SV=2         | NLGTNCCGLDIIAR                   | 1 | 3,7026  | 3,7026  |  |   |        |        |        |        |        | 3,7026 |
| GBL1_HUMAN  | Guanine nucleotide-binding protein subunit beta-2-like 1 OS=Homo sapiens GN=GBL1 PE=1 SV=3 | FSFNSNPNVSCGGWVK                 | 1 | 9,0287  | 9,0287  |  |   |        |        |        |        |        |        |
|             |                                                                                            | YVLCMAGTGRK                      | 2 | 5,0915  | 4,9162  |  |   |        |        |        |        | 1,4092 |        |
|             |                                                                                            | DMNVVPLK                         | 2 | 5,2141  | 5,1675  |  |   |        |        |        |        | 3,2758 | 3,3724 |
|             |                                                                                            | KFDLGGVDVFTGHMALLYR              | 1 | 0,3713  | 0,3713  |  |   |        |        |        |        |        |        |
|             |                                                                                            | MGVTFQSNM                        | 1 | 2,601   | 2,601   |  |   |        |        |        |        |        |        |
| GDB1_HUMAN  | Ras GDP dissociation inhibitor alpha OS=Homo sapiens GN=GDI1 PE=1 SV=2                     | DMNVVPLK                         | 2 | 5,2141  | 5,1675  |  |   |        |        |        |        | 2,091  | 8      |
|             |                                                                                            | FVSSISDLK                        | 2 | 14,2713 | 14,2498 |  |   |        |        |        |        |        | 8      |
|             |                                                                                            | KFDLGGVDVFTGHMALLYR              | 1 | 0,3713  | 0,3713  |  |   |        |        |        |        |        | 7,8502 |
|             |                                                                                            | MTSGSDFEEMK                      | 2 | 3,2363  | 1,43    |  |   |        |        |        |        |        |        |
|             |                                                                                            | NPVYGGESASITFDLYK                | 1 | 12,2498 | 12,2498 |  |   |        |        |        |        |        |        |
|             |                                                                                            | TVDTTFETTCCDQK                   | 1 | 7,9514  | 7,9514  |  |   |        |        |        |        |        |        |
|             |                                                                                            | VICLSPK                          | 1 | 5,034   | 5,034   |  |   |        |        |        |        |        |        |
|             |                                                                                            | VPTTEALASSLMGLFEK                | 1 |         |         |  |   |        |        |        |        |        |        |





|              |                                                                                             |                                                                                                                                                                                                                                      |                                                                    |                                                                                                                                                           |                                                                                                                                                           |                         |                                      |                                      |                                      |                                      |
|--------------|---------------------------------------------------------------------------------------------|--------------------------------------------------------------------------------------------------------------------------------------------------------------------------------------------------------------------------------------|--------------------------------------------------------------------|-----------------------------------------------------------------------------------------------------------------------------------------------------------|-----------------------------------------------------------------------------------------------------------------------------------------------------------|-------------------------|--------------------------------------|--------------------------------------|--------------------------------------|--------------------------------------|
| KIF14_HUMAN  | Kinesin-like protein KIF14 OS=Homo sapiens GN=KIF14 PE=1 SV=1                               | NFGSVTSPVGEAKTVYWGK                                                                                                                                                                                                                  | 1                                                                  | 1,4549                                                                                                                                                    | 1,4549                                                                                                                                                    | 1                       | 1,4549                               | 1,4549                               | 1,4549                               | 1,4549                               |
| KIF7_HUMAN   | Kinesin-like protein KIF7 OS=Homo sapiens GN=KIF7 PE=1 SV=2                                 | ELANK                                                                                                                                                                                                                                | 1                                                                  | 2,3795                                                                                                                                                    | 2,3795                                                                                                                                                    | 1                       | 2,3795                               | 2,3795                               | 2,3795                               | 2,3795                               |
| KPYL_HUMAN   | Pyruvate kinase isozymes M1/M2 OS=Homo sapiens GN=PKM2 PE=1 SV=4                            | AEDSDVANANLADACIMGSGEATK<br>AGKPYVICATQMLSEMIK<br>CQENRILDFIK<br>GADFLVTEVGGSLGSK<br>GDLGPIPEIK<br>GDVWVLTGQWPPGQFNTNR<br>GIFPVLC<br>GSGTNEVLKIK<br>ITLDAVMEK<br>IVYDGSLQVK<br>LAPITSDPTFAVAGVAFK<br>SVETLK<br>TATESFASGSDPDRVWALDVK | 1<br>2<br>1<br>2<br>1<br>1<br>1<br>1<br>2<br>2<br>2<br>2           | 3,118<br>6,508<br>6,0545<br>3,4994<br>7,6489<br>1,8508<br>8,6049<br>4,1206<br>5,323<br>5,2997<br>5,6877<br>2,2709<br>4,5029                               | 3,118<br>6,508<br>6,0545<br>3,4994<br>7,6489<br>1,8508<br>8,6049<br>4,1206<br>5,323<br>5,2997<br>5,6877<br>2,2709<br>4,5029                               | 13                      | 4,5404<br>4,7092<br>3,6102<br>3,9568 | 4,5404<br>4,7092<br>3,6102<br>3,9568 | 4,5404<br>4,7092<br>3,6102<br>3,9568 | 4,5404<br>4,7092<br>3,6102<br>3,9568 |
| KPYR_HUMAN   | Pyruvate kinase isozymes R/L OS=Homo sapiens GN=PKLR PE=1 SV=2                              | GSLGPIPEK                                                                                                                                                                                                                            | 1                                                                  | 7,6489                                                                                                                                                    | 7,6489                                                                                                                                                    | 1                       | 7,6489                               | 7,6489                               | 7,6489                               | 7,6489                               |
| KRT34_HUMAN  | Keratin, type I cuticular Ha4 OS=Homo sapiens GN=KRT34 PE=1 SV=2                            | ETMFLNDR                                                                                                                                                                                                                             | 1                                                                  | 3,8488                                                                                                                                                    | 3,8488                                                                                                                                                    | 1                       | 3,8488                               | 3,8488                               | 3,8488                               | 3,8488                               |
| KRT35_HUMAN  | Keratin, type I cuticular Ha5 OS=Homo sapiens GN=KRT35 PE=2 SV=4                            | LAADDFR<br>SDLEAGVESLKEILLK                                                                                                                                                                                                          | 2<br>1                                                             | 2,8627<br>26,9037                                                                                                                                         | 2,8627<br>26,9037                                                                                                                                         | 10,773                  | 2                                    | 13,8932<br>8,5563                    | 4,873<br>2,7572                      | 2,7540<br>11,2037                    |
| KRT36_HUMAN  | Keratin, type I cuticular Ha6 OS=Homo sapiens GN=KRT36 PE=1 SV=1                            | ETMFLNDR<br>LAADDFR                                                                                                                                                                                                                  | 1<br>2                                                             | 3,8488<br>2,8627                                                                                                                                          | 3,8488<br>2,8627                                                                                                                                          | 10,773                  | 2                                    | 2,3657<br>1,8714                     | 1,8431<br>1,442                      | 1,4406<br>2,8328                     |
| KRT37_HUMAN  | Keratin, type I cuticular Ha7 OS=Homo sapiens GN=KRT37 PE=2 SV=3                            | LAADDFR                                                                                                                                                                                                                              | 2                                                                  | 2,8627                                                                                                                                                    | 2,8627                                                                                                                                                    | 10,773                  | 1                                    | 0,8827                               | 0,8827                               | 0,8827                               |
| KRT38_HUMAN  | Keratin, type I cuticular Ha8 OS=Homo sapiens GN=KRT38 PE=2 SV=3                            | ETMFLNDR<br>LAADDFR                                                                                                                                                                                                                  | 1<br>2                                                             | 3,8488<br>2,8627                                                                                                                                          | 3,8488<br>2,8627                                                                                                                                          | 10,773                  | 2                                    | 2,389<br>2,389                       | 1,891<br>1,891                       | 1,891<br>1,891                       |
| KRT81_HUMAN  | Keratin, type II cuticular Hb1 OS=Homo sapiens GN=KRT81 PE=1 SV=2                           | FLEQQNK                                                                                                                                                                                                                              | 3                                                                  | 8,3512                                                                                                                                                    | 8,3483                                                                                                                                                    | 1,033                   | 1                                    | 8,3512                               | 8,3512                               | 8,3512                               |
| KRT82_HUMAN  | Keratin, type II cuticular Hb2 OS=Homo sapiens GN=KRT82 PE=1 SV=3                           | LAGLEAFQK                                                                                                                                                                                                                            | 1                                                                  | 1,1525                                                                                                                                                    | 1,1525                                                                                                                                                    | 1                       | 1                                    | 1,1525                               | 1,1525                               | 1,1525                               |
| KRT83_HUMAN  | Keratin, type II cuticular Hb3 OS=Homo sapiens GN=KRT83 PE=1 SV=2                           | FLEQQNK                                                                                                                                                                                                                              | 2                                                                  | 8,3349                                                                                                                                                    | 8,3326                                                                                                                                                    | 1,0467                  | 1                                    | 8,3349                               | 8,3349                               | 8,3349                               |
| KRT84_HUMAN  | Keratin, type II cuticular Hb4 OS=Homo sapiens GN=KRT84 PE=1 SV=1                           | FASFQK<br>FLEQQNK<br>FLEQQNK                                                                                                                                                                                                         | 1<br>3<br>2                                                        | 1,2546<br>8,3512<br>8,3512                                                                                                                                | 1,2546<br>8,3483<br>8,3483                                                                                                                                | 1,033<br>1,033<br>1,033 | 3                                    | 6,0781<br>2,2009                     | 4,481<br>6,1556                      | 1,1826<br>13,218                     |
| KRT85_HUMAN  | Keratin, type II cuticular Hb5 OS=Homo sapiens GN=KRT85 PE=1 SV=1                           | FLEQQNK                                                                                                                                                                                                                              | 3                                                                  | 8,3512                                                                                                                                                    | 8,3483                                                                                                                                                    | 1,033                   | 1                                    | 8,3512                               | 8,3512                               | 8,3483                               |
| KRT86_HUMAN  | Keratin, type II cuticular Hb6 OS=Homo sapiens GN=KRT86 PE=1 SV=1                           | FLEQQNK                                                                                                                                                                                                                              | 2                                                                  | 8,3349                                                                                                                                                    | 8,3326                                                                                                                                                    | 1,0467                  | 1                                    | 8,3349                               | 8,3349                               | 8,3349                               |
| KRT88_HUMAN  | Keratin, type I cuticular Ha3-I OS=Homo sapiens GN=KRT88 PE=1 SV=2                          | ETMFLNDR<br>SDLEAGVESLKEILLK                                                                                                                                                                                                         | 1<br>1                                                             | 3,8488<br>26,9037                                                                                                                                         | 3,8488<br>26,9037                                                                                                                                         | 10,773                  | 2                                    | 15,3763<br>15,3763                   | 10,1766<br>10,1766                   | 10,1766<br>9,9585                    |
| KT3B8_HUMAN  | Keratin, type I cuticular Ha3-II OS=Homo sapiens GN=KRT38 PE=1 SV=3                         | ETMFLNDR<br>LAADDFR                                                                                                                                                                                                                  | 1<br>2                                                             | 3,8488<br>2,8627                                                                                                                                          | 3,8488<br>2,8627                                                                                                                                          | 10,773                  | 2                                    | 2,3657<br>1,8714                     | 1,8431<br>1,442                      | 1,4406<br>2,8328                     |
| LA_HUMAN     | Lupus La protein OS=Homo sapiens GN=SSB PE=1 SV=2                                           | BTVMFLGELVK<br>GSPVFAVLELSDW<br>LTFDFNVVALSK                                                                                                                                                                                         | 3<br>2<br>1                                                        | 7,524<br>1,2186<br>2,1936                                                                                                                                 | 7,524<br>1,2186<br>2,1936                                                                                                                                 | 2,2934                  | 3                                    | 2,6556<br>4,9689                     | 1,0915<br>2,3627                     | 2,3324<br>10,5724                    |
| LAMA4_HUMAN  | Laminin subunit alpha-4 OS=Homo sapiens GN=LAMA4 PE=1 SV=3                                  | AHLPLDINFR<br>DAPSPDPAK<br>DESENLNAR<br>ESMTNHSAGLVEGDADR<br>IFPTDYNHAPPELGR<br>LAALISEEK<br>LSLDEALDNLNWR<br>SLSVDEELVK<br>TLEPFLVLDGIDYNNK                                                                                         | 1<br>1<br>1<br>1<br>1<br>1<br>1<br>1<br>3                          | 1,0346<br>1,169<br>1,7512<br>1,2715<br>1,2075<br>2,4972<br>0,2<br>3,2302<br>3,202                                                                         | 1,0346<br>1,169<br>1,7512<br>1,2715<br>1,2075<br>2,4972<br>0,2<br>3,2302<br>3,202                                                                         | 9                       | 1,0657<br>1,0721                     | 0,9237<br>0,9591                     | 0,9517<br>1,945                      |                                      |
| LAMB1_HUMAN  | Laminin subunit beta-1 OS=Homo sapiens GN=LAMB1 PE=1 SV=1                                   | AADSSGAEV<br>ELAELEPK<br>ELSDGTEASLDNPK<br>IEDPYSR<br>KVDVCDSR<br>LNVSEHDQVK<br>NFLTQSDALDSAEAVNEVK<br>NIGSLEFEAK<br>SCACNPLGTPGNCDSETHGYCK<br>TLDLDEK<br>VESLQVFKHDSADADR<br>YFAVQCEAFPGISTGPK<br>YDDEPTEGIVSR                      | 1<br>2<br>1<br>1<br>1<br>1<br>1<br>1<br>2<br>1<br>1<br>1<br>1      | 1,2134<br>2,9633<br>1,4329<br>2,7873<br>1,4505<br>1,4592<br>1,182<br>1,392<br>2,4156<br>1,0856<br>1,8136<br>1,2426<br>1,6448                              | 1,2134<br>2,9633<br>1,4329<br>2,7873<br>1,4505<br>1,4592<br>1,182<br>1,392<br>2,4156<br>1,0856<br>1,8136<br>1,2426<br>1,6448                              | 13                      | 3,8304<br>3,1723                     | 1,8368<br>1,6908                     | 1,6881<br>2,4604                     |                                      |
| LAMB2_HUMAN  | Laminin subunit beta-2 OS=Homo sapiens GN=LAMB2 PE=1 SV=2                                   | DIEMK                                                                                                                                                                                                                                | 1                                                                  | 0,8411                                                                                                                                                    | 0,8411                                                                                                                                                    | 1                       | 0                                    | 0,3889                               | 0,3889                               | 0,3889                               |
| LAMC1_HUMAN  | Laminin subunit gamma-1 OS=Homo sapiens GN=LAMC1 PE=1 SV=3                                  | DFNEICFR<br>EVMDLR<br>KQEAAMDNR<br>LCCSINDMNCVNR<br>LGNACSSCHSPVLSLTOCDSYR<br>MEANLSELDK<br>NTEAGNLQADR<br>ODIVSISYPR<br>SIECVYSYPR<br>SNPQCEPQCYR<br>SYVAISFVQGR<br>TAEEALR<br>TFALVTDLNVNMLK<br>TQCCPCPCQCHQGR<br>YDIPGQNTSDEK     | 1<br>2<br>1<br>1<br>1<br>2<br>2<br>1<br>1<br>3<br>1<br>1<br>1<br>1 | 1,8411<br>4,5031<br>0,9708<br>0,989<br>0,987<br>1,4918<br>1,918<br>1,0172<br>0,9871<br>0,9871<br>3,1335<br>1,4535<br>1,3832<br>2,1675<br>1,3324<br>1,4253 | 1,8411<br>4,5031<br>0,9708<br>0,989<br>0,987<br>1,4918<br>1,918<br>1,0172<br>0,9871<br>0,9871<br>3,1335<br>1,4535<br>1,3832<br>2,1675<br>1,3324<br>1,4253 | 16                      | 1,3663<br>1,2957                     | 1,242<br>2,096                       | 1,1996<br>1,47                       |                                      |
| LAMB2_HUMAN  | Laminin subunit beta-2 OS=Homo sapiens GN=LAMB2 PE=1 SV=2                                   | DIEMK                                                                                                                                                                                                                                | 1                                                                  | 0,8411                                                                                                                                                    | 0,8411                                                                                                                                                    | 1                       | 0                                    | 0,3889                               | 0,3889                               | 0,3889                               |
| LAMC1_HUMAN  | Laminin subunit gamma-1 OS=Homo sapiens GN=LAMC1 PE=1 SV=3                                  | DFNEICFR<br>EVMDLR<br>KQEAAMDNR<br>LCCSINDMNCVNR<br>LGNACSSCHSPVLSLTOCDSYR<br>MEANLSELDK<br>NTEAGNLQADR<br>ODIVSISYPR<br>SIECVYSYPR<br>SNPQCEPQCYR<br>SYVAISFVQGR<br>TAEEALR<br>TFALVTDLNVNMLK<br>TQCCPCPCQCHQGR<br>YDIPGQNTSDEK     | 1<br>2<br>1<br>1<br>1<br>2<br>2<br>1<br>1<br>3<br>1<br>1<br>1<br>1 | 1,8411<br>4,5031<br>0,9708<br>0,989<br>0,987<br>1,4918<br>1,918<br>1,0172<br>0,9871<br>0,9871<br>3,1335<br>1,4535<br>1,3832<br>2,1675<br>1,3324<br>1,4253 | 1,8411<br>4,5031<br>0,9708<br>0,989<br>0,987<br>1,4918<br>1,918<br>1,0172<br>0,9871<br>0,9871<br>3,1335<br>1,4535<br>1,3832<br>2,1675<br>1,3324<br>1,4253 | 16                      | 1,3663<br>1,2957                     | 1,242<br>2,096                       | 1,1996<br>1,47                       |                                      |
| LDHA_HUMAN   | L-lactate dehydrogenase A-like isoform OS=Homo sapiens GN=LDHA PE=2 SV=1                    | LDHAGNSAR                                                                                                                                                                                                                            | 2                                                                  | 10,8327                                                                                                                                                   | 10,8327                                                                                                                                                   | 1,501                   | 1                                    | 10,8327                              | 10,8327                              | 10,8327                              |
| LDHB_HUMAN   | L-lactate dehydrogenase A chain OS=Homo sapiens GN=LDHA PE=2 SV=1                           | LDHAGNSAR                                                                                                                                                                                                                            | 2                                                                  | 10,8327                                                                                                                                                   | 10,8327                                                                                                                                                   | 1,501                   | 1                                    | 10,8327                              | 10,8327                              | 10,8327                              |
| LDHC_HUMAN   | L-lactate dehydrogenase B chain OS=Homo sapiens GN=LDHB PE=1 SV=2                           | DLDELADVDEK<br>DOLVNLK<br>DGLYKKEQITQNK<br>DYNVANSK<br>GLYRKDDFLVLPQVGNGSDLW                                                                                                                                                         | 6<br>3<br>1<br>1<br>1                                              | 4,6385<br>3,9634<br>1,7445<br>3,4468<br>2,4405                                                                                                            | 4,6385<br>3,9634<br>1,7445<br>3,4468<br>2,4405                                                                                                            | 9                       | 4,6761<br>5,0027                     | 4,0917<br>4,5623                     | 4,1207<br>7,839                      |                                      |
| LDHB_HUMAN   | L-lactate dehydrogenase B chain OS=Homo sapiens GN=LDHB PE=1 SV=2                           | DLDELADVDEK<br>DOLVNLK<br>DGLYKKEQITQNK<br>DYNVANSK<br>GLYRKDDFLVLPQVGNGSDLW                                                                                                                                                         | 6<br>3<br>1<br>1<br>1                                              | 4,6385<br>3,9634<br>1,7445<br>3,4468<br>2,4405                                                                                                            | 4,6385<br>3,9634<br>1,7445<br>3,4468<br>2,4405                                                                                                            | 9                       | 4,6761<br>5,0027                     | 4,0917<br>4,5623                     | 4,1207<br>7,839                      |                                      |
| LDHC_HUMAN   | L-lactate dehydrogenase C chain OS=Homo sapiens GN=LDHC PE=2 SV=4                           | LDHAGNSAR                                                                                                                                                                                                                            | 2                                                                  | 10,8327                                                                                                                                                   | 10,8327                                                                                                                                                   | 1,501                   | 1                                    | 10,8327                              | 10,8327                              | 10,8327                              |
| LEGI1_HUMAN  | Galectin-1 OS=Homo sapiens GN=LEGI1 PE=1 SV=2                                               | DGAMVGTQR<br>DNLHLNIFNR<br>FNHGDANTVNSK<br>GEPADPK<br>LNENAYNMAQDSFK<br>SFWNLQK                                                                                                                                                      | 3<br>3<br>4<br>1<br>8<br>4                                         | 9,1414<br>10,1878<br>6,7832<br>2,2722<br>5,6666<br>7,1352                                                                                                 | 9,1414<br>10,1878<br>6,7832<br>2,2722<br>5,6666<br>7,1352                                                                                                 | 6                       | 6,8336<br>6,5442                     | 6,4092<br>6,2545                     | 5,1987<br>1,598                      |                                      |
| LEGI3_HUMAN  | Galectin-3 OS=Homo sapiens GN=LEGI3 PE=1 SV=4                                               | DGAMVGTQR<br>DNLHLNIFNR<br>FNHGDANTVNSK<br>GEPADPK<br>LNENAYNMAQDSFK<br>SFWNLQK                                                                                                                                                      | 3<br>3<br>4<br>1<br>8<br>4                                         | 9,1414<br>10,1878<br>6,7832<br>2,2722<br>5,6666<br>7,1352                                                                                                 | 9,1414<br>10,1878<br>6,7832<br>2,2722<br>5,6666<br>7,1352                                                                                                 | 6                       | 6,8336<br>6,5442                     | 6,4092<br>6,2545                     | 5,1987<br>1,598                      |                                      |
| LEBP_HUMAN   | Galectin-3-binding protein OS=Homo sapiens GN=LEBP PE=1 SV=1                                | MULTISTRANAK<br>ELSEALQDFSOR<br>GGWTVCDNWDVDASVCCR                                                                                                                                                                                   | 1<br>1<br>1                                                        | 1,1992<br>1,1641<br>0,7377                                                                                                                                | 1,1992<br>1,1641<br>0,7377                                                                                                                                | 7                       | 2,2314<br>2,0258                     | 0,7938<br>0,7352                     | 0,7062<br>4,2412                     |                                      |
| LEIM1_HUMAN  | Lepimannin OS=Homo sapiens GN=LEIM1 PE=1 SV=1                                               | GLARWFK<br>LTYAETVSK                                                                                                                                                                                                                 | 1<br>1                                                             | 3,8884<br>1,9979                                                                                                                                          | 3,8884<br>1,9979                                                                                                                                          | 2                       | 2,9322<br>2,9322                     | 2,7793<br>2,7793                     | 2,7793<br>1,595                      |                                      |
| LELI1_HUMAN  | Lactoylglutathione lyase OS=Homo sapiens GN=LELI1 PE=1 SV=4                                 | GLARWFK<br>LTYAETVSK                                                                                                                                                                                                                 | 1<br>1                                                             | 3,8884<br>1,9979                                                                                                                                          | 3,8884<br>1,9979                                                                                                                                          | 2                       | 2,9322<br>2,9322                     | 2,7793<br>2,7793                     | 2,7793<br>1,595                      |                                      |
| LEMI1_HUMAN  | LIM and calponin homology domains-containing protein 1 OS=Homo sapiens GN=LEMI1 PE=1 SV=4   | SISLSPFR<br>BLADLQFK<br>LTYAETVSK                                                                                                                                                                                                    | 1<br>1<br>1                                                        | 7,3714<br>3,8884<br>1,9979                                                                                                                                | 7,3714<br>3,8884<br>1,9979                                                                                                                                | 1                       | 0,7314<br>2,9322                     | 0,7314<br>2,7793                     | 0,7314<br>1,595                      |                                      |
| LEMI2_HUMAN  | LIM and calponin homology domains-containing protein 2 OS=Homo sapiens GN=LEMI2 PE=1 SV=4   | SISLSPFR<br>BLADLQFK<br>LTYAETVSK                                                                                                                                                                                                    | 1<br>1<br>1                                                        | 7,3714<br>3,8884<br>1,9979                                                                                                                                | 7,3714<br>3,8884<br>1,9979                                                                                                                                | 1                       | 0,7314<br>2,9322                     | 0,7314<br>2,7793                     | 0,7314<br>1,595                      |                                      |
| LEMI3_HUMAN  | LIM and calponin homology domains-containing protein 3 OS=Homo sapiens GN=LEMI3 PE=1 SV=4   | SISLSPFR<br>BLADLQFK<br>LTYAETVSK                                                                                                                                                                                                    | 1<br>1<br>1                                                        | 7,3714<br>3,8884<br>1,9979                                                                                                                                | 7,3714<br>3,8884<br>1,9979                                                                                                                                | 1                       | 0,7314<br>2,9322                     | 0,7314<br>2,7793                     | 0,7314<br>1,595                      |                                      |
| LEMI4_HUMAN  | Lectin-like A4 hydrolase OS=Homo sapiens GN=LEMI4 PE=1 SV=2                                 | GLARWFK<br>LTYAETVSK                                                                                                                                                                                                                 | 1<br>1                                                             | 3,8884<br>1,9979                                                                                                                                          | 3,8884<br>1,9979                                                                                                                                          | 2                       | 2,9322<br>2,9322                     | 2,7793<br>2,7793                     | 2,7793<br>1,595                      |                                      |
| LEMI5_HUMAN  | Lamin-A/C OS=Homo sapiens GN=LEMI5 PE=1 SV=1                                                | ANFAEAGDAR<br>ACQVTVWAGAGATAPSPDLWVK<br>AGNVTGCGNSLR<br>ELQEQLNR<br>DSLQKASLQDK<br>MOQDEYELDELQK<br>TLEGLHRL                                                                                                                         | 1<br>1<br>1<br>3<br>3<br>2                                         | 2,4341<br>4,7368<br>10,2158<br>3,1236<br>3,9811<br>4,0289<br>8,5425                                                                                       | 2,4341<br>4,7368<br>10,2158<br>3,1236<br>3,9811<br>4,0289<br>8,5425                                                                                       | 7                       | 5,0087<br>4,1155                     | 3,057<br>1,8644                      | 1,7803<br>4,4469                     |                                      |
| LOX1_HUMAN   | Lysyl oxidase homologue 2 OS=Homo sapiens GN=LOX1 PE=1 SV=1                                 | LGSGSPHNEICDENK                                                                                                                                                                                                                      | 1                                                                  | 1,7128                                                                                                                                                    | 1,7128                                                                                                                                                    | 1                       | 1                                    | 1,7128                               | 1,7128                               | 1,7128                               |
| LRCC5_HUMAN  | Leucine-rich repeat-containing protein 59 OS=Homo sapiens GN=LRCC5 PE=1 SV=1                | IIBSNK<br>LVNHLHLLNK<br>LVLPVFAFLK                                                                                                                                                                                                   | 1<br>1<br>1                                                        | 9,7102<br>5,6127<br>10,2383                                                                                                                               | 9,7102<br>5,6127<br>10,2383                                                                                                                               | 11                      | 0,58                                 | 0,5799                               | 0,5191                               | 0,5264<br>0,4974<br>1,6473           |
| LTBP1_HUMAN  | Latent-transforming growth factor beta-binding protein 1 OS=Homo sapiens GN=LTBP1 PE=1 SV=3 | ASLGDHCIDRELEK<br>CQYDQRVR<br>CVDDECTVHLCDSGR<br>DQEDDEGHR<br>EADPGDSVYQGLPVQK<br>EPEVALTFR<br>GVFWGSSSEAGKQVNDLQFGDEIK<br>HPPEASVQVSR<br>MTCVNDKLNAR<br>QEDCGTVSTWGNK<br>YTCVQYGR                                                   | 2<br>1<br>2<br>1<br>1<br>1<br>1<br>2<br>2<br>2<br>1                | 6,6535<br>1,2713<br>2,7874<br>0,5965<br>1,6222<br>2,2796<br>1,6446<br>1,6212<br>2,5481<br>2,6449<br>0,282                                                 | 6,6535<br>1,2713<br>2,7874<br>0,5965<br>1,6222<br>2,2796<br>1,6446<br>1,6212<br>2,5481<br>2,6449<br>0,282                                                 | 11                      | 0,58                                 | 0,5799                               | 0,5191                               | 0,5264<br>0,4974<br>1,6473           |
| LTBP2_HUMAN  | Latent-transforming growth factor beta-binding protein 2 OS=Homo sapiens GN=LTBP2 PE=1 SV=2 | ASLGDHCIDRELEK<br>CQYDQRVR<br>CVDDECTVHLCDSGR<br>DQEDDEGHR<br>EADPGDSVYQGLPVQK<br>EPEVALTFR<br>GVFWGSSSEAGKQVNDLQFGDEIK<br>HPPEASVQVSR<br>MTCVNDKLNAR<br>QEDCGTVSTWGNK<br>YTCVQYGR                                                   | 2<br>1<br>2<br>1<br>1<br>1<br>1<br>2<br>2<br>2<br>1                | 6,6535<br>1,2713<br>2,7874<br>0,5965<br>1,6222<br>2,2796<br>1,6446<br>1,6212<br>2,5481<br>2,6449<br>0,282                                                 | 6,6535<br>1,2713<br>2,7874<br>0,5965<br>1,6222<br>2,2796<br>1,6446<br>1,6212<br>2,5481<br>2,6449<br>0,282                                                 | 13                      | 2,0947<br>2,183                      | 1,9198<br>1,9424                     | 1,8849<br>1,8196                     |                                      |
| LTBP4_HUMAN  | Latent-transforming growth factor beta-binding protein 4 OS=Homo sapiens GN=LTBP4 PE=1 SV=2 | ASLGDHCIDRELEK<br>CQYDQRVR<br>CVDDECTVHLCDSGR<br>DQEDDEGHR<br>EADPGDSVYQGLPVQK<br>EPEVALTFR<br>GVFWGSSSEAGKQVNDLQFGDEIK<br>HPPEASVQVSR<br>MTCVNDKLNAR<br>QEDCGTVSTWGNK<br>YTCVQYGR                                                   | 2<br>1<br>2<br>1<br>1<br>1<br>1<br>2<br>2<br>2<br>1                | 6,6535<br>1,2713<br>2,7874<br>0,5965<br>1,6222<br>2,2796<br>1,6446<br>1,6212<br>2,5481<br>2,6449<br>0,282                                                 | 6,6535<br>1,2713<br>2,7874<br>0,5965<br>1,6222<br>2,2796<br>1,6446<br>1,6212<br>2,5481<br>2,6449<br>0,282                                                 | 3                       | 0,023                                | 0,023                                | 3,1554<br>3,1554<br>3,1554           |                                      |
| LUM_HUMAN    | Lumican OS=Homo sapiens GN=LUM PE=1 SV=2                                                    | FNALQYR<br>ISNPFYFK<br>LKEDSAHPK<br>LPSGLVSLTYLDANK<br>NPTVRALENHYLVLEK<br>EVLVDLSDWAK                                                                                                                                               | 1<br>2<br>2<br>2<br>1<br>2                                         | 1,048<br>1,269<br>2,0144<br>4,4841<br>4,201<br>2,1648                                                                                                     | 1,048<br>1,269<br>2,0144<br>4,4841<br>4,201<br>2,1648                                                                                                     | 6                       | 0,6922<br>0,6281                     | 0,4427<br>0,4692                     | 0,4156<br>2,8938                     |                                      |
| LYAR_HUMAN   | Cell growth-regulating nuclear protein OS=Homo sapiens GN=LYAR PE=1 SV=2                    | SEELLVFVNF                                                                                                                                                                                                                           | 1                                                                  | 1,1329                                                                                                                                                    | 1,1329                                                                                                                                                    | 1                       | 1                                    | 1,1329                               | 1,1329                               | 1,1329                               |
| LYCE_HUMAN   | Lysine C OS=Homo sapiens GN=LYC PE=1 SV=1                                                   | STYQTSQR                                                                                                                                                                                                                             | 1                                                                  | 1,3372                                                                                                                                                    | 1,3372                                                                                                                                                    | 1                       | 1                                    | 1,3372                               | 1,3372                               | 1,3372                               |
| MATA1_HUMAN  | Mannose 6-phosphorylase 1,2-alpha-mannosidase IA OS=Homo sapiens GN=MATA1 PE=1 SV=3         | SEELLVFVNF                                                                                                                                                                                                                           | 1                                                                  | 1,1329                                                                                                                                                    | 1,1329                                                                                                                                                    | 1                       | 1                                    | 1,1329                               | 1,1329                               | 1,1329                               |
| MATP1_HUMAN  | Microtubule-associated protein 1A OS=Homo sapiens GN=MATP1 PE=1 SV=5                        | AMDLLEK                                                                                                                                                                                                                              | 1                                                                  | 0,9138                                                                                                                                                    | 0,9138                                                                                                                                                    | 1                       | 1                                    | 0,9138                               | 0,9138                               | 0,9138                               |
| MATP2_HUMAN  | Microtubule-associated protein 1B OS=Homo sapiens GN=MATP2 PE=1 SV=4                        | AMDLLEK                                                                                                                                                                                                                              | 1                                                                  | 0,9138                                                                                                                                                    | 0,9138                                                                                                                                                    | 1                       | 1                                    | 0,9138                               | 0,9138                               | 0,9138                               |
| MARCKS_HUMAN | Myristoylated alanine-rich C-kinase substrate OS=Homo sapiens GN=MARCKS PE=1 SV=4           | ELDANGASPAADKEPAAGGAASPAAEK<br>VDGSPAAASGAK                                                                                                                                                                                          | 1<br>1                                                             | 6,0917<br>0,6441                                                                                                                                          | 6,0917<br>0,6441                                                                                                                                          | 2                       | 6,3179<br>6,3179                     | 6,3179<br>6,3179                     | 6,3179<br>6,3179                     |                                      |
| MASP1_HUMAN  | Mannan-binding lectin serine protease 1 OS=Homo sapiens GN=MASP1 PE=1 SV=3                  | VGVNPNVGVGVYVVK                                                                                                                                                                                                                      | 2                                                                  | 1,069                                                                                                                                                     | 1,069                                                                                                                                                     | 1                       | 1                                    | 1,069                                | 1,069                                | 1,069                                |
| MATR3_HUMAN  | Matrin-3 OS=Homo sapiens GN=MATR3 PE=1 SV=2                                                 | GNVQVAVVGVYVVK                                                                                                                                                                                                                       | 2                                                                  | 1,069                                                                                                                                                     | 1,069                                                                                                                                                     | 1                       | 1                                    | 1,069                                | 1,069                                | 1,069                                |
| MDHC_HUMAN   | Malate dehydrogenase, cytoplasmic OS=Homo sapiens GN=MDHC PE=1 SV=4                         | MIWVGNHSSVYDPAVNAK<br>VYVGRRNKMLDKSK                                                                                                                                                                                                 | 1<br>2                                                             | 4,4273<br>2,1836                                                                                                                                          | 4,4273<br>2,1836                                                                                                                                          | 2                       | 3,3054<br>3,3054                     | 3,1092<br>3,1092                     | 3,1092<br>3,1092                     |                                      |
| MDHM_HUMAN   | Malate dehydrogenase, mitochondrial OS=Homo sapiens GN=MDHM PE=1 SV=2                       | ANTVLEK                                                                                                                                                                                                                              | 2                                                                  | 1,027                                                                                                                                                     | 1,0995                                                                                                                                                    | 1,054                   | 7                                    | 4,6563<br>4,9935                     | 4,1828<br>4,1642                     | 4,195<br>1,569                       |

|              |                                                                                                   |                      |         |         |         |        |         |         |         |
|--------------|---------------------------------------------------------------------------------------------------|----------------------|---------|---------|---------|--------|---------|---------|---------|
|              |                                                                                                   | FVLSVDMANGK          | 1       | 3,6076  | 3,6076  |        |         |         |         |
|              |                                                                                                   | GLHSPFPLQK           | 2       | 6,721   | 4,0133  | 4,769  |         |         |         |
|              |                                                                                                   | LTLYDAHTPGVAAALSHEIK | 1       | 2,3618  | 2,3618  |        |         |         |         |
|              |                                                                                                   | SOETCYTFYSPLLLGK     | 2       | 6,5515  | 6,0925  | 1,7286 |         |         |         |
|              |                                                                                                   | TIPLUQCTPK           | 1       | 2,8884  | 2,8884  |        |         |         |         |
|              |                                                                                                   | VAVLAGSGGQPLSLLLK    | 2       | 6,66    | 6,4554  | 1,4263 |         |         |         |
| MFGM_HUMAN   | Lactadherin OS=Homo sapiens GN=MFG6B PE=1 SV=2                                                    | EVFIITQDAR           | 1       | 0,4844  | 0,4844  |        |         |         |         |
|              |                                                                                                   | NLEITFLAR            | 1       | 0,3929  | 0,3929  |        |         |         |         |
|              |                                                                                                   | VFYIYVGLIK           | 1       | 2,085   | 2,085   |        | 2,085   | 2,085   | 2,085   |
| MCN_HUMAN    | Protein mcn3 nashi homolog OS=Homo sapiens GN=MCAGN PE=1 SV=1                                     | SCSCLFDQFGLIK        | 1       | 1,2299  | 1,2299  |        | 1,2299  | 1,2299  | 1,2299  |
| MNP_HUMAN    | Multiple inositol polyphosphate phosphatase 1 OS=Homo sapiens GN=MNMP1 PE=1 SV=1                  | ISLQWIK              | 1       | 3,8209  | 3,8209  |        |         |         |         |
| MROB_HUMAN   | Mitogen-activated protein kinase 9 OS=Homo sapiens GN=MMPK9 PE=1 SV=2                             | ATSNVFMFDSQDFGPK     | 1       | 1,2121  | 1,2121  |        | 1,8847  | 1,8847  | 1,8868  |
|              |                                                                                                   | QIRVVFTR             | 1       | 1,6683  | 1,6683  |        |         |         | 1,8698  |
| ML13_HUMAN   | Histone lysine N-methyltransferase ML13 OS=Homo sapiens GN=MLL3 PE=1 SV=3                         | LEEQNSK              | 1       | 15,9521 | 15,9521 |        | 15,9521 | 15,9521 | 15,9521 |
| MMP1_HUMAN   | Interstitial collagenase OS=Homo sapiens GN=MMP1 PE=1 SV=3                                        | ADVDHAEK             | 1       | 0,7893  | 0,7893  |        | 2       | 1,6314  | 1,385   |
|              |                                                                                                   | IRWVTPDGR            | 1       | 2,2925  | 2,2925  |        |         |         | 1,385   |
| MMP2_HUMAN   | 72 kDa type IV collagenase OS=Homo sapiens GN=MMP2 PE=1 SV=2                                      | AFQWVSDVTLR          | 2       | 2,929   | 2,8978  | 1,23   | 19      | 2,0435  | 2,2555  |
|              |                                                                                                   | 1,8284               | 1,8284  |         |         |        |         |         | 1,8956  |
|              |                                                                                                   | 1,42107              | 1,414   | 2,0128  |         |        |         |         |         |
|              |                                                                                                   | 1,5124               | 1,5124  |         |         |        |         |         |         |
|              |                                                                                                   | 1,8371               | 1,789   | 1,5365  |         |        |         |         |         |
|              |                                                                                                   | 3,21789              | 2,0546  | 1,5116  |         |        |         |         |         |
|              |                                                                                                   | 1,0336               | 0,0336  |         |         |        |         |         |         |
|              |                                                                                                   | 1,0336               | 1,9499  | 1,1979  |         |        |         |         |         |
|              |                                                                                                   | 1,1293               | 1,1293  |         |         |        |         |         |         |
|              |                                                                                                   | 1,0596               | 0,5599  |         |         |        |         |         |         |
|              |                                                                                                   | 1,3443               | 1,3443  |         |         |        |         |         |         |
|              |                                                                                                   | 1,5943               | 1,5943  |         |         |        |         |         |         |
|              |                                                                                                   | 1,4984               | 1,4984  |         |         |        |         |         |         |
|              |                                                                                                   | 2,1568               | 1,5284  | 1,5186  |         |        |         |         |         |
|              |                                                                                                   | 2,0362               | 1,9498  | 1,4588  |         |        |         |         |         |
|              |                                                                                                   | 3,11791              | 3,1377  | 2,163   |         |        |         |         |         |
|              |                                                                                                   | 1,3284               | 2,2824  |         |         |        |         |         |         |
|              |                                                                                                   | 1,9838               | 1,9838  |         |         |        |         |         |         |
|              |                                                                                                   | 2,10878              | 1,0533  | 1,4338  |         |        |         |         |         |
| MMP3_HUMAN   | Stromelysin-1 OS=Homo sapiens GN=MMP3 PE=1 SV=2                                                   | GSDISNNVCK           | 1       | 1,0915  | 1,0915  |        | 1       | 1,0915  | 1,0915  |
| MIRN1_HUMAN  | MicroRNA-1 OS=Homo sapiens GN=MIRN1 PE=1 SV=3                                                     | 1, ETSFLA            | 1       | 11,1539 | 5,1936  |        | 7       | 6,3286  | 6,3286  |
|              |                                                                                                   | 1, GTFPEFKQ          | 1       | 10,0762 | 10,0762 |        |         |         | 3,3187  |
|              |                                                                                                   | 1, IGAKDKMTINCK      | 1       | 18,1458 | 18,1458 |        |         |         | 4,4066  |
|              |                                                                                                   | 1, LSPYVLLNGVYVPGGK  | 1       | 0,7621  | 0,7621  |        |         |         |         |
|              |                                                                                                   | 1, LVEENAPYFSK       | 1       | 5,1905  | 5,1905  |        |         |         |         |
|              |                                                                                                   | 1, MTCQVWQAK         | 1       | 4,7198  | 4,7198  |        |         |         |         |
|              |                                                                                                   | 1, YNVAQWAK          | 1       | 0,252   | 0,252   |        |         |         |         |
| MOES_HUMAN   | Moesin OS=Homo sapiens GN=MSN PE=1 SV=3                                                           | AELLEDGR             | 2       | 10,8904 | 10,7535 | 1,2193 | 10      | 5,0704  | 6,2061  |
|              |                                                                                                   | 1, 19796             | 1,9796  |         |         |        |         |         | 3,638   |
|              |                                                                                                   | 2, 7464              | 5,9179  | 1,5001  |         |        |         |         | 4,7127  |
|              |                                                                                                   | 2, 4339              | 4,266   | 1,5438  |         |        |         |         |         |
|              |                                                                                                   | 2, 8,2137            | 8,1648  | 1,1672  |         |        |         |         |         |
|              |                                                                                                   | 3, 7,78              | 6,648   | 1,984   |         |        |         |         |         |
|              |                                                                                                   | 1, 11,127            | 11,127  |         |         |        |         |         |         |
|              |                                                                                                   | 2, 4,9645            | 4,8038  | 1,4404  |         |        |         |         |         |
|              |                                                                                                   | 1, 0,1463            | 0,1463  |         |         |        |         |         |         |
|              |                                                                                                   | 1, 1,4328            | 1,4328  |         |         |        |         |         |         |
| MPB2_HUMAN   | Microtubule-associated proteins 1A1B light chain 3 beta 2 OS=Homo sapiens GN=MAPLC3B2 PE=2 SV=1   | ILVDPHNNSELK         | 1       | 2,2142  | 2,2142  |        | 1       | 2,2142  | 2,2142  |
| MTA_HUMAN    | Metallothionein-1A OS=Homo sapiens GN=MTA PE=1 SV=1                                               | CAGDQCK              | 2       | 0,9959  | 0,9959  | 1,0015 | 1       | 0,9959  | 0,9959  |
| MT1E_HUMAN   | Metallothionein-1E OS=Homo sapiens GN=MT1E PE=1 SV=1                                              | SCSCSCPQCAK          | 2       | 7,3272  | 7,0904  | 4,398  | 1       | 7,3272  | 7,3272  |
| MT1G_HUMAN   | Metallothionein-1G OS=Homo sapiens GN=MT1G PE=1 SV=2                                              | CAGDQCK              | 1       | 0,8072  | 0,8072  |        | 2       | 7,915   | 6,893   |
|              |                                                                                                   | SCSCSCPQCAK          | 2       | 6,2699  | 5,999   | 2,0106 | 2       | 7,155   | 8,439   |
| MT1H_HUMAN   | Metallothionein-1H OS=Homo sapiens GN=MT1H PE=1 SV=1                                              | CAGDQCK              | 2       | 0,9959  | 0,9959  | 1,0015 | 1       | 0,9959  | 0,9959  |
| MT1M_HUMAN   | Metallothionein-1M OS=Homo sapiens GN=MT1M PE=2 SV=2                                              | SCSCSCPQCAK          | 2       | 7,3272  | 7,0904  | 4,398  | 1       | 7,3272  | 7,3272  |
| MT1X_HUMAN   | Metallothionein-1X OS=Homo sapiens GN=MT1X PE=1 SV=1                                              | CAGDQCK              | 1       | 0,1049  | 0,1049  |        | 2       | 6,7621  | 6,864   |
|              |                                                                                                   | SCSCSCPQCAK          | 2       | 5,4795  | 5,4795  |        |         |         | 6,064   |
| MT2_HUMAN    | Metallothionein-2 OS=Homo sapiens GN=MT2 PE=1 SV=1                                                | CAGDQCK              | 2       | 0,9959  | 0,9959  | 1,0015 | 2       | 7,7116  | 7,7116  |
|              |                                                                                                   | SCSCSCPQCAK          | 2       | 7,3272  | 7,0904  | 4,398  | 1       | 7,02    | 7,702   |
| MUC16_HUMAN  | Cell surface glycoprotein MUC16 OS=Homo sapiens GN=MCAM PE=1 SV=2                                 | CLADGNPFHSISK        | 1       | 0,308   | 0,308   |        | 4       | 6,6191  | 6,6191  |
|              |                                                                                                   | EDDKHAFIEVLNVR       | 1       | 10,7838 | 10,7838 |        |         |         | 3,6509  |
|              |                                                                                                   | EYVVFVYPTK           | 1       | 5,3053  | 5,3053  |        |         |         | 3,6509  |
|              |                                                                                                   | GPVLGLLICK           | 1       | 10,1291 | 10,1291 |        |         |         | 3,6509  |
| MYP_HUMAN    | Major vault protein OS=Homo sapiens GN=MYP PE=1 SV=4                                              | DTPRQLAIPNLIK        | 1       | 37,4533 | 37,4533 |        | 1       | 37,4533 | 37,4533 |
| MY18_HUMAN   | Myosin-10 OS=Homo sapiens GN=MY10 PE=1 SV=3                                                       | TGLEEEDELQATEAK      | 1       | 6,0551  | 6,0551  |        | 1       | 6,0551  | 6,0551  |
| MY11_HUMAN   | Myosin-11 OS=Homo sapiens GN=MY11 PE=1 SV=3                                                       | DLEGELEAK            | 4       | 4,4979  | 4,4979  | 4      | 5       | 5,1765  | 5,1765  |
|              |                                                                                                   | KEEQLQAALR           | 1       | 6,2104  | 6,2104  |        |         |         | 5,0817  |
|              |                                                                                                   | 3, 3,8427            | 3,8427  |         |         |        |         |         | 5,0817  |
|              |                                                                                                   | 1, 0,6551            | 0,6551  |         |         |        |         |         | 1,2508  |
| MY14_HUMAN   | Myosin-14 OS=Homo sapiens GN=MY14 PE=1 SV=1                                                       | TGLEEEDELQATEAK      | 1       | 0,8111  | 0,8111  |        | 2,3501  | 3       | 3,4447  |
|              |                                                                                                   | KEEQLQAALR           | 2       | 6,2104  | 6,2104  |        |         |         | 2,6288  |
|              |                                                                                                   | 3, 3,8427            | 3,8427  |         |         |        |         |         | 1,6429  |
| MY19_HUMAN   | Myosin-9 OS=Homo sapiens GN=MY19 PE=1 SV=4                                                        | DLEGELEAK            | 4       | 4,4979  | 4,4979  | 14     | 3,8712  | 3,8802  | 2,7502  |
|              |                                                                                                   | EGDQFNEAK            | 2       | 1,8111  | 1,1524  | 2,3501 |         |         | 2,6117  |
|              |                                                                                                   | 1, 2,127             | 2,127   |         |         |        |         |         | 2,525   |
|              |                                                                                                   | 1, 1,0337            | 1,0337  |         |         |        |         |         | 2,6117  |
|              |                                                                                                   | 3, 7,0888            | 6,618   | 1,572   |         |        |         |         |         |
|              |                                                                                                   | 1, 6,2104            | 6,2104  |         |         |        |         |         |         |
|              |                                                                                                   | 1, 2,9468            | 2,9468  |         |         |        |         |         |         |
|              |                                                                                                   | 1, 0,9922            | 0,9922  |         |         |        |         |         |         |
|              |                                                                                                   | 1, 2,1208            | 2,1208  |         |         |        |         |         |         |
|              |                                                                                                   | 1, 1,8656            | 1,8656  |         |         |        |         |         |         |
|              |                                                                                                   | 1, 3,9427            | 3,9427  |         |         |        |         |         |         |
|              |                                                                                                   | 0                    |         |         |         |        |         |         |         |
|              |                                                                                                   | 1, 6,0551            | 6,0551  |         |         |        |         |         |         |
|              |                                                                                                   | 1, 4,5542            | 4,5542  |         |         |        |         |         |         |
| MYL6_HUMAN   | Myosin light polypeptide 6 OS=Homo sapiens GN=ML6 PE=1 SV=2                                       | HVLYLQGR             | 1       | 3,743   | 3,743   |        | 2       | 4,3501  | 4,3501  |
|              |                                                                                                   | VLQHEELQAK           | 1       | 4,529   | 4,529   |        |         |         | 4,3118  |
| MYPT1_HUMAN  | Protein phosphatase 1 regulatory subunit 12A OS=Homo sapiens GN=PPP1R12A PE=1 SV=1                | LVNLDGMELINIK        | 1       | 0,7194  | 0,7194  |        | 1       | 0,7194  | 0,7194  |
| NAAMPT_HUMAN | Nicotinamide phosphoribosyltransferase OS=Homo sapiens GN=NAAMPT PE=1 SV=1                        | DPVPGYPRNADSHWIK     | 1       | 3,2027  | 3,2027  |        |         |         | 0,7194  |
|              |                                                                                                   | GWNYLEK              | 1       | 1,1923  | 1,1923  |        |         |         | 1,8077  |
|              |                                                                                                   | 1, 2,577             | 2,577   |         |         |        |         |         |         |
|              |                                                                                                   | 1, 0,0799            | 0,0799  |         |         |        |         |         |         |
|              |                                                                                                   | 3, 4,3523            | 0,7314  | 27,3486 |         |        |         |         |         |
| NBL1_HUMAN   | Neuroblastoma suppressor of tumorigenicity 1 OS=Homo sapiens GN=NBL1 PE=1 SV=1                    | YLTEISGDELVEK        | 1       | 0,9521  | 0,9521  |        |         |         | 0,7387  |
| NDK3_HUMAN   | Platane nucleoside diphosphate kinase OS=Homo sapiens GN=NME2P1 PE=5 SV=1                         | LHSCSGQDK            | 1       | 0,7387  | 0,7387  |        |         |         | 0,7387  |
|              |                                                                                                   | DRPFPLGLK            | 1       | 7,051   | 7,051   |        | 3       | 4,6828  | 4,0538  |
|              |                                                                                                   | VALGETSNDSPPTR       | 1       | 3,7863  | 3,7863  |        |         |         | 4,8007  |
|              |                                                                                                   | YNNQSPVAVWVEGLNFK    | 3       | 3,1406  | 3,0855  | 1,2659 |         |         | 3,8347  |
| NDKA_HUMAN   | Nucleoside diphosphate kinase A OS=Homo sapiens GN=NME1 PE=1 SV=1                                 | GLVSEIK              | 2       | 4,5287  | 4,2487  | 1,6684 | 5       | 3,7993  | 3,8922  |
|              |                                                                                                   | 1, 4,1858            | 4,1858  |         |         |        |         |         | 3,7871  |
|              |                                                                                                   | 2, 3,7201            | 3,684   | 1,2186  |         |        |         |         |         |
|              |                                                                                                   | 1, 3,7863            | 3,7863  |         |         |        |         |         |         |
|              |                                                                                                   | 1, 2,7559            | 2,7559  |         |         |        |         |         |         |
| NDKB_HUMAN   | Nucleoside diphosphate kinase B OS=Homo sapiens GN=NME2 PE=1 SV=1                                 | DRPFPLGLK            | 1       | 7,051   | 7,051   |        | 6       | 4,5405  | 4,189   |
|              |                                                                                                   | 1, 4,5287            | 4,2487  | 1,6684  |         |        |         |         | 4,3999  |
|              |                                                                                                   | 1, 4,1858            | 4,1858  |         |         |        |         |         | 4,0415  |
|              |                                                                                                   | 1, 3,7863            | 3,7863  |         |         |        |         |         | 3,9513  |
|              |                                                                                                   | 3, 3,1406            | 3,0855  | 1,2659  |         |        |         |         | 1,3504  |
| NDU12_HUMAN  | NADH dehydrogenase (ubiquinone) flavoprotein 2, mitochondrial OS=Homo sapiens GN=NDUFV2 PE=1 SV=2 | DELEDLKL             | 1       | 0,7395  | 0,7395  |        | 1       | 0,7395  | 0,7395  |
| NEDD8_HUMAN  | NEDD8 OS=Homo sapiens GN=NEDD8 PE=1 SV=1                                                          | ELIEMFDIKVR          | 1       | 0,2704  | 0,2704  |        |         |         | 0,2704  |
| NEL1_HUMAN   | Protein kinase C-binding protein NEL1 OS=Homo sapiens GN=NEL1 PE=2 SV=3                           | CRGDP                | 1       | 0,6039  | 0,6039  |        |         |         | 0,6039  |
| NEL4_HUMAN   | Neurospine, mitochondrial OS=Homo sapiens GN=NLN PE=1 SV=1                                        | ALGLAFDDFDSLEK       | 1       | 5,8565  | 5,8565  |        |         |         | 5,8565  |
| NEM_HUMAN    | Neurofilament heavy polypeptide OS=Homo sapiens GN=NEMF PE=1 SV=4                                 | EYDGLLWIK            | 4       | 8,7829  | 8,7822  | 0,752  | 1       | 8,7829  | 8,7829  |
| NEL_HUMAN    | Neurofilament light polypeptide OS=Homo sapiens GN=NEML PE=1 SV=2                                 | FYDGLLWIK            | 4       | 8,7829  | 8,7822  | 0,752  | 1       | 8,7829  | 8,7829  |
| NEM_HUMAN    | Neurofilament medium polypeptide OS=Homo sapiens GN=NEMF PE=1 SV=4                                | EYDGLLWIK            | 4       | 8,7829  | 8,7822  | 0,752  | 1       | 8,7829  | 8,7829  |
| NBL1_HUMAN   | Nban-like protein 1 OS=Homo sapiens GN=FAM128B PE=1 SV=2                                          | EVTDMNLVINGDGGK      | 1       | 3,0596  | 3,0596  |        | 2       | 1,8626  | 1,8626  |
|              |                                                                                                   | QWISSDQAVWVYEDAK     | 1       | 0,2655  | 0,2655  |        |         |         | 0,9013  |
| NID1_HUMAN   | Nidogen-1 OS=Homo sapiens GN=NID1 PE=1 SV=3                                                       | EDLSPSISR            | 1       | 1,1628  | 1,1628  |        | 5       | 7,0462  | 7,0462  |
|              |                                                                                                   | GNLYVTDWIK           | 1       | 0,6399  | 0,6399  |        |         |         | 2,7239  |
|              |                                                                                                   | 1, 6,2175            | 6,2175  |         |         |        |         |         | 2,7239  |
|              |                                                                                                   | 1, 25,9959           | 25,9959 |         |         |        |         |         |         |
|              |                                                                                                   | 1, 1,2545            | 1,2545  |         |         |        |         |         |         |
| NID2_HUMAN   | Nidogen-2 OS=Homo sapiens GN=NID2 PE=1 SV=2                                                       | EDTSPVGLAAR          | 1       | 0,3952  | 0,3952  |        | 4       | 0,7907  | 0,7907  |
|              |                                                                                                   | ELVHYSDIVTSTSR       | 1       | 0,8863  | 0       |        |         |         |         |



Table with 13 columns: Gene Name, Description, Species, Protein ID, RefSeq ID, UniProt ID, Pfam ID, InterPro ID, PROSITE ID, and a final numerical value. The table lists various genes and their protein products, such as PRPH1\_HUMAN, PRDX1\_HUMAN, PRDX2\_HUMAN, etc.



|              |                                                                                    |                           |   |         |         |        |        |         |         |        |        |         |
|--------------|------------------------------------------------------------------------------------|---------------------------|---|---------|---------|--------|--------|---------|---------|--------|--------|---------|
| TGM2_HUMAN   | Protein glutamine gamma-glutamyltransferase 2 OS=Homo sapiens GN=TGM2 PE=1 SV=2    | NEFGGIQGG                 | 1 | 2.8884  | 2.8884  | 2      | 2.7146 | 2.7146  | 2.7108  | 2.7108 | 2.7108 | 1.0779  |
| THO_HUMAN    | Thioredoxin OS=Homo sapiens GN=TXN PE=1 SV=3                                       | YVWLVNLEPSEK              | 1 | 2.5708  | 2.5708  |        |        |         |         |        |        | 5.508   |
| THOM_HUMAN   | Thioredoxin mitochondrial OS=Homo sapiens GN=TXN2 PE=1 SV=2                        | ISFSLDMLQEK               | 2 | 5.5429  | 5.508   | 1.1724 | 1      | 5.5429  | 5.5429  | 5.5429 | 5.5429 | 5.508   |
| TICN1_HUMAN  | Testican-1 OS=Homo sapiens GN=SPOCK1 PE=1 SV=1                                     | VVNSETHPPVDFHAWGGQPK      | 1 | 2.1244  | 2.1444  |        |        | 2.1244  | 2.1444  | 2.1444 | 2.1444 | 2.736   |
| TICN3_HUMAN  | Testican-3 OS=Homo sapiens GN=SPOCK3 PE=1 SV=2                                     | DSLGMFMNR                 | 2 | 4.0696  | 4.0349  | 1.2036 | 5      | 2.0877  | 2.8902  | 2.5548 | 2.7635 | 1.4418  |
| TIMP1_HUMAN  | Metalloproteinase inhibitor 1 OS=Homo sapiens GN=TIMP1 PE=1 SV=1                   | LSLNNEWYCYCPGPKPCPCNEMNR  | 2 | 2.6092  | 2.5356  | 2.5663 |        |         |         |        |        | 2.1244  |
| TIMP2_HUMAN  | Metalloproteinase inhibitor 2 OS=Homo sapiens GN=TIMP2 PE=1 SV=2                   | BLATLGGSPKPCPCPKR         | 0 | 0       | 0       |        |        |         |         |        |        | 1.6657  |
| TKT_HUMAN    | Transketolase OS=Homo sapiens GN=TKT PE=1 SV=3                                     | VVTVGQYDTALCVSR           | 1 | 1.6657  | 1.6657  |        |        |         |         |        |        | 1.4632  |
| TLN1_HUMAN   | Talin-1 OS=Homo sapiens GN=TLN1 PE=1 SV=3                                          | DSLGMFMNR                 | 1 | 4.8988  | 4.9988  |        |        | 2.0345  | 2.2127  | 1.963  | 2.1472 | 1.4632  |
| TLN2_HUMAN   | Talin-2 OS=Homo sapiens GN=TLN2 PE=1 SV=4                                          | FVDSGDYGNPKR              | 1 | 0.6399  | 0.6399  | 1.2583 |        |         |         |        |        | 1.1692  |
| TNPO3_HUMAN  | Tumor necrosis factor 3 OS=Homo sapiens GN=TNPO3 PE=1 SV=2                         | EYVLDGK                   | 2 | 2.6833  | 2.6833  | 1.0058 |        |         |         |        |        | 1.2856  |
| TP1_HUMAN    | Topoisomerase 1 OS=Homo sapiens GN=TP1 PE=1 SV=2                                   | SCDSGMMYR                 | 3 | 1.0816  | 1.0531  | 1.5092 |        |         |         |        |        | 1.4837  |
| TP1M1_HUMAN  | Topoisomerase alpha-1 chain OS=Homo sapiens GN=TP1M1 PE=1 SV=2                     | AVELAANTK                 | 1 | 0.075   | 0.075   | 7      | 4.0656 | 4.3231  | 1.9938  | 2.4597 |        | 1.8356  |
| TP1M2_HUMAN  | Topoisomerase beta chain OS=Homo sapiens GN=TP1M2 PE=1 SV=1                        | LGSDPAPLQHMMDYQK          | 1 | 5.8066  | 5.8066  |        |        |         |         |        |        | 1.0005  |
| TP1M3_HUMAN  | Topoisomerase alpha-3 chain OS=Homo sapiens GN=TP1M3 PE=1 SV=1                     | NMAEQIQEISQIQK            | 2 | 5.1866  | 5.1821  | 1.0005 |        |         |         |        |        | 2.0837  |
| TP1M4_HUMAN  | Topoisomerase alpha-4 chain OS=Homo sapiens GN=TP1M4 PE=1 SV=3                     | KNFTSIEIK                 | 1 | 3.7861  | 3.7861  |        |        |         |         |        |        | 1.8356  |
| TP38_HUMAN   | Putative triosephosphate isomerase-like protein LDC2M016 OS=Homo sapiens PE=1 SV=2 | QAFDTAVTSSLQGLGAACGMAYTK  | 1 | 3.3397  | 3.3397  |        |        |         |         |        |        | 17.1538 |
| TP53_HUMAN   | Tumor protein p53 OS=Homo sapiens GN=TP53 PE=1 SV=2                                | TSRIPNATYNNESFGQSQAK      | 2 | 6.2922  | 6.2922  |        |        |         |         |        |        | 1.4837  |
| TPS1_HUMAN   | Triosephosphate isomerase OS=Homo sapiens GN=TP1 PE=1 SV=2                         | VEEEDLSQALAK              | 1 | 5.1483  | 5.1483  |        |        | 0.1243  | 0.1243  | 0.1243 | 0.1243 | 0.1243  |
| TPS2_HUMAN   | Triosephosphate isomerase 2 OS=Homo sapiens GN=TP2 PE=1 SV=2                       | ELASQPVDFLFGQSLKPFVDFDIAK | 2 | 6.8643  | 6.8233  | 1.4787 |        |         |         |        |        | 6.0523  |
| TPS3_HUMAN   | Triosephosphate isomerase 3 OS=Homo sapiens GN=TP3 PE=1 SV=2                       | IFVGGSELDK                | 1 | 14.5903 | 14.5903 |        |        |         |         |        |        | 5.8113  |
| TPS4_HUMAN   | Triosephosphate isomerase 4 OS=Homo sapiens GN=TP4 PE=1 SV=2                       | IWAQNCYIK                 | 1 | 9.3287  | 9.3287  |        |        |         |         |        |        | 1.9968  |
| TPS5_HUMAN   | Triosephosphate isomerase 5 OS=Homo sapiens GN=TP5 PE=1 SV=2                       | IYQSGVTATCK               | 1 | 11.2529 | 11.2529 |        |        |         |         |        |        | 1.9668  |
| TPS6_HUMAN   | Triosephosphate isomerase 6 OS=Homo sapiens GN=TP6 PE=1 SV=2                       | ORLCELKELNAK              | 3 | 5.4617  | 5.4607  | 2.1408 |        |         |         |        |        | 1.5484  |
| TPS7_HUMAN   | Triosephosphate isomerase 7 OS=Homo sapiens GN=TP7 PE=1 SV=2                       | TATPQADEHEIK              | 3 | 5.2123  | 5.2327  | 7.8017 |        |         |         |        |        | 1.9668  |
| TPS8_HUMAN   | Triosephosphate isomerase 8 OS=Homo sapiens GN=TP8 PE=1 SV=2                       | VTVGTAFTGSPQAIK           | 3 | 7.4178  | 6.9871  | 1.6834 |        |         |         |        |        | 1.5484  |
| TPS9_HUMAN   | Triosephosphate isomerase 9 OS=Homo sapiens GN=TP9 PE=1 SV=2                       | VFQGIK                    | 1 | 3.9174  | 3.9174  |        |        |         |         |        |        | 1.9668  |
| TPS10_HUMAN  | Triosephosphate isomerase 10 OS=Homo sapiens GN=TP10 PE=1 SV=2                     | VLALEPVWAGTIK             | 3 | 3.8993  | 9.2127  | 1.2789 |        |         |         |        |        | 1.9968  |
| TPS11_HUMAN  | Triosephosphate isomerase 11 OS=Homo sapiens GN=TP11 PE=1 SV=2                     | IACHT                     | 1 | 1.0178  | 1.0178  |        |        | 2.4676  | 2.4676  | 1.9968 | 1.9968 | 2.5936  |
| TPS12_HUMAN  | Triosephosphate isomerase 12 OS=Homo sapiens GN=TP12 PE=1 SV=2                     | VFQGIK                    | 1 | 3.9174  | 3.9174  |        |        |         |         |        |        | 1.9668  |
| TPS13_HUMAN  | Triosephosphate isomerase 13 OS=Homo sapiens GN=TP13 PE=1 SV=2                     | IQLVEELLR                 | 1 | 5.8299  | 5.8299  |        |        | 6.0121  | 7.4121  | 6.1886 | 6.9502 | 6.9489  |
| TPS14_HUMAN  | Triosephosphate isomerase 14 OS=Homo sapiens GN=TP14 PE=1 SV=2                     | LATALQK                   | 1 | 4.1317  | 4.1317  |        |        |         |         |        |        | 1.4218  |
| TPS15_HUMAN  | Triosephosphate isomerase 15 OS=Homo sapiens GN=TP15 PE=1 SV=2                     | MEDQIQK                   | 2 | 8.8449  | 9.8413  | 1.039  |        |         |         |        |        | 1.2828  |
| TPS16_HUMAN  | Triosephosphate isomerase 16 OS=Homo sapiens GN=TP16 PE=1 SV=2                     | IQLVEELLR                 | 1 | 5.8299  | 5.8299  |        |        | 4.5166  | 4.5166  | 4.4218 | 4.4218 | 4.4218  |
| TPS17_HUMAN  | Triosephosphate isomerase 17 OS=Homo sapiens GN=TP17 PE=1 SV=2                     | LATALQK                   | 1 | 4.1317  | 4.1317  |        |        |         |         |        |        | 1.4218  |
| TPS18_HUMAN  | Triosephosphate isomerase 18 OS=Homo sapiens GN=TP18 PE=1 SV=2                     | MELQEMQK                  | 1 | 3.9212  | 3.9212  |        |        | 6.0121  | 7.4121  | 6.1886 | 6.9502 | 6.9489  |
| TPS19_HUMAN  | Triosephosphate isomerase 19 OS=Homo sapiens GN=TP19 PE=1 SV=2                     | LATALQK                   | 1 | 4.1317  | 4.1317  |        |        |         |         |        |        | 1.4218  |
| TPS20_HUMAN  | Triosephosphate isomerase 20 OS=Homo sapiens GN=TP20 PE=1 SV=2                     | MELQEMQK                  | 2 | 8.8449  | 9.8413  | 1.039  |        |         |         |        |        | 1.2828  |
| TPS21_HUMAN  | Triosephosphate isomerase 21 OS=Homo sapiens GN=TP21 PE=1 SV=2                     | MEVSELK                   | 2 | 1.41    | 0.5601  | 9.2684 | 9      | 9.8449  | 9.8449  | 9.8448 | 9.8448 | 9.8413  |
| TPS22_HUMAN  | Triosephosphate isomerase 22 OS=Homo sapiens GN=TP22 PE=1 SV=2                     | EENYGLHETLLEMLICI         | 1 | 4.158   | 4.158   |        |        | 4.2096  | 3.8984  | 3.794  | 3.9899 | 2.6784  |
| TPS23_HUMAN  | Triosephosphate isomerase 23 OS=Homo sapiens GN=TP23 PE=1 SV=2                     | EKAEGVVALNR               | 1 | 4.5825  | 4.5825  |        |        |         |         |        |        | 1.6772  |
| TPS24_HUMAN  | Triosephosphate isomerase 24 OS=Homo sapiens GN=TP24 PE=1 SV=2                     | IQLVEELLR                 | 1 | 5.8299  | 5.8299  |        |        |         |         |        |        | 1.4218  |
| TPS25_HUMAN  | Triosephosphate isomerase 25 OS=Homo sapiens GN=TP25 PE=1 SV=2                     | KDVALDQDQDEAFDR           | 1 | 7.5293  | 7.5293  |        |        |         |         |        |        | 1.4218  |
| TPS26_HUMAN  | Triosephosphate isomerase 26 OS=Homo sapiens GN=TP26 PE=1 SV=2                     | LATALQK                   | 1 | 4.1317  | 4.1317  |        |        |         |         |        |        | 1.4218  |
| TPS27_HUMAN  | Triosephosphate isomerase 27 OS=Homo sapiens GN=TP27 PE=1 SV=2                     | MEDQIQK                   | 3 | 3.9174  | 3.9174  |        |        |         |         |        |        | 1.4218  |
| TPS28_HUMAN  | Triosephosphate isomerase 28 OS=Homo sapiens GN=TP28 PE=1 SV=2                     | TIDQLEK                   | 1 | 2.4671  | 2.4671  |        |        |         |         |        |        | 1.4218  |
| TPS29_HUMAN  | Triosephosphate isomerase 29 OS=Homo sapiens GN=TP29 PE=1 SV=2                     | VKPFMTAQGIK               | 1 | 5.1499  | 5.1499  |        |        | 5.1499  | 5.1499  | 5.1499 | 5.1499 | 5.1499  |
| TPS30_HUMAN  | Triosephosphate isomerase 30 OS=Homo sapiens GN=TP30 PE=1 SV=2                     | OSPVDYKQK                 | 1 | 0.1734  | 0.1734  |        |        | 0.1734  | 0.1734  | 0.1734 | 0.1734 | 0.1734  |
| TRAF3_HUMAN  | Tumor necrosis factor 3 OS=Homo sapiens GN=TRAF3 PE=1 SV=2                         | SDVAVK                    | 2 | 2.2833  | 2.0441  | 1.9694 | 1      | 2.2833  | 2.2833  | 2.2833 | 2.2833 | 2.0441  |
| TRAF4_HUMAN  | Tumor necrosis factor 4 OS=Homo sapiens GN=TRAF4 PE=1 SV=2                         | CGVPLAENYK                | 1 | 0.8108  | 0.8108  |        |        | 0.8108  | 0.8108  | 0.8108 | 0.8108 | 0.8108  |
| TRAF5_HUMAN  | Tumor necrosis factor 5 OS=Homo sapiens GN=TRAF5 PE=1 SV=2                         | LIILDEIAK                 | 1 | 1.108   | 8.104   | 5.104  |        |         |         |        |        | 1.108   |
| TRAF6_HUMAN  | Tumor necrosis factor 6 OS=Homo sapiens GN=TRAF6 PE=1 SV=2                         | SYDYLBIIGSSGQLAAK         | 1 | 3.3619  | 3.3619  |        |        | 3.3619  | 3.3619  | 3.3619 | 3.3619 | 3.3619  |
| TRAF7_HUMAN  | Tumor necrosis factor 7 OS=Homo sapiens GN=TRAF7 PE=1 SV=2                         | AGTLDELTVQK               | 3 | 15.8415 | 15.4807 | 2.2968 | 24     | 11.2703 | 12.1672 | 6.4433 | 8.9754 | 8.4132  |
| TRAF8_HUMAN  | Tumor necrosis factor 8 OS=Homo sapiens GN=TRAF8 PE=1 SV=2                         | AZVPHSIK                  | 2 | 2.3208  | 11.4448 |        |        |         |         |        |        | 2.3208  |
| TRAF9_HUMAN  | Tumor necrosis factor 9 OS=Homo sapiens GN=TRAF9 PE=1 SV=2                         | AQLVDEK                   | 2 | 7.3808  | 7.0994  | 1.4871 |        |         |         |        |        | 1.4871  |
| TRAF10_HUMAN | Tumor necrosis factor 10 OS=Homo sapiens GN=TRAF10 PE=1 SV=2                       | CTSPYSSQIK                | 2 | 19.6908 | 19.9504 | 1.0648 |        |         |         |        |        | 1.0648  |
| TRAF11_HUMAN | Tumor necrosis factor 11 OS=Homo sapiens GN=TRAF11 PE=1 SV=2                       | DQKVTENQKIK               | 2 | 19.8982 | 19.792  | 1.2563 |        |         |         |        |        | 1.2563  |
| TRAF12_HUMAN | Tumor necrosis factor 12 OS=Homo sapiens GN=TRAF12 PE=1 SV=2                       | DHSGQVSVNSK               | 1 | 6.9452  | 6.9452  |        |        |         |         |        |        | 2.2408  |
| TRAF13_HUMAN | Tumor necrosis factor 13 OS=Homo sapiens GN=TRAF13 PE=1 SV=2                       | FGMPLDK                   | 1 | 22.9438 | 22.9438 |        |        |         |         |        |        | 2.2408  |
| TRAF14_HUMAN | Tumor necrosis factor 14 OS=Homo sapiens GN=TRAF14 PE=1 SV=2                       | FTSQPFVGVGVHTANK          | 5 | 11.0277 | 9.2513  | 2.0484 |        |         |         |        |        | 2.0484  |
| TRAF15_HUMAN | Tumor necrosis factor 15 OS=Homo sapiens GN=TRAF15 PE=1 SV=2                       | GDACDDFDHSDYVDDCPFNVSQDFR | 1 | 0.9956  | 0.9956  |        |        |         |         |        |        | 1.0648  |
| TRAF16_HUMAN | Tumor necrosis factor 16 OS=Homo sapiens GN=TRAF16 PE=1 SV=2                       | GTLLALER                  | 1 | 13.7624 | 13.7624 |        |        |         |         |        |        | 1.0648  |
| TRAF17_HUMAN | Tumor necrosis factor 17 OS=Homo sapiens GN=TRAF17 PE=1 SV=2                       | GTSDNPWVVR                | 2 | 17.0479 | 17.0449 | 1.0567 |        |         |         |        |        | 1.0648  |
| TRAF18_HUMAN | Tumor necrosis factor 18 OS=Homo sapiens GN=TRAF18 PE=1 SV=2                       | IEDANLPPVDFQSDVAVR        | 1 | 14.0143 | 14.0143 |        |        |         |         |        |        | 1.0648  |
| TRAF19_HUMAN | Tumor necrosis factor 19 OS=Homo sapiens GN=TRAF19 PE=1 SV=2                       | IMADSGPYDK                | 3 | 10.3953 | 8.9126  | 2.0705 |        |         |         |        |        | 1.0648  |
| TRAF20_HUMAN | Tumor necrosis factor 20 OS=Homo sapiens GN=TRAF20 PE=1 SV=2                       | KDHSQVSVNSK               | 1 | 7.4166  | 7.4166  |        |        |         |         |        |        | 1.0648  |
| TRAF21_HUMAN | Tumor necrosis factor 21 OS=Homo sapiens GN=TRAF21 PE=1 SV=2                       | LNWPTPQKQK                | 1 | 13.0708 | 10.9307 | 2.045  |        |         |         |        |        | 1.0648  |
| TRAF22_HUMAN | Tumor necrosis factor 22 OS=Homo sapiens GN=TRAF22 PE=1 SV=2                       | LCNSPSPMKNPKCEGAR         | 1 | 5.0398  | 5.0398  |        |        |         |         |        |        | 1.0648  |
| TRAF23_HUMAN | Tumor necrosis factor 23 OS=Homo sapiens GN=TRAF23 PE=1 SV=2                       | MEWLELPPQVDFK             | 1 | 0.1861  | 0.1861  |        |        |         |         |        |        | 1.0648  |
| TRAF24_HUMAN | Tumor necrosis factor 24 OS=Homo sapiens GN=TRAF24 PE=1 SV=2                       | NPCDGTQDCKK               | 1 | 12.5212 | 12.5212 |        |        |         |         |        |        | 1.0648  |
| TRAF25_HUMAN | Tumor necrosis factor 25 OS=Homo sapiens GN=TRAF25 PE=1 SV=2                       | QVTQSVYDTHPR              | 1 | 12.8774 | 12.8774 |        |        |         |         |        |        | 1.0648  |
| TRAF26_HUMAN | Tumor necrosis factor 26 OS=Homo sapiens GN=TRAF26 PE=1 SV=2                       | SIFLVQER                  | 1 | 17.2332 | 17.2332 |        |        |         |         |        |        | 1.0648  |
| TRAF27_HUMAN | Tumor necrosis factor 27 OS=Homo sapiens GN=TRAF27 PE=1 SV=2                       | THTVLDISR                 | 2 | 14.0525 | 13.9784 | 1.1979 |        |         |         |        |        | 1.0648  |
| TRAF28_HUMAN | Tumor necrosis factor 28 OS=Homo sapiens GN=TRAF28 PE=1 SV=2                       | TKDLAGQSDISSLMLLELR       | 1 | 4.32    | 4.32    |        |        |         |         |        |        | 1.0648  |
| TRAF29_HUMAN | Tumor necrosis factor 29 OS=Homo sapiens GN=TRAF29 PE=1 SV=2                       | VTEENKELMEIR              | 3 | 11.9732 | 11.9921 | 1.3607 |        |         |         |        |        | 1.0648  |
| TRAF30_HUMAN | Tumor necrosis factor 30 OS=Homo sapiens GN=TRAF30 PE=1 SV=2                       | VWMEQK                    | 1 | 0.9888  | 0.9888  |        |        |         |         |        |        | 1.0648  |
| TXN1_HUMAN   | Thioredoxin OS=Homo sapiens GN=TXN PE=1 SV=3                                       | TELEK                     | 1 | 0.7146  | 0.7146  |        |        | 0.7146  | 0.7146  | 0.7146 | 0.7146 | 0.7146  |
| TXN2_HUMAN   | Thioredoxin domain-containing protein 5 OS=Homo sapiens GN=TXNDC5 PE=1 SV=2        | ALAPFWELALGHEISVEK        | 2 | 4.626   | 4.6193  | 3.5869 | 3      | 4.3169  | 3.6489  | 2.877  | 2.3698 | 2.2806  |
| TXN3_HUMAN   | Thioredoxin-like protein 1 OS=Homo sapiens GN=TXN1 PE=1 SV=3                       | EPFGLAGYK                 | 2 | 0.6728  | 0.6728  | 1.6977 |        |         |         |        |        | 1.6977  |
| TXN4_HUMAN   | Thioredoxin-like protein 2 OS=Homo sapiens GN=TXN2 PE=1 SV=2                       | TLAFTVEELSK               | 1 | 7.62    | 7.62    |        |        |         |         |        |        | 1.6977  |
| TXN5_HUMAN   | Thioredoxin-like protein 3 OS=Homo sapiens GN=TXN3 PE=1 SV=3                       | SEPTQALTEFDDREDDVRLR      | 1 | 3.1451  | 3.1451  |        |        | 3.1451  | 3.1451  | 3.1451 | 3.1451 | 3.1451  |
| UZAF2_HUMAN  | Splicing factor UZAF 65 kDa subunit OS=Homo sapiens GN=UZAF2 PE=1 SV=4             | ELLTFGRK                  | 1 | 1.324   | 1.324   |        |        | 2.0887  | 2.0887  | 1.9269 | 1.9269 | 1.6821  |
| UZAF3_HUMAN  | Splicing factor UZAF 65 kDa subunit OS=Homo sapiens GN=UZAF3 PE=1 SV=4             | LFEGLSINIDQYK             | 1 | 2.7524  | 2.7524  |        |        |         |         |        |        | 1.6821  |
| UZAF4_HUMAN  | Splicing factor UZAF 65 kDa subunit OS=Homo sapiens GN=UZAF4 PE=1 SV=4             | GLATFVSDINDK              | 1 | 2.8021  | 2.8021  |        |        | 2.8021  | 2.8021  | 2.8021 | 2.8021 | 2.8021  |
| UBAP6_HUMAN  | Ubiquitin-conjugating enzyme E2 N1 OS=Homo sapiens GN=UBA1 PE=1 SV=1               | GNGLCPHVAIWHRYNPK         | 1 | 0.2926  | 0.2926  |        |        |         |         |        |        |         |

**Supplemental Table III**

| <b>Extracellular Space</b> |                                                                         |
|----------------------------|-------------------------------------------------------------------------|
| 1433S_HUMAN                | 14-3-3 protein sigma                                                    |
| MMP2_HUMAN                 | 72 kDa type IV collagenase                                              |
| AGRIN_HUMAN                | Agrin                                                                   |
| FETUA_HUMAN                | Alpha-2-HS-glycoprotein                                                 |
| AIMP1_HUMAN                | Aminoacyl tRNA synthetase complex-interacting multifunctional protein 1 |
| CCL2_HUMAN                 | C-C motif chemokine 2                                                   |
| CAD13_HUMAN                | Cadherin-13                                                             |
| CALR_HUMAN                 | Calreticulin                                                            |
| CD109_HUMAN                | CD109 antigen                                                           |
| CH3L1_HUMAN                | Chitinase-3-like protein 1                                              |
| CLUS_HUMAN                 | Clusterin                                                               |
| COPA_HUMAN                 | Coatamer subunit alpha                                                  |
| CO2A1_HUMAN                | Collagen alpha-1(II) chain                                              |
| CO3A1_HUMAN                | Collagen alpha-1(III) chain                                             |
| CO1A2_HUMAN                | Collagen alpha-2(I) chain                                               |
| C1RL_HUMAN                 | Complement C1r subcomponent-like protein                                |
| CFAH_HUMAN                 | Complement factor H                                                     |
| CYTC_HUMAN                 | Cystatin-C                                                              |
| DKK3_HUMAN                 | Dickkopf-related protein 3                                              |
| ADAM9_HUMAN                | Disintegrin and metalloproteinase domain-containing protein 9           |
| EGLN_HUMAN                 | Endoglin                                                                |
| FBN1_HUMAN                 | Fibrillin-1                                                             |
| FBLN1_HUMAN                | Fibulin-1                                                               |
| FSTL1_HUMAN                | Follistatin-related protein 1                                           |
| LEG1_HUMAN                 | Galectin-1                                                              |
| LG3BP_HUMAN                | Galectin-3-binding protein                                              |
| G6PI_HUMAN                 | Glucose-6-phosphate isomerase                                           |
| GPC1_HUMAN                 | Glypican-1                                                              |
| HDGF_HUMAN                 | Hepatoma-derived growth factor                                          |
| HMGB1_HUMAN                | High mobility group protein B1                                          |
| IBP4_HUMAN                 | Insulin-like growth factor-binding protein 4                            |
| IFNG_HUMAN                 | Interferon gamma                                                        |
| MFGM_HUMAN                 | Lactadherin                                                             |
| LYSC_HUMAN                 | Lysozyme C                                                              |
| LOXL2_HUMAN                | Lysyl oxidase homolog 2                                                 |
| TIMP2_HUMAN                | Metalloproteinase inhibitor 2                                           |
| NUCB1_HUMAN                | Nucleobindin-1                                                          |
| PEDF_HUMAN                 | Pigment epithelium-derived factor                                       |
| SAP_HUMAN                  | Proactivator polypeptide                                                |
| HGB1A_HUMAN                | Putative high mobility group protein B1-like 1                          |
| SRGN_HUMAN                 | Serglycin                                                               |
| HTRA1_HUMAN                | Serine protease HTRA1                                                   |
| TRFE_HUMAN                 | Serotransferrin                                                         |
| ALBU_HUMAN                 | Serum albumin                                                           |
| MMP3_HUMAN                 | Stromelysin-1                                                           |
| QSOX1_HUMAN                | Sulfhydryl oxidase 1                                                    |
| SODC_HUMAN                 | Superoxide dismutase [Cu-Zn]                                            |
| TETN_HUMAN                 | Tetranectin                                                             |
| TPT1L_HUMAN                | TPT1-like protein                                                       |
| BGH3_HUMAN                 | Transforming growth factor-beta-induced protein ig-h3                   |
| TCTP_HUMAN                 | Translationally-controlled tumor protein                                |

| <b>Structural Constituent</b> |                                                            |
|-------------------------------|------------------------------------------------------------|
| PGS1_HUMAN                    | Biglycan                                                   |
| CH3L1_HUMAN                   | Chitinase-3-like protein 1                                 |
| CO1A1_HUMAN                   | Collagen alpha-1(I) chain                                  |
| CO3A1_HUMAN                   | Collagen alpha-1(III) chain                                |
| CO1A1_HUMAN                   | Collagen alpha-1(XVIII) chain                              |
| CO1A2_HUMAN                   | Collagen alpha-2(I) chain                                  |
| CO5A2_HUMAN                   | Collagen alpha-2(V) chain                                  |
| CO6A2_HUMAN                   | Collagen alpha-2(VI) chain                                 |
| FBLN4_HUMAN                   | EGF-containing fibulin-like extracellular matrix protein 2 |
| FBN1_HUMAN                    | Fibrillin-1                                                |
| FBN2_HUMAN                    | Fibrillin-2                                                |
| FBN3_HUMAN                    | Fibrillin-3                                                |
| FINC_HUMAN                    | Fibronectin                                                |
| FBLN1_HUMAN                   | Fibulin-1                                                  |
| LAMA4_HUMAN                   | Laminin subunit alpha-4                                    |
| LAMB1_HUMAN                   | Laminin subunit beta-1                                     |
| LAMB2_HUMAN                   | Laminin subunit beta-2                                     |
| LAMC1_HUMAN                   | Laminin subunit gamma-1                                    |
| LUM_HUMAN                     | Lumican                                                    |
| PRELP_HUMAN                   | Prolargin                                                  |

| <b>Proteinaceous Extracellular Matrix</b> |                                                            |
|-------------------------------------------|------------------------------------------------------------|
| MMP2_HUMAN                                | 72 kDa type IV collagenase                                 |
| PGS1_HUMAN                                | Biglycan                                                   |
| CALR_HUMAN                                | Calreticulin                                               |
| CH3L1_HUMAN                               | Chitinase-3-like protein 1                                 |
| CO6A2_HUMAN                               | Collagen alpha-2(VI) chain                                 |
| CTGF_HUMAN                                | Connective tissue growth factor                            |
| PGS2_HUMAN                                | Decorin                                                    |
| FBLN3_HUMAN                               | EGF-containing fibulin-like extracellular matrix protein 1 |
| EMIL1_HUMAN                               | EMILIN-1                                                   |
| ECM1_HUMAN                                | Extracellular matrix protein 1                             |
| FBN3_HUMAN                                | Fibrillin-3                                                |
| FBLN5_HUMAN                               | Fibulin-5                                                  |
| LEG3_HUMAN                                | Galectin-3                                                 |
| LG3BP_HUMAN                               | Galectin-3-binding protein                                 |
| GPC1_HUMAN                                | Glypican-1                                                 |
| MMP1_HUMAN                                | Interstitial collagenase                                   |
| LTBP1_HUMAN                               | Latent-transforming growth factor beta-binding protein 1   |
| LTBP2_HUMAN                               | Latent-transforming growth factor beta-binding protein 2   |
| LTBP4_HUMAN                               | Latent-transforming growth factor beta-binding protein 4   |
| POSTN_HUMAN                               | Periostin                                                  |
| SAP_HUMAN                                 | Proactivator polypeptide                                   |
| PRELP_HUMAN                               | Prolargin                                                  |
| SPON2_HUMAN                               | Spondin-2                                                  |
| MMP3_HUMAN                                | Stromelysin-1                                              |
| TICN1_HUMAN                               | Testican-1                                                 |
| TICN3_HUMAN                               | Testican-3                                                 |
| TETN_HUMAN                                | Tetranectin                                                |
| BGH3_HUMAN                                | Transforming growth factor-beta-induced protein ig-h3      |
| VWF_HUMAN                                 | von Willebrand factor                                      |

## Supplemental Table IV

| Gene           | Forward 5' - 3'          | Reverse 5' - 3'          |
|----------------|--------------------------|--------------------------|
| GAPDH          | TCGACAGTCAGCCGCATCTTCTT  | GCGCCCAATACGACCAAATCC    |
| SPARC          | CAGGGCTCTTCTCAGGGGCTCTA  | CAACCGATTCACCAACTCCACTTT |
| Col1A1         | CGATGGCTGCACGAGTCACAC    | GGGCAGGCGGGAGGTCTT       |
| PCOLCE         | CCGGAGGCTGGGGAAGT        | TTGGGCCGGTGGAGAAC        |
| $\beta$ ig-h3  | TGAACTGTGCCCGGCTGCTGAAAG | CCCCGTTGGTGGCTAGGATGTCT  |
| Ang-1          | GTCAATGGGGGAGGTTGGACTGTA | AGCCAATATTCACCGGAGGGATTT |
| VEGFC          | GAACAAGACCTGCCCCACCAAT   | CCAGCATCCGAGGAAAACATAAAA |
| SDF-1 $\alpha$ | CTGGGTTTTGTGATTGCCTCTGAA | TTGGAACCTGAAACCCTGCTGTG  |
| HGF            | CAATGCCTCTGGTTCCCCTTCA   | CTGTTCCCTTGTAGCTGCGTCCTT |
| SCF            | TATGCCTTGGCAGAGGGGAGAC   | GGTCAAGGGAAAAGCGGACTT    |
| MMP2           | CGCAGTGACGGAAAGATGTGGT   | AGAGCTCCTGAATGCCCTTGATGT |
| FN1            | CGCCACGTGCCAGGATTACC     | AGGGGCTCGCTCTTCTGATTATTC |
| alpha-SMA      | CAAGGCCAACCCGGGAGAAAAT   | ACCGCCTGGATAGCCACATAC    |
