# Supplementary material
Source: PubMed Central journal article supplement (PMC3638018)
Supplement: NIHMS437751-supplement-2.pdf [file NIHMS437751-supplement-2.pdf]

**Supplemental Table I.** Complete list of proteins identified in LA fibroblasts, HA fibroblasts and SMC conditioned media.

**Supplemental Table II.** Primary output (quantitation analysis) of PDMQ<sup>5</sup> as the basis for analysis.

**Supplemental Table III** Accessions associated with GO terms “extracellular matrix structural constituent”, “extracellular space” and “proteinaceous extracellular matrix.”

**Supplemental Table IV** List of the primer sequences used for qPCR.

Supplemental Figure I Western blot showing levels of Collagen 1 in LA, HA and SMC supernatants.

Supplemental Figure II Quantitation of **(A)** EC sprouting and **(B)** lumen formation in the presence of SMC treated with HGF siRNA. Quantitation of **(C)** EC sprouting and **(D)** lumen formation in the presence of LA Fib with addition of the indicated amounts of HGF. Data are representative of 3 individual experiments, each with n = 20.
